# Supplementary material for: Genetic and Environmental Regulation of Anthocyanin Biosynthesis in Winged Bean (Psophocarpus tetragonolobus L.)
Source: Research Square preprint supplement (doi:10.21203/rs.3.rs-7401144/v1), 2025-10-27
Supplement: Supplementary file 1 [file 2dd14bb28fef3773ebb795f3.docx]

**Supplementary Table S3** Sequence data obtained from the QTLs *qAntho1.1a, qAntho5.1, and qAntho1.1b*.

**> qantho1.1a (1,98,281 bp; CHR 4; 7303963-7502244)**

TTCATTTGTCTAGTACATGAATAATTGACAAATATAAAAGTAAATGTAGGTATTTGTTTCCGCATGTGGTTTGCTGGTGTATTTGATTATCTAGAAACTCCATAGTTTTTAATAGTAGAACTATGGAGTCGTCAGATATCATGTTGTCTATCCAGGTTCTATCATGGAAGTGGTTAATGTTAGTATTTAGCTTTAGTAAGGGGTATTTTTTCTTCGATTGGTATAATAACACTCAATTGTGCCTACTAAATATGAAGTAGGTATTCTGAAGTATTTTTTCTTTTATTATAAAGGGTTGGCATACTTGTGGACTTGATCTCGATGTTAGTTTTTTCGGATGATATCATTCTTTTTGTAAATGTGATATGTAAGGTATGAAACTCTTTGTTTCATCCTATTTTACATATAATCATATTATCATTTATTTTTTAAAAAAATGAAACTAATAAATGAGAATGTAAAAAGAAATTTTTATTTTATAAAAGTGAAAAAGAAAATTTTGTTTTTAAATTTAGGAAAAGATAAGTATAGCTGTAAAAACTACCTAAAAATAGAAAAAAAAATATGAGTAGTTAAAGAAAAACACATATGTAAATTGATTGACGAGTGCATTTTAATTTGGCGTGAATAAAAGGTGCTATTGAAACTAATTGAGTGGGTAAAATGAATAGAAGAATGGAGCAAAAGAGGGAGGGCAGGGTGTGTATTAAACAGAGTACAGTTGGAAAAGGAAAAGCAAATAAAGTAAAATAAAGAGTGTATAGGCATTTAAAAGGGTAGAGAAGGTGCTTAAATGGTGTGGGGCCCACACGTGAGGGTCACCAAACAACACTAGCAAGGGCTCTCACATAATGTGTGTTCCAATTCAGCACCACAAACAAACTCCAACAATAACATTCATTTCAGATTCAACCCAATGGCCCACCACTTCCCCTATTGACTTACACTTCAAGTGGGGAGCACAATCCGTTCATTATGCTCCTCAGTCCTCACCACTATCTTACTTTCTTCAAACTAAATTCCTTTTTCCCCCACTAACGCCACCTTCGCTTAAGTACTACATTAACTTACTAATCAAACCTGAAACTTTCTTTACTAACATTCTTGTCACTCTTTATTTTATACTACTATTATGCTTTTTCTATTCATTAATAACCTCCTTATTTTTTTAATTACTTTTGTTTAAAACTTAACATGGATTTTGGTCCAAAAATTAATTACTGTATTTTCCAAATCATTATAATTTATTTGTGTGTTTTTTACTAATTACAATAATATTTCTTAGTTTTTTAATTATATGTAATTTTTTTACTATTGTGTTGGCACTTTTAAAAGGGTATTAGCTTCTAAAAAAAGAAGAGAAGGTATCAGTATAATGTTTTCAATATTTTTAAACATAAAAAAGTAATGTAAGAAAATAAAAAATATTCAAATTATATGTAATTTAATAGATATTCAAGGAATGATGTGGAAATATGTTGTCTTTTATATCAACACATATTCAAACTTTTTTTTTTTGAATGATTCAAACATATTGAGACAACTTATTGCAATTGACTTTTTCTCCTTTGATACAATTGTGTTTTTTATAGGAAAATGTTAATTATTATTGTGTTAGTTTTTATTAGTAAAAAATTTTAATCTCACAATTTTTTTTTTTAATTTTCTCTCCACATGTAAAAAACAATTGTATTTAATTTAGTTTAGACTCTATGTATGTTTGGATGATCTTAGCAAAATTATTTGTTTATGAAATTGATTTTTTAAAATTGATTTCGAGATAATGTGATTTATGTTTATATGTTTTTATTATAAAAATAAGTTGTAAGTGTATAACAGTTTCACATTATAAGTGATTCTAAACGTAAAATTAATTTTAAATAAAATTTTTATATGTTCCATATTGCTTGAGAGAATAATCTACGATTAATTTTGAGACATGAATTAATTATGAATTGAAGCAATTTGAATTAAATTATATGTTGGATTAATAATTTTTTTATACTGAATTTTACTCTTTTTTGCCGTAATATCAAAAAATTACGGCAAAAAGTAGAATACATATGCATTGGATAGGTAAAATCTAATCCAAATCTAATTAAATCAATATGAATTTAATGTATATTTATTTAATTGACTTATAAAAAAATTATATTTAATTAAATTAAATCTTAAAAAATATTTTAAAATTAATTTATAATTAAATTTTGTTTTATTTTAAATATAATTGTCTCAGCAAATTTTGTTTGAGACATTTTATTTGATTTTTTTATCACTACTAATTAAATTTACTATTAAAACTAGTCTTAGTAATACCATGAAACTTATTTGATTTTTATGAAAAAGTTATTTATTAGATAGTAGTAGTTAAAAATCTAATTAAAATAAAATTAAAGTTTATAACTTAATTGTTATTTTAATATCCACAATGTAGGTATAAGAGTGTGTTAAGAAATAAAGTGTATCAAAGATTTTACAAGGATATACGCAAACACACACTCTTGACTCTAGATGTATTTTCCATACCTATATGGTATGTGTCACAAGGATGTGTTAGATAATGTTTTTTTTTATATTTTCTATCTTAGCACATTTTTTATACTTTTATAAAAATAGTCACATCATTGTTGTAAGTATAAGAGAGTAAAAATTAAATCATTTTACAAGTAAAGTGTGTGAAATAAATAAAAAAAATTAATACAAGTAATGCATCCTATACTAAAAAAAAGGATGAATTAAACATTTTATAAAACACAATAATAAGTTTCACCTCATGTAATAAATAGAATAACTTAGTTATTTTTTTATTTTTTTATGATTATTAATGAGTCTTTAATCTTTTAAATATATATGATATTTTATTTTGTATTTTTTCTATAATTATTAGTAAATTTTCACATTATACCATTTTTATTTTAAAAAATTTCATATCTTTAAAAACATAAATAAAATTTGGAATATTTTACTGCTAACTCTATATACTGATATTTTTAGATTTTTAAAAATTTAAATAAATAAATTGTAGGCATGAAACAATCAATTAAAATGGGTATATAAATTGGTTTTGCATGCACACACCCCAAGCAAAAAAAGAAATTAACAAATAACGGCTAGTTATTTAAACTTAAATACTATATTTTAATTCTACTAACTAGCTACAATTTCATAAAGTACCTTAAATGAATATATTTATTTAAAGAAAAAATGAAACTAATTATAGTTAACTTTATTAGTTGACAATTAATAATTGAGAGTGCTCAGTTGTCAGTTGAGAAGGAGAACAAATAATGAAAAGTGGAAATAGTCTTAATCCAGCTAGAATTGTGAAAAAATGTGGTACATGTGTAGATTCTAAGAACATTAATCCGATACATATTTGCCAAACAATTAAAGTCAATGTAACATCACATCAAATATGTAAATTGCAATATCACCCAAATGTCAACTATATCTGTAAAATTAAAAATGAAAATAAGAATAAACTTTGTGTTTCATGTAGTGAACAATTTTGTGTACAATGTAAAATTTAAAAAAAAAAAAAATAAAATCTGTTTTTTCTTTTTTCTTTTCCTCTATGCTGAAATGAAATGAAGAATGTGCACAAAACCGGAAACAAATAGAGTGAAAATGAAAATCACCGTGTCGGGTCGGGTCGGTCACGTGAAAAGGTCAACGAAATCAACGGTTATGGTTGACTCGTCCAAAATCCACAAGCTTCCTGGAACGGTTCTTGCAAAACGACGCGGCGGCGGAGAGGTGAGGCTTCGCCGCCGCGGCCCTGACCTCCGCTGCCGCAGCCATCTCTGGCGGCAATCCCTTGTGGTTCCACCTCCGGTTGGGACTCGCCCGAACCAGAGGACTCAGGCAAAGCGCCATGCCCGAACCAGACGCGCTCTTGGCGTGTCCTAGCCGCGACCTCCGTGCCGAAGGCGCCACAGTCGGCGTTCTCCGCCACCACGGAGACGCCTCCGACATGTATCCGCTTCCTGAGGAAGACTGATCACATTCGTCGCCGAAATCCTCGGTCCTCACCGGCGACATTCCCCGATCCGAGGGCCGATACCGGTGCTCCGTGGTTCCGGTCCGATCCTTGTTCCTCCGGCGAGCAGGGAAGAACGCGGAGAACCACGAGGAGGAGGATTGTTGGCACGAAGGATCCGATTGGAACTTCTCTGATCTGGTCCTGAAGAACTTGGCGAATATGCGGAACCTGTTGAGGCGTTTCTTGAAGGACCTGGCATCGGCGGAATCGGCGCCGCAAAAGGTGGGACCGAGCTGCGGAGTGCTGTAGAAGAGCCTCTCGCGGCGGTCTTCGCAGGCTGCGGAGTAGTCAGATTTCCGGCGTGAGACGTAGGGCGAGACGGAGCGAGGGAAAATTAAGGGCGGAGGGTCTGAGTTTGCGGCATAATCGTCAGAGGCGCGTGAGATGAGCCGCGTGAATTGGTGGTGGTGGGCTTGGGCTTGGGCTTGGGCTTGGGCAGCGACGAGGACTATGAGGCGTTCGCGGAGACAGGAGGCGCAGACGCCGACGGTGCTGCTAAGGTCGGATGTATGCTTCTTGCACTTCATTGGTCAGTGGGCACCAGCATTCGTGGGTGTGTCCTCCCTCCGTAAATGAGATCTGATACCTTCCAAATTTCACAAAGAGGAGAGAGAAATCATTTCTTCTTCTTCACTGTCACTCTAACTTCAGATGCTACTTTCTATTATATTTTGAGGCTGCATAAACAACCCATACAAGGGGTCAAATTTACTTCCAATAATCATTGCTCTTCACACTACAACAACTCTATATATAGCTATTTAAACTCAATTCTCATTTTCTTCTATCTTCTATATTTACAATAATGGAAAATGGAAAAAAATAAAATTAACTAATAGGCATTAATGGTTGAGGTAGAGAAATTAAAATGGAAATAATAATAATAAATATGATAAAAAGAGATATAAAAATTAGAGTAGGGACAAATTGAATTGTAATGTGGCATAGCTTAAAGAAAAGGATGGAGAAACAACTTTGCTAGCAGGACGGATAAGGAAAGGTTCATGTTGGATTGGGAAACTCATCCATCATTCATACAACATCTGCTTCAAGTTAGATTGTTGTTTTTTTCTTATATATATTTTAATTATAGGGGTAGGCTAGAGCAAATAATAAAAAATTTGGAGTTGGATCAGAATTTGCCGGTTTGGTTAAATAATCAGCGAATATGAAATTATTAAATCTATTTGAAGTGTAATTAGGAATGAGTATAATTTTTATACATTATTAATTTAAAACATTTTATTTTATCAATTAATTACAAATCATCATATACAAAAAAATAAAATAAAAATAACCTTAACTATGATGTTTAAAATGATAACAATCTTGTCATGTTTGCTAATTTATAATTATAGTGTAATAGTATATGTCAATTTTTAACTAATTTTATGAACTTATATGTTATCCTAATTTTCTTACTACCCATTAATTAATAATTTTATAAAATTTAGTATACTCTATAAAGTTCAAAAACTTATTTATCACTAATTTAATTATAATTAACTTCATTAATAAATTATGAATTGGTGTTTTCATTCATTTAACAATCTTTCTAATTTTATTTATATTGATTAGGATATTTTATGATTCGTTAAAGAAGATTATAGTGATTTAAAAAAAAATTATAGATTTTTGAAGAGTAATCTGCTACCACTTCTCTTAATTTTTAGTGTAATTATGTATTTCCTTCTTTTTATCTATTACGTTGTCGTAACAATGCAAGGTTTTGAGAATAATGTTATTATAATGTTTTAAATGTATAAGAAGTTGGTTTAATGTTTTTAGACTTAAAAAAACTGGTAGGAAAATTTAAAAAAAATAAAGTTGTGTATAAAATTATAAAAATTAAGAAAATATTATTGTAATATACTCTGTGAACCAATGTTCCTACAGTTATTAAATAAGTGTTGGTCTATCTTATTCCTACATATTCATTTGAGCACCTAGAACTTGACTCAATTTTATCATAAGTTGAGAATATTCACACATCCTACTTAACTAATTAAATTAAATTATTTTAAATAAATACAGTCTCAGGAAATCCAGATGGAAAAATAATATTTTTTGGAGTTAAATTATAAAATAACAAAATAAAATATACATATATTTTTATTTGTAATATACTTTATTTTCCTCACTTCACAACTATTTTAACAGAAACAGAAAGTAGGTGATTGAAGATAATAATAGTTCTTTTTTTAATTTTATCTCTTTACATGTCATTATCATTTTTTTTTTGTTTCCCTCGAGTGTCATGCATCTAAAGTCAAAGTAAATACTACTCATAAAAAATAGTGAAAGTAAATAAGTGATTTAACTCATCACATATATGGATTACGAAAAAGAAGTACCACTTGAGTAAAATAATTTAAAAAAAAAAATTGAGGAATGTTGTGTGGTATTTATGATTATTATATCTAACGTAATCTTATGTTTTACTAATCAAATATCTTGCCTTGTGGGCATACAATTATTGGTTGGTTGAATCTTGAATCTTGAATCTTTGTGGTTTCTTACCGTTTTCATCCCCAAACCTTTTTTATATTTCAATTTTTTTATTATTTTGCCTTGGACTTTTTCCATAATTATCAGTTTATCACTATTACGTATACGTTGAATGAAAAATGGAAGATTGAAGCGCGTGAATGGCACGCTCCATATGGTGCCTTGATTCAGTCAACGAGGTCAAACTTTGGCGTTTCATCATCATGAGCCAATCATCCTTTAAAGCTCTGCATATAACGGTTACCATATCCTTTTTCATCGCACGCTGTGTGGGATTGTTTTTTCCCTTTTCCTTTTGGCATACGTCGCCAAACCTTTATTTTAAAATTTAAAACAAAGATTCAAACCTGAAAAACTAGTTACCTTATCCAGAAGATTGAGACATTGAGTGGAATATTTATGTTGGCTCGACATAATCTCTTTTTGCTAATTGAAACGAGGGTATTATCATGTTACATGTTTCTCCATCACTCACAAAAAAACCTTCACCTGTAGATATCGTAACATGTCTTCTTCTTTTTTTTTTCTAAAACATTTAGTTTTGATTCAGTTGGCCTATTTTTTTTTTTCTGATGTTACTTTCAATCATATAAAATGGTTCTTCATTGTGACTATTTCCGATATTCATTATTCATCTTGTGTCTTTTATCATGTCAATTAGAAACAAAGAAGTCATATATTCATTAAGTATTATCTTGTTAAGAGTATATAGTATAACATGTTTAAGTGACTTATGGAGTTTTCAAATCATATCATTCAACTTTATTTTTAAACAGGAAGGGTAATAAGGATTTGGAAGACTCTGGAATATCACTTGTTGGTGTATTTAGAATGCAAGAGAGACTTTTTATGTCAATGATTTTTCTATAATTATAGTCTAAAACTAGGAATATTCTATGACCCAAAACTAGGAATATTCTATGAGATTAATTGGTATACATTGTCAGTTTAAAGATTTTTACATTAACATTCAATCATAACCTTTCATTCGTGGTAAATTTGTTAACTTGACTCATTACTATTTTAAAAGTCACATAAATGAAAAGTCGTATAAATGAAAAGTCGTGATTGAAGACTTAAACTCATATTCTATTTATCTTGTTGTTCTCCATCTGCTTAAATGTTTTTTAGTATTAAATGTATGGTTAGGATTCTAACTTTAACAAGGGGTCTTTTTAATTTGATATATGAGTAACTTGTCATAAATATTGAGTACTTTTATTTTTATAATATAATATATTTTGCCTTCCAAAATAATAAATGTTACTTTTCAACATTTTAAAAAATCAAAGTGACATTTTAAAATAGTCAATAATTATCTTAGTGATTAATAAGTATAAACAATTTTATAAAGATTTTAAGTTGTTACAAATTGTTATAAATTTATTTTGCAAAATCAATCCATCTTACTTCTCCAATCTCAATCCCATGAAAAATAGAATATGTGATTATGTATGTAATAGAAATAAAAAGCAAAGTTCAATATAAATCTTTGGTTCAACCTCCATTGACGATCAACATAAGGTTTATGTCCTTTTTCCATAAAAATTCTATGCATGCAAAATGAAGGATAAATCCCTTTAATGTCTCCAATAGGATACCCAATAGTCTTACAATATTTATGGAGTTCACCAAGAAGTTTCTTGATTTCAGCCTTGTTTAAGTCAGCTCTAACAATAACTAGGTAAGTAGAATTAGAGTCCAGGTACTCATACCTTAAAGTTGAAGCAAGTGGTTTTAATTCTACCTTAGGAGCAATTTCTTCCTCCCAATTTTGAGGTTGTGCTTTGAGTGCCTCTATCATCGCCTTACTAGACTGAAGAATAGGAGCCGATGCAATCAATTTTGCATATTCCTTTTTTTTTCATCTAGAGTGAAAGACTCTTCTCCAGTCAAATATGTCTCAAAAGGGTCTCTAAGACAAGCAATGATGTTCTCTTCCTCTATAGCCCTGCAAGAAACATCAATCCTATAACAAGAATCATTAAACGATGGTTTTTTAACAACTTTAGCCATATTAAATTCCATTACTTCACCATCAGCAGACAAAGATAATTTACCATTTTTCACATCAATTAGAACACCTGCAATAACTAAGAATGACCTACCTAAAATTATGGAAATTTGTGAGTTATCTTCCATCTCAAGTACCACAAAGTCACCCGGAATTAAAAACTTACCAGTTTGAACATGTACATCTTCTAGTATCCCAACTAGGTATTTAATGGATCTATCTGTTAATTGAATAGTCATTCCTGTAGGCTTTAGTTCACCTACATCCAATTTCTTATAGACAAACAAAGGCATCAAACTAACACTTGCTCCAAGACCACATAAAGTTTTTTCAAATTTAACATTACCTATTAAGCAATAGAGAAACTATCAGGGTCTTTAAGCTTTTTAGGGAGCTTTCTATGAACCAAGGTCATTATTTCTCTCTCATTCACTTTCCTGCAATTAGCAAGTATATCCTTAAAAAATTTTGCATAAGTAGGCATTTTTGCACTACCTCAATAAAAGGAATGTTCACATAAACTTGTTTAATCATTTCTAAAAAATTTTCAAATTGTTTATCAAGTTTACATCTTGCTAATCGTTTTGGAAATGGAATGGGTGGTTAGTAGGGCTTAGGTTAAACAAGTGGAATTTCAACCTCTTTTTCAAAGTTATTTTTCGTTTTCAGGTTCAATAATTGGTTGTGTTTCCTCTTGAACTTCCTTCACTCCCTTTTTAGTTTTATTAATCACAGGTTCATCCAAGACTTTACCATTCCTAGTAACTATTGCATTAGCATGCTCAACTGGATTAGTTTCGGGCTTACCTGGAAACTTACATGGGGCTCTGCTAAAAGAAGACATATGTTGAGCTATGTGAGAAATTTGATTTTCCAATTGCTTGTTGAGAAGTTTCATGTTATCCATTCGAGTAGTCAACTCCTTAATAGAGTTTCTCATGGTCTCATTAATTTTCTTTTGACTGATCATGAACCCCTCCATTAAGTTTTCTAACTTGGAAAGTTAGGATTGGAAGCCTTGTTGTAACCTTCTTGACTATTTTTCCCTTTGTTAGAATAGGATGCTTGGCTCAAGTTTTGTTGTGAGTACCCTCCTCCTTAATTTCCCCGCCCTTGGTTATTGCGGTAAAAGAAATTAGGATGAATTCTCCACCCTTCATTATAAGTGTTGGAGTAGGAGTTAAATGTTTGCTTCCTAGCATGGCCATAAAAATTATCAGTTGCAGCGACATTTTCCATGGTGTTCTTCTGACTATCTAGCATCCCTACTTGACAATTAATAGTCAAGTGTCCCTATAACCCACAAATCTCACAAAAAACGTTAGAAGCACCTATCACACTAACATTGCCTCTTTCTAACTTATTAAATCGTTGATTCAATGCATCAAATTTTGCTAGAATAAGGTAAACATTATTTACATCATACTTACCTAGAATTTCCCTTTGTGAGTTATGGCTTCACTCTCCTACCCATTGGCGTTGTTTTCTGCTACAACCTCAATTATATCAATTTCTTCATCCAATAGCTTCCCCATAAATGATTCACCTGTTATAGAATGTAACAACATCTTATTGTTGTAATTCAATCCATTATGAAAAAAATGGATTGTTAAGGGTCTCTTAAGGCCATGACAAGGACATGATAGTAGGAGCTCAGAAGATCTCTCCCAGGCTTCAGGAAAAGGTTCTATATCCTCTTGATTGAAATTAATGATTTTTCTCTTCATTTCATCCATCTTTAAAGGTGGGTAATATTTTTCCAAGAAAGATCTTTCACACAATACCTAGATAGTAACATTATCCCTAGGAATAGTTCTCACTCATGTCCTTGCTTTTCTTGCTAGTGTGAGTGGTAAGAGGTGTAAGCGCAACGCATTTTGTGTGATTCCTTGAAAATTTTGGGTCTCACAAATTTCTAGGAACCCTTTTATGTAATCTGTAGGGTCTTCAGAAGGTAACTCATTGAATTGGTTCTACTTCAGCATATGAAGGAGTGTGGGAGGAATTTGAAAATTTGCATTTCCAATGTTGGGTCTAGCTATTCTTCCTAGCAACCTATGAATGGTAGAGCTGCATAATCTCTAAGAGATCTATTTGCACTTACTTCTTTTTCAGCCATGGCTAGATTTTGTTTCTTGATCGTCACTATTTTTTGTTTTTGTGTTTTTCTCCTTCTATGGAATGTTCTTTCAATTTCAAGATATCTTTTTATTAGTTTTCCAACTCGTAGAGATCTTGGCATGCACTATATAAGATCCTGAAAAATTAAAGAAAACAAAGAAAAATGTGTGAAGTTTAAAAAAGAAGGGAAACAAACAAATTAATTAAAACTAATTCAATAGTAAAGTAAATTAATTAAAAATAAACTAATTTAAAACTTATTAAATTCAGGAGTAAAGTCAATATAAAAAAATAAATAAATTCAAACTGATTAAGGATAATAGTAACGGAAAATATAATTAAAAAAATTAATTAAGAGAATCAAATAAAATTAAGAGTTTAATTTTAATTGGTATACACCATCGATGTAAAAGATTTTTACATTGACATTCAACATTTATGTGACTTTTAGAGTAGTAATGAATAAAGTTGACAAATTTACCATGAATAAAGAGTTATGATTGAATCTCATCCAAATCTTTCCGTACACGAGTTAAACTCTAAAATTAAATAAGGAGACAAAATAAAATAGGATAAAAAAATAAAATTAAAATTGAAAATCATAAATTAATTAAAATTAAAAATCAATAATAGATAACAAAACTAGAAAGAGAGAGAAAAATGTGAAGTCTAAAAAAGGAAAGAAAGAAGAAAAAAAACAAGTAATTAAAAATAAAATGAAATAAATAAATAAATAATACCAATTAAGGAAACAAAAATACAAAGATAAAATAAAATAGAATGAAAAGAAAAAAAAATTAAAATCACAAATTAATTAAAATTAAAAACAAATATAACTGAATCAAGAGTTACAGTCCCCAGCAAGAGCGCAAAAAACTTGATATATTAAAACCACAAGTATACGATGTCGTCAAATAATAATAATAATCGTTCTTCACAGAGACTATGTGTTTGGAAAAGAATAATTTTTTATAATTTTAATTAATTTTTTTAAATATAATTTAAATAAAAAATCAAAGTTCTATACTTGATAAAAATAAAATATAAAATAAAATCGAGATGAATTCTAAAATCAAAATAAGATGATAGTTTTAAATAATATAATATCAAAGATTAGAAAATCGTAACTAAAATAAAATGTAGATTTTTTTAGATTTTTAATATATTTGAAATATAGCAAATATCTTATAAAATAAAGGAAGAAATAATTCAACTATTTGAAATTCAAATTTTAGAAAATTTTTAGGATTTGGGATGTCACACCATGGCTTCCTATTGAATCAAAATTAATTATGTTTTATGTTTTCACTAGTCCTATGTGAATGTCAATTAACCTAAGATAATTTTTGTTCTCTTTCAAGGTACGAAGGAAGGTGAATCTAATTGAATTGACCCTTACTTTAATGGTAGCTATGTTACTCTCATTAAGTTCCTTACTAATTCATTGAGTCCTCCTCGAAGGGTTAAACCTCCTTTCACAATTTAATTCCTAAGTTTCTTCCCTGGTTTCGATAATTAAGTTCACATTTTGGTTTTTTCCTCGTTATCTATTACTACGAAAATGATGATCAAGTGTATTGCATCGGTAAAATCAATAGAGAAGAAATCAAGAGAAATCAACATAAGAACAATAAAAATATTTAATTCATCATCAATAGAGTCAAGGATTAAACTTCAATCATAGAATAAAAAGTCTCCAAATTTTTCTCTTTATGTAGTCTTTGAATCAGAAGTTAACGAGTTTCGAATAGAAACTTTCTATTTAAACTAACGAACTTTCTCTTTCTAAACTAAAAAATGTCATAAAATAGAGCACTTAAATTGATGACACAAGGGAGTGTTTATTTTTGCACGGAGTATAATCTTTATTAATTAACTCATAATTTTTTTTTTCTGAATTTCTTCCATAGTTCCAAACTCAACTCCAATACTTCAAATTAGTTCAAAAGTGCATCAAAATCTAGCAAATTATATCTTAAACAACAAAAAACACTAAAAGCATAACAAATTCCAAAATGTAATTAAAAGACACATAAAATCCAAATATTAAACCTAAATCACATAAAATTAAATAAAATTTTAATTAAAATAAAACCTAAAAATAGACAAAATACAACGCATCAAACAACAAAAAAGAAATAAAAATGGAAAGGGAAAATGTATAGATTCAACAAAAAAATAAAAAATAAAACAAATAAAGAAAATAAGAAGAACAAGGCTTGCGGCGGAGGATGGGTTGTGGATGGTAGCAATGGTGGTGGAGGGGTTACAGCTCGTGATGGTGGAGTTGGGGGAAGAAGGAAAAGGAAGAAGAGGAAAGGGAGGCGCGAGGGGAAGAAGAAGAAGAGCGGCAGGCGCGAGGGGAACGGTGGAAAAAGAAAAAGGAGGAGGAAGAAGAGGAAAGGTGAGGGGAAGAGGAAGAGAGAAGAGAAGGTGAAAAATTTGAAATGAAGGGGAGGGCAGCATGAGTGAAAGAAAAGGAGAGGGGAAAAAAGTAAAAAATGTAAATTTTTTAACGTTGGAGTACGGTGGGGTGGAAAAAATTTATCATTTTAATTTAAAATAGAACCAATTTTTTTCTATAAATTGAGTAATGAGGTTTAAAATTTTTCACACAAAGTTTTTACACACAATGATGAAATATAGTTGGGAACGTTTCGATAACAATAATGCTGAAATTTAATTTTCCTTATTCAATTGTTATGTTTGTATTTTTGCTATCAATTTTATGTTTTATCGATATTTAAAGTATTTTTATTCATAAAAAAATGATTTATAATTTATTTTTATTTTGTTCTAAATTTATTTGACAATTAAACTATATAATTATTTCATTTAAATTATTTTAAAATAAATATTAAATTTGATAACGTGAATTTGTGGGGTCCATAAAAAATGTTCTAAGATCGCAAAATGTAATGTTCTATTAGAGTAAAAAATAGAGTTGATCTTAATGATATAACATGGCATTGCGGAATTCACTATAAAGTAAGATTAGATTAAAAGGATTGATCTACCCTTAGATATGTTCTAAGTATAACTCCTATAGCATAGTGGGCTCAACCATAAGAGTGTAAATCTAAATTTGGTTATCGACACATCTCCTATGATACTATTGAGTAAGAAAAAGTATTGTGGCTAATACTCTGAAACTCTCTATATTGAGAAATAACTTTAACTATAATATTAGCAAAAAGTTTTATCGACATATCATAAAAAATATTGACAAAAAAAATCAAAAAATAACCTTGATAGACGTTAATAAAAAAAAATCTCAGTTGATGAAAAAAAAAATAGCCCATGTCAAACAAAAAAATCTCAATCGAGTTTAGTAAAAAAATAGATTTGAAGAATTTTAATTTTTTACTATTTTTAAAAAATTTAAAATTCTATAATTTTAACCAATTAAAATGCTTTAAATAATTATTAAAATTTTAAATTCTTTTAAAATTATTCATCCAAACAATATAATTTTATCACACGTATTTAGAAATCTCAAATTAAATGAATTCTCCTTTTAAAATTCTTTATCCAAAACACCCAGATTTTCTTAAATCCTTTCACAATAAACTTACCATTAATTACAATTTTTATTTTCAATTTTATAATTTTTAATTTTGAGAATTGGGTATTAAAAATATCAGACAATTTTTAAATTTTATATTTATCAAATATTTACCGAGTGACGTTGATCATTGATGTGTTATGGTGAATCCAATTTTTTTTAATGGTAGCAACGAAAAGTATCATAAATTTTTATATGATGCATAATTTCATGAAAAAAAATAAAAATATTTAAACTTCTATATGCTACGATTTTCCTCAACACATTTTTATATTTTAGAAATATGGTATAGTTTTTTTATTCTCAATACTATTAAAAAACATCTCTATTTTATTCTCCATTAACCAAACAATAATTAATTAAATTGGTAAAACTAATATAAATTTATTTTCTATTTTATTTATTATTTTTTACCTTAATTTTATAAGAAAATCTATTTTGGGGACAACACCAGTCAAATTTTCTTTTGTCAAACATGATATAAGTAAAAAAGTCTTCATGGGGTCGATTCCCCATATCAATATAAATGCATTCGTCCCTGCTGATGTGTTACTATACAATCTTGACATCATTTCGAATGGTGGTTGATTTTAGCATATTTACGTGGTTTTTTATTTTGTTTTATGCAAAAATAAAAATCACAAAGCATTGTAAATTGGAACTTTCCATTTAATATTCTGTATTAAATAATCAAGCCAATATTAGTTTTATTAATATATCTATAACCGTAGTTAGATGATAGTATAAAATTGTTTTAATCGTTGTTATAAAAATAAATATTTTTCATTACCAAAGGTATTCAATAGGTGAGAGAATGACTCATAGGATGTGCCCTACACACACTAACAATTATTAAATTCTATTATACATTTGAACTAGTAATTTATTTTCTTTTTTGGTTACAAGGGATGAAAAAAAAAAAGAAACCAAAGAAAAACACGAGAGCAAAAATCAAGAACGAGAGAAGGCAATATGCATGGTATGAGCTCGGAGAAGAGAGTTGAGCCTTGCAGGAGAATGTTGGAGGAAGACCAGAAATTTTATCAAAGGAGGAGCCTAGCTTAGCTAGCATGCCAGTGCAACTGTTCCCTTCCCTAAGCAGGTGAAAAATAGAGCAAATCTAATCAATGGTGAGCAAATGCAAATGGAAATCACCTCATTGGCACACAGGTGGTGGCTGAAGACTCCTTTCTTTATCAAGTTCTTTGTGTTCAATGAGTAAAAAAAACAAATGATATGCCTATAACCCTGCTCCCAGCAAAGCTCAAGCCTATAGAGCAATGCTAGAATCTCTTTGTGCATAATGGAAACTTCCCCGACAAAATCATAGAAATCAAAGATGAACTTTTCTCAAACATCCCTACTAAGACCACCATAGTCAGCTCTCCTATTAGAGGAACGCTCCCATTTGAACTACTAATTTAAAATCTATTATTGCAATTATTATTAATTAAATATAATATAATATATAAAATATAAACTATTTATTCTTTAAATATTTTTATTTTTGTTGTTATTGTTGTATTAAGTAATTTGTTATTCTACATATTATAGTAATATATTTATACCAAAAAAATATGTATACCCACCTTACTTGACACAAGTGGTATGTGACTTGTTTTCATTAACAAAATGATTCATGGATTTAGTCTTATCATATCACTTTAAGTATAGAACAACCTATGTCGAGAGGATAATACTTACATTGTGTATACTAAAGATGCAAGCAAGTTTACTCATTACTAGTGGCAAATGACTTATTTATATATTACTATTGTTAACAATTTTAAATGAAATTATTTTTTACACATTATCAATCAAATGTTACAATGCCGCTTTATAGTTACATTTGTCAAATTGTGATCCAACAAAGTTGCAAATGAGAGTCTATAAAAATAAGTTTATATTTTAGAGAAACCAAATTGATACAAAATTGTTTTTAAGATAAGAGGAATATTTTGCATATTTTATATGGACCCAAAACATGATTTATTCTAAATATAATATTAAATGAATGTAGAAAATATATTATTTCCTTCATCCTAGAATGAGTATTGTCTTAATTAGTTATTTAAAAAAATGATAAATAGATGAAAGAGAATGTAATTTTACAAAATTAACCTTAACATCAATATTATATTTAAAAAGCGAAAATAATATTATTAGAGGTATTGATGAAAAAAAATCAATATCAAATTAAAAACTCAAAGATGACACTTATTTTAAAACAAACATTTTTAAATGTAAATCTCATTTTAAAACAAGAATAACTATGTAAGTTTAAGAATTTTTTAATAATAAGTATTTTATAAGTAAATAATAGTTGTTAGTGGAGGAATTTAAATCTATCAAGTTATCAATGTTTTTCTTGTCTCTTAAGAATTAAGGACAATACTAGAAAGTTTATAATAATTTACACATTCTATTCAACCAATTGAATTAGACTTCTTTAATAAGTTAGCACTGTTTAATAATATTATGATTGATAAAATTATATAATTGGACGAGGATATAATTAAAAAAGTTAATATATCAATACATTTTAATTAAATTGTGTTAAATTAATCTATTTAGTCATTGACCCATTGCACTTTCTTTTTTCCTTTTACTTCGCCAAAGCACCAGAGGTGAAAATATAGAAGCAGAGTTAGCAAGGAAGAAGGATATTATTTATATTCGTCCTTTGGATTCTGACACGTAATTGGAAATGCTTTTCTCTTCTAGGGGAATTGGTGTATACCATTACTTGCACGCATAAAGGTTCAGGTTCTCACTTCTCAATGATGCCTGCATAAATTTGCAATAATGCAATTTAATTTCTTTTCACCAACGCCACGCTAGTTTCATTTGCTTTTTATTTTGCTGTATAGTTTTATTACGTCAGAGTCACACACTATTTAGGAGAAAGAATAATATTTTATTTAGGAAATGTAAATTAAATATAAGTACGAAAAAACACGTAAACATAGTTTCAATTATAAGATAAATTATATAAACATTGTTGTGTTTCAAACCTGGATAAAAAATAATGCAACAACTATAGTGATTCCAAAACTATATAGAGTGCTCATTTTCATTTTTTTACAAATTAACTTGAATACATCAAGATTCCAAAAATATCCCAAATTGGTGTACAATGATGTATAAGCATAATCCAACACATAATCTTAGGTAGTTTAATGTAGACTGATTATGACAAGAATTTTGATAATTTTCTCTTTCAAATTCAATGGAAGGGTAAAACTTATAATCTATAAGCATTTTTTTATTACATATTAATATCAATCTTTCCTAACTTCAATTATCTTATGGTTAGAATAGTGTTTCTAGTTGCAATTAAAAAATTACTACAAAAATAAAAAAGTAAAATTAAAAACAAGTGACACAAAACTTAAGGAATAATATAAGAACTAGAATCATATTCTTCAATTGGGATAGTTCCTCCTTCACAATATTTAATGATTTTCTTCATATATCAACAAATATAATACCAACAATCATTATTGTTAGGTTGCCTCGTACACTAAAAAAAATACGTAAATATTAGTATAACTGAATATTAATATTACAAATTTATTCTTACATAACAAATGTAAACAACCTTAATTGTAATCCCTTTGATATTTGTTAACTTTGCTTTCAAAACCTTAGCTCTTATTTGTGCCTAATAAGTTTTTATAACTCTAATAATTCAATGAAGACAAACAATTTATATATAAGTAAAAAAATATATATCAACACCCTCAATATGAATTATACATTCTTACATGTCAAACAACTTCTTGATATCTTGTCTTATACTTATGTCATTATCCAATGGGTCCACATAATAAAATATTTCTCTCATAAGATTGATTCTAATCAAGATCCAGCGTCCACTAAAACAATGACATAAAATTAAAAACAATTATATAGAACATTCAAAATAAGGCATTATTAAGAATAAAGATCGGAAAAAGAAACATTATTCTGTATTAATCAATGCAAGAACAGACTTATCAATCATCTTTTTGTTAACAAAAATATCAACTATTTTTTTCTTTTTTTTCATTCAGAAGTAATTCATGTATTGTTAATTGTGTGAATAAAAAGAAGCATGTCTTGTGATTAGCTATAACAAATGTGTGATACAAGTACCTTAAGTAACAAAAATTGTAATGATAAATTAGTAATATAAAAAACATGATATTAATTCATGTTAAAGTTAATAAGATAAAGTGGTTATCCAATATATACAAATATTACAATTACTCCTAGCCATGCATAGTTGATAATTTCTCCAATAACTTCTTTATTGAGTATTTCTTTATGTTCATCTAACCCAAATATATCTCCTATTTCTAATGGGCAAGTGACTTTACATACTTTAGTTTCAAATGTGTTTGAAGATAGTTACAATATTGGGGATTATTACACCAACAACTGCATTAGAACAATGTTAACAAACATCATTTGCTCAACACTTTTCCAATCAACTAATGAACCCATTTGTCTTTTGGGAACTTTTCTTATTTGCTATAGATGTATCCTAAATATCACAAATTAGATTAATTAGCCAGTCAATAATATTGTTGTAAATAAATAGCATATTTTATTGTTAGTATTTCACCATCATCATTAGGTATAGGTAATTAGGCATTTGGCTCCACTGCAACTTCAATACTAATTTTCACATGACCATCTGGTAAAGGTCTCCCATGTAGCGTATCATTCAAAATGTTATGCCCTTTTCCATGTGCAACCAAGAGAACTAAAGGTGATGATATAAATAATTTACAACAAGAGATCTCATATATTATAAAACATAATGAGATAAATAAATATGTGAAAAAATTTCACATTAAAACTAAAGAAAGATAAAGAAACTAATGACCTCAGGAAAGCAATTAGATGCAATAGTGCAACTCTTGTTGACTCTAGAGATCTCATCATTTGGTTGTTGTACAATATTCGTTGTATTCTTTTTTTCAATAGTCATAAAATTGTTTTCCATTTGTTGTAGTTTGTATTCAAGTCTTTCATTTGAGCAGTCAATGTTTTATGCTCTTATAGTGTGGGTTGCTTTTGAGGAGAAAAATAGTCTTTGTGAGTGACTCCAAATCCTGTTGCCCTAACACAACCAAGGTACTCTAGGATACATAAAGCCTAAGAAATAATGTTGGAACGAGCATTTTGTAGATCATCAAGAGATAAAAACTGTAATAGTGCCTCATGAACCCAATAAGAATAAAACAAAGTGAAACCCAATTTTGTTGCACATAATAAAGAAAAACTCGTGATAACGATTATTATACTTACAATTTGATTACAAACTTCTCGAACATTTTCATTATCAATCTCTCTAACCTTGTTCACATGCACATGCTTCCACAATTCTTCACGAGAAATAGAACTAACATTATTTCTCGATTCCTTTATCTATTTATTAAGACAATTAATAAACTTACCAATTATAATTAATTATTAACAACAAAATATTATGTATTCATATAAGTGTGTAGATAAACTTAGCATTTCTTGCTCTAGATGTGCATACCCTTTGCATGAAGTCCTGCATGAATAATTAGATTGTGATGATCTTTCCCTGTTTTTTTTTTTGGCTTAGTTCTTATATTAATATGTAATAAAAATATTATGTAATCACAACATGTAACCTAATAAGAATCAAATGTTAACAATAATATTATAGATTATGTATCACCTGAAATGAATTACTTGTATGTCACAATTTTTTTCCAAACATCCTCAATGACTATGGATGCATGTAATTTAGAAGGATTCAGGGTGGATTGTCTAGATAATTCCTATCTTTGTCCTTTATATAACGAGTAGTCAAGCTAGTTGTAAAATTCTAAGCAATGTACTTGTCTCCTTAATATCCATTTCTTGTGAGATTCATCAATAGTAAAGGTCAACTACAAAAGAAATAATTTAAAAAATGTTATCTTTTATAATGACAAATAATTATAAGAAAATGATCGAATAAATGTTATATTACCTTTAGATCCAACCACAAGTCATTCTTAAATTTAGTAGTAAGCATACTATTCCATTTCTCACATGTTATAGGAATATTTTGTCAAACATAGGTATCGATGTAACTAGTGAGCTCACTACCTTTGGGGGTAATTAATTGACCTTTATCATTCCATGAAACCTAATAAAATGAATGAGTACATATTATATTGAAAGTTATAATATAGCTAAGATTATAAAATCAACAATGAATAGACTACCTCAACTTTTTTTCCCTCACTTCTGGCTAGAATGATTTTCTTCATAAGAACTAGTCCTCACTTCTAGTTACAGGTATTAACTACTTCCAAATTATGTCCTGCTTAAGTGAAGTTAATGGGTGAGTAACATGGTCTCTTTTAATCCTTCTTTAAATATCGATTATTTTTCTCTTCCTTGAGACTAGATTTGTTTTTCTATGCACATTTCTTTCTAGAAAATATCACATCATATAAAAAACAAATAAGCATGTAATGTGAACAAGGGAATAAGGTGGTGGTAATAAATATATGTTATGAAGGGTAAAAAACAAACAATGATTGTGAACTTGGTTCTAGATCTTGTATTAGATCTTAGACAACAACTAAATGGTAGGATAATTGCTTACACTGTTATGAAGATTGTTATGCAAAAAGTGAGATTAGTGGAGGTAAACTTATCTACCTTTGAGGATTACATCAAAGAATTGAACAGGAGACAAAGGGTTAAAATACCAAATCTTGAGAAAGAGTTGTCTAGATTTTGTATAAATATTGGTTTTCACTATGTGTCTCTCCAACTATCCTCTGCATTATTTAAGAAGTACTTGAAAATCATCAAAGTAGAAGAAATAAAAAAATTAAAACAAAGGTACATTTGTAGATCACAGAGATGAGTCAAAGAAAGTGAAGGATCTTGGTAGCGATTTTCATCTTATTGTCATGGAAGCTGCCATTGCTCAAGGTCAAGGTAATGGAAATAACAATGATAAGGCTCAAAAGGAGAAGGAAAAGAAGAAGAAAAAAGAAAAAGAGAAAAAGGCCAAAAAGCAACGTGATGAAGCCTCAAATTATGATAAGTTGTCAATTCTGCCAACTAGTCAAGAATAAAGGTTATGCAGAACAAACATTATCAATCTATGCAAGTTTCAGAGACCATCTGGGATTATATTCATCATGATCACATTGTTGACATCTTGCACTTTGGTTTCTTTTTATTGTTTGGAGACAAATAAATGTCTAAAATGTTGTCTATGATCATCTGGTGCAGACCAATTACTTTAATTATACATGTCATTACTCATGAATATTGCAACAGACCAATTACTTTAATTATACATGTCATTACTCATGAATATTGCAACAGGCTTAAAAATCAATTTTCCTTGTGCAAAAAATTCTTTCATTTTTGAAATTACAATTCAATCAAATCATTTCAATCCATGTCAAAACCTAAAATAAAACCCCAAAAGATTTCTAAAAAAACTGAGAAGCATATGTAAGGATTTTTCCATTGATACCTTGTAGAATACGCAAATCACCACAATCAGAATGAGAAAACAAAGAGCCACCAACAAAGACGTAAAAAGGATGAGCTTTAGAGAAGGATTTGGCAGATAGGGGTTTGCGTAGAGAGGATTTGAGCAGAGAGGGATTTGACAAAGGAAAGAGTGCGAAAAATTTGTAAAACGAAAAAGAAAAAAGGAAACCAGACAAACTTTTTCATATGCGTGCACAGTGTTTTCCTTTGTGCCTTTCTCTTTCTTTTTTTGGGTTTACTCCTCTAAATTAATAACGAAGCAATAAACTAATCAAACTCAATGTGCAAAATATTTTAATATATTAAATATAGAATTTTATTTAATAATTTTAAAAATATATGATATTTTATATTTTCTTAAAAATTATTCTTTTATTATTTTAATATGATATTTAAAAAATTAAATATAAATTTATGAGACCAAAGTATATATTTTAAAAATCACAAATACTTTATATAAAAAGTAAACCCAAAGTAAAAATCACATATACTTTGATGTCTTAAATTTATATTTAATTTTTTTAAATGTCATGTCAAAATAATAAAATAATACTTTATAAGAAAATATAAAAATATTTTATATTTTAAAATTATAAATAAAAAATCTAATATATTAAAATATTAAAAAATAAATGATAATAAAAACTAAAATATATTTTAAATTTTAAAAAATAAATATTAAATAATTATGAAAAAATTAACAATAACTAAAACATCTAATATTATTTTTCAATGTTTCGATTTATATAAATAGAAAATAAATTTTTCAACTTTTATAAAATTATTTATATAAATATAATATTTTAAATTTATTTTTGTTTCTTATTTTTTATATTTATGATAAGAGAAAAGTGTTGAAGACGTGTACTAGAAAAAAATCAAAATTGAAAGTTTTTTTTTTGTTATTTTTATTATAATAATTTAAGAGTATGGTTTCTACAACTATGTCTCATTTATATATTTTCTTGATAGAAGAATGTTACATTTATTAAATCAAAGAGAAAAATAATTTAAATTTAATACCAAATGTATATATGGCTGTTAAATATAATATAATATAACTTTATTTTTCTCATATATTATACATTCCTTATTTAAATAAGTGTTGTATAGGAATTGTGCCTTTTTGCTTATATAGTGCTTTAAATAATAGACATTGTACTGGTGACGTTATTATACCGTACTCATGCAAACAATTGTTGTATACGAATTTTGGTTTCTCTTATATAGAGCATATTCAAATAAACATTGTATAAGTGATATTGATATACAACGCTTATTTATATAAGCATTGTATAAGCATTTTGTGTTTTCTTATACAGTACACATGTAAGTAAACGCTATATAAATTACGCTATATATTCATTATTTTGGCGTAGTGATAATTACCCTTATGAGGAGTGTTAGAAATATATTCTTTCTTATAAATTAAAAAAATTGAAAACTACAAAACAAAAATATTCATAAATTCAAATGTAAGACCCATCGTATTTGTGATTTAAAAAGAAAAAGTGTACTCCCTCTGTCCCAAATTATCTATAATTTATAGTTTATATATATATATTAAGAACAACATTAAATATATTATCTAAGTTTTCTCATTTTCATAAAATATCTTTCCTTAGCATTTGATATATCAAAAAATAAAGTGAATCGTTGAAAATAAAATTTTGATTTAATGAAAGATGTTTAAAGAATAATTTCATTAAATAAGGTAAAATTAGGTAAAATTTATTTATATATGTACAGCCAACAAAAAAATGTTTATATTCAACATATAAGGAGTGTATAAATTCATTATAGTCCAATCTTTTCCTACTTACCTCATTTACAAAAGAAGAGTTTTGATTAGCCAAAATGCCTCAATAGAGGTGTGTTTCCTCATTTTCTTTATACCATTTATATTGTGTTAATCCCAAAATAAAGAAAATATTTCCTCAATGCTTGATTTGAGAACCATTTTGATATGTAATATAAGATCATCTCAAGAATACTAACTAACATGCTAAGGACACTTCACCCAAAATGTATTTCCATAAGCAATCCACATTTGTTGAGAGCAGACATTCCATTATAAATAATGTCCTTGTTGCAATTGAGAGAATACATCATATGAAGCACAAGAACAATGGAAAATTTGGTGTGGATGAACATTTGGAAGACTTTTGACAAAGTGGAATGAGCTTATGTATTTGCTATGATGTTGAAATTGAGCTTTGACTCAAAGTGGTTGCATGGATTAGAATGTACATTGAGACTGTGGATTTTAATGTTTTAATCAATAGTGAATCAATCAGTCTTATTTACCATGACTTTTACCATGTCATAGGTCTTAGATAGGATACTCATTATCACCCTATTTATTTATAATTTTCACTGAGGACCAACAACCTTAATGAAAAAGGCAAAGACAAGAGATGTTACCCATAGTGTTAAAGTGTGCAAAGGAGCCTTTATCCTCTCACAATTGTTATTTGCTTATGTTTCTACCACCAGTACCAGGACATCGTTAGGGTGGGTTATTGTATTTGAGGTATTATCCGCTTTGGAGGTCGATGGCTTCATTACAATTTTGTCCTGAAAAGGCTTCTCGATGGGTTAAGGGAAGATAGCGTTTATAAAAAACCATTGGCCTCAATTCTTAAGCGATGTGAGACTTTGAGATTACTGAAAGAAGCCCCCCATTGTGGCTAAGGGGTATAGAAGTATGGGTTCGGGCCCTACAGTGGATGCTAAATGTTCTACAAGTGTCAATGTATGTCTTAGTTAGTGTTTCGTAGTTTCCCCTCTTATATTGATCCTGGTTCTAATGATCGTGTGCCTTCCATTTCTTGGGCTCTCCCTGGTTGATAGAAATCAGTTTCCATTACTGGGATGAAGATCATGAATAGATATCACGAGATCAGGGGCGAATATCTCAAGGTTGAGTGGGTCAGGTCGTCAAGGTTCATTCCTAGTCCACAAGCCATCCAACCTCGAAGTCCTGTGGAGTGAAAAGGCTTAAACTGATGGCCACGAGATCACTCGGGTTGGGTCGATCGTTGAGGCCCATCCCCAGTCCATAAGCCCTCCAACTTTGAAGTCTTGTGGAGTGAAGAGACTCTATCTTGCCAACGGGTAGATCTTTACCAAATCTACGTGCTCTATTACCAAAGTCGCCATCACCTCTGCCACTTCCACCATAATCACTCTTACCTCATTCTCTTCCTTCCCCCATTTGCAAAATAAAGAGGGTGAAGGACAAAGGCATGCATACCTCCAAGATGTTAGTGTTGAAAACTTTGTTCACCATTGCACTGATCACCAAAACAATATTGTCAAAGCACCTTTTAAAAATTCCTCTCCCCAAGCAAAGAAACACTACATGCGAGGCATTGGATTCTTATATGTAGAGGGGAGGAGCACTGAAGGAACACGAAGTCGTTTCACGACCCTTCGCCACTCGTGACTCTCTATCTCCTGCGTTATTTCAATTCCTTTGGTTATATGATGACAGGTGGCCTCTAGTAGGGCGAGAAAAAATGTGTGTCAACCTCATGCCCCTTTACTCCCTACTCTAGCTTACAGACCTCTTTCCTCCACTCAAGCAATAACGTGTGGCACCATGGCAGACCGTAAGGATGATTACAATGGGACGGTCCCATTAAGAGGACAAAGCAGTCAAATCATAGCAAGCCATTCCCCGTGAAATTTGGCTCCATCAAAAGGACCCTCAAAGTGCCCAAGCAAAGGAAGGCCCACGATCATCAGAATCAGGACCAGAGGGGAAACTATGAAACCTAACCAAGACACATTCACGACTCCTTCTCAAGCACTTGCCATTGTCTAGAAATTTGTCTTGCCTCATTCTTCGATTATTAGCACATCAATTCCTTGCCTTTGCTCTCATTGCTGCTAGAAGTCCAGTCTTTTAAGTTAAGTGAAATCCTAAAAATGGACAGAACAGACCATAATCATACCTAAAAATATTATCAGAATTGTTTATGATTTACTGTTTTTTAGGGTAATAGGCACCAAAGTAGAAGCATTGCAAACAATGTTATATCCAACTTTAAAAATTATTTGAGTTGATTCTCAATTTCCATAAGTGAGCGATATTCTTTTCTGAAAACATTCCTCAAACTATTAGAGAAAATATTTATGGTATTTCTAAATGCTTGAAAACTAATAAATATTTAAGTATGTCATCTATGGTGGAAGGAAAAAGAAATTAATTTCCAATTATATCAGAATAAAATCAATAAGCAAACACTTATCAAAGGCTGGGAGAGGGGTCTTAATCATGTAACTAGCCCAAGTAATTACCTCTTATTGCATAGGTATATTTTTGCTACCCACAACACTTGTGATGAGATTTAAGGGATGTTGAACTCCTTGTGGTGTGTCTCTAACAAAAACACAGGGAAGAGGGAACTATTGGCTCAGTTGGGAAAAATTAACAATGATAAAGGAGCATCGTGGTATGGGCTCTAGACATCTATATGGCTTTAATTTAGCCATGCTAGAGAAGCAGAGTTGAAAATTTGTTTTTGACCAGGACGCAATAGTGTCAGAGATTTTCGAATCTTAATATTTTTCTAAAGACGATTTTCCACAACAAGATTGAGAACGAATCAAATATCAATGTTTGAAAAGAACCTTGGTTGTGTAATACCAATGATCCATATGTTCAAAATGAGCCAATTAAAGGTTTAGAGGATTTAAAGGTAATGATGTGAGCTTATTTACAATGCAAGCAACATTTGAAAAAATGGTATAATTCAAGACAATTTTAATGCAAGAGATGATCAACTTAATTATTTTAATCTATGCTAATTCATATAGTGAGATTCATTATTATGAAGGCTAAGTAGAAATGGCTTAATTTTTCTTAGTGAAGTTCGCGTATTATTTTGTCATGCAGAAATTAATTGATAGTTCTAACCTCCGCATCCTAGGAGATTGGCAACAAGTCTGGAAACTCTATATTTCTCATAAAATAAAATAATTATGTGGAGAATATGTAATTGTTTTTCTACTAAGAGCATCTAGTAACTATGAGAAATGTTAAATTATATGTCCCAATTGCAACACCAATCCAAAATCATCTTGGCATGTGTATTTTGTCTGGAAGATTGCCATTAGTGCGAGGGAATATGATGCATGCTCGAGACATTAATATCAAATTGTATATTCTAGCTGTTGAGGACACTTGATGCTTATAAACAATAGTCATTTGGAAACTAAGGAACCAGAAGATATGGGGTGGGGTCCAACCAAGGAGTATATAATATATTGGAGGAATGCCCTAACTGCAAATGCCAAGTTGCATCTGTACAATTTGGCTCAATCTTTAGATTCAACCATTGCTTGGCCAACTTACATGCAATGCTCATGCATTAATATTTGAAGGATCCTCTTGCGTTCGTCATTCAGAGGACATTATGTAGCTCCACGTACCAGCTTTTTTAATGGGTCACGTGCGTTAATGAAAGCTATCAACTTTTTTAGACTAATTGCAAGCATATAATTGCCATCATCAACTCTCAACTTTGATTGACACATAAACTAGTTTCATCTTATCCAATTGTAAAATAAAGTTGTTACTCATCTTTAATTTTTGCTAATTCACATTATTTAAAAGTATATCTCAATATGTTTATTCTACTGATATTAATGAAATTACATGATCAATAAAAAATCATTGTTAAAATTTATATCCGTAACGAATTGTCGAATTTGTTTGCACGTTTGTGTGGATTTTTAGGGCATGGAATGTGAACTTAAAGGATGGGGGAGCAGATCAAAGTCAGTCAAGGTCGAAGCGTGATTTTGAGGTTTGAGAAAGTAGGGCGTGTTTGGACCTTTACACAAAATCATTAATGCTGTGGACGAAAAAAAAACAATGTTCGAATTTCCACGTTTGGCGAAAGATGGCATGGGGTTTATTGACAAAAGAAACTTGTGCAGTTAATTCATCTACCTAATTTGTTCTCCGAAATTAACTCATAATAAATGTAACAATTTTTTTTTTTCATTTTGAAATAAAAAGGGTTCAAATCTCTGGATCCTTCTTTAACGTATGTGTGATGTTGAACTTTCTTCTGCAAATAAATGTCTTCAACGATCAAATATATTGCTTGCTAGAATGGTAATCTAACAAGCCGTATATGTGGTTGACACCAAGCAATAGCAATACATTCAAGTTTTGTTAATGTGGAAACGATGATTCCACGTTTAGAGTCTTTAGACGTTGGAAATTATTTCAATTCAATTTTTTTTTTAAGACAATTAATTTTCATCCTAAAAAACAATTATTTTTCTTTTAAATTTTATACTAAAAACTGGAAACAATAACAAAAATATTCACTAATAATGTAAATAATTTTATAACATTAATATATTAAGAATTAATTTACTATTATTTTTAAAATAATTTTAATATAAATAAATTTATCATATATAATTTTTTTATTAAGTGACTATAGTCTTTTTTACATTCAATACCTAAAATAATTTACTCCACTATTTATCGATCATTGTGCAAGTTATATTACGTATGCATTTATTTTTTTACTTCAATGGGCTGATCAATGATCATGATGTCTCTGTACACAAGCTAGAAAAATGTCCTTTATAAAAGCCACACTTCGGAAAGCATAGTTCCAACGCGTTTATATTTAAAATTAGCTAAAAAAAGGATGTGATGAATCTCTAAACATGTGTTTTGACAATTTTCCCAAAATGTAATTTCTTCCATAACATAAATTATCGAAATAATTTTATTTCTCACAATGAAAACATTGTTATATATGAAAAAGTCAATAATATATTTTATTATTATTTAAATTTTTTTTATAATTATAAATTTTAAATACGTCACTTATTAACTATTACTTCTAATTTTATAATATTAAAAAGTCAAATGTGAATTAGAAAATATATTGTCAACACTTATCTATAAATATGTTCAGAAATCAAACTTTAGTTAAGTTAAAAAGAAGAAAAAATCAAACTTTACTCAATGTTTTTAAACAATTTAATCATTTATTTTTTTTTATAGACAAATAGATATTAGTGTATTAGTTTTGTTTGTGGAGAAATTTGAATCCATGACTTTTTCCTTTTCCATTTTCTTACATGCAAACTTTTATTACTAAATCAACCTTATAACTCCAATCATTTATTAATTATATAAAATTTCAGTAAAATCAATAATATTAGTTAGTCTTAACAAGCATTTGAAACAAAATTATTATTAATATTGCATAAACTTTGGGTTAAACCAAGTTATTTAATTTTTTTTATTTGCTAATAAAATTTGAAGTTAATGAAATAAACTAATACTATTTTATATTAGAATTTAACACCTATACACATGTAAAAAAGTTTTACACTGACGATTAATCACAACTCTTTGTTTATCCGGCTTTTAGAGTATCAATTGGTAAAGTTAACAAACTTATTATATATAAAGACGTTTAATTGATATACTTTTTACACTTATATTCAATCATAACTTTTCATTTATATGACTCTTAATTAGTAAAATCAAAATTAATGAAAGGTTGTAATTGAATGTACTATCAATATAAAACTTTTTACACTGATAATATATAAGTCTTTTTTCTCCTCATATTATCTTCCTCAAATTTTCAAGTATGGTTTTTAGTTTTGAATAAGTCAAATTATTGATTTAATTGTTACAACATTTCTCTTTGGATAATATTTTTTAAAAAATAAATAAACTTGACTTTTAAGAAAAAGTTTAATTAGTTTTACACTAACAAGTTTATTGACTTTATTTATTAATATATTAAAAGTGAAGAGTTGTAATTAAACTTCAATACATATTAATTAAACTCATTAAGAATATACACTAATAAAAAAATAAAAATATATACTAATTGAACTTCTGATAAAGAATGTACACTAATTGGAAAAAGACTAACTCATTATTTGTTTCGGTAGAAATGAAGTAGAAGAGATAAAAATAAGAAGGAAATATTAATTTTTTTATCTTTTTTCACAGAAAAATAAAAGAAAATTATTTTAAAAACATTCTCCTACCTTCTTCCCCTCCCCAAAGTCGAAATGAAATGGAAAGGAATCATCTTTTTCATTTCCTTTGATTTTAATACTGAGTTTATGATATAACCTTTCTAAAACTTTATAAATAATTTTTTAAAAATAATATTGGATTAAGAATTACTTTTTTTTAAAAATTGGCTTTAAAAACAAAGTTTAATGGATATAAACTGTTAGTATAAAAAATTTTTATTTATGTGACTTTTAAAATACTAATTTATAAAATCAACAAACTTACTATGACTAAAGGATTTTGATTGAATGTCAGTGTAAAAATTTTTACGCTAACAGTATATACTAATTAAAGTATTAAAAATATAAAAAAGATAATCGTGCACTATTATTCAATTACAAGTCCTCTTTTAAAACATCTTATAATAAAAATATCAAACATACCGCATATAAATCATTATAATTAAACAACGATATAAAATATTTTACAAGTCGGTACATCACCTATTCTTTTTCTTTTAAACTATAATAAAAATATTTTTATATTTTATTTTCAAATAAACAAGAGAAATTCCTCAATTTCCTTCTTATTTCTTTCCATCTAACCATAATTTTTTTCATTGTATTCCTCTCGAAAGAAAAGTATACCTCGTTCATTAGAATTTTTAAATTATGATATTGATAAACAATTTTGGTAACTTAAAAAAAAAAATCAAAACATGTAACTATTAAATCACTTACAATAAAAGAACAAACATATGCTTTAACTACGATTGTAAGATTTAGATATAATTATTTTTGTTTTAAATATTCAATACGCCAATTGGTATATATTATCAATAAAAACAAATTTCGTATACATTTATACGCAATATGAAGCAGAAGAGGCCACATCATTAAAACGTCACGTGAACAAAGCACGAAAGTGATTCAGGTTCCTAGTTCCTCTCTTCAATTTATGAGAATTATTTATTAAAATTAACAAAGAATAACGTAAGGTAAGAGCTAAGGTGATTTTGATAGTTCAACCATACCCTTTCAATGGACTTTTATCATTTTATACATGATGGTAGAAATTTAACATACCAGTCAGAGTCCCGCCTACATCTCATAAAAGTGTTACATTGTGCCCAAGCATTCACATTATGTAGGAAAAATATATACCTTCCAACTATATTAGAACAAAAAAATATATACCTTCAACTATGTTAGAATAATTGATACGGTACAAGCTGAGAAACGTTTCAACATCAGCAACCCAATATCCACTACAATTAACACGACAAACAAACACTATCCATCTAAAACACAAAATAAGCACCCCAACGTGAAGCAACAGCTGGATTCATAGCAGAGTATTGATACACGGGAACTAGAGATTTTGGCTTTCTTGGTGTCATCTCTGGAAGCTGAATATACCAGAAATCTTTTAAATTTTCGTCCTTACTGTTAAAATATTACTCCCTATATTTTCCAAACATGTAAATTTCAATCATCAAAAGATTGGTTCCTATTTTTTACAATGAACGAGCCTCGACAATTTTCATTTTAAGATACTTGTTCACGTGAGCAAATTCTAACGACTGAAAATAATAGGATGCTTATCCAAATATAAAAACTATAAGATCTAAATGGAAAAAGTATCTAAAACAATATCTTACTTATATTTAGTAGACATAAGATATAATTTGCTTTACATTTTACAGTCGTCTCGGCTGCTGGCACACAAAAAATTGTACAAGACTTCATTTCAAATTTATTTAATCTTAAACATCTATAGCAAATCACTGAAAAGAACTTACTAGTTTTAATCCACTAACACCATAAACAATTTTACACTATCAATGAACCATAAAATGCCACCTTTTAAAATGGGGTTTAAAGCTTTTACATGAAGCGGAGAATCTTAGTTATTACAATGAGGATGTTCCTTGTTTAATAAAAATTTCATAATTTCAATTGACTCAATTCATAAGATAAATACTTACGCTGACTGTTGGGTGCCAGTCTGTTGTATCAACTGAGAGTATATATATTCATCGACTCTCTGTTTTGCTAAAGCTACCTGTCACAATTTTCAAGTTTCAACAAAAAATCATAACAGCCCAAAACCAACAAACAAGGCTAGGAGCATAAAACAGTTTCAAATTTCAATTCCATGTCAGTAGCACTTTGCCTGTAATATAAAAACTCAAATTAAATTAGTATCTTTATCTCAGCTGAACAACCTATCCATTTTTGTTTCAAGGAAGACCCTAGGCCAGGAAAAGGAGGGATGGCATGGGAAAAGACACATTATTTGAAAAGTTCACATATTTTGAATTGTCTTGTCTGATGTTTATAGCACAAACAGACATTTCCAAATGTATGTGTTTCAAAAAGGATTAATAGTCTTCAAGATCAAGGATCAAGCCTAGCATCAAATTGTTTTCTCTTAAAAGAAGCTAGATCCGCTGCATGTAACACAAAATTGTTAACTATATGATTAATTTCATTCAATGAATGATTATTCATATGCACTAAAATAGACATTCATTTGAAAAGGCCAGAACTAAAACCATGCTGGGGTAGACAGGTACTAGCCATTTGTAAGATTAATTTAGTAGTATACAGTTGAATCTCAAATCCGTTCCCACAGTTCAGGCAAAAATGTCCAAGCCAGTAGCAACATGATAAAACACACCAGTTAAACAAACAAATAAATCACAACAACAACAATGACAATAACAAAAGATGTCTCAAAAACATCAAAAGTATATTGTTTCTTCTAGAAACATTATAAGGCTAAAATCAAAAAAAGAAAAGATCACCTGTTGAGCACTGCCACCGAATTGAATTTGTCTATGCTTCTGTTCTCCCTTACCACCATAAACCTACAACATTTTCCAATTGATGAAGATACAAATCAAATAAATATTAGTTCAGGGAATTTAAGTATGAAAAAATACAACCTACTATAATAATATAAAATAGAATTACCCAAACTGTAGAACTTACAAGAATATCATTATGTTAACAACATAATTTGATTTATCAATATGTCGGGCCAGATCAAGTGATCAAAGGGTTCAATACTAATCATTCAAGAAATGTAGAAATTATATGCTATTTAATAAAAAGCTAAATTTAGTATGAAAATCAAGAGCTTCCATACTAATGATCTAAAAAATGTAGAATCATCAACTTTCTAGGTATTTTGTTTACTAATGTATATATTTTACAACTTGTTTGGTCCATATATATACATGGAAACTAACGGTAGATCCAAAAAACCTTGTTTCTCACAAATAACGTAAAACACAATTCAGGCCTAGCATTGATGTAGGTGTCTGTCAATCTCCTACAATCTTGAGCCTTACATGGTATTAAATACAGAAAATGCACCAGTGACAATTAAACATGAATCCAACAAGCAACAACTATTGTAGGAGGAGACTGACTTTCTATTTTATGCACTCACATATTTAAGCTACTGTTGACCTTCAAGCCAGGAAGTTGTAGAAGACTAACCTTAATCATTGCTCCAGACTCATTTCTGATCCTCGAAATGTTTGAACCACAACGGCCAATCAACCCACCAACCATCGTTTCCGAAATCAGCATCTCGAATGTAACATAATCAACTGCAAGATTGGTTGTCCTAGAGATGAAGTGATTGTAAGACAATATTCAAAACATGATATAACTGTTAAATGGCAGCCAAACATTGTTCTGATATAGAAAACATTAAATAACCTGAAGCGGGGTCAAGATATGGTTGGGATGGTCGAATTGCAGCATAATTGTATGTTGGGCTAATTGAAATCACTTGTCTTGGTGGGTTTTCCCTATACAAATTTGAGTTGATATATAGATCAGGCTAAAGGATAAACTAATTTTCAATTGTAAATTACAGCCATGTTCAAAATTAATATATACACAGAAGTTCACAAGCAGACCTTAACTGACAACCTATCTCCTCCAAAGCCTTCATTACTGCAGGAATATCTCCTGATAACTAATTTCAGCAAGAATGTTGATTAAAATTCAGGTTTCAGGAGTAAATCTAAAGTAGCAACAAAAGAATGTGATGACAAGAACAGCAAAGGGAAGCATACAGAAATGCATAATTCAACCCCCTAAATCATCTTCATCATACTTGCTAAAGGAACTGTATCTCAAGGCTTATACATTAAATTAAAGCATAACAACAACAAAAAACAGCAAGAAAACATGATTCCATATTTTTTTTTAAAAATTACAAAAGGAAAAAAATATCAAATCTCCACTTTAGTTCGAAACATTTCTACAACTCCTCAAAGCCTTTTCATAATTCATATAATTCAAATTCAAAAGGCAACAGAAAAATTATTCCACGTTAATTTTAAAAAAGAAATGAAAATAGATTCTAATAACTTGACTCTTAAAATTCAGGAAAGTGCATCTAAAGTGTTATATGTACTTTTTACACTCTTTAATTGCCCTTTTGGCTGTTGGAAGGCATTTGGCATATGTATAGAGTATTAACAGACCAAGTTTTTTTCATCAGTTTCACCAACAAAAGGTAGAAAATTTATGAACATAAATTTTAGCAGCTTTGACGTGGATAAATGAGAAAATCATCTCCAGATTAAATAGCAAAAGGGTATGGTCTGTTTAATAAATACAATTTAGAACTATGATTTGAACATCACTGCATTAATACTTCACACACTAGCCAAAGAGTATATATACCATGCAAACATTATTATGTTAGCTCATCTGTACATTTAACCATTAAGAATTTGAAATAACAAACTAAAATACTTATCATCTTGGTTAAAATATTGACTTCAAAATAAATATGGTTAAAGCAACATTCATTGAGTCATTGATAAGAATGGTTAGAAAATAACCAAAATCCTTAATAGTAGAAATTGATGAATGATGAGTATCATTTTAGACATCTCACCTGTACTACTCTGTCAGATTCATGGGCAGAAGCACATAAAGGCAGTTGATTTGGTGCAAGAACAGTAATAGAGGCACCAGAAGAGTCCCTCAACTTCTCAATGTTTTGACCAGACATCCCAATTAATCCACCTGCCTGAGACCCTGCAATCAAAAGTCTTATCGTATTGGCAGCCACATGTCCTGCAGTAACTTTTGACGCATCAAGACTGCTATCATCTTCCTGTTATATGGAAGCATAACTATCAATGCCTCTCAAACCCAACAGATCCACATGATTATTAACATCAACACATGATAATCTCAAAAAGAGTGGTCTACAAAAAACTAAAATGACCACATGCCTTTCAGAGGTACAAGAAAACAAGCAGGTTAAGACCCCTAACCAGGTTCGTAATTAAACCAAGCATAAAAATATAAATAAATATTTGATTGGACATGGTATAGTATTTTAAAGCTAGAAAGTTTTGTGTTCATTGTGTATATTGTCAAATTCCTTTCAAGGATGCTTCCTAAAATTTGTTACATATTTCAACTTATTTCTAACCTGTTCAAACATCTACCAAAATGTTTCAATTTTTTTCTCAAAATAAATGAAAATATATAGAGGTAAGAATATATTAAAAGCATTGGTACTTCTCAAATTCTAAAGGTAGACAAACAATAAACCATATTATTTTAAAATAAAAAATAAACAAGGTCCAACATGATTTTAGAATAAATTATGAAATGGAATTATTAAAAAAACAGCAACGAAAAGTCACAACAATCATCAAAGCTTGTGTATAATTAAGCATATGACAGAAAGGATGTGAACAAAAATTGATTAGAAACATCCTACCTTTAAAATTAAATGAGCTATTTGTTCAAGAGCTTTCTCGGCATCAGTAACCTTTTCATCATTGTCCTTAGAACTAATAATGATAACACGCTCTTCATGTCTCTGGCCAAAAGGAAAACATGAGATCAGTCTTGGCCAGCACTAATTTGGCCAAAATAGTAACAGGACACATGTATCTTACTTTCAAATTTAAGCACTTCAACTGATAAATTAACCCTTCATTAATAGTCAGTAAAACTGAATGAAGTTTACAGCATTACACATTTGACAGATCAGGATTTATTTTCTGTTTTACATAAACATCAAATATACAACATTGAGCTAAGAATAAATATTTTTTTAATTTTTATGTACCTATTTAATGGTAGTTTCTGACTTTCTGTTGACAATAATAAATAATAATACAAAAACCCCCTTTCCTTTTTATATGGTATCAAAGCTCCAGAGTTTATCAGAGTCATGACAAAACAGTTTTGATAGGAGCCAACCAAGGCCTGGCATCCCTGGGAAAAATTATTGACAGCACTCTCAGGGTTGACCAAAGTCCTACCACCACTATAATGTAGAGTGATTCTTCATGATCTAATGCAATTGCAATCAACATTCTTCAATTAGCTGCTCACAAATGGAGTGGTAGAAAAACAACTGGAGTTGGCAGACTGTAATTTGTGATGGATGAAAAGGAATTCAGATATCTGAATGGCAAAGTTAAACAACTAACATTGGTGACCCAGAGGCCTTTTAAGGTAAGAAAGACACATTTAAACCTTCTAAATTTATATGTTTCGCCTCTGTTTCGACAACACGGAAATATCACCAAAGGATGACTCCAATAGCAATTTTCTATTAAGTAGATGACGTTGGATATCTATGCATAGATAGTTAGAACTTAGGATATCCTTATATCCTAACACAGTAGGGTATTAAGAAAAGGGTAATGTTTTTTATTTGTTTTCTAGTAGAAACAACAATAGCATTCAGAACATTCCAAACCAAAAAAGGAGGAAGGGGTGAACTTTATGTGGCAGTTCTACAAATATCTATCATCTGCACAATAAAACTCGAGTGCAATAGTCATCCCATCATTGTAGGGCATGAAGTCAAGAGTGGACATGCTTAAACTTTTATAATAGAAGAGAAAAACACATTCTGAGATTTTCTCAAAAACAGATGCAATTGCTTCTGATACGTGATTCCAAATCCAACCAAAGGGTAGAATAACACAACAAGCATTTGTAGCAACAACTGAATAACCAGTTAACCACTAAAAAGAATAGACTACTCGTACTTGTATCTTAAATAATTAATTTAACCCTTGACAAACCCTAAACCCAAATTAGATACTGTATAGTAGCTCTACCCAAAGTAGTTATCGATTCAATCCCCCCAAACGCCAAATTAGAAACGGTAATTACTGTATTATTGTACTTTAATATAATACAATAATTCAATACAGAACAACAGTTCTAAAGTCTAGCTCGTCTCCATTCCCTTGATTTTTCTTCTCTATCGGGCAGCTTCTGAACTACCAAACAGAAACCATGAAACGAAAACACCAGTCAACAAGCCCCAAATTAAATGCAGAGTATCAGTTGTAGCGATAATTTAGATTTAAACCCTCAAAAAATAAAATCACCTATTTTTTTTTAAAACCGTTTTCTCTTCTACCAAACAAAGTTGTTCCACGAATAAAAGGACTTACAGCGATGGCGTCAGCGATTTTGATGGTGGCTTTGGTATCTTCTCGAATCTTCTGTATGCGGCAGCCTTCCTTCCCGATGACCTTGCCGATCTGGCGTGAGGGCACGACGATCCTGAAAATGACGTCCTGGCCCTTGGCGCGCTTGGCTGCGGACTGCTCCAGAGCGGCGGCGGTGCCGGGAACCTCGTCGTCGCGGCGGCGCTTTCCGGAGGAGGGGTTGGCGGTGGGGTCGTGTACAGAAAAAGGAATCTGGAGCGGCATAGGGAGGGGCATCTGCATCTGCATCTGCATGGGTAGGGGCATGGCCATGGGCATCTGCATCTGCATCTGCATGTGGATGGGCATGGGGACCTGCATGGTGCCCATCGGGTTCTGCGGAGGGACCATGGGGTTTATCGGAATTTGACCTTGCTGCGACATCGCTGCTTCTTTCTTCTCTCCAAGAGAGGTATCGTAGTGGCAAAAAATTGCGGGTTTTCTTTGGGAGCAAATTATAGGGTTTTGTCACCTTCAATTACTGATTTGCCCTTTTTGTATTTTTGCTTTCAATTTTCAACTAACTCTTTGCTATACATACCACTTTGACTTGAGTTTAAGCCAAATTTGTAATTTTGTTTTCTCTTTAGATTTCTATTTCATAATATTATTGTTTTTTTTTAATCTTCAAATTTGTTCCTACAAGAGGATTTTCTCTAGGGAGCCTAAAGGTGACGGTGACATTTTAGAGATTAAGTCACTAGGGTTATTATGGGACTTTCTCTATTAAGCTTATTGATCATTAATGTGATTTTTAAATGTCCTTAAACTTTATTTTATTATGGTGTAATCCTTGTTGAATGCATAAAAGGAGGTTTTTGAGGTTGAGTTGACGTGGAGGAGGTTGGATTTGCAAGCTCCTGATTCTAAGCTTTAGGGTTATTCTCATGTAGTACATAAGTCCCTCGAGATTTGAGACATATGTGTTGAGATTGTGAGTTCTGGATGACGAGTAAGATGTACTTTTTAGTCTGGTAGTTGTTCACTTGTCCTTATTGTCGGGTGGTTATGGGTCTTTAGACATGTAGCTTTTGACTTCTAAGCATCATAGATGAATTGGGTTGTGGGTTTTATTTCGACAAGTTAGGTAATGAGGTGGGATGTGTGACCAATAGCGTGGTGCCATGTGTGCATAATTGTGATAATGATGATATTATGGAGTTTTGAATAAGGGGGACTTGTGATGACCCCTAACTGTTGGATGGTTCACAATGATTGAGTTTTAGTGGTTAGATGCAATGAATTGTCATCATTAATGTTTTCTCCACTAGGTTGGGTTGTGTGGTTTTCTAAGGGATCATTCGTCATCGGCTCTTGTTTCACTTATCATGTGCAACCTTGAGTACAAGGCACACTTTTGTGTAACCTTTCCTCGTATTGTTTCTAGTTGTGCCTTTGGGATGTCATTTGATTTTAAATGTGGGTTCTCGATGGTAGAGGGAGGCATTCCATGCTTCCTACTAAGGATTTTGAGATAGGGGAAAATGATTTTAGTGAGGAGGAGGTTTGTGAACAATCCTTTTACTTGTTGGAGGGAAAGAAAGATGAGGGCAATGCCTATTTCGTGTGTGGTTGATAGGAGACGAAAGGATGTGAGTGGTGATATTGTCGCGAAAAGTATTGTACCTGCTATCAATGTGAAGCCTTTAGGTGAAGCGCCTAAGAGGTGTGAGAGGAATAAGAGGAAAATTGACGTGCCTTCATTGACTACTCCTGTGTATACCTAGATTAGGAGTGATGTGTCTAAGTATTTGAGTAAGCTCTCAAATGCCAATGTGAAAAGGTTGCAAAAGATGACATTTATCTTTTTTCATGAGAAGGCTAATCTTTTAACCTTGTTCGATGTCCAAGTTAGTCTTTCAAAAAGGTCTTTCTAACAACCTTTTATGTATATGTATAAATGTTTCTTTCAACGTCTTGGGGTCACACTACATATTTTTGAGTTTAAGTGTGTTAATTTTTTAGTTATACAAATGTTGCTTCTTCCCAATTGCATTTGAACAACTAGCCTTCCTCAGGGCGTTGCAAATATCGTGTGTGTATCTTAGTATAGAGTTGCCTTTGGACAAATTCCTTCATTTTTACCAACTTAGGGTTAGGGATTCAATTTGTTGAATTTCTTTAAATAACATGAACAAGGGCACGTTTAGTCTTTTCTATCCTTCTTACAAAAGATTTAAGAGAAAGTTTGTTTGGATCAATGTTGGTCATCGTTCAACAATGTTTTCTTTGGGACTAGTGGAAAGGACAAGTTTTTGCTTTATGGGTAAAATGAGTTGAAAATTCAAAGAGACCAAAGGTCGAGCTCTTTTTGAGCAAGAGGTAACCAACGTGGAACACTTAACAATGTTACCTAGGCCTTTAGATGTTTAACTAGTGATAAGGCTCCCTCAATTGCTGGATTTGGAAGGGGATTTAAAAGTACATGTAGATAAAACATTTTTATGTTTTTCTCAATTTGTGGGTTAATGATCTTTGTGTGTTTGCAACTCTAATGGGGATGAATACCTGGAAGAGTCTAAAAAGTAAGTTTAACATTAGAGGTACCAGACCTCCACCTAAAGAGGTTGAGGTTGTAGAGCAAGAGCCACATCGTAAGAGAAGAAGGACAAAGGTTACTGTAATTGAGCTATTGTCGCCAACACATTTAGACGGTGCCAACAAGTAAGCATTCTTGCAAGTTATATGTTACTCTGGAGAAGGCAGCATCATGTTATGCTACTGTAACAAGTATTGGGGATCCAGGTGTTCCTTATGTAAATAAGAGATTGGTTCCGGCTAATGATGAGTCTCCTAAATATACCTTATGTCCCCTGAAACATTTGCAAAAATAGCATAGGGGAAGACAATTTATTGTTGCTTATACGCACAAGGATGTAGAGCCATTAAGACGTTTAAAACACATCTCAACTTTTAGCGACTTGACCTTTTCTAGAGCAGGAAGTTGATTGGTGTCAATTACTTTTATGTCGAATAGCATGTTGAAGTGTGACATTGCAATGTCGAAGAGGACGAGTCCGGTGGCAAGTTTGGATGCCATGGAAGTTCTCTTGGAGAGGTATCAATGTGCGATTTTGTATTGGAAATGCAAATGAAACATGTACACTGAGAAGGTGAGGAATGTTGACAAAGTCAACAAGCAACCACATACTGGGTTATAGGTAAGTTGAAAGAGATTTCACCAAGTTATGGCGACTTTTGTCACTGTGGTGAAGTGCATACATGATTTTGTTGATAAAACCTTGGTTTCATGGACAACAATGGCTTCAGAAGGCAATAATTAGGTTGCGCTCTTTGCTGCTGTTAATGTCAGTTGTTTTGACATCAACAAGATTGTGACAAAAGTGGTATTGGTTAATGAACACTCTGAGGATGAGGAGTGGTTTGTATTTTTATTTGCTTCAAATTATATAAAGTATGACAAGTATATATATGATGAAGTTAACTTATTGCTGAAATCGTATTTTATGTATAGTCTGTGTCGAGCTATTATTAACCCATAATCGTTGTTTAAATAACTAGTTCGTACTCGTCTTTTATGTTGGCTTGTACTCAACTTTTTGTAAAGTTAGTTTGTACTCAAATTTTTAAGTTAGTGTGTCTTTTATAAGGATATCTACGTTTTATTGATGAGGTGTTCAGCCCCTATCTCTTTTTTTTTCTTTTTTAAGAAAAATAGTACATGACTTCTAGTTTCCCTACCTGAAGTAATGCTTTAGATAAATGTTTTTTCAAGTATGTGGTGTCACTTTTTTCTTAAACTCTTGGAGCTTGTAGGCACCATTTTGGAGGTTGTCCATAGCTTGGAAATGACCTTGCCATAGGGCAACGAGCTTAGCTTGATGAGGTGGTTTATGGGCATCATCAATTACTCAATAGACTAGGTTACTTGATTGAAAAATTCTTGGTTTAAGTTTGGTGTTGTATCTTTAAGCTCTTAGCTTGCATGTGAGCTCTTTGACCTGTGCTATGTGCCTAACTTCATCAATGAGGTCAAAATTTGTCCTGAGTGAGACTTCATTGTCTTGTTGGTCCAAGTCAAACCTTCGCATGGTGACACAAATTAAAAAAAAAATCAAATCAGGAAATACAATGTCATGATTTTAAAATGGAAGGATAAAATGTTTAAAAAAATGAGATAAGAAGTATAATCAAGCCTTTTAAAATATAAAGATAAACAAACCACCGTTTTTATCCTAAAAGATGGAATTGGTGATAGTTAGGTTCTATCAATATTTGTTAAGAATAATATTAAAAATTGTAATTAAGATACATTAGATGACATTCTAACAATATTTTTACATATTTATTTTATTTTTATTTTTTATTTTTATTAATTAAAAATGCTAGAATTAAAAATAAATACTCTAAACAATGAATATCATTAATTTTATTTATCGGATAAAAAAACAATTATAAAATTATCTCAAAATCAAACTTTGTTGTACTTTGAAATCTTCCAAACATTCATCCATTATTGTGATTTATAATTTTACTTTTGTTAGTCAATATTTGAATATTGTTACTTTTTTACATTTGAGTGGTTTTGGTTTCTATATTTTTATATTGTTTCTACTTTATGACCACCAAGGTTTTAACTCTCTCTCCTGTTCATGGTTCCAAATCACTAGCGAGTTAGACTTCATTAAGGGTATTTACAAAGTTGGATTTGAACAAAGTGCGTGTTTAGATATATTTTAATATAATTGATTATGGCTAAAATGGATTTTGAGAAAATATAATTTTATGTTTAGATGTTTCTATAAACGTGAGTTAGGAATAAAATTCACTCTAAAATTTTTTATCTAATACAGAATATACTCCAAGTTGTTTCAATATATAATTAATTTTAAATTCGTAAATTCTTTTAAAAAGTGAAATTAAACATGTAAAAATTTATCGAAAACCATAAAGCAGGAATTAAATGGGACAAAAATCACTACTTATCAAAATCTATTGTTAGAATTATCACTATTTGTTATTACATTTTTGTTCCAGTTGTGTAAACAAATTAACGCAAATCGTAAAACTACGATATATATATATAACAATCATGATTGTCACATTTAGATTTAATTACATTATGCATTCTTCTGTTCTATTGACTTTATGTTTTTTAATATTTTGTTTTGTTTTTCTATTTTTAAATTATGATATTAGGTTTTTTAAATTTTAGAATTGTTGAGTTTGTTTTAAGGCATTAATGTATTGACTTTAACCGTAACAATAATTTAAATAATGGTGTAACAAACATAATTATGTGATTTGAAACTTGCTTAAACAACAATGAAATGATTATAAATAATTAAATAACATTCAATTTATAAAATTGTAACCTATGTAACAAGCGTAGAACCTTCTCATACAAATATTTGCTTGTCTTGCTTTTCCATAAAACCCACAAAAAAAAAATGTGCAATCTCAAATCAATCCAGCAAACTCAACTTGCTTTGGATTCGTGTAAACTACCACCCACATGCAACGCAACTCCATCTTCTGATGGGGGAGTCCACAAGACTTGCACAGTGTATAGAGGAACAAACTCCTTCGTACCATGTCACCAAACCCAACAATCCCCCAGAGTTGGCAGCAACATTGGCTCAATTTCCTTCAAGGCCTTTACAACAGAATTTGGTAAATGTGTGTGAAGCTTCTCCACTGCCCAGTTCAAAACATCCCAAACCTCAACAATGCTTCTACCAATGTCATGAACATCCACATAGAGGACCAACCTTTCTAATGGTTGTCTTAAGACCCACTAGCCCTCCCAAAAAGAGGTCTCACCATTGCCAACCTTAAATTTAAATCCATCTTGTATTGCCTCCGATGCCTGCTGAATAAACTTCTATATTAAAGAGCCATTATGACCAATTTGAACAAATAAGTGACTTTGTTGTAGATACTTAGCCTAGAACAGATAACTCTAGAGAATTCCAGATGGTTGAAGAACCTTCCACACCAATTTGCCAAGCATAGCTATATTATGCAACCTTGCTTGTCGCACCCTGAAGTCCCTTAGTTTTTTGGGTCACATAATATTTTTCCACCCCACCATATGCATGCCTTTCTCAGTGGTCCCCTTCCAAATGAACAAACGTATTATGCGATCAATATAATCACAATAGTACTCTGGAACCAGTGAATTTGCATGGCATATGAAGGTAAAACGACTATGACAACATTTGCCAACATAACTCTATCGGCTTTATTAAGCAAACGAACCTTCTAGGCAACCAACCCGCTTTTTACCTTTTCAAATAAATTATGAAAGTCTTGCTTCTTCACCCTCTATTGATACATTCTGAAACTCACATACTCATCCAATCATTTTGTGAACTAAATGTTCGTCAACTTACTAATCATCTCCTTCTGGCTAGGTTTAACTCCATGTGATGTTGGTATATGAGACTTTTTTAGACTAACCTTGAGATCTGACATGACACAAATGGAGCTAAGAACTTGCTACACTCCATGCACTTGTGCCTTGGAGGCCTTAACAAAGAATAACACGACGTTTGCAAAAAATAAATGGGACAGTTTTAGGTCATTCAAAGACAACTCGAATGGTTTCGAATTGCCCATCTCAACCACATGTTGCACCATAATCCCTAATCACTCCATGCATAACACAAAAGAAGATACAGTGAAATAGAGTCTCCTTGTCGTAACCCCTCATAAAACAAAATCTCTTCAAATAAAAGTTTCTAAGAGTTTCTCTCAAAAATTACCAATTCATTCTATCATATGTCTTTTCTAGATCTAGTTTTAAGTACTACACGTAATTGACTTTGTAAGTTTTATACAGGTGTCTTTAAGTTTTGTTTGAAGATTTATTCATTCATATAAAAAATTACAAATTATTAAATCTAGAAACTTATAAATAATTAAATATTTTTTAGGAAGATGACAATCTGATTTTCCTAATTAAATCTCTCAAAATTAAATTCACAAACAAACCTTTATACAACTTATTTTTAATTTAAAATTTATTTTGAAGTTAAGAAAAAAGTTAAAGTTTAAAAAATAAGTATTAGTTGTTTGTCAATATTTTTTAGCTTAAAAATTATTTTTAAGTTAAAATGATTGATAAATTATTTTCATTGTTTAATAAAAAATGTATTTATAAAACAAAAATTTATATTGTAAAATTTATTCATTCATATAAATTATCTTTAAATTTATATTGTTTGACTCTCCTTTTTAAAATTTAAACACAAATGTTAATTTTAACATTATTTTCAATTAGTGAAGCTAAACTATTTTAAAACTAAAATACCAAAACGTTCATCATATAAGAATGTTGTTGTAACATTCTTTTAAACTTAGGAGGGAGTTAGTGATTTAGCGCAGAAAAAATAGAATAATATATTAATTCATATAAAAATCTTAGTGTAACCTAGATAGTTTAGCATATTTGAATTATTTTGTGGAAAATTATATTAGGTATGTTGTATTAACATTAAACAACTTAAAGTTTGAATTATTTCATGGAAAATTATATTAGGTATGTCGTATTAACATTAAACAATTTAAAGATTTCATACAATACCCAGGAATCTTATATAAATTTCTAAATAGAAGAAGAACTACTAATATCGGATATTAGAAGACTTAGTTGTTGACATATATTAAAATACAGAAATAGAATCCAACTCAAGGATAGATTCTTTAAATCTTAGACAACTATACAACATAAGCTTTGTCTGAAAGAATTAGTTCTTACAAATATAGGAGGATAGAAGATTTTCACATTCCTGATAACACATACGAGATAATTCCTTTAATATTACAGCTCCTAAATCAACATGGAGACACATGTGCACATGAGATTAATTACTACAGGAGTCAGATCCCTAATTAGACATATAATTAATACGAGAACTTTGATAGTTTTATTTATATAGTAATTTTTGTGTAACCTAGATAGTTTAACTTATTTGAATTATTTTATGGAAAATTGTATTAAGTATGTAGTATTAACATTAAACAACTTAAAATTTGAATTATTTAATGAAAAATTATATTAGATATGTCGTATTAACATTAAACAACTTAAAAGACAAATCTATTTAAATGGTAACAAATTTGAAAAAACATATTTTTCAATCACCAAAACCCGTGATTGAAAAAACCGTAAAAGAAAAACTAAAAAAAAAATGCTGTGATTTAGTGTAGAAGTGTTTTTGTAATTTTGTTTGATTTTTAATTCGTATAAACAACACATGCACTGTAGTCAAAGTCAACAAAAGCAAAATTTTCGCATCAATGAGAAGTTGGAAACTCCCAGGAGAGCGTTGTTCCCTTCTCTCTATCCTCATAATAATCACTTCCTTGCACTATTGAAGACGCGCATTTTCTCTCCGGTTCTCGATTTCGTTCTGGCGGCGATTCGGCAATTATCAAACACGCCGCCATAATTTCACTGTCAAAACGACTTTCTCTTCCGAGTGTTCTTTTCGTGAACGACGGTGCGCTTCGGCTTTAACTAGCTGAACACGATTCGATTGGAATTTCTGCGAAATTGAAGAAAATGAACAGTTTTTCTATGGGCACTCCGTTTGCGAGTCCTCTAACTGGTTAAATTGAAGAATATAATATACAAATATATAGCATTTTCAATCTATTCTACTAGTAGTTCTATCGTGTACTCATTAATGCTAGGATGCCTGAAATTTTTAGCTTTAATTCTATCATTTTATTAATATATGAAAAGTGAGTGTTTGAATTAGCTTATTTTGAGGAAATAATCGTTTTTATTTTGCTATTGGTGGAAACTTCCTAAGAGAGTTTTTGAAAGACAAAAGAAAAACTAGGAGTAGTCTATAGTTAAACGTGCACTTGTGCTACTATTCAGTATTGAAGAGTTGTAGAATGTGCTACAATGATTGATTGAAGTTTCACTTGCACTTTACAGGTGATAAATTTCTGCATTCTTTGTATCAATGGCATTGAAGCATTGAATTATCTAGGGTTCTGTTTAGAGAGAACTGACATCAGAAGCTGGAATTTGTTGTTACTAATGGCTTCAACGGTGATTTTGCGAAATAGAAGGAACCTCTTCCCCAACCCTCTATGTAGACATCCTACCCGCATTGTTTTTGGATTCTCGAGTGTTGGGCATGCTCAGCCATTAGAATCTAGTGAATTACAAGGTTTGAGCCAGTTTCTCTTCTGCCCATCTTCAACTACTGAACGTGTACCAGAAAGAAATTTATTTCCTCTCAACAAAGATGATCAAGCAGCTTTGAGATTTATCACGCCAAGTTCCTTTAGAGTATCAAGTTTTGGATTTAGAACTGCCAAGATAGAGTTAGTTTATCTTTCAAGATTGGGGTGGTTATCCCAATGTACTCGTCATATTTCCATGTCTGCAGCTCATCAATCTGGATTTGGTAGCAGTAATAGGGGAAGTGAACAATCAGCTACTAAACAGAAGAAGGAAGCTTCACCAGAGGAATGTGATGAAGCTGTTGAAGGCTTGAGCACCATAAAAGCAAAAGCTAAGGCTAAACAACTGCAAGAAACACAGAAGAGTGATGGTTCTGTTATAAAGAAATTATGGGCGAAGATTTTAGGAATTGGTCCAGCTTTCAGAGCTATAATGGCAATGAGCAGGTTTAAAATTTGTTACCTCTTGTTTTTGTGCCTGTTACAACTTATCATAGCTACTGTAATCGTTGGATTGGTTAATTAGTTAGCTAACTGATTTGGCTTTTCCAATATTCTGTTATTTTGTGCTGGTTGATACTGTAATAGTGTGCATTCTAAATTTCTGTGTGAGACTTGTTTGATTTTCCATTAACTAGGGAAGACTGGGCAAAGAAGTTTAGTCACTGGTGGGATGAACTTAAGTCTACCCTGCAACACTACTGGTTTGGTACAAAACTACTTTGGGCTGATATTAGGATAAGCTCCAGATTATTGCTGAAACTTGCTGGTGGAAAGAGTCTTTCTAGAAGGGAGAGGCAGCAACTGACAAGGACAACGGCTGATATTTTCAGGCTAGTTCCATTCGCTGTATTTATCATAGTTCCATTCATGGAGTTATTGTTGCCAGTATTCCTTAAATTGTTTCCCAACATGCTGCCTTCCACTTTCCAGGACAAGATGAAAGAACAGGTGATTTTATTGTACTCATCAAACAATACATGCTTGACTACTGGTGTGCTTTATTATCACTCAATTTTGGGAAGGCTTAACTTGTAGGAGGCATTGAAAAGAAGGCTGAATGCAAGAATAGAATATGCTAAGTTTCTTCAAGATACTGTAAAAGAAATGGCAAAGGAGATTCAGAATTCACAAAGTGGAGAAATGAAGAAGACAGCAGAAGATCTTGATGAATTTATGAACAAGGTCAGTCATGCTTTTCATGATGTAGTTGTATACTTTAGACGTCCCCTTATATGTGCAATATTTGTATCATTGTCTGTATTTCTTATGTTATTAAAATAGGTCAGAACTGGTGCCCGAGTTTCTAATGATGAAATCTTAGGATTTGCCAAATTATTTAATGATGAGCTCACCCTTGATAACATTAGTAGGTTGGTGCTTCTATGTTCAGTTCGACCTTTCCTTACATTCAAAAAGTTGTGCCCTCCAGTTATTAATCTCGTATTTGGGATTCCACTATGATTATTAACATGCTTTTTGGTTGTGAAAATGGAGAACAGGCCTCGCTTGGTAAATATGTGTAAATATATGGGCATCAGTCCATATGGAACTGATGCATATTTGCGTTACATGCTCCGCAAAAGATTACAGGAGTAAGATTCATTTATTCATTTTTTCTGTTAAAACTTGGGTGTTTTATTTATGCATAGCTCATTGGCTTTTCCCTGGTAATTTTCTTTAGATAAGGATTTTTGTAATTTTGTAGGTTTATTATATTTTTGCACCGATATCTGGATGTCTGCCTCATTTTTCACTTCTTGGTTAGTCATAGTTCATAGTTCAATTGTAGGAAACAGAAGAATACATGGGGTTCTTATTTTATCTTACTTTGAGAAGGGACTAAAAGTGGTACATTGTTTCATAATGTTGTACCTTTCTGGCATCATTGGGGAGTATTTGGTTATAGCTAAGTTGACAGCTCTTGTGGAAGTTCAAAGGTTATTGATGTGGGAAAAAAGGTTATCTTTTTGGCATGGCGCTTTATGATAAATTTTACCCTTAGTGTGTTTGACTTTTTCAGAATATGTATTAGTATATGAACCTTCTTTTGCGGTTCAGATTAGTGGATGAACAAATCTTCTGTGCGCAACATATTTAGATTGCAACGCTTGTTTTCATTGAAAAGTGTAAGAATTTATATTCTAACTTCAAAACAAACAAGGCCTGAATATATTATAAATATAATTGATGTGAGCCCCACCATTTATGTTAGTGCTTCCCCTTTACGGTCTTTCTCTCTCTTACTTGGTCAATTATGATTTAGCAGAAACTCTAAATTCCCAATTTCAAAATTTCTCACTGATATTCCTAATTCCTTGTTTTACATTACCTTTCTTCTTAAAAGGTTCCTCTTGGTATTTCCTTCTTGTTGTTGCATGTCTGGTTGTCACACTTGATCATCCAGTGTGTCCTAGTATGTTGTGGATTGGTGGTTTAGGTGTGAGACCACCAGATACAGAGGTGATAGATCGCTTTGGGGACACATGTCAGTTCAGGTTTAGAGCTTCTCATCAAAGATTGATTGAGGCCCCTAGCAGAACTTAATAATTGACTGATTACTAAGAAGAAATGGATGGATCAGTTTTGGGTAGAATAGGATATTTTGAGGGAAGCGAAATGTGGCTCTATGTTTCCAACCTAGATTCAGAATGTATCTCTTGAGAAAGAGAACATCAAGAGAAAAGGAAAGATGGAAAGGATAAGAATTTGTGAATGGGGCAAATTAGCTCCATACCTGTCTATATATGTATTTTATGCTAATGAATTAAGGTCAAGTACATGTATAATACAACTTGAATGAGCTCTACCATACGATGTTCAATACAGGCTAACAAAATAATACTTTGCAACAAAATTAAAAAAAGTAGACATAAGCCCCTCCCCCCTACAAAAGAAGAATAGAAAAGGAAAAAAAGGAATATCAGCATAGCATGACACACCACACTTGAAGAATTATGTTTCCAAAACTACAGTATTTCTTTTACTAAATTTACCATATTCAGTCAATAACCTCATTAATGTTTTTGAGAACATTGTTTGCCTTTGGCAGGATCAAGAACGATGATAAAATGATTCAAGTTGAGGGTCTTGAGTCTCTTTCAGAAGCAGAGCTTCGTCAAGCTTGTAGAGATCGAGGATTACTTGGATTACTTTCAGAGGAAGAAATGAGGCAACAGGTTAATCATAAAGTCTCAGGAATTTGTGGCATTTAATTCTCTAATTATGTGTAGTTTACAATGTTGGCAATTTTCATGAACAAGAAACTGGTCATAATTCCTACTGTCAGAAGTCAGAACCTTTATCTTCCCATAGTTGCTATTTTTAGAACCTTTATCTTCTAATAATTGCTGGTTTAAGAACATCACAAACAAGTGAGCCTTTTTTCTCGACTACCCTAGGCGAGGTCAGCTATGTAGATCAACAAAACCTTAGCATTCTACTATGAAGCATGTTTATAGACAAATAATGGTAAAATTGTTGGTCCTTTTTACAAGGCATTCTACAATTTCTATAAATCATTCATTTTGTTTTCCTTATTTGATTCTAAAAATTGTTACTGTTTGTGTTTTTTAAGAGAATTTGAGAAGTCATTAATAAATGTTCCCTTTCACACCTTTTAAACTCTCAAATATTGTATCATTTATCAACTTTCAAGTGAATGTAAAATTGGTAAATTAATAATATTTTTTAAAAAACCAATAAAAATAACTAATATTAGTATATTACTTCTTTTATTGATATGTGTTATTTAGGTCTAAAGTGCCTTATAAAAAGGATAAGATGAAGTATATCTCAAACTAATCTCAACTCTCTAGATATTTGAATGCTATTGCATTGGATGCATATTGCAAAACATAAATAATGTCTCAAAAAAAACAGGTTGTTGGTGTAGCTCTTACATGCAAAAGGAATGAAAAAAGCTTCGACCAATGTTGATTGGGAAAAAAACTGTATTAGAATAGTTCATAAGATCTAGTATCTCCAAAATGAAAAGGCAGAAAAGAAAGTGAGCTTAGTTAACATTTATATAATAGGAAATTGGAAGACATTTCTTAATGCTGAATAAAAGCAGCCTTCATATGGTTGTATGGTTGAAACAAATCTTTCTGGGAGATGTCTATTTTTATATTTCTTTGCAGCTTAGGGACTGGCTGGATTTGTCTCTCAACCATTCTGTGCCATCTTCCCTCTTAATTCTTTCTAGGTATCTTAGTATTTTCCCTGTTGAAATGATATTATTTTAGGATTTTCTGGAATGGAGTGATCATATCATTCTCTCTGTAGAGCATTTTCTGTTTCAGGAAAGGTCAGACCAGAGGAAGCCGTTCAGGCTACACTCTCTTCTCTGCCAGATGAGGTTGTAGATACTGTTGGAATAACAACTTTGCCATCTGAGGATTCTATTTCAGAAAGGAAGAGGAAGTTGGAATATCTTGAAATGCAAGAGGAGTTAATCAAGGTTTGTTTTTTTTGCATTATGTATTTTGTTATTAGGGATATATATTTATATGAGAAGGGATTCAATTACTTCAAGAGGAAGTATAAGAGACTTACTCTTCGTTCTAATAATTCATTTTCATTAAATCTAATGGTTAAGGATAGTTATTTCATTACAACCATTAGATTTAAAGAAAATAAATTATGAGGATGAAAAATAAGTCTCTTATACTTACTCTTTAGACCCTTCCTTGTAATTTAAAAGAAGCCTTTTTAAAAATTATGTTTCATTTCAACATATCATTTTATGTTAAAAGCTTTGCTTTATTTATGTAATAATAAAAAGGGTATTTTTTTGTTTTGAGTTTGGAGTACATTGAAATCAATTGTAAGCGAAATTTTCAATGATTGACATCCATTTAACCTTGTATATGAACCACACCATATGTACCATTTTTTGTATACTTGTTGCTTTATTTTGAGATTGATGGGGGCAAAATATTTAATAGGAGGAGGAAAAGAAAGAGGAGGCGGAGCAGGCCAAAATGGTAAAATCAGTTGGTAATGAAGGGGATTTGGCTATGAAAGAGAGAGCTTCAACCACCAAACAAACAAAAGGAGAGGTAAAAACAAAGACATTGGATAAACAGGAACATCTCTGTGAGCTCAGCCGGGCATTAGCTGTTTTAGCATCAGCATCTGTAAGGAGTGGAAGTAAATTATTTTTACTTTGCCACACTAAATTTTTATCCACTGATGAATTCCTGGACTGATTCATTTGTCTGGTAATTTTTCAGTCTGTGAGCAGGGAACGTGAAGAGTTTTTGAGACTTGTTAGAAAGGAGGTATATGGATTTTAAAACTGTTGTCTCTGCGACTGAATATTGCTCAGTGAAGTCTTTCCAGACATGAAAAGAAAAGTCAAATTATAAATTTCTTTTGGATGTAATTTCATGTCTCTGCATTCACGTTATTTAACATTGATTTGTTAAAAAATTATTTGCTGGATAAAATAAATGCATTTCACCTGAAGCTTAGAATTTAACATTTATCATTATTTTTCCCGATAAAAACCAGTAATTAAAATTCAGTTATTAATCTTGTCATTATCATCATCTTTTTTGTGGTTTGATAAAAAAAGATTTCAAAATGATTTCTCTAGCTTTATACTGAGAGAGAGACTTTGCTGGATATGTTGGTCTCTGATATGATAGATTTACCTTCTCGCATCTGTGTTTATACATGTAAGATAAGGGATATGGGCATATAAGAGGATAAGCCCATATATGAAAAAGAAGTATACATTCATCGTAGCTAATCATAATGAAAAAAATTAATTACATTTTTTAACTGTAGTTTGTACTATGAAGTAATACAATTGTACCTACATTGGAGAAAGCAAGATTAAATTTGCTCGCTCCTGCTTATGAGATCTATGATTGCAATTGCTTTCCTCTGTGCTCTATTTGTTCCATTCTGTTTTATCTCCATTAAATACTCATACACTCCAAACTGAAGTGCTGCCAATATAAAGGACGATTTATTTGCACACAACTCAAGAAGAAAGATGTTGGTGTTGCACATTAATTGTTCTCGGGACTCCCTTCTCTCATGAACTCAACAAGGGTTTCAATGAAAGTAAGTTGTCCAATTCTCTTGTCTTGCTTCTGAATTTGATACAGAAGTAACAGAATGGAGAATGCTTCATCAATCAACAAAAACTTGGTCATCCAAGTTTTTGTCCTTGAGCAATTGAAGGGTGTTACAATACCAGCTCTAATAGCCCTACCTTTATTTGCCCGGCTGAGAGGTAAGTTAAAAAGAGCTGTAGCTGCATCTTTCTTCCTTTTGACTCTTCCATTTCTTAACAAATCTACCAAAGTCGAAGAACCCATGTGACTGACCTATTATCTTTTTAATCTCATCAAGCATTGACAAGCTGAATAAAGCTGCTACTGAGTTTTCCTTACCAACACAACTCCCATTTTCCAAAACTTCTACGATAGCTGGAATGGCACCTTCTTTGGATATAAGTCTCTTATTACCCTCATCAATTGATAAATTCAAAATTGCTGTCACAGCATGCTCCTGTATTTTCGGATCTGGATAGGACCGGAGATCTACTAGTGTTGGTCTCCAAGTTCAGCAACCAAAACCCTATTCTCAGGATTTTCTTTTGATATCATACACATCTTCTCTGCTCTTCTAAATGAAAAGATGATAGACTCAACCAAACCTGGAATTTCCTCTCTGTTGTCTATGGGACCACTTTCCTGACCTGAAGAATTATACTTTTTAGGAAGTTTGAACTTGTTCTTCTCACATCATTCTTCAATCAGGCTTTTCAAAGCATGGTTTGAAGCCAATGACAAGTGTTCCAAAGGTTGCCTAGTCTTTGGGCATGTGTTACGGTTGGATTCAAACCAGTTCTCTATGCTTTCCCTTTCATGTCTTTGATAATCACAAGAAAAAGAAAATTCGTGGCATAGAAAATAAGCATCTTATTTATTCATGGAACTAAGTCTACCTAACATTAGTTGCTAAAAGTTAAAACAACATGCATGATGCCTGTTCAACTAAGTACTTCTTTGGTTAAGCTTATTTTAAAGAAACAACCAGTTTCTTCTTTCTGTCAATTTCTTAAAATAGCTTTTAGAATAAGAAAAAAAATCTTCAAACATTGGTGTAGTTTCTTATTTGCAAAGATTCGAGGAGGAAAGGGTGAAAAATGGAAATTGAAACAGAAAACGTTTTGTTAACCCACTAGCTATTCCTATTCTTCATGTCAAGCTTTTTACTTACAAATCATTTCTAACCTACCACCGTACAGATGGACCTTTATGACAGTATGGTAGGGAAAGAAGGTACAGAAGATGAACAGGAGGCTAAGAAGGCCTATAAAGCTGCAAGGAAGGAAAGTGATGGTGCCATTGAGGCTGCCATTAGTGATAAAGTTTCTTCAGCACTTGTTGACAGGGTAAGTCAATGACCTTCTAGTTTCTTTTGATGCTAGCAGATCACCTTTTTTCTTTTTTTTTGCAATAGAAAGGAGCTAAAGTGCTCGCAGATCGTCTGTTAATCCATTAGCTGAATTATATTCTGAAACTGACAATACCTAACAACGTGAATTTCATATGCTTCTCAGGTTGATACTATGCTCCAGACACTTGAAAAAGAAATTGATGATGTTGATGCTAAAATTGGAGACCGTTGGCGGTTGCTAGACAGGTTTTTTCTTAGTGAATATTTGCTTGAGAGAGCATTATGTGCTATGGATAAATTGTTTTATTTCCTTTTCCTTATATATTTTTATGATTAATTGTTGGAAATAAATATCATTCAAATGTTAGTCATGTTCTGGCAGGGATTATGATGGGAAAGTGACAACCGAGGAGGTTGTATCCGCTGCTATCTATTTGAAGGACACCTTGGGCAAAGAAGGAATTCATGAACTTATCAGCAACCTCTCCAAGGATAGTGGTCAGTTCTTGTGTCATTTTCCTTTTTTTTCTCATACTGCCTCTGAAGTGTCCTCTCCTGTTAAAGCTATTAAAATTTTCTAATATAAAAGCTCAAAACATCAACTGATGCAACTTTGGTTTTCCTTTTTAGCATTTTTTTCTTTCTTTTTTTCTTTTCTTCCTTGCAAACGCTTTTAGCATCCATGTGGCAGATCATGAGAAAACCCTAACGATAGGCTATAGCTGACATTTATTATTTGTTACTATAAAAAATGGTGTATAACATGCATTATCTCCGTCCCATAACAAGTATAGTGTAAAAAGAAAAAAAAAAAAAGAGGCTCGAAACAAGTGTTATTTTAACTGTTCAATTTACTACATTAATTATTTTTCTTCATTTATACCTATAATATATCTTTTAGAATGTTGTTGTGCTTCATTTTTTCCAGCAAAGAAGTTAAGTGATAAGGTTAATTTCATATAATTGTTACATTATTTCATCTGTTTACTAGCTTCTCTTGAATTGTATTAGAAATTTAGGACAGTTGTTATGGGACAAAGGTAGTAATACATTATTAATACAACTAATAATCGAATAGCTATATGTCAACAACAGTCAGCTTCATTTGTCAAGGACAGTATCCAAAGCCATTTTCGGACTTCAATGGTAGATTTCTTCACAACTGGAAAACGACTAAACGAGTGTCATTCTGTAAACAAAATCAAACTTCATAACCTCCGTGATGATTGTTTGAATTAGCCCTTGTGATTACTATACAAGTTTCTTAAACGAGTACATGTTTGAACTTCCCCTTCGTTCTCGAAACAAATTTCTTCCTTGTATGCGTAGTTATTTATAATTCTTGAGAATTTTATTATTCGATATTACTTGTCATTGGTAATACCTAGACGGCTAAAATCAAGATGATCCAACATCTTAATTTAAAAATTATTTCAGATGCCGGATTAATTACTTTTTTATATTTTTTTAATTGTAACAGATGGGAAAATATTGGTGGAAGACATTGTGAAATTGGGCACCCAGAAGGAAGATGCTGAAACAGACGAAGTAGGAAGATCATAGTGTTTTATTGATGTGAGAACTCAGATTCTAGTGGAGTTCAACATCACTCTATCTAGGAAATTGTTTCGTTTTGCCATAATTTATTTGAAATGTAACCGTATAGAACGATTGTTGGTTTTCCGTAATGAATAATGTTCTCAGAGAAACCTCTGCCTCCCCAAAAAAGTAAAAACAAGCTAGGGGATCTTTTTCAATAAAAAGGTTTTGGAAAATACCAACACAGAAAATAAAATTACTAACGTGTCGATCTAGATTAGTATATTTGCCTTCCGAGAATTTCTCCCTACACTCTAATAAGTTCTCCCTACATCTTCATAATTTTTTAAAATGTAAAAAAAATCCTTAGTGAAAACAGTAAAAATTTAATTACCATACATTTTTTTCTTTTCTCTTCATCTACACCTCTTTTATTTTGCATGTCTCTCGTTTTGCATCTCTTGCACAACTTCGTTTTTCTTCTCACTGAATCAGTGATTTTTTCTTATGCGTTGTTGTTCATCTCTTTGTGTTTTCTTTGTTTTTTGTGGTTCAGCTTTATGTTTGTTTTGTTCTTTGTGGTTCAGCTTTATGTTTGCTTTGTTCTTCGTGGTTCAACTTTGTATTTATCTTCTCTCGGTACACTAGCTTTTTTTACAAGTCTGAACACCCCTGTCCAGACTGAGTCCAAAAACCCTTGTCCGGACTTGTAAGAAAATTTGCAAATTCTTTTTTACAAATTTGAACACCCCTATCCGGACTCGTAAAACAATTTACAATTTTTTTTACAAGTTTGGATACCCCTGTTTGGACTTGTAAAAAAATTTGCAAACTTTTTTTACAAATCCGAACACCCTTATCTGAACTGAGTCCAGAAACCCCTGTCCGGATTGAGTCCAGAAACCTCTGTCCGAACTTGTACAAAAATTTGCAAATTTATTTTTACAAATCCGGACACCCCTATTCGAACTTGTAAAAAAATCTGCAATTTTTTTACAAGTCCGAACACCCCTGTCCAGACTTCCTATCCGGACTTGTAAAAAAAATTTTAAACTTTTTTCTACAAATTCAGACACCCCTATTCGGACTGAGTTGGAAAACCCCTATTCGGGCTTATAAAAAAATTTGCAAATTTTTTTTTACAAATCCAGACACCCCTATGCGGACTTGTAAAAAAATCTGCAAATATTTTTACAAGTCTGGACACCCCTATGTTGACTTATAAAAAAAATTGTAAATTTTTTTTACAAGTCTGAACACCCCTGTCCAGACTTGTAAAAAATTTGCAAACTTTTTTTTACATATCCGGACACCCCTGTCCGGACTGAGTTTGGAAACCCCTATCCGGACTTGTAAAAAAATTTGCAAATTTTTTTTTACAAATTCGGATACCCCTATCCGGACTGAGTCTGAAAACCCCTATCCGAAGTTATAAAAAAATTTGCAAATTTTCTTTTACAAATTCAGATACCCCTATCCGGACTTGTAAAAATTCAGGACACCCCTATCCGGACTTATAAAAAAAATTGTAATTTTTTTTTACAAGTCTGAATACCTCTGTTCAAACTTGTATAAAAAATTGTTAACTTTTTTACAAATCCGGACACCCCTGTCCGAAATGAGTCCGAAAACCCCTATCCGCGCTTGTAAAAAAATTTGCAAATTTTTTTTTACAAATTTGGACACTCCTATCTGGACTTGTAAAAATATTATAATTTTTTTTACAATGTTCAGACTTGTAAAAAAATTTGCAAACTTTTTTTTACAAATTCGAATACCCCTGTCCGGAATGAGTCCGAAAACCCCTATCCGGACTTGTAAAAAAAATTGCAAATTTTTTTTACAAATCTGGACACCGCTATCCAGACTTGTAAAAAGATTATAAATTTTTTTACAAGTCCGGACACCCCTGTCCAGACTTGTAAAAAAATTTGCAAACTCTTTTTTACAAATTCGGACACCCCTGTTCGGACTTGTAAAAAAATTTGCAAATTTTTTTTTACAAATTCGGACACCCCTATCCGAACTTGTAACAAAATTTGCAAATTTTTTACTAGAATTAAATTTTTTTATCTAGAGTATTTGAGATTTTTCCTACCTTTATAAAGGTGTAGAGAGAAATTATAGAGGTGCAGGAAGAAATTCTCTTACCTTCCCTACAAATGTTTTGTTGCCCAAATCACGCTTAATGCCTATCCGTGATTCACATTTAAACCAGTCACTTGAGTAATTTTTATTTTTCACATTTAAAACATGGATTTGTGTTTAGGAAGGTTAAGGCCTAAGACAAACTTGTTTTATTTTATTAAATTTAACATAATTTAAAGTTACTTCATATAATATTAATGATCTAATATCCATCTCATATCATGTAAGCAAATATTAATAATTTTAATAGTAAATATATTTGACTATTTTGTATTATTTTTTATTTTATGATAATGATTTAGAATCTATACTTGTAATTAGTGATCTTCATGATTGATAGCATTAAAACTTAAATACATACTGAATGTTGTAGTGATTTATATTTTTGGAGTTCTGAGTATTAATTTTATCTTCTATTTGAACTTTTAAATTATTTATATAAATTATATTTAGTCATTTATCATGGTTCGGTGATAAAGTTTAAATTTGAAAAAAAGGGAGAAAAAGAGACTGTAAGTTCAAATTTCTTCATTGACAAAAAAGTAACACATTAATCATTAGAGAATTTCTCCCTACACTCCAATAAGTTCTCCATATACCTCTATAATTTCTCAAAATGACAAAAAAACCCTTAATGAAAACAGTAAAATTTAAATTACCACACACCTCTTTCTTTTCTCTTTCATCAGCATCTCTCTCGTTTCGCATCTCTCTCATTAGCTCATCTTGCACGACTTAGTTTTTTTTCTCACTAAATCAGTGATTTTCTCTTCTTCTTCGTGTGTTATTGTTTATTCCCTCTGTGTTTGTTTTGTTCTTCGTGATTCAGTTTTGCGTTTATCTTCTCTCGGTACATTAGCTTTTTTTACAAGTTTGGACACCCTTATCCGGACTTGTAAAATAATTTGCAAATTTTTTTACAAGTCCGGACTTGTAAAAATGTTTATAAATTTTATTTTACAATTGTTTTTTATAAGTCTGGATACCTCTGTCCTGACTGAGTCCGGAAACCCCTGTCCGGATTTGTAAAAAAATTTGCAAATTTTTTTTTTACAAATCCAGACACCTTTATCCGAACTTATAAAAAAATTTGCAATTTTTTTTACAAGTTCAAAAACCCCTGTCCGGACTTGTAAAAAAAATTGTAATTTTTTTTTACAAATTCGGACACCCCTATCCGGACTTGTAAAAAAATTTACAATTTTTTTTTCAAATCCAGACACCCGTATCTAGACTGAGTCCATAAACCCCTGTCCGGACTTGTAAAAAAATTTGCAAATTTTTTTTTAGAAATCTGAACTTGTAAAAAAATTTGCAATTTTTTTTACAAGTTTGAAAACCCCTTTCCGGATTGAGTCTGAACACCCGTGTCCGGATTGAGTTCGGAAACCCCTATCTGAACTTGTATAAAAATTTGCAATTTTTTTTTACAAATTTGGACACTCCTATCCGGAGTTGTAAAAAAAATTGTAATTTTTTTTTACTAAGATTATTTTTTTTTTACCTAGGGCGTTTGAGACTTTTCCTATCTTTATAGAGGTGTAGGGAGAAATTATGGAGGTACAGGGAGAAATTATTTAATAACTAACATTTGGTTATAAAAAAAACAATTTAGCACTTTATTATAAAGGCCAATAATATTGGGTTTTTTCTTTTTGCACCCATCATGTTTTTGTTTTGCACCCATAGAGAAATAGACAAATTTGTCCTTGTTTCTTCTTTATTATGTGAACCCCCTTTTTTCCTACTAGTGTGACTTCAACACCCCATTGGGACTTCTAAAGTGCACCTACAACTTCGAACCATCCCTTTTTTTAGCATTTTTTCTTCATCTTTAGACGTTGTAGTTTTGCAATTGGTAGAAGACATTTCGAAAGGTAAACTCTTTTTCATCTCATTTTTTATTGTTATGGATTATATGATTTGAAAAAAAAAAAAAACACACTGCAAATTATTAAATTCATAATATATGTAAATAATGATTGTGATGATGTAATTTATAATCATCAAAAGTATTATACGAATATGGTTGATTAATTTTGTTTTGTTATATATCAAATCATATAATAGATCTAGGTATTGATTTTGGGGAGATTTAAATAAGATATGAAAAATGGAGGCTACGAGGATTGGTTATTATTTACGACACTTGGTCGGAGTATAACGTGAAGGTTTAATAAATCAGTTGGTGGTTGACTAGGAGTACATAGGTGGGGTCTTTTAAAGGGCGACTAAGGGTACATAGCCCCCTAGCCACGAGTGCTTAAGAGTAAGAAGTAGTTTGAAGATAAAATGGTCATTCAGAGGCTACTAGGGATACAATAATCGTTTTTATCAAGTAACTTAAGCAATTTTTGGCATAATTATTTTTAATAACTTGTGAAAGTGACCCAAAGGCTTATTTATAGGATTAATTGATTAAGTCTCTTATGCATCAAAATAATTAAGCAACTTTGTCAAACATTGTCCCAAGGCTTATATGTGGAGCTCTGACCAAGCCTCATACGCATAAAAAATAATTAATTTTAATAAGTGTGACCCTAAGGCTTATCTGTGAGACCTAATGACTGACTCTCTTACGCATTAAGTAATTGAATATGGTCCTAAGGCTTATTTGTGGGACTTGGAATTTTTTTAGGTGTTGGGTCTAACTTGAAGTATCATTTAAGGCTTCCATCTCTGGGACTTGAGGATCAATGCTTATAGGATTGTGGCCATGAAAGGTTTAAAGTCTCTTAGTGGTTTGACTGTTTGGTACCCTTCCAAGCGCCATAGGTTAATGACTTGGGTGTGGATTTTCGCTTGGGTTGCATTGGCCTTTGGGTGACTTCTTGGTTTTCCCTACTTAGCTCTGCTAATTCGACCATAACTTGTTCCAGTAGGAATATTCATTGTTGTAATCAACATTTAATTGTTGGTGAATTACTCCTACCATTCTCTGAGTTAGGAGGGGTTGAGCGAGCAAAGCATAGGTAATGTGTTTATCGTAGCCCTACGGTGGGGGCTAAATGTTCTTGAATCCAAGTAAACCCTAATGATAAGTTGCCTAAACTGAGAACGTTAATATTTTGAAAGTGTGAATTTGTTGTCTCCTTTTGTGGGTGTTTAGGTATTTATAGGTATTGTTAGGCGTGAGTATCCTGAGGATGTAAGGATATAGGATATTCGAATTTGATGAGGTGATTGGAGATAGGGTTCTGTGAGATAATTATATAAAATATAGAGAACAACAATTACGTGATATTCAAATATGATGAATCGATTGAAGATATGAATCTGGAGAAGATTTGGATAAGATATAGAGAATGACAGTTACAAGATATTCAAATTCATTAGGTGATTAGGGATATAGATTTACATGAGATTTAGACAAGATACGAAGAATAATGGCTATAAGAGTTGTCATTATTGATGACACTTGTCAAGTATAGCTTTGAGAGTTTAATAGATCGGTTGACCAAAAGTATAAAGGTAGGGTCGTCCAGAGGATGACTAAGGTACAATGGCCAATCCTACTATTAGGACGTCTCAAATACATTTTGCAATGACTAAACTGAATTTTATTTTATGTTTGGTTTTTGTAAAACAGAAAATGCTACCTACATTTATTCTCAATTTGGGTTTGCTTCAAAAGTAATAAATGGATTGCTTCTTCGATCATCATTTTGTAAGTGAAAAGTTTATAAAAAACAGTAAAGGTTACATTTTGTTGTGGCCACTAATAAACTTTTTACGTGTAATTTTGTATAAATATGAAGTTTATGAATTGTTCTAGTGTAGGATTTATAGAGTTGTGGCTCAAAGCAAGAGAACAATAAAGGTGAGTTTCTCTTGTTGCCTGCCATATTTCTAATAGCAACTACTAATAATTTAAACTTACAAAAATGTTTGTCCACTTTTTAAACTCCTAAAAATATCTAATGTCATGCAAATCATGCATGTCATTCGTAAGTCTTCACGCAAGCTTCTTTCGCAGTTAATAAGCTTAGGAATTACAGATGAGTTGATTCCTTTATTAAATTTGGATTGCAATATTCCTTGTATATAGAAAAAAACATTTATATATTATTTGTGCAATAATTTTTATACTGACAGTTAATCATAATTTTTTGTATATGATAAATTTGTTAACTTTCTCAATTAATACTTGAAAAGTAATGTAAACGAAAGGTTGTGATTAACTACAAGTATAAAAATTTTTTACACTCACAGTGTATAGATATTAAACTTTTATATATATATATATATATATATATTAATGTTAATCCATGGTAATATATTACGAACATGATGGTTTGTATTAATTTTTTTTTCAAGCCTATGGACCAATTGGTTCATAGATATGTAATTTTTTTAAACTTATAAATAAACTAGTATGTAAGTATTAATTTTTTTTAAGCATACGGATTGATAGGTTTATAGGTGTGCAATTTATTTTTTTAATTCTACAGACCAATTGTAAGTAGATGTGCAATTCAAGAAAACAAATTACATACCTATTTCATAAGCTTAAATAAAAATTGCAAACTTGCATACCACCTCATCTCTAGGCTTAAAAAAATTGCACATTTATGAACTACCTTTTATGTTAAAATAAATTTTCTATGGACCACTTTGTCCATATTGATAAAAAATATGATTTACGAACCACTTGGTCCAATCATAAGTTATGTATGTTTTTACAATAGTAATCATAATTTTAATAAAAATTTAAAGTTTTACAATTTTATATTGAAAAATTTTACTAAAATTTTATATTTTTAAAGTTTACTAATATAATTTGTTTATAATATAATATTTTAAAATTTTATGAAAGTTTATATGTAAAAAAAAAAGTGTATTAATACAAACCAAGTGGTTTGTAGGTATTTATAATTTTATATTTTAAATTTTTTATTGTAAATATTAAAATTTGAATATAGTATTTATATTTTTAAAATTTTATTAGTATTTATATTTTTAAAATTTTATTAATATTTACATATTTTAAAATACTTTTAGGGTGTATTTTACAAAACTAACTGAAAGCTAATCGAAAGTTGAAACACTAGTTATAAGTGTTTGGTAAAACTAGTTGATGAAGTAACTGAAAGTTGTAAAATGACAAACAATGACATAATTAATCCAACAATAAGGTATTTAAAATAAATATAATATATTTTAATAATATAAATTAATTACATATTTAAATTTTAAATTGTTATAATTATATATTTAAATTATAAATTTATATAATTAGATATTTAAATTATAAATTAATGTAATTACATATTTAAATTATAAATTATTATAATGATATGTTTAAATTGTAATTTTCTATATTAAAAAAATTTAAATTACATATTTAAATTATAATTTTTATACTTATATATTTATAAATTATTATAATTACATTAATGAAGAATGGAGAAATTAATGAGAGATAAATTGTATCATGTGAAGAAAGATAATTAGTGGAGGCAATACATTAACCAGTCACAAAAGAAAATAAGTAAGCAACTGAAAATAAAAAATATTTTGAAAAAAATACTTGAAGTAGTTTTTTTTAAAAAAAAAAAACCAAGTAACTCTAAATAAAGCTGAAACCATTTCGACTCACTAAAACGAAAAACCAAATACACTTTTAATCAATATCATTTAAACAATTAATTTCATCTGTTATCCAAAAAAAATCATCAACAAACTTTTAAATTAAAAAATATCTAAAAATAAATAATATCATTTCAATACATTGTTCTTTTTATCTAATTTGTGTTTTCAATGTATTTTCTTTTAAATTTAAGTTCACCAACTTTGATCCAATCATGTATCTCTTGCTGTATAAAAATCCAAGTACAATTTTTTGTCAAGTAATAAAAGTATTTCCATATGAACCACATTTTTTTATTTAGATAACTTTTTTATTTTTCAATAGATTTTTTTTACCATAAATTAATTACTAATCTCTTAAAAATCGAGACATTAAGAAATTAGGAATTTATTTTTTTATTTACAAAAATTAGATATAAATACATGTTTTTTATCACATATTTAAGTAGTATGATTATTTACTATTTTTTTTACAAGATATAAAAAAGGAAACCAAATAAAAAGTGAGAAACTACAAACAAGATTGAGAAAAGACAATATGCATTACTCAACTAGAGAAGAAAGAGGAACCCTGCAGGAGCATGCTGAAGGAACACCAAAAATTGAGTTAAGGAGGAACCCAACTTTGCTAGCATGCTAGAGCAATATTGTTCCCCTCTCTTAACAGGTTAGAAACAAAACAACTCCAATCTCTACTAGGCAGACTTCAAATAGAAAACACTTTACTGTCACAAAAGTGGTGGCTGGGAACTTCTTCCTTTATCATAATGATTGCGTTTAGCAAGTTTGAAAAACAGATAATGTGTCTATGGTCCTATTCCCAACAAAGCTAATACCATGGAACAAAACTAGAATCTCAGCTTGTAAAATGGGAACAATGGAACATCCCTAACATAACCATAGAAACCAAAAATGAAACCTCCATGGGCATCCCTACCAAGGTCACCACCGTCAACTCTCCTAATAAAGGTAACACTCCCATCAAAATTAAGGCAAAGGGTTCCCTTGGACGGGCAAGTCTAGGAGACCTCTACTAATAAACAAAGGGGATGCATAAGAGAAGTAAAGGTTTCACGAATGAAGCCAATTGAAGCTATAATTTTCTCCTTGAGGCTACCTATCAGTGTCTCCTTATGATGAAAGATCAAATTATTTCGCTTACACCAGATTCTCCACATGACTGTGGGAATAAGCACAACATGAGCTAAAGTGTGATGATCATCCATTGGGCTATATCATGGTCTAAAAAGGGGAAATTATGGATACCAAGTCCACATGCTTTCTAACCTTCGTTACCATCAGGGCAAAGGAAAAAGCAATGTAAAATGGATTTTTCACAATTTTCATATCGCGGGTAGGCAGATTTAGTAACAATATGCCTCTCAAGGAGGATTTTTCTAACAGGAATAACTTTGTGGCAAACCTGCCAAATGAAAAAACTGGGTGGTTGCAGGAACCTCAAGCTTCCAAATCCAATTCCAACACCCCTTCCAATTCTACTCACTATCCTTCCTGCTTAACTAGCTATAACTCGATATGGTAGTGTAGCAGTCATTCATGTTATCCTTCCAAATCCGTTGACCAGGAATGCCTGGGACTAACCGGGGACTTATGCACTTAACCAGGTGCACCGTATGCTTAAGCAACTGTTGAAATAAGCAGGATAGGTTCCAACCTTCTGTGGACCACAAATCCTTAACCTACATATCTATATAATGGATGTCAATCCAAGGGACTTGTTTGCCAATAGGTTCCTTAGAGGCCTAAGCTTTATGCCATAAAATCACTCTCCCTTCACCCAACTTGAAAGAAAAATCCATCTCAGGGCCTCCATTGTTTTAATATTTGCTCTCCACATGGTAAACCCCTTTACATGCATAACTTCAAACATTGACTTACCCTGCGTATAAAACCCCTACAAAATAGAAATCATAACACATTTTTGGACAAATTCAAGTCACAAACAAGCTTCCTTAGAGGGATATATTATGAACTTGACGAATGCCAAACCCACATTTCTTTCAGTGACAACTAACTTGGTCTTACACTACCCAGTGAATGCCTTTGTTACTAGAACCTTCCAAATGAACATGCACTCCTATAGGAATTCATTGAACTTGCATGGTATGCATGTGCATAAAGGAAAGAACTAACCTCGCGAGGAACACTTGTCGATCTTTGTTGAGGAGTTTTCTTTTCCAATTTGCCAATTTGCGATTCATTTCTCCATGGTGTCTTTGAAATCAACCTTGGTGACTTTCCCCTAGGCCAATTTGGAACCCAAATACTTGCCCAAGTCTCCAGTATATGAGATACCTATTATATCTTTAATGGCATTCTTGACTTGGCTTGGAACTTGTTAGAGATTAAGGCTTTGGACTTCTCCATGCTAATTTTCATGCCTGACATATCATAAGAACTTCTAAGGAACATGTCCACCATAGCCACTTTGTAAGACTTCATGCCTTTTCAACGCCTATTAGACCTCATCCCTCAGAACAAGGTTTCCTAGCACCTTATATACCTCAACCAAAAGTTGGGATGACTAAGGTGAAACCTAAGCCCATAAAACCGTGACGACGTTAGTGCAAAACAACTCCTTAAAGTATTTGATAGCTTATTCCTTCAACAACTCAACATTATTTTACCAAATGCCATTAAGGAGGTGCAAGCCATGAATCTTGTTATGTTTGCACCCACTTAGTGTTTATGCATGAAAGAAAGTTGTGTTGTGGCTACTAAAGTAAATCCATGCCCCCCTAAATTTACCAATCTACTCATAGTAATACTTACCAATTATTTAATTTTAATAACAACAAACAATTTATAAAAGATTAAGAATTAAACCTAGAAAGATTTAGTACTTTTCATATATAGTAATTATGGAGATAAAATTAAAAGAAATAAAAAAGAATGAATTAAGATAATTTTTAAATTTAATTTGTTTTTAAAACACAAAAGATTCTTATTCAATTAATTTACTAATTCAAGAAGACTATTCTTAATTATCTAATTGAATTTGTCTGCTCATAAAAAAAAATCTTATCGAATTTATCCTATTGGAGTGGATTTCCGTTCAATTAGATCCTTTCACCTTTTATTAATTAATTTTTTCTAGATAAAACCTATCACACTTTTGTGAATGCCTAAATTCATATCTTATAATTCCAATATACTAAGTTAAACTCTTAATCCATCTCCATGTGTCTAGAGCCAAACAAACAAGATTAAATGCTTGAAAAAATCCGTGATAAAAGACTTGTAAATTTAAATTTCGAAAGGTTAACTCAATAAAAAAAAAAAACACCACTGACCACTATTAAATATTTCTACTAACATTTTTAAAATATTTGTTATCATTAATTAAGAATATAATGGCAAAATTGTCATTTGAAATTAAGATTTTATGCATATTATTTCAATATAATGTTTCTCACATATGTATCCCAAAAGAACAATAGTATTATTTTAAGTGTATTCTAGATTAAGTGTGAGCATTTCTTTCAATAAAATTTAAATTTTTATTCACAAATTTATGAAAAATTAACTCCATCCACTGGATAAAAACTCCATCAGTAATATACATATTTCTTTACTTATTATCTGTATTTTACACTATAACTTATTTTTGATAAAAAGGAATGGAGTAACAATTTTTTAATAAATTAGATCATTGTAATTTATTATAAAAAACATAATTTTTTTGCATAAATGCACAAAAAATTAGAAAAAAGAATTAAACAAAACTTGCTTTAAGAAATACAATGATAGGTTTGTCATATAATCATTCACATTAATTCAAAGAGAATTAGTTAGCTGATATATCGTGTATAAAACAAAAGCTAGCTAATATATTTTAAAAAAATAAAAAAATGTTTTTTAAGAAAATGCAGTTATTTATATGTTTTTCCGCACGTTCTTGTAAGTTTGCCCCCTTAGAAACGAGTCTCAACAACATAATATATACATATATATATATATATATATATATATATATATATATATATATATTTTCCCCAGTGGAACGTTAAGATGAGAATGGCAACAAGTGGCCCTGGATCAGAATTCCGAGTAAGCGGGGCTAAATCACTAACAATAGTCATAAAGTAAAAAAAAAAAAGCACGTATGAAAAAAATAAAATAAAATAAAATTAGACTTCTAAGTTGAATAAATAATAATTTATTAATGCATCAACTAATATAAATTAAATAAAATTAGTTTAATTATATAAATGTAGGAAAAAAATATAAATTAATCAAGAATGAAGACTCAAATATATAAACTTAAGACTCAAATATATAAACTTAAGGTGCAGAATTTAAAAATATAAAGAAAGAAAAGTAGAGGTTTAAATATATAAAATTTAAAAGATAAAATATTAACATATTAAATATTTATATATAATGTTTTAAAATTGAGGTGTACATGTATGCTTTTATATATAATATTTAAGAATATTTGAGAATTCTTTATAAAGTCAAGATAACACTTTTTTTTTAACTAATCATGTTTTTTATTAAAAATATATAAAAATATACAAATAAAATTTCAGTATAAACAAAATTTACGAAAATTTAATTTTTTAAGTAAAATTTTAAATTAAAACACAAATTACAAATAATATCATCAAATGTCTAGGTACATGACTTACTATTAAAATATTTTATTATTTTAGTCATTTACAGATATTTAATTTGAATGGATATCCAATTTAAACATCTTCTAATCCTCCTGTGAATTTTTTTCCGTCAATAATAATGGACGAAGATAGTTTGGTCATATCTAATTCACGTGAATTTTTTATAAATATATTATAAGGCTCCATATTTGTTTAAATCACATTCAAAAGCGAAAATTAATATTTAATCCCCTCCTATGTCAAGAAAAAGAAAAAATCATACCGAAGAAACAACAATAATTTGTTTAATGAAACAGAAGCCGTATCTCTTAAAACAAAAAAAGCATTATTATTGTTATTATTATTATTATTATTAACGAAAGTGTAGCAAACGTGCAGATTTGTCTTGGCCTCAGCTTTTAACCAATCAGACACGGACACCGCAACATGTGAATTTGTAATTAGATTGATGTTAGTTTCAGCATATATTATGACCATACCATACCATACACTTATATTTATTTATTGACTTGCCATTTTATTTCGTAAATTAAACCCAAACGAAACGAAACCAAATCTGGTTTTTGGCAACACAGAAAAATCGCTCTCGTCTCTGTTCAAATTTCAATTTCAAAATCAGTATTACCTCCAAACTCTGTCGATTTTCGTTTCCAATTTTCAATTCCTACCTTTCTTTCGTCACACGCTGTTCGAACTACCTCACCCACTAACCCAGCACCTAGGGTTTCCTTTTTCACTTCCAAGCCATGCTCGACGACGATTTTTCTCTCGCTCCGCGTTTTGTCGATCCAAAGACAACCTTTTTGTGAGTTTTCGTTTGGTTTCCCGACGCGGATTGATTGCTTGCTTGCGTTCCCACGCGATTGGGGGAGTCGTGTTGTGTTTGTTGACCGAGGAGGTGCTATTAGGGTTTGCAGTAGGGAATTATCGGCACGGGTTTTGTGATGGGGATTTAGGTTTGGGCAACTCTCGTGTTGATTTTGGAGTCGAGAATTTGAGAAGTGAAGAAGAGGGATGTTTTACTCTCAGTTTATTTTGGCCAAAAAAGGGCCACTCGGGACCATATGGATAGCTGCACATTTGGAGAGGAAGCTACGCAAGAATCAGGTGGCAGATACCGACATTGGCGTCTCCGTAGGTGCGTTTTATTTGTTTCGTACCTTTTGATTTGCGTTTTTAATGCGCGGAGAAGTTGTGTTTGTTAGTTAGGCGTGTAATTTATGATTGCAATTGTTGTGTTTTGTTAGTTAACAGTGTGTATATTGCAATTAATGTTTTCGAAGTCTTTGCTTTAAGAAGGATGTAACAGTTTGTTTTCTTGTTTCCTGATCTGATTACTCCGTGGGATTAAATTATTGTGGGTTTAATTTTTGAATACTTATTAGTTATTAGTTACAGTCAAGCAGATTATGCAGTGATGGGCTTGCTGGAATGTGAAATCTTTCTCCGTTAATTCAAAGAGCTAGTGCTATGGCAGTGTCACTAACTCCGAGCTTTGTTGGGTTGGGTTGGGTTGTACCAATAGACTAACTAAAACTAGAGCTACTGCTTAAACTTGAATTATGCTTAGGGTAACAGGTAATGCCTTTAGTGAGATTTGAGAGTGGTAAGGAGGGTAGTGATTAGGCAAGTGGATTCTGTGTAGTTCTTACTTATTGGTCTAAGTGGGGTATTTTTTGAAGATTTCTTGGGCATGTTTTTCTCATGTTCCATGTTTTTGGAGTTTTTATTTTTTTATCAGCCATGTTGTGCTTTTCTCATATCAACTTTTGTCGGGAGTTGTTGTGTGTTTGCAGAAAAAGTAGAAGGATCTGTTGGTTATTGATGTATTGTTTTCTCTGTTGAGTTTGTTCAATCTTAAGAGAATGCTTTATATTCTTTTAAGGGAAAATAATTTAGTATTTTTTCCTAGGAATTCTAAATATTACATTTTCTGCGATGTAGAGGAGTAAAAAACAATGGTAGTTATGAGAATGAGACCAAATTAGACTGACGAATGGAATGGCATATTATAGACTGAAGCTAAGGGCAACTTTAGTAGGGGATCTTAGGGTGGTTCTTAACCATAAGAACCATTCTTCACAAGAACCACTGTTGCAGGAGGACACCGGTTCTCCTCAGTGGAAGAACTGTACTTCCTGTCAAACTGGCTTTTTATTTAAAATGTGGGTCCATTATGAAATGATTAAAAATAAGTTAAGAACTCAAATGAGTTCTATCATTGGAGTAAAAAATTATAAGAACTCTCTGACCTCATGTGGCATTAGGGGACCAACAACAAATACTCTAAGAACTCATAAATGAGTTTGCCATTGTGGATATTCTAAGAATGGGTCAGAATTATTTTGAATAAACAACTTAATTAAGTGCTTGTTGAATAAGCTGCTATGACATGAGGTCTTTTGCCAATTTTACCTTGAAACTTACTGGAATAAGCTGAAAAGATCTTATTTTGATAAGCTACATAAAAAAGCTTACTGAAATAAGCTGAAAAGAACTTGAGAGTCATAAATAAATTATTCTCATAAGCTTAATAAGCTCCCTAGTCCCTATAAACTCTTCAGAAGGTCATCTTTATGTACTAGTAATTAGAAAACTCTGGGAAAAAAAGCCATATTATAAGCTGTTTAGCTAGAAAGAGCACTCTTAGAAGAGGGTGAAATGACTTATTGAAAAAGGAGCATGGACAATATGGAGGACTTGTGGGACTGTACTGAGGACTTACTGATCCTATTAGGCTAGCATGAGGACTGTCTGCCACTGTTAATGCCATTTAGTGACCATGGTAGCTGTCTGAACTTGATTTAGTTATTTCTTTTAAGTGTTGGAATCATTCTTATGGTCTGTTTCTCTTTAAATCCTCATATCCATGCTATGAATACTCTTAGATATACCATTCTTTATGAAATTGGGAAACCAATTGGGGGAATTTTGGAAGAAGACTCAGCTAGAGTGGTTTGATGTATTCCTCCTGGTTATCATTCCCCTAAAAATCAAGGATGCTGTACCTTCCATTGGAAGTTTGCTTATATTTTTCTTATTCATCTTCTAGCTGTATATATGGGAAAATGTATTTTTAGTTCCTATGTTTTGTCAAATGTGGTCAAGGTCCTTGTACTTTGTAGTTTGTATCCATGAATTTGGTTCTCATACTTTAAAAAAACATATGAATTTAGTCTCTATTTTATTTTATTTTCATCAATAATCCATTAGGGGCAAAATCGTCCAATATGTTTTTTAAAGTTTGATGTCTTAATATACTTGCATTTCTTTCAAAATATTCCAAAGAACAGCCTGGGTTGCTCATGGCCATAGTTTTTTCACCTCCTCAGTCCAAATTAAATTCTTGAAGTTGATTGTAAGAAATTGATGTTGAGTGAAAGAGACCCAGCTTTCAGCAATTCCTTAAAATATTATTTCCCAGATGAATCTATCTCTAGGGGAGTGTAAAACAAATCCAAGCAACTGTTTTTCTTCTCTTCAACATCTTAATGAAATTATTCTTTTAGGAAAAGTAATAATCATATGATAATAATAAAGAAAAATAAAGCAGTCTTGTTAAAAGAAAGAGTTAACCTTGGTTTGAATGTTTCTTAGTGGATATGCTTCATGTGAGTTATTTTGAGGTTGGAAAATATGAGAGGAGGATTAGTTATTAGTTATATAGCTATATATGTGAATGAGTGAGGACTATCCTATACTTGCTTGAAATAATTGAAATTGCATAGATTTTGTTTTGATGTATGAAAAGGGAAATTAATATTCCATTGTACGTTGTATGTAAAACAGTGAAAGTGCTGCATTTGATGCTGTCTAATTTTGATCATATTTTTTCATCTCATTATTTATTCATTCAATTTCTGAATGAACAGATTCCATTCTTTTTCCTGAAGTACCAATTGCACTTCGCTTATCTAGCCATCTTCTGCTTGGTGTGGTGAGGATATATTCTAGAAAGGTGAATTACCTTTTTGATGACTGCAGTGAAGCCCTGCTTAAGGTTAAGCAAGCTTTTCGCTCCGCAGCTGTTGATTTACCTCCTGAAGAGTCCACTGCACCTTACCATTCCATCACTTTACCTGAAACTTTTGATCTTGATGATTTTGAACTGCCAGATAATGACATTCTTCAAGGGTTAGCTCCTTAATACTTCTTTATAATATATAACCATTCGTAGCTTTAGCTATTGCTTACTGCAATGACATTTTTACTTAAGTTGGTTTTTATTTAATTTAATTTTTTCATTTTTTTTGAAACCATCTTTCTGTGATTTTATCTAATGTTATGATCAGCTTTTTCTTTGGTATTTTCAGATGACTGATGTCCAATACAAATTTTTATAACGATGCCAAAATTTTTAAGTTGCTGATATTTTATTTGGTTGTGCTTTTTCAGAATTGCTCTATATTCTAAATGGTGATTTTATGTAAGATGGTTCGTGTGAAGGATAGATATATTGGTTTATTAATGGAAGAATTTATATGTTGTGAACTTGCAGTAACTATGTTGATCACCATGTCAGTACTAGGGAGCAGATTACACTGCAAGATACCATGGAGGGTGTGGTTTATACTACTACTCAGTTTGGCTTGGATGGTCAGTACAACTTTTTGCTGCTTTCTATTTATCTTTATACTGATTTATTGATAGTGAATTTCAAGTATGCTATGGAGAGATCTGTGCTAAGTAATTTTAATGACAAACATATCTTGCAGAGCGCTTTGGTGACGGTGATGCTTCTCAAATTGGTTTAGACCTTGATGAGGTAGTTTGTCTTTTTATTTTCAATTTTCCACAGCATCCTATGCATGGAGCTGATGGATGAAATGTAATCTTTGTGGTGTTAAGGCTCCAAATACTGATTTGGGTAGTATGGTTTTGTTGACTGACTGGTTATAACTGCAAAGCATAGATGTTCAACACTGGTGGTAATATACTAAAGTAGTATATGCATTTGAAATTACAGGCTCGGTATGCTTGATATAAGTCTCATGCTTTTCATTTGCATCATTACATTTGTATATTAGCTCTGGGCATTTATCTTATCAAGAATAGGATTAAGAATGCTTTGCTGTTATCTACCAGTCTTTTTTATGAGTATAGGTACGAACCTTTGGTTGTTATTGGAGAACTGTTATGCTTAATTTGAGTTAACACATCTGTAAGCAAAGTATCTTGCTGTGTATTGCTTTGGAAAATAATTGACTTTAAATTTAATTGAATATGTATTAGGTTTTGTTAAATGACAAAGCTTCTACTTTGGAGCATGGTGATTTTGGGGCTAGTCTTCAAATGTCTCATCTAAATGATGAAAAGAAAGAGGAGGTAAGCAAAACTTACAATTAAAGACAGTGAAGCAAATAAGCATGGTTGACTTGATTTTTAATATTTGCATGTCTATCTTCCTTTGGCTGTTGTCCTTGTATATTTCATTATTCTCTCTTTTCTTGGTTGGAAAGTAGATGAAATGAAAGCATTTCTATTAATTATATCTTGTAGTTCTTCTTGTTTTAGTCAGTGAGCTGATTTGTTTGAACAGATTGATGATTTCCCCCCTGCTGCTGAAGTCAGTGAATATGCTCAAGGTCCATCTACCCCTGGACTTGAAGAGCCAAACTTATTTGGAGCTCAGATGGATCAGGGCAATAATGAAGCTGATTATCACAATTCAGCAGATTTAATATCAATGGAGGCCACACAAAATGAATCATCGGGTCACCAAAGGGAGAACAATGTAATTGATTGTTCCTTGCAAAGTAATGGGGATCATATTTCTTTAGATTTGCATCATGAAGATAATGGCTGCAATCTGGTTGAAATGGATATCAAAAGAGAGGAGCAGGAGCATTTAGCATGCCAGGTTGTGACGAAGCATCAAGAAAATTTGATACCTAGTGATCATTGCTTAACATCATTGCCCTTGGTGGACTCTTCCAATAAAGAGTATCCTACCACCCTTTTACCAGAATGTGAAGTTGGGATTATCAGTTCTTCTGATGTACCTGAGAAGGAGAACTTACAAAATGGAGTTTTGATGAACAATGATCCAGTTTCTGCTCCTTTGGACCAAACTATCACTGTTTCTGCTCCTTTGGACCAAATTGTCACTGTTTCTGGTCCTTTGGACCAAACTGTCACTGTTTCTGGTCCTATGGACCAACCTGTCATTGTTTCCACTCCTTTGGACCAACCTGTCATTGTTTCCACTCCTTTGGACCAAACTGTAATTGTTTTCACTCCTTTGATGAACAATAAAAATGTTGCTTCTCCTGGTTGTTCTCATGTTACTTCTGATCCAGAGGACCTCTCATGTAAACCATTGTCTAACATTGATGAATCTCGGGGGACTGGATCAGATGGCCATTTGGAGGATGGTAACACATTATCAAAGCTGGAAATTCCGAATGATGTTGAAATTTCTAAGAGTGAGGGGCAATCCTGTCCGTTAGATGATGCCCGAGTATCCAATGTTATTAATCCTCTAGGATCACCTGGGAGACCTGAAGTTGTTGATGTGGAAGCTCAAGCGTCTCAAGAACTGAAGGAAGCGGAGGTTTTAAATCATGTAACTCATGAAGCTGTGCAGCCCGCTGAATCAATTCTTCAGCCATGCTCCTCCCATCTGGGCCAGTCTTCTCTGTCATTTATAGAAGGTATTAATATAACAAATTCATCTCACTTGATTTATATTAATTTAATCAGGGTGTTAAATAGCTAGTGGTAGTGGAATGGTCCCTGGCTGCTATAGGGGCCACTCTAGCACCTGTTGCAGACGAAATCGCATCCATAATGGACAGAATGGAAGCACTACCTCTTGATTCCAAAAAAGCCCTCTGAACACTAACATGAGGTGTCTTTGATGGAGGCTATTTTAGGGATTTCAACTTCAAAAACAATATTTTGCTCTTAAAACCAATCAAAAAGCTTTCATTGCTGACTTTCTCTCTGAACCTCACTTTTATGTATTGATTTCTCGACCTTGTTTTTCTCTTGATCCGGCACTCTGATGACTACTTTTTCTTTGGCAACTGACTTTCTTGGCCTCTGTTTTCCCTGTATATTCATTTTTTTAGATTTTTGTGCCTCATTTTTTGTATTTTTATTATAATTATATGTATATATTAAAAATGTCAGAATAATGGCTATCCCACTATCTGATATAAAGCTATAGCATATTTGGTTTTGGCTGCCCTGCACTGCTATCCGGCATTTGAAACACCGAATTTAATTATTCATTTTCTCTTTGTTTACTCTTTTGTAACCGCTGAAGTGGAAAGGGTACATTACAAGGACTTCTGTTATCAGTGTTGTCAGGATCACAATAAAAGCGTGAATTCGCAGGATTTCATGATCTTGCTTCCTACTTTTGAGCTGGAGCATGAGTAAAATTGTGAAGTGGTGGGATTGGAGTAAGATCATAGTATGCAAAATCATGAAATCAGGCTTTTCTCTCTTATAATCTTATTTTTTGTGTTGGGTTGCACAACCTGTTTTGCCCAAACGTTTTTTTAACCCGTTTCAGTGCCCTAAATTGATACTTCTTGCTTCTCCATTTTCAGACCTAGACAAACATTGCCTGCATTCTGTATTTCTCCCACTTTGATTTTGTCTGTCTCTTGGCCTCTCTCCTCTGTCTCAACTGAACTTGACTCTGATGTGATTGTTCGCTGCTGTGCTTGTAGTGTGTTTGGTTTCTCTGCCTGCCTACAACCCAGTTTGCCCCAAATGTTTTTTTAACCCTTTTCAGTGCCCTATATTGACAGTTTCTGCTTCTCCCCCATTGTCAGACTTAGACAAACACTGCCTACATTCTCTATTTCTCCCTTTTTGATTCTCCGCTCTTGGCTGCTTTGCCTGTAGTGTGTTCAGTATCTCTCTGTCCCATTCTTAACCCTCCCTATCTGCTGTGATCATGACTGTGTGCTCTATTTTGCACTCTTGGTTGGTTTGAAACTTCTAATTTAAGTTTGATTTATGGCTGCCATTCAGGGTTTTTTACTATATTTTCTGTGTGTATATACATATGTATGCATGTAAAAATATATAATTTTACATTTTGGTAGGATCTTACTATCCTTGTTATGATTGTATATTATTATGTTTAAAGATGTTACAGACCACTCCCAATCTTACAGCTGGATCTCAACTTTGGCAACGTTGTCTGTTATTATAGTAATATTAGCATTTCTTTTCTATTAAATACACCAAGGAAGTGCAGGTTGAGAACACTGCCAAAGCTTTTTGGCATTTTTCCTATTATCAAATTGTTTGAACACGCATATCTTGTGAAGATCCGTTGGACAAACCAGAGTTCACGAAAAAACACTGAACATGTTATTCCAAAGTTGGTGGTGGGCAATGCTAAAGCACATGAGAACAAGATTCAGAACTCATTTTGATATTAACCATTATGTCACTCTGCTGTGTTGACTGTTACATGTTGACCTGTTTTCCATGTGTATTTTCTTTTTCTTTTGTGCATGGGTGGTTATTAAAATTATAGTAATACACTAATATTACCATTTTATTTTGTAATTTGAGTTGATTCTGTTTTGTTGTTAAGTTACTCCATTTAATTGTATAATAATGAATATTATAAAAAATCCATTATTTCATTTTATTGTAACCTGTTGCCTTTTCTCTTTACAGGTGAAAAATGTCATGTAGCTGATGCTTCAAATCCTGCTTTAAGTTACCAAGAGACTATAGAGCCATCTGTATCTAAAGCAACGCCTGATTTATGGAAAACAGATATGCAACTTGGGAGTCAGATATTTAGTGATAAAATAGAAAATATAAACAAATCTGCTGCTACTGACATGCCAGAGCCTGAAAAATTGCTCTCAGCTTACCAGCATGATGGTGGTGAAGCAAATGATTTGCTGATGGCATCTACTCCTTACTACCAGGGTGCAACTGAAGGCCATACAGGTGCTGCAGGAGTAAAATACATCTCCGGTAAAAAACGTAGCTTCACAGAAAGTACTCTTACAGTGCAGAGTATGGATTTGGTTGAATCTTACGGAGGAGCTCAATCCAAGAGAATTGCTGAGTCTGTTCCTGATGATGATGATCTATTGTCATCCATATTAGGTCAAACAGTTTACTTTTAATTCTTTTTGCTGTCTATTTATTTACAGTATGTATTTTCCTTGAGAATGAGATTGAGGAAAAAAATTGTTGTTGCTACAGTTGGTAGAAAATCTTCAGTTTTGAAAATGAAACCCAGTCCTGCAGCCCCTGAAATAGCATCAATGAAGCGTGCTCGTACTGCACCACGTACTAGTGCCTTAAAGAGGAAGGTGCATATGGATGATATGATGGTCTTGCATGGCGAGTATGTTTTTATAATGTTCCGCCATTCATTTGTACATACCTGTCCTCTCTGTTTTATATTGATTAGAATAGAGTGAAAAACATAATTTTCTACATTCATACTTTGAGTATATTTCAATTTGTTTTCATATTTATCTAGCCACTGTTGATTTTTTGCCTTATATAGCATACCACTCTTGTTTTGGTTACCAAGATACTAATGGTTTTTCTTTCCTTATTTCTTCTGAAGTACAATACGCCAACAGTTAACAAGTACTGAAGACATTCGTCGTATACGGAAAAAAGCTCCTTGTACTCATCATGAGATTTTAATGATTCAAAGACAATATTTGGAGGATGAAATTTTTCATGAATCAATATTTACAGGTATGCTTTTGCCTTTGTTTATGTTGTTCTCTTTTATGGTAGTTAAATTGGGATATAAATTATGTATTAGAAAATCTGTTCTCCGAATCATGAATTGAATCATATTGTAAATTGTATGATTCCTGATCAATAATAAAATATGAAACATAGCATATATTATTTTAATAAGATAATATTCTCTCTATATAAATTAGAATAGTTACAAATTGTTTTTTAATCATTAAAATATATTATCATATATTTTACAACAACTTAACTAGAAGTCTTTTAAAACAAAACTATTATTTATAGATTAATTTGTGAAGCCTTTATTTTAGAACGATGGCAATGAAACAATTAAGGATCTAATAGAATACATGCATTAAATAAATGAGCAACAAATGAAATAGTGTAATAATCAAATATGATAAGTTTAGAATGTTTCTTTAATTTCTTTTCATTTAACAAATTAAGCTTATATAACTTAATTTTTTTTCATTAGAATTGATGAAAAAATTTAAAAAATCATTTGAATCTTAGGATACAAAACCAATTAAGATACATCTTAAGATGCATATCAATACATAGCTAAACTGTATGCAATTGTGAATCATAAGATTCTGATAAACCTCTCTTGATTATTTGGTGCATTTGCTCAAAACCCCTCTCTTGCTCCCTTAAACAAGTTAAAATTGCTGAATTAGTCCCTCTCTTGCTCCCTTAAACAAGTTAAAATTGCTGAATTAGTGTGATTATGCTCATCATTAATAATTTTCATTTATTATGTTTTTACTATATTTTAGGGTTGGATATTAAGAAACATCAATTATGATATTTGACAAGTTAACCCTAATGTTTTGGGCTGACTGAAGTGGTCTATTATATGCTGTTTATGCTTCTATGGATGGTCATATCAGTTCCTTTTCAATTGTTGTCAATTGCTTTTAAAAACATTTTTATGAGAGCATGTGATCATCATTATTCCCATTAAGCCATTTTCATTTACTTAATTTCACATATAGTCTGGTAATTCTTTTATGAAATTGCTGTCTAACATTATATATTCAATTCTTTCATCTTCCAGATTTGTCTACTGATTTGACTATTCTGCGAAATGAGGCAATTGATCTGACCAGAATCAAGGTTTATGATTATGGTTTAGAAAGTTCTTGTGTAGAAAAAACAAATAATCAAGAGTCTTATTCTAGAACAAATACTGAAATTCATGGAGTGGAGGAAAATAATGAACCTCTGCCAGTACAACTCCAAGAAGATGCAGAAGTGCAACCAACAGAGATACCTGTTTTGTCTGATAGTCATAATGGAGTGGAGGCTATCAATGAACCTATGCCATCCCAATTCCAAGAAGATGCAAAAGTGCAACCTACTGAGATAGCTGTTTTGTATGAGAGGCATCAGTCTGAAGTTAACTTGGGATGTCATGATATTGATGCTCATGGGCGTGCAAATATTATTTCTCATGTGGAGGAACCTGACAGTTCTCAAAATGTTGAAATGACTAATGATGGAGGAAATCTTGTAGTCTCTGAAGTAGAGAATTGCTCTGTTGGCCCTGGGCATGAATCTTCATCCTTAACTGAAGTCTTTGAAAATGATTTTACCACATCACTGACTCTTGTGGATAAAACCAATGATCTTGTTGGTTCTATCCACACATTGAGCATCCCAGATAATGAGAATTTGAATACAATCCCTATTCTAGAGGATCAGTTTGTGAAGGATCAAAGTAACAGAAATGGAATAGGTGCCATTGAGCATAACATAGAAGCAGTTAGTTTGGAAGCCAAAGATTTATATGCATCCTTGGCTACTGACTCTAAAGAAATTGATGAATTTACTGATATTCAGGCTTCCTTTAATGGTGATGTACCATTAGAGGACAACGGAAACAACATGCTAGGGCAGTTAAATGAGGATCAAATTGTTGCTTCTGGCATGGAGTGCGATGACAAAGATGCAAGGTCAGATTGCATGTTTACTGAAAATGCTAAAGTAGATTGTTTACAATCTGAAGCATTTGGTTTAGATGAAAAAGAGCATTATTTAAAAGATGAAGAAAACCCAGTCTGTCAGGAGATTGAACTACAAAGTACAATGTGCCCTGAAATTGGGAGTCCTTTTTTGGATCAGAATTATGTAAGTTCTCTGGTTTGCCTTAAGTTAGATGGATCCTTTCATATATTTTATAAATGTCATATTCTTCTAATAGAGTCATTTTACATGTTGGGTATACCTGACAAAAATTTAAGCTTCGTTTGATAACATTGTACTATATGATTGAAACTTATTGGCAGAAATCTGTTTTTATTTCAAGATTCTGTTTTTTTTAATGACACTGTAATTTTGGACCTGGTTGAATACAATTAGGTGATTAAGTTTGGATTTTAAGCTGGAATAATTAGGTTTGGAAAGTGATGGTTTGCTTATATAATTTTTTTCTCATTCTCATTTCTGACAACAGTCAAAGCTAATTTGCTATGAGTAGTGTGTTGTGGTTATCAATCCTTTTTTCTTGCACTCTTTTGTTGTTTTGTATTGTGCTATATTTTTGGTGCCATTTCTTTAAGCTGTTAGTGCTTATCATATCATATTTTAATTGTTGTTTCCAAAAGCCGATTATGTTCAACACTCTAGCGAGACATATAGTATATTATTGAAGTATCTTTTACTATAAATGCAATCAGAAGCATCTATGAGTGTTTTAGTTAAATTAACTACCCAAGCCTAACATTCATAGTGGAAGTTAAACATTCAACTGTTTACAACAAATGGTATAGTAAGGTAAGCCAAAGTTCCTAAGGTTCAGGAAAATAACAATGTTAGACATAGCCTGTATTTTTTAACATTGCAACAATTCTACCCACCACCTTTTATTAGTAGTGGTGACTAGTGAGCACCTGACCTGACCTGAAAGGCACTTCATGTAACCAGTAAGTGACACTACCTTTTTCTGTCATTTTGCCAGTCATCATTAACATTAACTTAAACTGCACCTTCAACCACATTGCCCTTTGGAATGAGATCTTATCATGTTAGAATGAGTAATCCAGCTAATTTCATTATTCTTGATTAATGGATATAAGTTTTTTCTTGTTTTTTAAGTGTGCTTTTGCAGAAGTGGTTTAAATGTCTGTCATTATGGTTCTTGGCCATTGGCATGACTGTCTGATAAGTATTTTTGAAATTTCATTTTGAAGTAAAATGTGATGTGCTGTTCCCAGCCATTGGCAGGGTACTTTTAATTAAGATGCTGTTTATGTGATATTTCTTTACTTTTTCATTCATGCCTAATTAAGTTCAATTGCTTTGTGATGCAGGACAATGACATTATTGCCAATGACACAGGTTTGCTTCTAGATGCTCTTCACTGTCCATTTTATGAAAGTAGTTAATGCTTCAAAATATTTACAACTATATGGAATTGGTCTATAGGTAGTGTTCGGGTTTAATAATAATAAATCCCTTGTAGACTATAGTGATGCTTTTGCATGCCTGTTTTTGCTCTGTATTTATTCGTTTTCTGTGTACTCAGGGTTTTTGAATGTTGGTGATGATGAGATAATTGATGATGATGGTGATTTTCAACCATGTGCTGAAGGAACCAACCTTGAGAATAGTGGATGGTCTTCCAGGACCAGGTTTGTTTTTTCAAAATTTTAGTAACTAACCTTGGTCTGCATAGAAAGCACCTGCACTAGCCCCCCCCGCCCCCCGCCCCCCGCCCCCCTTATGTTGCTAATCATTATATGTATATATGTGAAACTTGAACCTAATATTGTACATTTTGTCATACCTGTGGCAGTGTACACGTGTTCTCTCACACTTAATAGTAGTACAGTTCAAATACTTTAATTTCTTTTAAAATCCCCCCCAGGTCCCAGCCATTGCCTTAGATAGGACAAATTCCCTTAGAAGATATGGACAGATCACTGCATCTGCAATTAAAAGCGGCCTTTCACTTTAAAGAATCCCAGAAAGTTGTGGGTGTGTGCAAATTCAGTTTTAAGCCATCTTGACCAAGTAAAAGTTAGGAAGCACGGACATGGCAGCGGAAGGCTGTGTCAGACTGTCTGACACACCCCTGACACTGACATGCAATGGAAATGTGGCGAACAGTGTTGGACATTTTTCTGCTGTGTCCAGTTTCTTTTTTTGTTAGTGTTGGACACACAGCGGACACATCTTGGACATACATCAGACACATTTTTTTTTCAAAAATTTTAAAGATAAAACTGTAAGATTTCCTTTTTACAATTTAACCTATATTAGTGAACTTCCCTCATATAAAACCTATATATATATATTTATTTATTTATTTCTGCCAGTGTCCATATCTGAGTTAGTGCTTCATGTGTTATCCAAGTACCGAAATATACTTTATCTGGATCTGGATTGTGTAGGATACTAGGATCATATAACTAAATTTTCTGAGAATTCATTTGAGTTTGATAAGATTTTTATGCAGTTATTTTCAGTTTTGTGCATGTTATATTTCAATAGCTAGCTAATGCATATATTTACAGGGCTGTTGCCAAGTATCTGCAGACTCTCTTTGATAAAGAAGATCTACATGGAAGGAAGGAGCTGCATCTTGCCGATTTATTAGTTGGTAAAACACGTAAGGAAGCATCACGGATGTTTTTTGAAACTCTGGTATGCTCTTGAGAATTATTTACTCACAATATCTATTGTCCAATGATCCTGTAGCATTAATTTAACATCCTCATGATTAGGATTATAGCTGTAATATTTCATTAGAGAAGAGAAAGACATTAACAATGAGCTGAAGACAAGGTGTCATCTAAAAGCTTAATAAAAGTGGGAAAAGTGAATGAAAAAGAAAGACTAGTAATACAGAAGTTAGACTATCTCTCTGCTAAAACACCCTTAAAATAGCTTAGCTGAATACTGAACGGGCTGGGAACAGTGTCTAAATCTTGGTCATAAAACATGTTCTGTTGATTTAGCTATAATGCTAGTTCTTAGTTTTGCATGCAGGGTCGGTGCTCACTTTGCTTCAAAGGGGCTTAGTCAGTGACTTTTGATTGATTCACATTTAATTTGAACCATGATTGCAGGTTCTCAAGACAAGGGATTATGTCCATGTAGAACAGACAAAACCCTTTGCCAATGTTAGCATAAAACCTCGAATGAAGCTTGTGAAGTCAGATTTCTGAAACCTCGTATAGGAGTGGCAGATATAGTTGTAAAGATCCCTTCTGTGGTAGTTTGGCTGGAATCTGCAGGGTTGGGATAATATTTTCAACATTTCTCCCCGATTTTAGCCATGTCTGTTCATTTATAATTTTTTGGAAATAGGATTTAGTTGTCCAGTTTTAGTTCTTCAACGGTTGGGGGGTTGAAGTGGCACTTGTTTGTATCATCCTATTGATTATTCAGGGCCTTATTGTACATATTTTTGTAAAATGTCACAATTTGTAACTCAGACGCTAATTTGTATGTCGTTTAAATGCATCCCTCCAAGTAAGAATTATATTCTTCTTTCTCTAGGCATCAAATTTATGTAACAGAAAGCGCCTTGTAATTTAACTGTCGCTGGACAAGGTACATTTCTGTACTTTTATTTGTATAGTATCTAACTGTATTTATCCTTTTTAAGATTATATAGTCCACTTCAACGTCTACTTGTAGAGCGTTGCGTTCAACAAATTTGTGTCTTGGCAAAAATTCTTTTATTTTTGTTTTTATTTCTACATCAAAATGTTTTTTCTTTTGCTTTAATCACTAGTTTTATTTAGTTTTAGTTTTTAAAATAAAATAATAGCATGGCTATAGTCCCAAATTTAGTTTTTAAAATAAAATAATAGCATGGCTATAGTCCCAAATTTAGTTTTACTCGTTAAAAATAAAATAAAAAATTATAAGGATTTAATAGAGTTATAATTTTTTCGGAAGTTAAATTATTTAAATATTTTTATTGGACATTGCCCTGTGCAGAAAAGGGTACAAAACATGCAAGGCATTGATCCTTATAAAAATTGACAATTTGACATGCCTCTGAAGGGGCTTAATAATTTCAATAATGCATACGTGACATTTTTTTTTGCGTTCCTAATTTACTATTTGTATCCCCAATTTTATAGAATTTCCAAACTATTCATCCCCATTTAATTTTATATTTTGGTTTTTATATCTCCTTCTCAACACCCCCAATTTTATATCTCTGTCTCTCAAGGTTTCTTAGTCTCTCATCTCTCTAGTAAGGTTCTTCACTATAACATTTTTGTGTTTCGGGTGAGTTGTGGATCTACTATTTATAATGTACAAGAATGTGTAGATCAAGAGAATTGCAATATGTTATTTCACATTGTGGATAAAGTAATCTATAATTAATATATATATATATATATATATATATATATATTTACACTTATTTTTAAATCACCTGATCTATTTTATGGATTAGGTGATTCATAATATATTTTGTTTTTGTTTTTAAAATTTTTAAAATAGTTATTTCATCCATTGCTTTTTAATTGTAGAATTTTGAAGGTGTTTACTGTTTCCATTTATGTTGTCTTGAATATAATTAAATTGCAAATATGGCTAGAAGCAAATGGTTTATAGGTGGACATAATCAAGCTTCATATAATGAAGCACAACTAAAACTTCCTTTTGCTAGTGTGGCACTTTCTGGTACACTTTAGGATACATCACTCTTAAGGTCATAAAATCACATCGCAAATGTCATTTGGTCTAGAGAGGTAGGTTAACATTCATACTAATTAAATTGACAACATTGATACATTTAAATTCTAAGTCAACTAAATCGTAATTTTATAGGATTACAACGTATTTAAATGTGCTTCACATGGTTGTAAAGTGAGACAATTTGTGAAAGCAATACTTCCATGAAGGATACAATTACGGATATGACTTGTATCTCTTGGTCAAAGATGTTGTGTATAACATAAGAGATTAATTTATACCTTGAAAAAGTGGCATTCAGAGATAAACACTTTCTACTTTCCTATCGGCGAAATAACTATTACACTAGTCGACATATCCTTATGCACCACATCCCAGTGATAGGTAGTTTTGCAATATTGAGGTGATTGAACAAACATGTTGTCATTCTAGTTTGATGGACTTCCTACATAACGTTCAAAGATGTGTAATACAAAACACATGACCTCTTTTATTTTTTATAATTTTTTTTTGTAAGCTACTCATTGTCAAATTGTGGACCATTTACAACAAATGTTTGAGTTATGTATGGAGATCGAAGGAACACATGCATAGAATGAAACCCATGTTGTTTTGTAGTTGGTCTTATTAGCGATTGAGCAACGAAATGTCTATATTCTCCCTAGAGTAGGTCATGGGAGAATGATTAAACATTTTTCTTTACTATTTTTTTTTTGTCATTTGCTATGAATTGACTATTACCTCTTATCATTATTAGTTTTTTTTTAAAAAAAATTAAATGCAAATTCAGTCTTAAAATATGAACTTTGTTGTTATTCTAGTGCCAACACTCATTGCTTTAACAACACATGAAAACATAATGCAACGGATAAGAGCAAATATAGTTGGACAAAGTGTATTTTAATCTTTGTCTAGATTTATATAATCATATATAAAGTAAATAATTGCATAAATTGTTGAATATAACTAACGTAAGGGATAAGTCAATTCCCAAACACAAGATAAAAGTGTATATTCTATAAAACATTTGTGTTTGATATTGGGCATCGCTCATGGACTTATAACATAACCAAACACAATAAAATTAAATGTTAAGATGAACACACAAAATCATTACATGGATAAAGAAATTTTTCAATACAAAATGTTTTCATTTACATGTCACAATCTTATTACACAATGTGACATCATGTCATTTGAGGGACTATTTCTTAATGGAAAAAAAGTTATGCATTATTTAAGAGATAAAAAGACTAATATTGTATTGTATCATGATGCAATTATGTAACCTATATCAGGTATTGTCATTCATTTATCCATGGATGCCTGTATTCAATTGCTTAAAAAAATGTTACCAACCCGTAAATATGTTACCATGGGCAGCCATAGACAAATAATGATTTCTTTAATTGGTTGAATCTATCATAAGTCATAGCCTATAAACATAGAAGCATGCTCATCATTTCATACACTCATCTTTTTATTTAATTGTCTATAGACAATAGATCACAATTCTTCACTCATTCCAAATTATGTCACCATAGTACAATATCCATAGTGACCATTAGCCTCCACATCAACAATCTCCTATATGAATGGATGCATTTGACAAGAAATTTGATCAAGAAAGTCATGGTGCTGCAAAAATTGAACTTTGACAATTCCTTCTATGACTTTTGTATGAATGAACAATCATTAATAGAAGGCAACATATTCACATGTTTAAAATACAATAGAACATACTCTCTGGATCTTTCAAACGTATGTGGATAACCTTTTGGTGACCCTTTTGTTTTAACTTTTTATATTCTGACCTATAAAAAAATTATATTTTGGATACATAATGTTGTATAACTTACCTTTAATGTTCCATTTTGATGCCAAATTCAAATCTTTGAAGCAAATCGCTATGTCATCTAACTCTTACTGCATAAATATCTTTTCATAACTTCCACAAAAACATAGCAAAACTAAGTTATATCCACCTAATGTATTAAGTTATGTCCACATATATTAACAAGACAACAAATACCATGTATTGTTCTCACTTTCCAACACATGTAGTGCTAATTTTATTTTCAATTTGTACAATTTTACTCCTTAGGGAATATAAATTATTTAAAATTAACAAATTGAAAATAAAATAAGTATTTTTACCTTTAGGGAGTAAAAGGTAAACTAACACATCTATAAAAAATAGTAAATGAGTCATTTTTTTCTTATTTATAATAGTCTATGGTGAACATGAACATAAAATTGTTTCGAGCTCAAAATTATTATTTTGATAGGATTTAAAAAAATTAATAACTCAAAAGCTCAAAATATTATACTTCATGTAGTTAAATTAAAAAATTAATAATAAATAATTCTATATTTAAAATATTTTTTCACAAAAAAAATTAAAATATTTCATACACATTTAGAAACAATATTTACGCGTATGCACGGATTACTACATTCTAGTTTCTTATAGACAAGTAAATCCTGATCTAGAGAAGCTCTACTGTTAAATTATTTTGAATTTCACAACAAAAAATAGTAATTTTTATTTTAGAGAAGATCTAGAGCTGTTTTAAAATTAGTAATTTCGCTTTAAAAATGACAGGAGGGATTTTTTTTTTTTTATTGATGAAATGTTTGGCATCACTTATTTTGTTTTCTGGTGACTAAAACCAAGAGAAAATAGAGCTAAATTCATAGAGACATAAAAAAAATCCTAAATAAAAAAGAGGAAACTTTGACATTAAAATAATAAAGAAAGGATAATGCCAACCCATATGACAGGAATTGAATGAATAAATTGGCGTTGGAAACTAACGTTAACATCAGAGCTGGCTCAGTCCACTTTCCCCCAACGGTCACATTCACCGACCCAAACAATTCATGAACAAAGATATGACCGTTATGAATAGGAACCCCCAAAACAGCTATAATAGCAAGCACCACTCTCTCCCCACACATCATCTCAGATTCTCAAACCCAAAGCACCATCGCCACAACCTCACTTCTTTGCTCCAAAGTTTTTAATCTTTTCCCTGAAAACCGAAATGGGCCTCTCCACGATCACATTGAACTCCAACAACTCCATCACTCCACGCCACTATAACACCCACAAAGTGTTCCTTTTTTGCAACTACATTCTTTTGGGTGCAGCCTCCAGCTGCATCTTCCTCACCCTCTCTCTGCGCCTCATTCCCTCTCTATGTGGCTTCTTCTTCATCCTTCTTCAAATCTTCACAATCGCCGGTGCTATTTCTGGTTGTGCTGCTGTGGGGACTAACCGTTGGTACTCTGCACACATGGTGGCCACGGTGTTAACGGCCATTTTTCAGGGTTCGGTTTCGGTGTTGGTGTTTACAAGGACTGGGGACTTTCTTGGGCAGTTGAAGTCCTATGTGAGGGAGGAGGATGGTGCTGTGATTCTCAAGTTGGCCGGTGGCCTCACCATTTTGATCTTTTGCTTGGAGTGGGTGGTTCTGACTCTGGCCTTTTTCTTGAAGTATTATGCTTGTGTTGAGGGTAACAGTGGGACTATTGTGCCTGTCAAGAGTGGGAAGGTGCAGCAGGATGAGGACTTGAAGGATTGGCCCTGGCCTTTCCAAGTTTGATTCTTGTGATGGGATAATAATGCCATGCCATGTTACTTTCAAGATGCAGTGCTTTTCTGCTCATCTCTTTCGTCATATTCGTTGATTCGTTGGAGAATTCGATGCTTTTTTCTCCTAACAGATATGTGTGTGTTTGTTTGCCTATGATGTAATTAATTGTGTGGTATTCTCTTCATTCATCTTTGTTGTTGTTGGGTTACTTTTATATAATTTCCTTGTAGTTAATCTGAATTTCAGTCGTTATAATATCAGAATATCAGTTTTGCCCATTTTATATGGCTTGAGATCTACTGTTCCTACGTCACATTTTTAATATACTAATTGGTATTGAGATCATCAAATAAAGCTTTTTCACTTTTTATAACTATGTACCAGAAACACTTCACAAAAAAATCATTTTACTTTCCACGTTTAGTAATGGGATTCTTTTGTACCCTGTTTCAATCATTTTACTTTGTATTGAGATCATCAACTTTAAAGCTTTTTTACTTTTTATAATTATGTAACAGAAACACTTCACAAAAAAATCATTTTACGTTTAGTAATTGGATTCTTTTGTACCCTGTTTCAATTTAGTGAGTGCTGCCACACACAATCAGGGGGTCAGTGAGTGCTTAATAATGCTCCTCAATTTAACATTAATTCCATCATTATTTAATTTTTACACCTCAAAAACTGCTGAATTATCTGCCATAGAAAATGACTTTAGGTGCTTACAGAGTCATGTCTTCTTATTACCGTGTTTCAAGACCAAGATGATGTTTGAGCTGCTGAAATTTGAAACCTATATGCAACACTATTCTCGGTAAAATTAAATTTTTCAATACTTACTACTACTATTACTGCATTTGATTTTCATGCAATTATTACATCAAACTTATCTCACTTGATTACTCTATAATTAATTGTCAGTAATTATTCCGTGCTCCAAAAAAATAAAATAAAAGTATAATCCGATCCTAAAACTAGTTCCTATTCATTCAGGACTTGAAAACTTATCTCACTCTCGAAATTGACCAACATTATCTTTAAACATGAGAGATATTACATAATTATCTGTTTAACCAAGTTGCCAAGTTTTATATTCATAGATGACCATGACCAGAATTAAATTCATAATCTTTAAACATGAGAGATATTGACATATTTATCAGTTTAACCAAGTTGCCAAGTTTTATATTGATAGATGACCAGAATTAAATTCATAATCTTTTTTTGTCTATACAGGAATGAAAAGACAGTCAGAGAAATCACAATAAGTCATGCCCATGTTCAACCCGTTGAACCAAACTCCCTTCCCGATTTAATTCATAGTCTGGTAACACAAGTAATATTGTGATAGTCAACCAAAAGTAAATTCATAATCTTATAGCACAAAAGTAATATTTCCTCTTTATTTGAAAATAAAAAATAAAGGAACTTTTTCTATTTTCATTTTACTTCTTAAAAGTACATGCCTTTTCCCCGCCTTCATTTGGGGATAATTATAAATATAAACTGTATGGGTCATACAGCTGCAGCCTTCAGACAAAGAAAATCTGAAATTTTGTTGGTATAGAAGTCTGGTTGTATGGTGTTGCTAGGACTCTGAAGCATGGTCAGTGTGGTGACCCCAGAGAGCACAAGAAGAGTTTTGCAACCACCATTTTGTCCAAATAAGATATCAGTGTCTAATCTGTCCCCAACCATACATATTTGTGACTTCGCAATGCCAAATCTGTTCAATGAAATTACAACAGAATTAAGGGAAACTCTAAAGCAAATTATTTTTTGTAAATTTTATTTCAAGTTCCGGTGCCCTAGATTATTTATTAAAAATTGTGATGAAATAACCTTTTTATTTATACTGTAAAAATGTGAAATAACGGATTATATATTTATTTCTGATTTGACGGGTATGCAACTGTGCATTATAATGTTTATATGCCAAACTAAATTGAAAATATATGCAAATGTGCTCTACCCATGGGGTTTCTGTGGACTTCTACCAGTGCCCACCTCAACGGTGGGTCTTCCCACATTGAAAAATATGAACACATTCTGTTTGGACTTAAAAATATGTAATGAACAAATAGGACAGTTTAATGGAAGCAGGAAAAGATCATATAATAATCTGTGGTGGAAACTTGCCCAATAGAAATCTCCACTCCAACCCCAGGCATGAACATTTCTTCCTTTACCGTTTTACTTTAACATGTTGTCTAGGAAGACAATACATAAACATTGTGCAACACAATGTGATTCACTTACGTCAGGTTATTTAGGCCACAGATAATTTATCTATCATACGCTAAGAAAAAGGAACAAGGCAATAGAAAGCTTTACTTGTTTGCTAAGTAATCCATCATAAATGTTGAGGGTTTTCCAACAACTAGTGGCTCACGTTGAGTAGATCCAATTAGAGCGCCAACCATTGAACCCCCACCTGAAATTCAAATAAAAATTATTTTATACAATTTTAAGAATGATTAACTATTTTTGTGATTGATGTTTTGAACTGTTTTTAATACTTTGAACTGCTTATTTTGCCATTTTCTTACTGCAATCAATTTTTTTTATCAGTTAATGCAATCTACTTTAGTTTTCTGATTGTAGCATGATAAATAAAATTTGAACAAGACTCCCTAGATTATTATGTAGAAAGTAGTAAATAATATCAATAGAGAGCGGAAAGAAGGACAAACCTGCCCATTCTTGAGCATCTGTTAGATGAGTAACAGCATCTCTATTTGTAGCAATGAAAAGACATCCAGGGTTTTCACGTATACAGAGTGTTCCATACCTTCCATCACGAAAGAAAAAGTAATATTTAATAACACATGCGGAGTTTCTATCCACCTTAGCATAACTTTGAAGTAGAATTGCAATATTCATCACACTAAAGCTAACGGGAATGGCTTTTCTCACACCCCTTTCTGTTATATTCCTTTTATATCCCCTCTTCATTTCTACCTCTCATTTCCTTTTCCATCACATAATCTATCACATTTTTCACTTCCTCTTTCTTCCTTCTTCCACTCTGTTCTATCTCTCTCTTCCTTCTACCCCAATCTTACTCCCTGTTAAATACCCATTGCATCAGGTGATTTAGTAAAATATTTCAGGTTCATAAAACCCAGATTTTGCTAACCGAAGGAAAAAAATATATTTCTGTATAAGTACAAATTTGAAAGAATAAAACCTTTTGCTTGGAATTTGAACCGCAACAACATTTTATAAAGAAAACAGGAAAAAAAAAATCATTCTCTCTAACTTAAGCGCATACACATGTTCATATAGTGTTTCAGTGACTGTTTGGAAGCTTACTGGATTTTATAGTAGTTGAAGTAGCGATCAAACCCAACAACAACTGCTCCAACCTAATAAATATACACATGTTTTTACAGGAACTAGGAAACATATTAAATAAAAAACTGCCACATCTCAAGAACAGCACGAAGTACGTACATCCTCATCATGCTCCATAAAAAACCCTGGCTTCAGTTCGATCTTTTTCCCACCATCTTCCTAAACAAAGAACATGCATAAACAGAGGGATAGAGAATCATACATAAGGATAATTCCATTACACATGGAAAAGGTTCAAATCACAAATCAATGCATCAAAAGTCAAAACCTCTACGCAATTAGATCACCCTAGTTTGTTAGAATAAGAAATGTTTGAGCTGCAAATTTATGTACCTAAGCCATGACACAAGCAATCTGTACTAAATTTAGCTTTCAAGTACTATCATTCTTACGAACTGTCCTCTCAGGCAACTGAGGCAAGCAAGGATAAAATGTCCTTCGGCTCCTATGACACTTACATGACCAACTCCCTTAATGTCTTCTAAAGAACAGTTTTATATCTGACAGTTATTGTTGCATATTATAATATGAAACAAAGTTAATATGTTAGGATAACTTTTTTCTATGTTTAACTATTATTTATATTTCTTATTAGCTTCTCCTATTCCCATGGAAGCACATAAAGTACTATGTACATCATCTATTAATTTTGTTTGACATACAATGCCCGGCCCTGCCTCTTACTCCGAAACTCATTCACTCGAGCATCAGATGGTGAGACTATTATATGCCCCGCATTATCATTTAAATCTTATGTATGTGTTATCAATCAAACTGATTTAAAAAAAAAAAGAAAGAAAGAATCAAATGATATTACACAGTGACTGTGTCAAGTGATCAGATTTATAAGTATATAAAAGAGAAAAAAGTAAAAATTTGCCTATGGAACTCAATAAGACATACAGGCCCACCAAGGTACTGATATCCAGCAAGCTCAAGCTCCTTCAAGATGCCATCTTCTCCAATGACATAAACCTAAATCAGGCTCATCTATTAGTCCTTTACTTTTAACTTTAGACACTAGTATGAGAAATAGTTAAGATTGTGAAAGATATAGCATTCAAGTGCAACATAATTCAAATGTAATGTCCTAAAGTATAGATCAAGAAATATACTTCACAAACATAAATCATGCAGCAAATAAGCTCAGCGTTGCAATTACTGTAAGAGTTTATAAACAATTATGGTTAACAATTTAACATCACTTATCATTATTTGGCCTCAAAATCAATCTCTTGTGTTCAAAATGCGTCATATAATATGTAATGTCATAGGGTCATATAATAGTAGCAAGGACCTCCCTGTTAATACAACAACAATCAAGCCTCGTCCCCCTCCTGGATCAATCGAAGCCACTGCCAGTAGGATAGCCATTTTGAGAAAGGTCTTTTTAATCATTTCTTGTACAGTTTTCTTAGGTTCTCCTATACCCTTTTAAAAGAAAATCATTTGAACCTAACCAAACAAAATGCAGGTGCCGGGTTCAGCTTTATGAAAGACATGAGGGTAAAAGGCACACTTTCCATTTCAGGAATTAAGTGATTTCAAGTTAATGTATTTCGATTTTATATCAATAGAAGTAACAGACAGGAAACATTATGCCAGCAGAAAATACCAGAGATGAAATTACACATTTTAAGAGTATAGCTTAAATATTCTTGGCTTAATTATAAGGGTAGACTGGTAGAGTAATTATATTTAATGCCAAACGAAATTACAGAGAAAAATTTAAAGGGAAGAAAGGTTGAATGCAGAAACAAAGATCACACTTTACTAGTCAACTATATGATCTATATCAATGTAAGCTAATTTGTATATCATCTTATACTTTTATATAAATATATAGCTGTAATGATATCATGCTAACCTTGACAAATTAAGGCAGTAAATATTAAACAAATCAAAACTTGAATGTAAGATTTATTGACTTCTAAATTTAACTGCAGATCACTGTAATTTACTACTAATTTTAACAGGGACTGGGTGCCATTTGAGGTTAGAAGAGCTCCTACATTCAATATTAATATTATTTGGATCATATTGTAAAGCAAAAGATGATATACGATACCTTTTTATCTTTTGGGAAATCAATAGACTTTAAATATGCAGCAGCCGCAAAGGATGACGCAAAAATCTCCTCCTGAAATAGCACAGTAGTTAATGATTGTAAATTCATTATTATTCACTAAACAAATTCAATGCAAACAAAGTGAGGAAAAACAAATGTGGACTAACCTCGCTGACATTTAAGCCAAGTGTTTCAAATTTCTTTCCATATTGCTTCCTAGACTTTGTTGAGTTGTTAGTGACAAAAACTAATCTTTTTCCCTAATAAATTTATCAAGAGATCCAAATCTCAGACTTTCTGCGCTTAAAAAGAGTGAAAATAAACTGAAGAATTGTTAACATGGACACTTGCAGGTAAAGTCCTAGTGCCCGCATTAGTACTTACCTTGGACCGAAGCATGTCAAGCGTTTCAGGCACTCCTTCAATTAATTTGTCACCTTTCCATATAACTCCTGCAAATTAAGTTATACGAAAAAGGAAACTCTGGTAAGAAGGTAGCATCATATCAATAAACTCGTCCTAAAATCACTGGAAACGTTTCAGTTCGGAAATTTATGGAAGCAATCGGTAACATACCGTCACAGTCGAAGATAAAAGTTTCGACAGAGTCAATGAGTTGATCGGCATTCTGAAGCGGCTGAGCCGACGCGCGCGGGGCGAAGGTTCCCATTCCACGTTTATAATTCGCCTTTCTTTTCAACTTGAAGATTGCAGCGGAGTTACGAGTAGGGTCACATAATCTATAATTCGCGTGAAATGATTGCAACCATTGTTTGTGACTGTGACGAACACAGGTGACTGAAACACTCTGTGCTATAGCGCTGCTCCTAAGCATCTCCTTTTTTTTCTTTTTGTTTTTTGGTTTATTATTTTTGTGGTGCGTGCATGGCTGCACCAACTACTGCCAAAGTGAAGCGGTTAATACATTGAATAGAAGCCATAGGTTTGAGTGGACCGAGTAGGTTCAGTTTTGGATCATAATCTCATGCCCAACCTCTGTGGATGCTATTAAAAGATAAATGTTATAATGTGAAGACTTTAATTTTAACTAGTGCTCTCCTACGATACACTTTATCAAAATTGTTTAAATTAAATATATATAATAATTGTAAGTTATAAATCATGTATTTACTAATAAAATAATATTTTAACATTATAGAATAGGATAATACGTTTTTCAAATTCAAAGACATGATATTTTTTATATTCCTATACCTTCGCTAACAGAATCTTATATATAAAAGGGTTAAATGTCATTTTGATATAAATAGTTTTTCAAATTTTTGTTTTTAGTACAAAAGTAAATTTTTTACCTTTTTTTTGTCAATGGTCTTACCCAAATCTGTTATGTTGATTGTTAAGTAAGTGGAATGGCTAAACATTCATTACCACGCGCGTAAATATCTTTAAGCGTTGATTCAACATGTTTGTGTAACGCGACTAATATTTAATTAGGAATTTCATTATTTGATAGAGGAGAAGTAGCAGTTTGAACGAGAAGGAGGATTTTTGTTAGCTAAGTCTCACAGGTTTTTGTTAGCAGAGAGAGGATTTTCATATGTAAACTCATCACCGTCGACAGTGGTTGGATGAAGATCATGTTATTGTGGAAAGAAATGTGTTAATGAATTCGCACAATGCTCAGAACCTAATGAGGTTTTTTTAAGGATGTTCCAATTGAAGGGTAAAGGTTACGATTTTGTTTGGAATTTTTCATATTTTTTCTATTTTGTTCTTCATTGTTTGATCCTTGGCTGATGTTTTTTTTTTTTTTCTCTTTTTGAAAAAACTGTATATTCCATCAAAGAAACAACAGGTTCCACAATCTATACAAAAAAACAAAGTGAAACTCAACACCATAGTTTCACCACAAACTCCGACATATACTCATAATATTCTCAGCCCAAAGTTAGCCTACACAATCCAAAATAAATAAAAAGCAGAAACCACCACTCAATCCTATACTTTAAATCAACATTAGACATTGTAAGGGGTCAGAACACCAATCTTAAAACATTCATCCCAATTAACTCCAAAATGATAAAACAAAATCATTTGCAAGAGGTAATCAAAACAAAAATTAGAATATAAAGAAACTTCAAAGTTTTAGTGTTGAAAATTATGCAGTTTCTTGATATCCACAACCCTAATAAACAACATGTCAAAACAAAAATATAATTTTATTCCTGAGTCTACCTATAGTCTGGGAACTAACAATGTTAAATGGTTGAAATAAATCATTCGAAAATGGTAAAACCACCTCAATCTAGTGCGTCACAAAATACCATAAGGATTGAGAAACCTTACATGATAAAAACAAGTGTTTGTAGTCCTTAGGATGATCTTTGCACAAGCAACACATAATTTGGTTGACAAGAATTTCATGCCTCTTCTTACTAGATTGTCCAATGTAGGCAGCCTATTAAGCAATAATCTTCAGGAGAATGCAAACACCTTTGAAGGAAACTCATTCCTTCACAACCACCTAAAAAATTGAATGTCCTAATTAGGTATGCTATGTCCAGCAGGCCCAACCCTCAATGTAGAATAAGTTGCTGACATAGAACAGAGAGTTTGAATTTAAAGCCACCCATTCTCACTGATCCAGTAATTGTTGATCCAAATGAACATTTTGCAGAAGTAGAACAAGTTCCTGTAGAAGTTCTTCCTCCCAGACAAAAAGTACCCTCTTCTATTCCCAATTTCAGCGATTCGAATCTTGCATTGTGCCCTTGATGTTGTCTACTAAAACATTTTTATCAACAGTTAGTGAAAACAACCTAGGATACAGATCTCCCAAAGTCTCACCCCCTACCTAATTATGCTTCCAAAAAAAGGTATTTTTCCCATCACCTATCTTCCGTATAAGATTATTAGAGAACCACCCCAACCAAGTGGGACTATTGTTATTTATTGACCAAACATCCTTCCACCACATAGACCATTTCGCCGACAAAGAGTTAAGTATGGGTTGTCTTTGAAGCACATATATCTACTATTTAGTAAAGCGGACCACATGGCCTCATCCTCATTAAGAATTTCCATCTTCATTTAGCTAGCAAGCTCAGGTTGAAATCCTTTTAAGCACTTCACCCCCAACCCCCCTCCTTTTTTGGCAGGCACACTCTCTCCCAACTTACCTAGACAATTTTATTAACTTTATCCTCTCCACCCACAAAAATCTCCTCTGAATCATCGTTAAACAATCAATGACGTTCTTGAGAGCTTTATAAAGGAGAAGAAGTACAAAAGCAAACTAGTATGAACCGCATTAAATAATATTAAATGCTTCCCAAAGGATATGTTTTTAGCCTTCCAGACTGCCAACCTATTTTTGAAATTATCCACCATTGGTTTCCAAGAAGAAGCACGCTTTGGATTTACCCAACTGGAATGCCCAAAAATGTAAAAGGTGGTGAACTCACTACACAGTTTAACAAACACTCCTACAACATGTGCAAAATTTTGATCAATATTCAATTCGTAAAAATGAATTTTCTAGAAATTAACTTTAAAATTTCCTTCACCCACCACATTGTCTGAAAATCAGTGTCCCTAGTGATGATAGCATCATCTGCATATTGCAATAATGAAAACTTGGTCTCTACTTCCACGTTGATTTGCTTGTACCCTCCATTTTGGATGACCCTCCTAAACAAATCGGATAAACTTTTTGCCACTATTAGAAATAGAAAATGAGATAGTAGGTCTCCTTGTTTAATTGCCTTGATTACTGAAACTCTTCAGAAGGACTGCCATTAACCAAAACCTATATTTGGGTATTTGTGATCAGAGTTGAGATCCACTTCCTCCATCTCTAGCCAAAACCCAACATGTAACACATATAATCCAAAAAATACTAATTGATTGAGTCACAGACTTTCTCAAAATCTACTTTAAATAAGAAGCATAATTTTTTAAACCTATGAGCTTAATCAATGACCTTGTTAGTGATCAATACCCCATCCAGAATAGACTTTCCCTAAAAGCTTTTGAAACCCTAATATTAGCCCCTTAAGAACTCTTTTTATCCCCACCATTAACATTTTTAAATAATCTTATGCACACTCAAAATAAGAGATATAGGCCTATATTGAGAAAGACTATAAAGGTTGACCACCTTTGAAATCAAAGCTAAAAAGGAGGATGTAACAGCTTTGGGGAGTGCCCCTTGTTCATGAAATTCCTAAATTGCCTTGACCAACTCATATCTAATAATCTCCAAATGATTTGTAAAAGTTCATTCCAAAACCATTAGGACCTAGGTTTTTCCCTCATTCACTGGACCATATTGTCTCCTTGATTTTCTCTTTGGTGAATGGATCTTCCAGCATAATTTGCTCTTACACAAATGTTTGACTGAAATCTACTTCGTCAAGGTTCAGCCAAATAAACTCTTTCTCTAAAAACAACTGTTTATACCTTGTCAAAAGATTCTTCATCATTCTTATTTTTGTTTAGCTGACATCAACAATCACGACATTAAGGATATGGACCAACAGGTTGCTCAAATTGTTGAAGAGAAAAAAAATACCAAAACTATCAAAGAAGATTGAGGCTGAGAAAAGAAAAATTTATAGTTTTGTTGATGTGTGTTTTTATATTGGCCTTTGTTGTAGTTTTGGTCTCTGTGGGTAAATGTAGTTATGGTTTATGACCATTTAAGTAGTGTAGCAAGTTAAAGAAAAAAAGTAAATCAACTTTTATCAATGTGTTTTAGGATATTTTGTTTGCAAGTATAGGTTTGTTGTTATAGCTGTTAGTTTGTTATTATTTTGTAATGGGTTCATGTAATAATTTACAACAACTGAATGAAATTGAAAGATTTGTTGTACAATTTTGGTTCTATTACATGAATATTTTATTTATTTATCACTGTATTTTAAGGTATTCTAAATTTGGATTTGTAATGAAATTTTTGTGGTCATTTTATGTGTTCCAAATTATGAACACAAATTGGCTAATAAGTGAAAACAAAATGACATAATTTATAACCAAGTTGGTTAGATTATATTCATTCATAGACCAGAAGTGTTGATGTTGTCACAAGCATAACTTTACATATTAACAAAACAAACAAACTATAGTTAAATTGGTTTCAACATAACCAATAATTTCATTCCAATCTAACATTTGTCTAAACACAAGACATTTCAAAATAAAAGACAACTCATTTACATCACTACTCATTCCAAAAAAGTAATTTCCTATAACCTACTTATTCATTATCTTCAAATCTGAAACAACCTTGAAAGTTTCCTCCAAAGCCTCCACTACCTTTCCAATATTGATGTTCTTCTTGCCTTTTGAATTGTCATCCTACAATACAATGTTGAATATTAATCTTGATCCACTCCATGGTTTTCGGTGTTCTGATGTAATTTAAAAGAACTCTAATACACAACCAGATTTTTAGCTTGTTTTATTCCATCTGAGACCATCTTTGCAACTTCAACTTTTGCAACGACTTTTGAGATTTTCGCCTATAATAGCAAACAATATTTAAAACTCACCAGACAACATATTTTTCCCTAAATTTTTTCAATTTTTTTAACATAAACAAAATACATTTTTCCTAAACCTTATAATTTTGTTCACATTCTTTGCATGTGTTTTTGCTAACCTTTTATTAACAACAATTGTTTCCTTAGGTCTAGGTGATATTGTTTCCCTTGTTTTAGATAAATTAACAATATTTATATGATTTTCCATGCTTTCACTTTAATCACAGCAAGTATAGGGATTATTGTGTCTTGGGTTAATTTCATACCAAGTGCAGGGGTCCCATTGTTGCATTTAGATTGATAATAAGTGCAAATGTAGTTGGTGATGATTATTGAACATTCAGATAAAAAATTGAAAATAATGGTTTCAAACTAAATTGTCAAAATCTCAAATTTTACAAAAGAAAGTTACAAAATAGAACCCTGAACATTAGCAGTATGGGTTGTTTAAGTGAGTAGTGGTTTTGAACCATCCAATTTAGTGTGGCCAGTCTCACTATATTTTCCACACGTATTTGTAATACCAATTCTCAACACTCAATCCCTATTATTCTTATATGTTAATATTTCATCTAGATCCCACTTTTTTTAGTTTCTTGCTTATGATATAGACTTGTCGATGTCAATATCAAACAAATTAGATTTTCCAATTTTGCAATACAGGACACAACATAGGTCGTCTCTTAAAGATACAAGACATACATGTTTTAAATTCTATTAAGAACATTAGAAAATATGGAGGACGATTTAATAGAGAATTGTAAAGAAACGTGCAGAACAAGAAACTAATTCGAAAAAAAAAACAAAGAAGCAAAACACTGATTTGAGATTCCTAGTGATACACTTGAGTATTCACAATTCTAAGATTCATGCGAAATTGCATCAATACTCACAGCTAATTCAATTGAACTAGATCACAGTCGCAATCTCAAGATTCTCGTGAATTTTCAAAAATCTAATCGGTTGAAACAGGTTCTCAGTTGATCACTTGGCCTTTTGAAATTCAACTTTATTGATCTGAATCAATCCATAACCAATTCATATCAAAACTCAATCGAAATTCTACATGAATTGGAAAGGAGAATATAGAAATAAAATGCAAAATTCGTGAAAAAGAGAACGCATAAGAGATTGGAATTTATACTCTTACCTCATGATCACTTCAGAGACCTTAGATCGAGTTCAGAAATTGATCTTCTGTGAAGATCTCCATGGAAGCTTGTGTGAGAAGGAAGAAGACGGAGGAGAGAGAACTTGTGGAGAAAGCTAAAACAACAGATCTAAAAACTAAAATTAAAATGATTCAAAATTGTTACAAGTGGTTATGAGAGGCTATTTATATTCCTTCACTAATGGGTCTCTAAAAATGCCTAAAATGAAATTGGGTTTTGGCCCAAACGAAATTATTTAAAAAAAAAACAACAAAGGCTAATAGAAAATAAAATTGAAAATTACAATTAAAAAAATTACAAAAATATAAAATACAGAAAAAATATGAAAATACAAACAATTAGCCCAACGTAAAGTTCAATCTAAGAAAGTTTACTAAATTACAAAACAAGGAGAAAAATATGAAAAAAGCCAAAACACGACCCAAATATAAAAATGAACTAAAATAGAAAATTAAGAAACAATTACATAGTTATAAGAATTATAAATGATATAAAATGTGTATATTAAAATGGTCCACCAGTCTACTTGCACCCCTTTCGTACCTCAGTGGCAACACTTATGGATCATCACTCTTAGGCCATAGTTTTGGCCCATTGATAGGAGTAATACATTGCTCATAACACAAGTCATATAATCCTTTAGTGTAGAATATGTGCACAAAATTCTTAGACATTCTCTTCGCATAGTTAGGGGTGGGTATACAAATTAGTCTGACCCGTTTAAACCCAGTATGTGAAACTCGCATTTTAAACAAGTTGAATAAATCTGATATGCTTAAATAAATGGACTTTTTTTAGAGTCTATATTTGGTTTGGGGGCTTAGTAGACTGGTCTAGGGCCTGCACATACACCTTTTTTTAAATAACTAAAAAAATATCTAATATAAATTTTTTTACAATAATATAAAATATTAAAAATTTTCAATATTAAAAGTGTAAAAATATCATAGTTTACAACAAAAAAACCATAACATTAACACAAACTAATAGTCTAAATAACAAAAATTTCCCTTTAAACAGGCTACTGGCCAAGCCTGTGAGGCCACAAAGTCCTTGGGTTTCACTTATCGAGCTCAAATTTCTCCAATAGTTATAATTATTTAAAAAAAAGTTCAAAACTCGCACAGGCTTAGAGATTCGCGTTCTTGGGTTCCTATACCCATCCTTACACATATTAAATTGCATATATAACATTTCTACACAAAACTCCATAGATATCTTATGCATAACATGTGCAGATATGGACTACAATATTAACTACGAATTTATCAGTGAATAAATTGTTAATAACTTCAAACATTGGTGCAACTGACCAATTTGTTAATCAGATAACATTTTTCACCATCTTTTTAGTTTATCTCTTCATTGGATTCAACCCCACAAGTTCAACATCAAGTAAGTTCTCATTCACTCCGCCATGGTTATAATAGGCTAGTCCCTTATTGCAAGCAAAATGTTGTTAAATGACTTAGTTAAATTGTTTATTAAAACATCACATTTGGGGTTAGGATTGAACACATATTTTCACCATGTTTCCTTTGCAAGGTCATATTTTAACCAATTATAAGCATCCGCATTAAGTTTTTTATCTTATTCATTTTATCCTCCCATGAAGATTCATGTTGACTTAGTTGTTGCCATCATAAGGTCTCTAATTTGGGTACCACCTCCAAACCGCCTTTTCAAGTTATGATATAAATGACGAAGGCAAAAACGATGTTTGTTAGAGAGATATTATTGGCATAACAAATTATGTGAATTTGCCATGCGTATAGTATGACCATTGCAAGTTTTCACAATATGACCATAACATTGAGTATTGTTTATGATAATCACCTTCAATCATCTCTTAGGTCAATTGTTTTCCCATGTGTGTAATACATTAGGTTACTTCACATCTAGAACTCTCCATTATGCCATTAACAACTTATTTCATAATTATTTTTCTGTGAGACTATAGCATATCCAAAACTTCTTGTGCCACCCATTTAGACTTGAAATTTTGGTTAGAAAATATCGTTGTACATGTATACTGACCATGCAACTAGAAAAAATTGAAACATGTGGGTCTTACCAAATTTATTGCACTTGACCCTAAAATCACAACCTTGAGAACAAACAAAATTAGCTTTATCTTAATAAATGTAAAATATTTTTTAATTCTTATTAGTATCTATCACTTGTTAATAGCTTGTGTATTTAACAAAAAATAAAGTCACCATCTTAAGGGGTGATGACCTAAATGGGTATATTTTTAAAAATATTTATCTGCATGAATATTTTTTGAAATGTGAGTTTGTTTTACATGTGACTAGGTCAAATTGTAGCTTTGAATTATAGTTTGACTACTGCGCAGGATTTTGACCATTGTGGATGACATGTAACAGTTAGCAAGGCAACCAACCAACCACCTAAAACTACAATCACCACTTGCAGTTTAAAGGTATTTTTTCCCCCTTTAACCAGACCTATTGATTGCATTTTTTTGGGGGGGGGAGGGGTTTCCGTTTTTCTAAACAACATCAATAAAGTTGTTAAAATATTTAAATATTAAAAAATTAAAATTTAATTTTTAAAAATATACTATATGAATTAACAATTAAATACCTCAAAAGTTGAAAACTCTTTAAGGTAGAAACAAAAGTTGTAAACTTTCCACTCATAAGCCTTTTTTTTTAAGCCTAAACGCGTAAAAAACTAATCTTAGGGATGAAAAATACATACCTGTGGGCATCATCCCAATTTTGACGGTATTATCTACTTTTATTGAGTATGGGTACAGGTACGACTCTTACCCACCCCGTACCCGCACTCGTATCTTCCCCATTATAATTTTAATAATTATATAATAAATTTAAAGTTATATATTTAATTAAAAATTTTAATTATTAAACTTTAATTTATAATTTATTGTTATTGATTATTCTTTGTATGCTTTTTAAATTAAAATATAATTAATAACTTGATATATATAATTTATTTTAATAACAAATAAGTAAATCTAAATTGTAAAAATAATATAATGGGTACCCGCTATATACTCAAACATGAAAATACTCGACAGGGGTGAGGATGAGAATTAAAATTTCATACTCACTTTTTTATACTTGAACTTGTCTCGCCCTTTCTAGGGATAGGAACGAGGAGGTCAAACTTGCACCCACCCTGTTGTCACCCCTATCTAAACTTATAAACTTTGCATGGGATGTTACCAGCAAGGGTGAAGTGTGTATTTGTAAGAAAGGATTAGTAACCTCTATTAAATCGCAAATGAGAACAGTGTGTTTGGGGAAGCATAAATCGCAATTCCGAATTGCGATTTATGCTTGTTATGCCTCATAAATGACAGTGATTGGACGACTCATTGACACGCTGAAATTGCATATTTCCAACTATGATTTTATTTGCCTAGAACTTAGTAACACTGCAAAAATTGGTGTTGAAGGAGACAACACCCTTAGGGTCGATTTTAAGGGTTATACACTACTTTTCCATGTGCACGCTAGGTACCAAGATAATCTTGTCTCCTAACATAAATTACAGGTAGTGATTGCAATTTTAGATAGTTTATTGACTGTCTCTTTGCTACTACATGTCATTACCAATGGCCAAAGTGCTACGTGATATTCAAAACACAATTCAAAGTTACAGTTTGACTCAGTCAAACTTAAAAACACATCCATCTTAGTAAATATTTTCAAAAGAGACCATATAAATATTTTAAAAAATGGATTCACTTAGGTCAGTTACCCTATATTAAGTGAAACTTTACGATGTTTATGATACCATCTCAAACAATTATTTCTTAGATACTAAAAGTAAATAGTTATTTATTGAAAATCATGTTAAAAGCGAAAAATAATAATGTTAAAATTTGAAGATATTATAATCTAAGAAAAATATTTTACAAAGATCAAAATAAAAAACGTTACGTTTAAAATAATAATAATAAATTATAATTATAAAAATATAAGAATGAAAAGAATTATAAGTGAATGTTAAAAAATAAATGACAAATACATTTAAATTTAAAAAATAGAGATTTTGAAAGTGACACACACATATATATATATATATATATATATATTAAAATTCAAAAACTATAATTTAAAAGATAAATAGGATTTAAAATTAAAATATATAGGTGGACAATTTTGTTCTTCAAATCTAATGCAAGGTTAAATGCAAAGCAGTGACTAATGGACATACAAAGGATGGCATAGAGAGGCATCCATTAACCTTAAGGATGTGCCAATTACGTACAAGATGAAACTTTGAAATAGTGATGAATAAGTTTTGTTCTCCAAATTTGATGGATGATGCTTTGGATCTCTAAATATTGAAGTACTGCCTCCCATGTTGGCTGCTGAGGATAGAGATCAATTTAAGGATGTACATGTCTCATATGAAGAGTTTAGAAATGCTGTAAACCTTGGAAATGATCTCTTATGGTTTTTGTGTTGGGCAAAACTATTGGATTTTGATCCTTGAAATTGAAACTAAAATGTGACTGGGTAAGGAAAGACTCCATTAAAATTATTAACTTGTCCCAAAATTATTATCAAGTCTTACTCTCCTTCCTAGAGGACTATAATAGAGAAATCTTTGAAGGGCCCTGGATAGTGGCAAACCACTATATAATTGTGCAAAGGTCGAGAACATTCTTTATGGAAAACGTGGATGCATTTACCAAGATAGTTTTATGGGTAATTTCAAATCTACCCAATGAACTATACAATGATGATTTTTTGGGTAGGGTTGGTGATACATTGGGGACTGTGTTGAAGATTGACTAGTCACAACAATTCAAGAAAATGGTCGGTATGTGCATTTATGTATTGAACTCGATCTAAACAAACCTCTTTAACTAAAGATCATTGCTTGAGGGCACTTATTATAGTTACAATATGAAGGACTCCATAAGATCTGCTTTAAGTGTGGGTGATATGGACACAAGGAGTCATGAATGAAACGGTCCATACGAATATGAGTGGCAGTGCAATAGTTCCACGTCAAGCCCAGGAGTCGACCATCATGCAAACGAAAGCCTCATATGCAATAAATGTCAATAAAATTGTAACTAGTGTCGAAACGAATACACCAAACTATCACATAATTAATATGACCGTTAACATGCAAGAGATAACATCTGTGACTTATGGCCATGGTTTTTAGCCAAATTTTCAAGATGCAAATCTTGTGCCAATGAAGCTTCGTTCATTCCAAATGGATCACGTATTCACCAATTGTAGCAGGACAACACACGCCTCACTGAAGCTCCAAATCAAGTATCTGAGATGTATGCAGAGGTTCTAGCAGCTTTTGGGGCAAGGCCAAGTGCAGCAAGTCGACAATGCCAAAAATAATCTTGCACATTCAAGAAAAGTCACTTTGCGACCCAAGAAGAACTCATGTACGCCTGACCAAACAAAGGCTTTATGTGTGAGCTTTGCAACTCTAAATGGGCATAAATTCATGATCGCAATCAAAGCAATAGGGAGAACGAGTGCGAAAGAGGAACATGTGAACCGACCCACAAAAATAAGATTGCTTCATGCTACTAGTACATGACCAAAATCAAGCGAATAATGAGAGTGAGAACCTCTTGAAGAATTGAAGATCATCCACCATTATCAAAGGATGGGAGAAAAGTTTGTGTTCGGGATGCGCATCTAGATGAACCATATGCAGCTTCTATTACGACAACCCAAACCATCACTGCCCAACATGGGGGCGTCTGACAGATGCACAGATGTGGAGACTGCTTGCAAATGTGTATTATTGATGGATGTTTCCTCAACTATCCCTCATAGAATGGCTGCTTAGGCAAATGACATGGGGAATATGACAAGTGCTTATAATGAGCGTATGCATACTTCTAGGATAGAGTTTGATAGAATGGAAGTGCATTCAGGTCATGTTTGTTTTGGAAACCTAGGCAAACAGTAAAAAAGCTAAAAAAATTGCAACTAGACTGGCTTTGGTAAGTGGCACATTGGAAGCACAATTAGGAGAGTTAGTGGTATTTAATAAAGGTTCTTGCTGAGGATTGTCATTTTTTCACCTTAGTGTTTGTTGGGGAGACAAGCCAAATGGTTCCTCACAGTTGTATATGGAAGGCCATAATTACAAAGCATATCTTTTTGGGAGTAATTGAGTGAGATTGTTGTGGAGTGTCATGGACCGTGGGCCCTTATCAGAGACTTCAACTCATTGCTCAAATAACATGAACATGAAGGAGGGGATGCTTCACCTTCTTGGAGAGGTATGCATGGCTTTGTAGACTTTGTACAAACTAACCATTTGCTAGATGCAAGATTCCAAAGACATGCATTCACATATAAATAAGACCAGTTACAAAAAAGACTAGACAAAATGTTGATCAATATACCACAACATCTTTGATTCCAACAAGTTATGTTGCTTCACCTTTTCATACTTCAAATTTGATCATTGGTTGATTCTGATAAGTATGACTAGCAAGAGAATTATTGACTAGGGTAGAAGATTGTTTCGGTTTGTAGCAACTTGGTTATCTCACCTGAATTTTCACCAATTTCTTACAACAGTTCAGAAGCCCAATGATATCTGGCATGAGAAGATACCCATACTACATAAAGCTTTAAATATGTGGAATAGAGACATTTTTTAAAATCCATTTGAAAAGAGGAGAAATTTTATCAATCAAGTATATAGGATAACTAGACAACTGGTTACATCTCCATCAAACTACTTTGAGGAGAAACATTAATATATCTAGAAAAAATATATACAAGTTCTCATGGAAGACAAATTGCTATGGTTTCAAAAGTCTCTAGCCAAGTGACTCACGTCCAGGGACAAGAACTCTAAGTAATTTCATGGAGTCATTATTATCCGCGAGAGAAAAAGTAAAATTGAGGCGATACAGGACGATGAAGATAATTGGGTAAGTGATTCTGACAACTTGGAAAGGTTGGCCAATTTGTTCTTCATCAAACTCTATACCAAAGAAAACCAATTTATACATTTAGTAGTTCAGGGGGCTTTCTTATCACTCTCGAAAGAATAATGAAATGTTTTTAATACACTGATGTCTCATGTGGCAATTAGAAAAGCTTTATTTTCCATGGGTAGTTCCAAGGCTCCGGGGGAGGATGATCTATATAAGTTAGCTTTTACAAAGCAATCTGGGACATTGTGGGCAAATCCTTTTATAAGCTGATTAAATAGGCATTTGCAAATCCAAGCAGAATAATGTACAACAATTATACACTCATATATCCCTAATACCTAAAATAAAGACAGATACATCAATAAAACAAATGAGACCAATTAGCTTATGCAACGTTTCGTACAAGACAATCACGATGATTATTGCCTTGCAGTTACTATAATGCAAAAATCGGTTAATCCCTGCCAAAACAATTTAATTCCTCTATGGAGTAGTAGTGAAGAAATCATCATTGCACAAGAGACAATTCACTCAATGAAGCAAAAGAAAAGGATTGGGGTGACATTACCATTAAAGTTAATTTAAAGAAGACCTATGATATATTAAATTGGGAGTCTGTCAAATAGACACTATATGACATTGGATTCCCATCATCCTTCATCAATGTTGTTTGCCACTATATCTTCTTAACCACATGAGCTTATCATGGAATGGGGAGACATTAGACCTTTTCTACCCTCTAAGGGATGTTTGACAAGGTGACCCATCTTACCATACCTATTGTTCTGTGTATTGAATGTTTATTCCATATGACAAATATTGCAGTAGATAAGAAATCGTGGAAGCCAACCAGACTTTTAAGAGGAGGGGAACAACTAACCTATTTGGTTTTGCAGTTGATATCCTTTTCACCAAAACATTTATGGAACATGTGGCAGTCATCAAACAGGTCCCAAATTTATTTTGTAGATGCTCATGGCTAAAAGTTAGTTAGGACAAGACACAATTATTCTTCTCTACAAATGTTAATTGGTAGCGACAAAAACAAGTATAAAATTAATTGAGATTTGAGAAAACAACAAATATGGGAAAATACATGGCAATCCCTCTGCATCATGATCACATCTCCAAGCAGTCTTATCAGTTTCTAATTGATAAAGTGCAACAACATTTAAGTGGTTGGAAGAGAAATACTATCTCTTTTGCAGACCGCTTAACTTTAGAGAAATCAGTTGTACAAGCAATGCCAACTTATGCAATGCAATCAAACTTATTACCAGTTTTTGTGTGTAATATTATTTATAAAAAAATATAGAGATTTTGTTTGAGGCGATACTAATAGGTCTATAAAAGTTCACTAGTTGGCTTGGCGAAATTTATGTATTCCTAAATAATGAGGTGACCTTGGTCTGTAGACGATGCAACAGGCAAACCAAGCCTTACTTATGAAGTTAGGGTGATACTTACTTACTTAAAGACAAGTCATGTGGGCCAACTTGTTTGGTTCAAATACTAATGGTGGGGCAATCAAACCAATTATTGATACAATTGAACAATTATCAAATTTTTGGATGGCATAATTGTATCATGGTAGAACGTCTGTAGGAACTTAGTCTGGTAAGTGGGAAATGACAAAAGGATAAATTTCTAGTTGGATACTTGGGTGCATGGTCGAGGACCTCTTGTTGGATGATGTATGCCAAGCCCTATCTCTCTATGGCTCTTAATGGAACGTGGGATGTCCTAAAATTGGAATGTCCATTGCCAACTTATGTGGTAACAAACATTTATAAAATTCAACCACTTAAATGGGACATAAAGGATGTTGCTCCTTACTATGAGAATGAATTGGATGGTAATTTCTCTAATAAATTTGCCTAAAGGTTTGCTCGGTAAGACCAAAACCATGGGAGACCCATTTTAAAACAAATATGGAAATGGGAAAGCCCATAACACATTTGTGTTTTTTGTGAAAGGTGGCAAGAGGTATCATACCAAGCAATGAGTTGAGATATGACAATCATATGACTACCACCATTTTGTCCTCACTGTAGCTACCACATGGAGACCATGTTGCATGCACTACGAGATTGCAACTAAGTTATAGGCATTTGGTTGAAATTGGGGATTGCTAATATTTTAAATTTTTTCTTGCATAAGTTACCGGAAGCGTGGCTACTTGGTAATCTGATATGCAGGAAATATAATGGCATTGATAATTGAGTCAATTATTTGGGGTTGGTCTTGATCGGTGATGGTATAGGCAAAATGATTTTGTCTTTAGTAACAAGAGTCATTATGATCAACAAGTTGTCAATGGTGTAAAATGTCTATTTTGTGATCTCCACCATATACATGAGTTGAGGACCATGATGAAAGATACAAGTGCGAAATGTTCTGATTTTTTTTGCAGGTTAGATTGGGAGCACCCTTCGAGCGACACACTTAAAATCAACTATGAAGTTGCGGTGAGATACTCACGCTAAGATGCTGCAATTGGAGGTGTGGTTCATAGCAAATGTGGTTTCATATTTGATTTACCTCTAAAATTTCTTATTGAGAGGTGGATAAGACAAAACTTTTAACCATTTTAAAAGCTCTAGAAATAGCTCATGATCATGAGTTCCAGAAATGTGTATTTTCTTATACCAAAGGTAAACAAGAGATGATTTTACAAAAATAAGTTTATCAATGACCCAAGAGAAAAATGCTCTTTTATTCTGTTTCCCGTTTATATGAGCTGATCATGCAAATAAAATTGTTGGTGGCTCCTACCATTTACCAAATAAAAATGTAGGTTAATATTTTTCGAATGAATATTTTGATAGATATATTTTTTATAATCATTATCTATTTGTTGAAAGTTACCTTATCATCCCTTACAAGTTATGTAAGTCCCCAAAACTACATTTGGTCTGGAGCCAAAACCCCACTTTGGCGCGAAAACCAAATATCAGCTTTTATATTCCCTACTTTTTTTCATTTCTTCTTCGGTTCATCCACTCACCACACCAGAGCAATTAGGGTTTGTAGATTCCACTATTTTTATCACAGATCTCACGGTTTCAATCTCTGTTTCCCAGCCGACAGAGAAATAGAAATGGCAGCACCGAGGGAGATAATCGATGTGGACGCCGAAAACTGTCCTACCCCGCCTCCTCCTCTTCACCCGCAAGATCCGAAATCGAACCGCACCAAGTCCACCACGCGGAAGCGAAAGAAGGTTCCGTCGGTGCTGCAAAACCTAAAGAGCGTGGAGGAAAAACAAGCGTACCTCGAAACCCTCGAGAAGGAGCTCGACGCGTTGTTCAGGTATTACAAAGAAGCCATGGCTGCGAAAGTGCGCGTCGATCTGAGTCAGTGCGGCGGTTCGCGAAACGTTGTCGTTGCGGCGCTGATGGAGGAGAGCGACCTTCCTCTGTCGCGGCTCGTGGACGAAATTCTCGACAAGTTAAACGGAGAAATAAGTAGCGGCGCAGTCGTGCTAGCGGATAGTGTGACCTACGCGACGGTGAAAAGTAGCGTGTTGTTTGTGGGACAAAGAATGGTGTACGGCGTGCCAAATCCTGATGCTGATGTATTGGAGGACCATGTCGAGTCGTGTCTCTGGTGTTGGGAGGTGATTGTGGATTATGGGTTATCTTGATGTTTGTTACATTAGTTATCAAATTTCACATTGGGCGTGATAGGGATTGTTATTTGAATCTAGACTAGATTGACACTTGTTTATTATTGATGGACTTTCCATATTGGTGTTGCAGACGAGGGATTTGAAATTGTTGCCAAAATCTGTTCGAGGACTGCTTGGAGTTCGACGCACTTGCCGGAGAAGGATCCATGAGAGGATTATGGCTGTCTCTGGTACTGTGTTCTCTCTCTCTTGTAGCTAGTTTTGATTGTAAAATATACTTCGATTATGATTAATTTGATTAAATTACTTTCTTGGAAGAAGAATGTGTGGGCTCTTGATTCTTGATGTTTATATTGTAACATTTTGTATTGCAACTTTAGATAATATATCTATTTTGCATTTTAATTTCTGATATTGTAGTATTTGTTGGTTTGTTATTGCTTATCTATCTATATATTGCCACCCTGGATGTCTTGGGATTCAATGTTGATAAGATTACTAGTTAAATCTTGAAATTGCACTGTTTTTAGAATCTCATGGCTTTCTTTGAACTGGATTGCATGTTAGATTGCTTCTCAGTGGGATCAGGCAATTTTCTCAATCTTGCAAGTTGCGGGGGTTGGATGCTTAGATTGCAACACCTGCATGTTTTTTTGCCCCTTTTTGTCCTAAATCCAAGTCTCTCGCTTGTCTCTTTTAGTTCTGAATTCTTCATTGTGTGTGGCTGTGCTTTGTTGTTGGAGTGGGTCACATTCCTAAGCATATCTCCCTCTTGTCCCTTCCAAGTCTTGATCCTCTTTGCTGTAATTACTCTTGGTGATTCTTCTTGTTTTGGTGGCTTGGTTGGTGATGCTGTACTTCTGTCTTTGTTTTGTAAGAGCTGAAAAGGGCTTTTGCTGGTGCACAAGGTGATAATGGGACAGGAACGGAGGGATGGTGGCAGCAGAGTGGAGGATGGTGTATAGAGTTGTCATTGATAAGATTTTCATCTTTACTATGTATATATCTATAAATTAGTATAAATGAATAACTTTATATTTTGATAGGATTTTTACAATCATTGTTAAAATCCTGCAACCTCCTTCCCATTGTAAGTCAGATCCCAATCTTGAGAACATTGTTTAGTTAGTATATCATTCATTTCTTGAAATAAAGAGAACAAGGTGTTGCTTATATGAAGCCTTGCTGTAATGTAAAATTGTAACTTTGTAAGTGCTGCTTACACCGATCATCACAATTTGCAAGTATCGAGTTATTATGTACCTTGTTATTCATTTGGTAACCAATTACATGCTATAATTACATTTTATGTAATTATTTTTTTGGTAAGAGGTTTAAACGTGAAATTGTGAACTTATTTTAATGTGGCGTTCAAGTCATAAGTATTAAAGGCTACAGTGGCTGACAATTATGCTTCAGTTTGCCATAATTGACATTTATAGTAGCGTTTCATTGTATTTGGTTATTTTATGAGTTTTTATTTGATTAAGTTTAGGGAATAGAGTTGTTTGCTTGTTTAATGAGTATTTTGCTAAAATTGGGTTGTTTTTCAGAAATGATAGCATCTCTGAAAAAGCTAGAGACTGAACCAGATTACAATGATGGATTAATAAAGGGATCAGCAAGCCTCAGTAAAGCTTTTCCTGAGGCAGATATCCGCTTGTTAGTAGATAGCTTGTTGCAGAAAAACAGTGAAGACATGTACATGAGCACATGATTCCAGACTTGTTTTGCTTGTTGTCTCAAATATGTAAATTTGTATGATGTTTGATTTGATTTTCTAATATATAATTGCAGGGACAAGAAAAGAGCAAGCCAAGAAAATAAATTGCTAATTAAACAGTTGGAGAAAAATAGAAGAGAGGCTGAGAAAGAGAAAGAGAAAGAAAGCAAGCACAATGAACTACAAAGAGAAACACTGCTCAATGTAAGGGCTGCTTTTTTTATCCTATTGTCTGTTGTTTATAGCTGAAGTTGCTTCTTCCTTGATGTTTTTTTGTTGGCAGTGCAATCATGATTAACATATGTTCAAATTGATTATTTCCATTAACAAGATGTTGAAGATAGTTGACTAAAAAAAGAAAAAGCAACCAGTATTTGCTGGAGGTTTTAAGTAGGATGGGCACTTAACTTGCTGACAGTATTTTGTTGTGAGTTTGTTGTATTAGATGATATTTGTTATAACCAACAGTAATTAATATAAATTCTTAATTTTCTGAGTAAAATAATTGGAGAAAAAATTGAAAATAGATTTATGTTTTTACTGTTAAAGACTTGTTTTCTCCAACTGCCTGATTGTTTTAGGAATCAAATTTAAAATTGTCACAAGAGGAGGCAAGAAATGATGAGAAGAGTTGTGAAAAGAAGAAACAGCATAAGAAGCAGGTAGATGAAGCAGAAAAGGATCAACGGCGTCGAGAGAAAGAAGAAGCTGAATTAAAAAAGAAGCGCTCTTTACAAAAGCAAGCCTCAATTATGGAGCGATTTTTGAAAAGAAGTAAAATCAATCCCCCATCTCAGAATGATAAAGTTTCAATAAAATCAACTGCATCTGATTTGTCAAGCAGCAAGAGTGAAAGTTTGTTTGAGTCAGCTACTGTTTCAATGGATTGTACTCTTGCATCAAGTAGCAATGTTACACTTGATGATATTCGCAAGTAAGCTTCTTTTATTGTTTTACCATTCTTTCTTATACCTTCTCGTCTGTTTTCAGATCTTACTAAAAAGATCTCACTTTTCAGGTCACACTTTTCTTCATGGCACCGTTTAGGACAATCACTTCGTTCAAACAGAAAACAGAGATGGGGCTTACGTCAGAAACCTAGGACTGAAGCTTTTAAGGAACTTAAGCTGACAGCTATTAAAACTGAAGTTCATGATGAGTTGGACATGGAGAAACATGTAGACAGATTGGGAGAATGTAGTTTTGATAACAGTACATGCCCAATGAATACAGATAGTTCTCTTGATGCCAAGAAGTATAGTCGGGGGAGACAATTATTGCAGTTTGATAAATCTCATAGACCTGCGTTTTATGGTGTTTGGCCAACAAAAAGGTTAGATTGTGTTTGATGTTTTTTTTTTGGTTTGACATTTAATAGGTACACTGTATATTAAAAAATTGGAAACTCCAATAATTAAACTGTTATACCTGACTCTAAATTCTAAATATCAGATATTTTGTTACTGCTGTTAGGCTCATTTGCTGGTTAATAATAAACATCTACTTTAGAACTAACATCAATAATTTTGCTCTTGTATATTATATGCATTTCAGTATTTAGTTGAAATTGCTTATGAGTATTAAAATATGTATTTATTTCTAGTAATCATGTTGGACCACGCCATCCTTTAAGAAAGGATCCAAGCCTGGATTATGAAGTCAGCAGTGATGAGGAATGGGAAGAGGTGCATTGAATTTTTGTATTTAATTGAATTAATATACAAATAGATGTCATCCATATGATAACGACATTCTGCCTTTATAGGAGGAACCTGGCGAAAGTCTTTCTGATTGTGATAAAGATGAAGAGGAATGCCAAGAAGAATGTTCAAAGTCTGATGAAGAAAGTGAAGATGGGTTTTTTGTACCAGATGGATATCTCTCCGAAGATGAGGTTGAGGATTTTTACTGTAATCAATTTGTGTTTGTTATTACAATGTTCTGCATTTCTATGATTCTTAGTAAAGGAGCGGTGTTTGGATCTTTTGATGTATCAAATATTCATGCATGGTATGTAGTTTTTGTCAGCCAATGGCAAAGACCTGGGTATGTGCTAGATCAAGGGCTTGTTTGTTTCCTATTTTTAGAAAATTATTGTCTGTTTTGTAAACCAAAAAAAAACTAAGTAGTTTTTGAAGTTTTTTTCAAAGTTTTTTTAATTTATAGATTTTAAAATAAAAAAATATACTTTTGTTTCCTCACTCATTCTCTAAAAGGGGTTTTAATCACGAACGCACCCAAAATCTTCACACCTTTCATCATTAACTGTTGTACCAATAACTTGCATTTGTTTGTGAATTTGAAAGCCACTACAACTGATAGCTCACCGAGCTGTAAAATTTCTTTTATCTATATGTAGGGTGCTCAGGTGGACAGAATGGAAATAGATGATGGCATTGAGGGAGCTGATAGCTCACCTAGCTGTAAGAATGACACAGAGAGCGAGGAGTTTTTTACTTTACTTCGGCAACAGAAATATCTAAACAATTTGACAGAGCATGCTCTCCGGAAAAATCAACCCTTGATTATATCAAATTTGATTCAGGACAAGTTTTTATCAGATCCTAATTTTAGTGCTACTCTTAAGCCGGAGCAGATGTGCTTGCAAGCCTTGAGTATGTACTTAATTCCTGGAGGCTCGTGTATAGAAATATCTATGGATCAAACAGAAGAGGACAAAGAAGTCTGCCTCGCTGTTGGTAAAAGTGGTGCCAGTCCAATATCTGGAGTAACTGTCATACCTGACTTGGACCTATCCACAATAGTAAGTCGTGCATTTGTGTTGCATAATTATAAAACACTATCAAGATGTGTGTGTTGTTTGCTAGACTCAATGTAGTCAAAACTTTAAAGTCAAGTTAATTGGGGATCAATCAATAAAAAATGTAAGTTGAGCTGATACTTGCCAGATGCAGGTTGATTTGGGAGAGCTTCCCTTTTAATTCTCTCATTATTTTGTGGCTATTTATGGCATATCATGCAAGTTTTATCACATTACAAAGATTTTAATAACTTTTCAGGTGACTGCTATTCAAAATTGTTCTCAGGGTATGAATAAAGTGTTAGCATCTTTGCAACAAAAATTCCCTTCTGTATCTAAGTCCTCTCTGAAGAATAAAGTGCGTGAAGTATCTGACTATGTTGATAACCGTTTGCAGGTTTGTATAGTGGAGATCTTACAATCTGGCAATTGCTTCTAATTTTTATATTGAAAGACATTCAAAATTAATGATTTAAACATAATTTGCCAGTGCATAAATATTAACTATCTTGCAGCTGAACTTTTTACAATTGTAGTTAGTCTTGATCCTAGGTGTTGTGTAAATAGCATTTCTTCCCCCCAAAACTCTTAACGCCATTAGGACTTTCCATGAACTCAGCCTAGCCTAGATGGGCCGCTGGGTAGATATAGTGACAGAAATGACCTACATGCATTTGATCAGCAATGAACTTGGGTGGTTAAATATGGAGTAGACATGCCATATGTGATTGAGATGAACCATATGTGATAAATAGGACTTTCCATGAACTAAGCCTAGCCTAGATGGGCCGCTGGCTGGATATAGTGACAGAAATGACCTACATGCATTTGATCAGCAATGAACTTGGGTGGTTAAATATGGAGTAGACATGCCATATGTGATTGAGATGAACCAAAGCCGTGTGATAACTTGCAATCCAGTATCCATTCTTTTATCAGCAGAGCAGTAGGTGACTATTGTTTACATTATTTGTATAAAGGTTGAATAATTCCTACCAAAACTTTCAAGCTGGTTCCCTCACTATGGTCAAGAAATGATTCATAAAGTCAATTGGGGATCCTCTATCATTATTTTCATCCTGGATTCCAAAAACAGATTATTTGAATGAACTGATTTTTCCTTCCAACGATGTGCCTTCTAGTGATGATGTCAGTTTGTATAAATATATCAAACCAGTCTCGTTTTTTATAAAATTTTGTCATTTAGATGCTAACATTTAAATGTTCAGTTTGTGGGTCATGTGCTGAACACCATTACACCAATGCGGTTCTGTCTCATTGTCTGTCTAGGGATAATATATTTAGAGCATTGTGATTCAGTCTGAGTGCGTTGTTACCTATTAATATTATGCTGAATTTTATCTCATTTTTATCCAGGTGAAGAAAGAAGTTTTGGACAAGCTGGGCCTGGCAGTTAAACCTGGTATATGCTTATCGTGATTTTCTCAAACACTTCAGTGTAAGTTTTGATATTTGTTTCAATTCTAAATTATGTTTGTTGGTTGAACTGACAGAAAAAAGCAGTGGGGGACCGAGGAGTATTGCAGCATTTTTTTCAAAAAGGTGTTTGCCACCGGCTGGTCAAGGTGTGAAACCTGGAGAAGTTTCACGACTACCATCCCTGAAATCATCTTCTGCCATTGATGAACGGCCGCAAAGTTCATATAATATTTAATGTCTTGTGGCATTTTCCTACTCAGATTTTATATAGACTTTACAAAAGTTGGGGATGGTGGGTGGCACCTGATGCTAGCTTACCACTATATTGATAACCATATGCCATGCTCTCTTTACTTTGTTTTGCAAGCTTGGACTTGCTGAAAGTTTCTGTTAAATGTATTGTATAAAGAGGAATATTATTTGCACCATTGTTTTTCCAGTTTATTTTCTGCCTTTTACGCACTCGGTACTGGACTGATGTTTGTAGCAGTTTCAAAGTCGGCTTTAACTCGATCCATTATGGGTTTGGACAGCCCACGCTAGAATTTTTTTGTTCTTTCTAAATGTAGCACTTTTTCAATCCAGTCTACTTACTCAACCTGCAGGTTAAATGGGTTGACTTAATTAGCCTGCCAAGCGTGTAATGTGTTAATGATAACATCAATTTTGAATTTTGGATGATTGATTTAAACTTGGATTTCCTAATTTAGTACTTTTAATTATTATGAAATTTAACAATTTCGATGATGAAATTAAACTTAGTTGTTTGATTTATATTTTTTTATTTAAATTTTGTTATAATTTGGTCTGTTAGCCTACCCATTTGTAGTGGGTCAGGTCAGATTAATCTTTTTTAATCCACTTAGTTGATAACTCACGGTGATGTTTGTGAGGATTCACTATTATTCTTGACATTGAAATTGTTGGAGTTTTTTTAAACAGGCAAAAAGAAATGAATTATTTAATAGTAAAATGTTCAATGATTAGAAGTGATTTCACATTTACATGAATAAAAGAAAATAAAACAACACTACAAAGTACTGCATAGACATAAATTTTGTTGGAATTATTTGTTTGAATTTGAACCTAATTAATTTTATTAAAACTTGAAATAGATGGAATAAGATGGAGTGAAAATGATTTATTTGATATGATGTGGTATATAACTAAATCGTTCAATTAAAGTATAAAATTAGATTTAAAGTATATATTATAATATGTATTTAATATAAGAAATGTTAATATAAATATACTATATTATTAGTTTAAGAGTTTAATTAGTATACATTGTTAGTGTAATATGTGACTTTTAAAATATTAATTAGTAAGTCAACAAACTTATTATGACTAAAAGATTATGATTGAATGTCAGTGTAAACAGTGTATATCAATTAAACTCTTAATTGAATTAAATTTTAGTCTTTCTAGTTTAGTGTGTGGACAAATTTGACATTTGTAATTTAATTATTTAATTTTGGTTTATACATTTAAAAATGAGTAAGTTAGATCTTATAATTTGTAATACAATTGTTTAAAAAATGTTTTTCTAAAATATACGTTATGGAACAGGTTGAGATGACTTAAATTATAATTTAATCTTATCTGTAAAATATGTTTGGACTTAATTTTAGAAAAAAAAGTGAATCATTGATAGTATAAAGATTAAAAAGTAATTAGGATAAGTTTATTGATTTTGATAATTATTTAAAAAAAGTCATCATATCAATAATTATTTAAAAAATCATATCAATAATAATCATGCACCAAAATTTAAAAAAAAAATTGTTTCAAACAAGTAACAAAATGATAAAAAGATCAAAATCATAATTTATTCTAAATCTTTATTTGAAAATCATTGGCTTTGGTAAAATTTAATAACATTTAAAAATAAATTAATACTCCATTAGATTTTTTATTTATTTTTTTTAAATTAGTAAATACCATTTAATAGATTAAATACTTAAAAATTACTTTTATTTTGGTGTATCCTAGATCACAATAACTTTTTGAAAAAAAGTTCAAAAATGTTACTTTTATTTGTAAAAGAGTGAGTTAGGATCCTTTCCTATTTTTCTTTCTCAATTTCCTTCACTTACTAACCTTTTCAATAAATAAAGGTTACATTTTATAAAATTTACATAATTTTTATTTAAATAAAATTTTCAAAACTATATAAAATGTATAAGAAATGGATAAAAAGAAAATGAAGATGATCTATTTCCACAAAAGAATACATTGATATTTAATTGTAATCCTTGTGACTTTTGAAGTATTTATCAATAAAGTTCACAAACTTATCCAATTGAACATTGAATGTCAATCTAAAATATTTTTAGATAGTGCATGAGTATTAAACTAACTTTTTTAAGTGTTCACCCCAGCAAAACCAATAAACCTGCATACTACTAAGGTCCTTTTTGGTGCTCCTAATAACTATAAGTTTAAATTAGCAAGGGCAACGCCTAAGAATACATATGACAAAAATATCATCATGATTCATGAATATGAATGAAGGGAAGAATGGGGTAACTTGGTGGGCAGAAGAACAGGCCAAACCAGCACTCTTGTTGCCTCTTGATGGATCTTTAAAATTTGTTAAACCCGGCAAGCTTCAACCTATTTAAACACCGACCACTCAACCACAAATTATCCTATTCTTTTGGTTGCATTCAAAACAGGGATACTTGGTATATGTGAACCTTTGGAACAAGTTTTCATTCAGCACTTCTGGTTTTGCTGATAGCATGCGCCAACAACAAGGGAATTGAAATACCATACCCTAGGAAATGAAGTACTGGGTTCATCTCATAAGCTTTTAGAAGAGTTCTGCAATTCTGTAACAGAATAGTAAAGTAAATGACAAACTGAACATAACAAGAAAAGAAAAAGGAAAAAACTAAGGACAACCAAAAAATATCTTGAATTGCTTTTAGTGTTATTGTTCAACTAAAATCCAAGATTTATCTCAGTAAACTAGTACCAATCTTTAATGTTGACCTTTATTGTGTAGATCATTTAGGTGGAACTTCAAATTTTAGCATAGAGAAGTATACATAAAAGTACTAAAGTATATGCAAGGAGAAGTTTGAGTATAATTAATTAATTACCCTCCATTATACCTTACTGAGGTAGAAACCTCCGGCCATAGTTTTATCTCAGTAAGGTACATTAAGTTTTTTTTGGTTAACAGTAGTAAACCTCTAAAAGCACCTTAGGTAATGTATATATATCTATGATTCTATATTCTTTTTCATCGAATTTATAATTGCAATCCACGTTAAATCAATATTTTTATGTTTAGTTAATGCACTGCATTCTTTGCTAACTATCCTTATAATTAATCAACTTGTCTAGACTTTTGCCTGCATGGACCATACTGCAAATAATTAGTGCTGCAAATTATTAGATTAAGCTTTACCATAAAATGCTTCCAACATATTGCTAAGCACACGGCACATAGAAGCTTCCGAATCCATCGCTTGCTAAGGTGAGCATTAGATACCATGCTGCTCTGGTTGCTTTTTAATACAGATTTTCTAGAGTTCATATGAAGATCATCTTTTTTCTTCACCAAAAATGCCAATATATGTTCCCGGTAAATTGCTCTTTCAGCCGACAGAAAACCAGTAACCAAAATTGCTGGAAAAACCACAAATAATAGATGTGGAAGAACCACAACTATAACATCTGGAGATCCGACATACTCATGCTTCCCCTTACCATTAGAAGTCTCCACAACCCAACCCATATAGGTCATGTATACCATATTTTTTCCTTCAGTGAAAACTTCCCCCATAAACCAGGGGAATAATATAAGATAAAATAGGTATGCTATCCAACCAAACCATAATGTGCGGATCCTGCAAAGCTCCTGGAGAAACCATGATACGCCATTTAATAAGCCTTTATTCGCAATGAAGTTATCGTAAGTGTATATCTTCTTTGTGAAAACAAGCAGAGCTTTTGGAAGAAGAAGGAAGATGAACAAAAAGTAAAGAGCCGACCAAAATAAAGGATAATAAAGGGAAGCCCATTGACATCCCATGACCAAAAACTCCTTCCAGCTCCAAGAAAGTTTAAGGCTATGACCATTGATAGAAAATGGCCTCAATTCAGATAATGTTGATCTACCCGCACTGTCATTTGCTTCGATTTGAAGCCAAAATCTATCAGGCCAAGCATCCTCAAAGGCTTTGTAATTCCATGGAGCAACATAGAGGTTCCCCCTATAATTGTCATCAGCATGGTTGATCATAGGTGACTCTACAACTAAATCAAGATTTCCAGATCGTGAATCATAGATCCTAGCTACAACTGATACAACTGGAGAAAGAGAAAATACCAGAGCTCGAATTGTCTCATAAGATGAACGGGCTACAGATTGACATTCATAGTTGTGACGACATAAAGATGTTAACATGAAGCGAGAGTCTAATGGAAAAGTGGGTAATATAATTGCATGTTTGGTACCAGATTTGAAATCAACATCAACATACGAAACATGGCCTCTATCAATGGCTAAAATTCGAAAGGCTCTACTCATTCTCCAATCACCCATCTCCCACTCCCAAAACTCTTGAACTGGTGGGGCTCTCAATGAACAATTTACTGTACTTTCAAAAAAACTCCTGTGTATATTAAACTGAACAAGTTTCCGCAAGAAAGAAGAATGATCACTCAATTGATGGTGCCGCTTTAAGTTCCTACCAAATTTAGTATGGAGATGCCCACACAAGTAAGCTGATATGGAATGCTTTAGGAAAACATCTTCCAAGGTCCTTCCAGAACTAGAGGGTGCTGAAAATGACAGCGGAAAATGCCCAAAGGAAATTTTGGTAACTGGTTTTTCTGACTGAGAATCCCACTGTGACAGTTCCAGGTCTAAATCCTTTAGTAATTGATCTGTGGGATGCCCAAAAAGATTAGTTGGACCTCGTAAGCCGGTTGACATTGTGCTATCAAACCCAACAAAGAGATGCTTTCGTTCCCAAGTCTGTGATACAATGCAAGTATGTAAAAAGGAGTAAGGAAGAGCATCATAGCATCAAGCAAAAATATGAAAAATCAAGCCTACAATTTGTGACCTCTCAATTATTTAGTCTAATCCAAAATTCCAAACATATAAGCACATATTTTTTCAAACTGTGATTTTTTCATCGTTATCATTCAGAAGTGAAGAATATCTTGACCAACAAAAGTAAAGAGTTATAACTTATAACAGCTGAGAAAAATCCAATTTGTTGGCTAGTTCTAGTGAAAGCATTTTGCAGTCAGAAAACATATATCAGAAAGCATTTGTTGGGGGACAACTTTCATTCCTTGAGCTAGCTTTTGAGGTTGAGTTGTGCCTAAATTCACGTTCTAAGATCTAAAGTATTTTAGGGACCAATTTGCACAACCAAACAATCATTAGGACTCATTTACCTGAAAATTTATTTCAAAGATCTAAGTACCGATGCCTATAACTTTCAAGATTGTGGTTCTTCACTGTGGTTTTAATGGATACAGTCCTCCCTTCGATGATCTGAATGGAGTAAGAAATGATGAAAGCCCCTCCCTCAATTTTATTAATATTGATATTTAGTCTCCTAGGATTCAATTCCTCTAAAGATAATCCCATAAAAATAAAGAGTTATAACTGCTTGCAAGAAAAATCAAGGAACAAGGTTTTAACTTCGTCGTATCATTGCGCGCACATGTATTTCATCATTGTTTCCATGTCTCATCAACTATCAAAACCCTCACTTTCATGCTCCAAATGGAGACTGTTAAATGATCCATTTAAACTTCCGTGTTACAATATGTTTACAGCAATTATAGGAGTTACAATTGCATGTCGCATGTTCATGAATGGTTACTGAAATCAACTTCCATGTTAAATGAACCATTAACAACACCTTAGAACTTGTTCTTAGGTCAGGGAACTATTCCATTTCAATTTCATAGAACGATATTGAGTAAATGAACATGCGACACTGACCTCAAGGGTGACACTATTGACACTCTGATTTCTTCCTAACTGCCCATTGATGCTGTATTTAGAAAAGAAATCAAAGGAACCACCAACAAGTGGAACACCAAAATTGTCATGGTTGCCTCTGACATCAAAGAACAAGCTCTTCTGGAGTCCACTTTTCTCAATAACAGTGTCAAGTACTTTCTGGTATTCCACCCACTCAACCTCGTTCTGCTTCATTGTTAGCAAATCCTTGCTTTTACCATCTAGTAACATTACACAATAACATCCACAATCCAAAACATTAGAACAGAGTTTAATATTCAGACACTTCAAGTGTAAATTATACTATTGACTAATAAAAAATAACCTCTAAATAAAACTGAGAGTTTATTTTTAGAGTAAATTAAACTTACAATCCATAAAGTTGAGGTTTCCTCAAATTTCACCTAATATTTCCTCCCTTATTTACCTCTATAGTATACAATACAGTAGCATCTTTTAATTTAGCTAATTGTTTAAAATACGTTACATTGATATCTTCAGTTACCTAAAACACATTACACAGTGTATCCTGATAGGGGAATTAGTGTATATGTTAGAAAAGTAGGAGGTCATGTGCTCTAATTTTTATGTATTGTCAATTATAAAGAGAGGACGAGTCCTAACATAAGAGTCAAGGTGTGTTTTGCCAATTGATTGGTCCTGAGTTCGAATTAGGAAACAGTTTATTTGCATATATAAAGACAAGACCTGGAAGTTGGAACTTGGAACAATGACCCTCTCCATATTTTTGCAAAGAGAGCCACAAGGATCAGTATAAAGATTTGCAGCATATCGACAACCAATCAGTTAGTTTTTGGGATCAGTATAAAGATTTGTACATTCTAACTAAATTTTAACTTATAAAGCAGTAACTAGAAAAGTGAAGAATCATAAGGGAAATTATGATTAGAGTATGAAAATGAATTAAAGGTGAAATCTAAGAAGAAATGGTGAAGATGATTGTTTGAGAGGCGAGAAAGTTGAAAGGAGGAACCAGTGAGGTCGCCAGTGATGAGGACGAGGGAGGGGTTGATGATGGAAAGAGCAGGGGCCACCAGTTTGGCGAAATCGAGGGCTCTGTTTGGATGGTGAACGCTGAAATGAAGATCGGAAAGCTGAACCACCCACACCACTGAATCAGGGCCATGACTAACTCTTTCATTGCTTGCAGCAGCAGCAGCTGCAGCTGCGCAAATGCCACACACAAACACAAACACAAACGTAACAGCAACGCCAATAAGCATGCTCTTGCTCTTGCTCTTCATCATTTTCAATTCCTCATTCCACTGCACTCAAACTCAAATCATGTTCCTCCTTCCACTCACCTATTGTGTTAATTAATAATCTCATTTCACTTCAACTACATTATAAATGTTTATTTTATAAAAACAATAATAAACAAACACTTTTAAACAATACAACATTATTTTTAATTATTGATAGTTTTTTATAAAAAAAAAAAGCATTCAAAGATATAAAATTTTCTAAAATTACTCTTTCTCATTAAATACTTCTTAAAATATTCTCCTTAAAAAATAAATTTCATTTTATTATTACCTATGTTAATTTATATATAAATAAAAAAAAATAATTTTATATATCTAAATAAAAAATAAACCCTTAAAATCATGGTATCGAGAATCATTTTCCGTTACCTGTATACCTTGAACGTCAAAATACAAACGATCTCATGTACTTTATCATGCATGGTGCACGAAGCCTACACAAAACTAATTAATAGACACATAAATAGAATATGAATAAGAGATATATTATATATAATAGCAGAGTGTAATTAGTATTATATATGATTAAATGTTGATGAAAAGCTTTTTTTATACTAACAGATAATTAAACTTTCTCTCTAGACACATGAATAAAAAGTTGTTTAAGTTTAATAAAAAAATTTTAATATGTAATTATATTAAATTATTCAAAGAGAGTTTATTATCTATAATAATACTATAAATTCAAGCAAGATTATCTCAATACTTGTAACTAAACAAATAATATTTTAATAATTAAAATTTTAATTATTATTTTTAATTTCAATACTTCTCCGTTCTTTGGGTGAACCAATCACCCATGTATGAGTCTTGGAGATTTATTTTTGTGATGTATTTTCTCGTGTTCTAATATAATAATAGACATTTATTTATATTTTAAATAACATATTATCTACTAAAATAAAGGATTATGATGAAGTATATATTAATTAATTTTTTACTGTATATGAAATTTTATAAACTTAATATATTTTGTACAGATTTTTAACTGATCAAATTCGTATTTAATTTAAAATAAAAACCATTCTATGGTGTAAGTGCCGAAAATTGATACCGACATCAATCAATTTTTCATATTCCAAGAAGTTAATTTGCATATATGATCTTTATAATATTTTTGGAATGCATATCACAACACTTTCACATTGTTAGTGGCTGCGTAATGTACAAAACAAACAATTTTACAATTTCATGTAAAAATATCTTTTTATAAGCAAAAATTATATTAATGAATAAAAATACAGATGAACAGTACAAGAGATGTTATCCGTCCATAAATGTACAACCCAAACACAAACTAAAATAAAGTGACAGGAATTACGAAAACCTTTCTATCAAGATAGAAAAGACTCTTTATCACCACATTTTTGTCATATAAAAGAGAGAGTTCATGATATAAAAGAATATGACTTGACTTTGGCTACCTGAGAGTGATACCACTCTCAAGAGGATAATTGTGTCGCTTCGATAACATTTACGTGAGTTTTGCACTAGAAATCGCATCATTCCTTTTTAGATATTTTAGAGCCCAACAAACCAAACATATAACTCCATGTTTGTCTCCTTCTTTGATTACTACACCCCTAAATTGAAGAGATAATAATAATAAATGTATAATAAAAATGTACGAAATGTGTTCGTTCCTAATCCCAAAGAGCTAAAATCCAAAAAAAATAAAATAAGATCAACTATTGCTTTTGGCTTTGTGTTTTTTTTATATAGAACAAGAGCTTTAAGTAAAAATTTTAAATACATGATAAAAAATGAGTTGGATATGGGATATAGATGACAAAATAGATCCAAACCCAGTAGCTAGGGATGACAAAAGATTCGTACATGCGGATATCCCCATATAAAACCATAAAAATATTTGCATAAATAGTATAAATGGGTAATCATCACTTGTGGATAAAGATTTTTTTCTACTTCTACTTAACAGGAAAAGATATCACAGTACTCGTATCCCCGAGTACCTGCTACTCATTAAACTAAAAATATTATATATATTTAAGTTGAAGAAGATAATATTTTTTTGAAATAAATTAAATTAAAATATTAATTGTCAGATATCATAATGATGCAATTCTCCCTGACATGGACCTTAACTACGGGGATGGAGGACAACATGGTAAGGATGAAGCTCATTGAAGACCTTAAACCATAGTTCTAAATTTAGTTTGCTTGTAAATATTTTTATTTGTGTTAGTCAATTAGGAGGCATGCTTAGTCTTCATTTAGGCCTTGTATTTTTGGCCATTTATTTTGTTTAGAGCATGAAATGTCATGAGTTATTATGTGGAGTGTGTGCAAGAAGGTGGACTCTAGAGTCTTGGATATGTGGTTTCTTCTGACACCCCTTGGCTTAGTTCTATACTCCTCTAGTATTCACAAAGCATGAGCAACACATGAGACCCTTTTGTCCCCTCTCTCAGGTGCTAGATGAAGTAAAAATGAGACGAGATTTATGCTAATCTTGGGCGTTGGGATTAGGCAAGGCAACATTGTGTTAGTTAGCTTTTAAGCTAATTAAACTTGGTTTTCGTCTCCTAATCCACATGCCTCTTTCCCTATAAATAGCATTCACCCCTAATTGTGTTTTTCACACTTGAAAGAATGAAGTAAAACTTTTTTTGAGCATTTGATATAGTAAAATGTCATTTGGATAAACCTTTCTTTGAGGAGTCTCTTCTTTAAGAGCTTTTATCAAGAGCCTTCTCCTTTGTGGTAAGCATTCTAGTTCAAAACTTATCTCCCCTTATGGAGTGACGTTTCCACCTTCATTCATTGCCTCTTCCATCATCTGGAAGCTTGGAGCCTTGGAATGAAGTTGATTATGGGAAGTGGAATGAATTTGATTATGGGATTTAAGTATGCTCATAGATATTTTGTACAGAAGTAAAGGTTAAACAAGCAATATGGGATTGTCATAGCTTCAAGTGCCCTAGATCGGATGATTTTAATTTCAAGTTTATCAAATCTTTTTGGGACATTTTGAAATAAGATATTATGTGTTTTATGCATGAGTTCTACTCTTATAATTTCCTTCCTATGGAGTGAAATTCTGTCATCATTAATTGGTTCCCAAATGCAATAATTCACAAATACTTGAAGAATTTAAGCTTATATCTCTAGTGGGCTCTTTGTATAAGATTTTAACAAGGATTCTGGCTAAGAGAATTCAGAGGGTCATCCATAATGTAGTCAGCAAATCTCAATAAGTTTTTATAGGCAATATGAACATGCTTGACAGTGTGCTAGTTGCAAATGAAGTTCTTTATAAAGCTAAGAAGTGTAAAAAAATTGTTTGATCTTGAAACTTGACTTTGAAAAGGCATATGACACAGTATGCTGGGACTATCTATACTACATCATGGACAAAATGGGATTTAACAGTAAATGGATTGGATGGATTAGACAGTGTAATGAATTAACAAGAATATCAGTACTTGTAAACGGGAGTCCAACCTTTGAGTTTCGTCCCACTAGAGGGCTCAAGCAAGGTGATTCATGGACACCACTCTTGTTCTTTTTGGTGGTTGAAGGTATTGCAACTCTTATATCGCAAACTTCATATAAACTGTGTGATTACTATTAAAAGTATTTTGAGGTGTTTTGGGATGTGCTCATGACTCAAGATCAATTTCCATAAAAGTTCCTTACTAGGAGTTAGGGTTTCACTTACGACAGTTAATACATTTGCAGGAATTTTAAATTGCCAAGTCATGTCAACCCCTTTTATCTACCTTGACATTCTAGTGGGAGCAAATTAGAGATTGACCCTTACTTGGCACCCGGTCTTGTATAAAATTAAGAAGAAGCTGGTTGGGTGGAAAACCAGATTCCTAATCATGGCAGACAGATTATGCCTGATTAATTCTGTCTTATCAACAGTTCCTCTATTCTACTTGTCTTTTTTCAAACTCTTTAAAAAACTGGAAAAAGGGTATCACAACCATCATGAGGAATTTCCTGTAGGGAGGACTCGAAGATAAAATAAGTATATCTTGGGTCAAATGGTCATCACTTTGTCAACCTAATTAGTGGGGTGGTTTGGGCATCACAGATCTACCAAATTTTAATTAGGTGCTACTCAGTAAATGGAAGTGAAGATTAATTTTGAGTGAAGAAGGCTTATAGAAAGAAGTTATCCAATCAAGGTATGAGGGATGAAGGAAATTATATGAGTTGAGAAATAGAAGGATCCCACAAAAGGTTTCTCGCTAGTGGGCAAACTTGGCCAAGGTCTATGAGGCTGGTTTTTAGCAACAATGCTTCAATTTGAATATAAGGTGGAGGGTGGGGGATGGTAAAAAGTTGTTGTTCTGGTCAGATTCATGGAATGGAACTAAAGCCTTGGAAATTAAATACCTAAGACTGTTCTTGAATGCAAACAATCAATCTGCAACTATTGCTGATATGGGTGATTGGGTGGAAGGGCATTGGGAGTAGAAGTGGGAGTGAAAGAGGAATTGGTTTGAGTGGTAGAAAGACCTTTTGTCTGACTTACTCTCTTATATACAATTTGTTCAACCAAATCAATTTTAGGAGGATTATTTACTTGGGAGAGCGAACCCTTTAATGTATTCTCTGTGTCTTCCGCTTACCTTTCTTTATGTGCGGTTTGGAATTTGAGAATGAGGAGTTTTATAAAAAAATCTGGAGAACAAAAGCAACACCCTCAACACTTTTGTTGGCATGGAGAGTAGTAACAACAAGGGCACCAACTAAAACTAATCTTAGGAGGAGGTAATTGTACTACAAGACACAAATTGCATGTTCTTCAATGTTTATGAAGAGGATGAAGAACACCTAGTTCTGAGATGCAATTTTGTTTATCAATTATGGTGCATGTGCTTTAATTGGCTCTGTATTCAAATAGCTACACCAAAGAAACCTATAGAGGCATTTCTCCAATTCTACATGGTCACTAAATCTCAACTTTGGAATGACTATTTTTCTGTTGTTTGGTACTCATCTCTAGCTTCAATTTGGAAAAGTAGAAATAGACTAGTCTTTAGGGATAAACAACTTGATTTGTATCTCCCATGGGAGGGTAAAGGACAAATCATGGACTAAAGGGAGGAAGACATGAATGTTCACATCAAGAATAGGAAACTAACCTATTATTATGCATTGATACATGGTGCATTTGACTTGTGTTTGAGTGACATAATTGGTTTGATTGAAGGGAGGTCACTGTATACATTGCAGGTCTTTTTTTGGATGTTAGCTTTTGTGATGGGGTACATTATTAATGTTTTTGGCTCTTGTTACGAGGGTGTGTTATTGTTTATTCAGGTAGTTTCTTCTCCTTAATAGTTAGTAACATTTTCTTCTTTGCAGTCTATTATGTAGAACTCTTAGGCTTAGTAGTGTTGGTACCTCTGGTATATGTATTTTTCTCTTTTGGCCATATAATAGTATATATTTGCTGACTCAAAAAAAAAAAAAAAACACCAACACATTTATCTCAATCTTATTTTTTATGAAGACTTCAAAATTAATAAAATTGTTCATTATAAAAATACTGATAATATAAAATAAAGATTTTATTTGTATTAAATATTTTGTATATATATTATATGAATCTATTTTTAGATCTAAATAATCTTGTAAAAAATATTATAATTTTATTTCAATATTTTTCAACAAATAAAGAATTTATTGAATAAAACTTATTATAAAAAAAACTTTTTAAAAATATTTGTGGGTACTCGTGGATATCCACAAGTATTAAAAAAAATCTATGGATATGTTTTATAAAGGGTACCCAACAAGTCTTTAGTGATGAAAGAGAAACAAACTTTTTGCAACGGGTTGGGTAGTAGATTACTACTATTCGTACCCACCTTAACCCATTACTATTTCTTGGAATGGGTATTCACAAAAACTGCTCTCACGCGATGTGTGTAATTACTTGCATAATTGGTTTAGGCATAAGACGAATCTGGATCCATAAAAATTATGTGATTATGGGAGCGAGTATGGTACCATAGTACCTGTTTTGCCCTACACCTTATACATATATGATATTATTTAATATAATTATATTATATAATACTACAATTGAATAATATAATTATACAATAAAAAGAGATATTTAATATATTTTACAAAAAATTAATAAACTAAAAATACAATTTACAAAAAAAATTAGTTATTTATAAAATAATTCTTAATAAAATTATAATATTATTTAATGTATGATAAAAAAAAAGGTTTATGCTTAATGATATAAAACTTTAGGAAGTATTTTATCATTTATTCAATGTTTAATGTTATGGTTACTTGTTTTTTATATTACATGTTTACTTATGTTTGAATGATATTATTAATGTTTAATATTATTATTTCTATATATAAGTAAAGTATAGGTTGCTGGTGTGAGTATGAGTACAATTTAATATATTTTACAAAAAAGAGATATTTAATATATTTTACAAAAAATTAATAAACTAAAAATACAATTTACAAAAAAAATTAGTTATTTATAAAATAATTCTTAATAAAATTATAATATTATTTAATGTATGATAAAAAAAAAGGTTTATGCTTAATGATATAAAACTTTAGGAAGTATTTTATCATTTATTCAATGTTTAATGTTATGGTTACTTATTTTTTATATTACATGTTTACTTATGTTTGAATGATATTATTAATGTTTAATATTATTATTTCTATATATAAGTAAAGTATAGGTTGCTGGTGTGAGTATGAGTACATAAGTACCTAATGAATACGAGAATGAGTATATATGCTTATCATAAAATAATTTTTACATTAGCTTATTTTGAGAAGCTATTATAATTAGTTTGTAAAAATAATTTTTTTTCCTATTTTTTAGTTTAACCAAACATCTAAGGTTATAATAAGTGTTTATTCTATTTAAATAAGTGATTTCTTGTCATAAAAACTTAAAAAAATTACCTAATATATTTGTTATATTTTATTTTATATATTTTTTTAAAAAAGTGAAATATATAATTATATAATTTTATTTCAAATTCATGTATAGCTTTTATCAAACTTAGCTAAACTAAGTTTTTATTTTAACAAGGCTTAAATGCAATTTTGGTCTCTCAATTTTTCAAAATTAGAAATTTTGATTCCTCTATTTTAAAATAAAAACATTTAGTTATCTAATTTTTTCAAAATTCATTATTTTGGTCAATGAATAAAAATTAGAAGTATTTACCATTATAAAATTAACTCAAATTTGGTGATGTAATATGATATTATTTGTTTAATCAAAGTCACAATCAATGTTAATTTGATAATAGTCAACTGTTTTAGTTTAATGAAAGAATTAAAATTACAGATTTTACAAAATTAGGAGACTAAATTGTAGATATTACAAAATTAAAGGATTAAATATCTTTATTTTAAAAAAGAAAGACCGAAATTGAAGATTTTAAAAAATAAAAAAAAACCAAAATTACATTTAAGCCTAATTAATGAAAATGAATAAAAAAATTTACTCCCAAACATACAAAAAATATTTTCATTTAAAATATGCTACTTAAATGATGTAAATTTTACATGAAATTCGTTTGAAATATACAAATAAAATAATACAATTTGCTTTGAGTAGCAAGAAAATATACTAAAATAAATAAACATATGAGTCTACTCCTCGGTCATTTCCTAATGAATGAACAATTTTTCTTTTCACTCCTCCCGTTTTACTATTTGCACCAACTATTAATTCAAAATACTCAATGTGCCATCCTCTCCCTCAATGCCTCCACCACAAGCCGCCACCCCCACAACTGCTTGCCACCCTCTGAGCCCCCTCCCTTCTCCCCACCCATAGCCTCGCGCCCCTTAGACCCCTTCTCCTACCCCTTGTAGCTCCTCTCCCTGCCTTCCAAAAATTCTAAGCAGACAAAACAAAATACAAATGTTGATCGTTACACATCTTATTTAGTGTTTATCTCTCTTAAAGTTGTAGTAGTTTTAAATAGATTCTAGCTAATGGTAATATGTTAGAAAAAAATGTTAAATTATTATCGATATCCCCTTATTTTGGCGCTTTGGTACTTTTTACCTTCTGTCAAATTAAGAAGTTGATTGTTAGAAGACAACGTTGACTTTCGTGATTAATAATGTGACATTGTTAATTTTATAATTAAGAATTAATTAAAGTGTAATTAATGCAATGTTAATTTTAAAAATATACAAAAGTAGGTCATGACTAGGGATGACAAAAAAATTCACGCCCGTGGATACCCATTGATAAAACCCGCAAAAATATTCTCGCGAATAATATAAATGAGTACTTGCTACCCGCATGTATGGGTTTTTTCTACCCATTCCTTAACGGACACAGGTAGAAATGGCAACGGGTCGGGGCGGGCACGGGTAGTGGTTACCCGCCACTTGACCCGCTACAAAAACCTGTCACCCGTTACCTACTAAAAACCATTGGGTACCTGCTATAGAAATAGTCGCCAGGTTTTTTTAATACCAACAGGTATCCATGGACATTTTTTATTTTTTTAAATTAAATATTTTTTATAAAAATTTTTATCCAATAAATCATTTATTTGTTGGAAAATTTAAAAATAAAATTATACTAATTTCTACAAGATTAATTAGATTTAAAATTATATTAATATAATATATTATAAGAAAATATTTAATTCAAATAAAATCTTTATTTTATATTATCAACATTTTTATAATAAATAATTTTATTAAATATGAAGTTTTCATAAAAAAATAAGATTGATATCAATGAATTTTGATAATTAATATTTTAATTTGATTTATTTTCTAAAAAAATTATTTTTTTTAACTTTTATATATATATATATATATTATTTTAGTTTAGCGGGTACCCGCGAGTATGGATACTATAATACTCGTACCCGTGCCCATCCGTTAAGGACCGCGTAGAAAAAAACTCATATCTGCGGGTGGCGATACCTATTTATACTATCCATGCAGATATTTTTGTGCGTTTTATCTACAGATATCCGCAGGCACAAATTTTTTTGCCATCCTTAGGCACGGGTATGGGTATCATAATACTCGTACCTGCGGGTACCCACTAAACTAACATAATACATATATACATATATACATATATATATATATATATATATATATATATATATAAGTTAAATTTTTAACTTATATATATATATATATATATGTATATATAAGTTAAAAAATTTAATATTTTTTAGAAAATAAATCAAATTAAAATATTAATTATCAAAATTCATTGACATCAATCTTATTTTTTATGAAAACGCCATAGTTAATAAAATTATTTATTATAAAAAAACTGATAATATAAAATAAAGATTTTATTTGTATAAAATTATTTTTCAAAAATACCCATGGGTGCCCATAGATACCATTAGTATTTAAAAAAATCCACAGGTATTGTTGTCATTCCTAGCCATGACAAGGTTTGAATCCAAAACCTAACATGTATAAACCAAGAGTCTTACCACTACACCAAATGCTTTCATTTCTCTTTGTTTTGAAATTCAAATTTAGTTAAACTATAATTACTGTTAGTTTCAAAAATACAAAAAACACAGATAAAAAATACACAAGTTGCACAACCCGAGAATCAAACTTAAGACTGCAAAGTTCCAAGCAAGAAATTATACAACTAAAGCAAATGCTCACTTTGATTTTAATTTTAACTTTCAGCTTATTTTGTTTTTATTTTCTAGTCTATTTTTGTTGTAAATTAAAAAGTGAATGAAGAGACATGATGGTGTGTGAGATTATATGCTTGAATTTTTTAAATGGAGACATTTTTTAAATTCTAAAAAAAAAGTAAAAAATAAAAAATAAAAATTAAAAACTAAAATGAAAATCTAAAATTTAAAATTTAAAATATAAATTTAAAATCAAAACTAAAAGTTAAAATTATAAATTTAATTTTTTTAATTATATAAAAGTTAAAACTTATATTTTTAAAATCAAAATTAAAAGTTAAAACTTATATTTTTAACTTTATTTAATTCTTTATTGAAATTAAAAAATATGAATAAATATATAAATTAAATTTATAATTTATAATTTTAAATTTTAGTTTTAATTTTAATTTTATATTATATATATATTTTTAATTTTTAAATTATTTATTTTAGTTTTAATTTTTAGTTTTTTATTTTTTATTTTTATTTTTTAAAATTTTAAAAATGTCTCCATTTAAAAAATTCAAGCATATCATCCCACACACCACCATGTCTCTTCATTCACTTTTTAATTTACAACAAAAATAGACCAGAAAATAAAAACAAAATAAGCCGAAAGGTAAAAATAAAAGTGAAGTGAGCATTTAGAGATTGATTGGTTTAGTTTTTTTTTTTAGTTTTTGAAAAGAGTTTTCAAGAATAGTTTTTAAAAACTGTTTTCGGAAAGAAAAGAAAAGAAAACTTGTTTGATAAGTGTTATTTAAAAACTATTTTGAAGATGTAAAAATAGAAAAACTTGTTCATATTTATTAAAATTTAATTAATGAAAAATAAAAAATAACATATTCTGATTGTATTTTGAGTTTTCAAAACAAAAATAAAAAAATGAAAAACAAGATTACTTTTAGTTGTTGTTGTTTTTTAGCTTTTAAAAACTAAAAAACCAGAACTGTTTTCAGAAAACATTACCCAAACGAGTTTTTTTGTTTTTAAATACTAAAATATTAAACTTTTTTTATAAAACTGTTACCAAACAAACACTTAGTCTAATGATATGATTTTCTGCCTAGAACTTTGTAGTATTGAGTTTGATTCTCAAGGTTTGCAACAGGTGTTTTATATTTTTGTTTGTATTTTTTAAACTAACATTAATTATGGTTTAATTATATTTGAATTTCAAATGAAAACAAATAAAAGCATTTGGTGTAGTGGTAAGAATCTTGGTCTATGCATGTGAGGTCTTGGGATTTGGTGTCATGTCATACCACTAAATTCTTAATTACAAAATTAACAATGTTACGTCATTAATCACAAAAGTGTATTGGTAGAAAAAAAATGTAATAAAGTGTATTGCTAGTATTTTTCCTCTTATATACATGAGAAGAGATTCACTTACTCTAAGAGTGAATATAAGAGTACTCTTTATCTCCATAATTTTATTTTCTTAAAATTTAAATGTTGTAATAAGTAACTAATATAAACTATCAGATTTAAAAAAAAAATGAATAATGAAGATAAAAAGTATTTTATATTTACTCTTAGAGTAAGTAGATTCCTTTTGTGCGTGCATGAAGAAAAAATATAACAAAAACATGTGAAACTATATTTTCAATTGTCATATATAAGTGCAATTAGATTTTTTTATAGACAAATATTAGTTTTTAGTGTGTTACTTCTGTTAGCGGAGAAATTCAAACACACGACCTTTGCCTACTCTATCTTTTTATATATGGACTTTGTCACCAGACTGACCTTACTACTGCTAATGCAATTAGATTGTTATTGAAGCTTGAATAAAATATTCGCAAACATAAACTCATGGACATTAAAATAGAAAAACCATTCGGTTAGGTTGAGTTATCTTTCAATATATCTTTTCAAACTCACTAATAATTTCTTTTTTATAAATCAATGTTAGTTGTTAATGATTTAATATGTTAGTTTTAAGTTGTTAGTGGAGGAATTTAAATTCATCATCTTCCCTCTCCCTACATGTGTGGACTTTACCTTTAGACAATTTTATAACCTTTACCTCTAATCATTTTATATTTGAGTTAGGTTAAGTTGGTATATGTGTCACATAACCGTTGATATCTTAAGGTTAAAAAAGTGGTATTTATTATATGTATATAGTTAAAAATTTCAACAACGAATACATTTTAACTACTTATACTCTTAAAATACTTTGTAGGGAAAATCCATTTTCAAATTACAAATTATACATCTTCTATATAATTACAATCTAGTAAGCCATGATTTATTTATTTTTATAACTGGGAGGTATTTGTATATTTTATTTTGACACTTATATTATTTTTCTAACAACTCTACTCATTTGAACTAGGAAAAATTATTAGTATATAGTTTCAGATGTAACATTATCTATAACAATTTATTATTTATTATTTGATTAGATTATAAATATTTTTTTTTAAAATTTGATTAAATTAATTGTGAATTATATGTTATATAATTATTACATATGGATGGTGTAATGATCCGAAATTATAGAATATTTATCATAAAGTAGAATGATATTTTCACTTAATCTCCATTCTAAATTAAAGATGGAACCTACATATATTTAGTTAATAGACGTAAGAGACAAACCATTGTGCCAGCAGTTTTGGGTATCAAATTTATTTTACTGCCTATAGGTCTTGACACTACAAGTAGGTCAAAAGTAACTTTCTATGTCATATTACGAGGGTTTGTTGTCGAGCAGGTCGATCGTAGATTTTTTCTGGGAAACACCTATTATAATTATTCAATTTACTTCACAATTTGGACATGCTAAAGAATAACTTGATCTGTTTCTACCTTTTAAGCCTGTTTTCTGCCAAATCACGTGGCACGACTGAAGTTCCTTAACAAACATGTATAAGAATGTAGTCCTAGAGGAATCATGTTAAAAATTGTAGGTTGTTTCTAAAAAATATCTTTAGAATAGTGATTAAGAGGTCAAACGTAAAAAGGAAATAAATTGTTAACGTATTTTGTGATGATTTAATGTAACTTTATCGTAAATTTCAACAAAAACTATCTATATCAATGACAAAAATAAATGAATGTTTGAAAATATGATAATATATAATGTATGGATTATTAATAACCATTTTTTTTTTATAAAAAATCACGATAAGATGTTTATTTAAATTAAAAAAATAGTATTTATCCATTTATAATACCAAGGTAACATTTATTAACCATGTTTTTACGGTAGCAAGAGGGGATGGCACCGGCAACAATCTTAATTTAATATAAATAATACTTTTATTTTTTAAAATATTGAAGAAAAAGTGATAAAGCCATGTGTTTTACCGTCCTTGATTCCTTTCTTGGTGGTCAAACTTACAGTATGAAATTGCACCATTCGAGATCAATCTTTATTTGTCATCACCCCAAACTTCTGCTATAAACTATTCTTGTGTTATCACTCATATATATTGTCTCTTTCTTCTCCTTCCACATTTTAACCTTGTCAACACACTATTACTTCCTAGTGTTATTCGCTCAATATTATATATATATATATACAATTTCAACTTGAAAACAAGCAAAATAGTAATTAATTTATCTATACTACTTTTTGCTAATTCTGGCGCGGATAATTATGACTCATAAGTGGTAAGTATAATATATTCAACATTTTCATACTTAAACATCAATGTTCCGTGTGTACATAATAATATAGGACAGTGTATATGTGAAATTCCACATTGGAAGCTTGGGAGTTAGATTTCCCTACAATTTGTCTCCTCACAAACTTTTGAGAATGAAATATGTAACCCGCAAGACAAGGGTTGTTGTCCTGGCACAGGGGCACAAGGTGCAACAATAATTTTGCTAGCTAATATTGTTTTGGCCCAATTAATTTATGTTAGTATAGTGGTATATAAAAAAATAAAAAACTATTAGTGGTAGCTTATACATAGTATCCTAATACTAGTAAGTGAACTAGGTGAGGCTCGCTTATCTTGAACATGAGTTATAAATAGAAAAAGGAAAAAAGGGTTGTCTGTCATGCATGAATTATTGTTTGTGGCTTTGTTGAGAGAAGAGAGAGTATCTTACTCACTGAGAGAAAAGTACCAAAAGAGAGAGACAGTTCCGTTTGTAGCGGGGGAGCAGATTGATGATTAGGACGAGGAGATAATAGTTAAATAATGTGCCATATGGGCATGGACGGAATGTGAGTGAAAAAGTTATGGGATATATGGCTGTTTCCTCGTCGCATATATATCATGAGAGAGATAATTCACATATCATTTTTTAAAACCAAGAATTTTTTTATGTAATATTGTTCGTCTAAATATTTTTATAGGTCATCAATAAATTCAAATTATTATTAATATAATATAATTTTTAGATAAATTTATTACTTTATTATATATAAATTAAAAATTTATGATAATACGTATAAGATTGTTTTACATAGAGATTGATATATGGCCAAATTGAAAAGTAAGTTAAGGTTCTGACTTGTGATGGTCATAATAGGTCTGACATGAAGTGACTAATGTCCAAGTGCGCTTCAATAAATGGGTGTGGCGAGGGGCTGAGTGTGGTTTTTTCTCACGCTAATTTGTCAGAAATTATTATTTCAACCTCCCCAACAGGTGTTTACAGCGAAGAAAGAGAAAAATGGATAGATGCACCTTGGAACTATTCTCGACTTTGTTCCATCATCCTGATCAATGTGCAATTAGCACAAGCTGAGATATATCATTCAGCTTTTGGTTTATCATTCTTCATTCCATCTGTTAGTGATTATTGGTAAGCACAACATTTTCTATCTAAATTCACCAATACTAAACTGTTCTTCCAAAAAAATGTACTAGAGTATTGTTTACGACAATTTTTTTAAAATGTCTTTCATTCTTTTAGAAGGAGGAAGAATCTAAAAAAAGAATTCTAACGATTAACAAATAAGTGAGATGGAAAAAGTAAGAGGAATAAATTCTTTGAAATAATGTATGATTTATACCCATATTTACACTAAATATGTGTTTTTTACAGTGTAGTTATTATTTTTGTTTATTTTGTTTAAACTTATTCAGAGTATTATTAATTTGTAAACATACTAATTAGTCTTTTAATTTGGTTAATTAACTTATTATAGGAATTCAAATTCTTTGTATTATTAATGTTGTTTCTTATTTTAAAAGATATCATTCTATATTTCAATTTTTGGTCATGTCAAAATTCAAGTTCTCTTATATTTATTTTTTTTTTCTTTTAATTTCAATTGCTAATCCAAAATCCTTTTAATCCAAAAATCTTAATGTGTTCTTTTATATTTTATTTTATTTTTTAATTTTTTACTCAAAATATAAAGTCTTTTTTATCACCTTCTTTTAAGAATATTTAGATCCTTTTGCCTACTTTCTGTTATTATAATTATACACAAACAATCATCAATCCTTTTGCCTAAACATTTCAAACCTAGTAGCTAGCTAACATGTTTTAGTGGGTCCGGTTCTGCCTAAAACACCCATGAAATAACACTGCTACACAAGATGGATAAATTAATTTATTGCTGCGCACGTGACTTTCATTTTATTTTTCTTATACATACTATATAGTGAACCTCGATATACAATGTTTCCATTTTTAATAGACATGTAAATATAACTCTTTCATACGGTAGATTTCATACATAATAATTAGAACAGTATCCGTACAAAAATGTAATTTTAAAAATACATATTAAATTATGCACAAGACTGTCATTCATGTCCACACGTGTTTATGCATATGAATAACTAGTAGCTTAATCTATGATATAAATAATATTTAGAACACTGCAAAATCTAATCATAAAAAATAGGGCATGTGTGCACCTACCCTGAAAACGTCAATTTAACTTAATCAGTAAATTTATTTTAAATATATACGAACTCATTACCTGTTAATATAATTAATAAATTAAAAATAAATGTTTTTGTTAATTACCAAATATAATATTTAACATTATTAATACACTGTCAGTATACTCTTAATAAAATAAATTTGCTTATCGATTTTTGAATTTTTTTAATTGAGAATCGACATAAAATTTTTTTATCTTTGATATTAAAGACGTAGTTTAATAGCTATATGTGAATAAAATTGTTACATGTCATTTCATTGACACCTAACCCAATAGATTAACAGTGTCTGTACATTTTATTGCTTAATTTTATCCATGAAAAAAAAAAGGTTTAACAAAAGAAAAACCAAAGTTACAGCAATATCTAACTTTACACTTTAGAATAAAAGTAAGGAATATATCACATATCGCATCAGATTTTTTTTTTTCATGAAACATGAAGGAAGAGAAAGACATTTAGTGTAGCGTCACAAGTCACAACTGTTGAGAATGAATGGAAACATCACATCGTATCAGATGAAGGCATTATTTTTCAGTGCCGCGAGCAACTAGTAGTGTGCTCGGAGTACCGCATTAATTACGAAAGGGTCCCCATGGATTTGAACCAATTTTCTGATTCAAAGATTTCAATTGCCCTGTAATGTATAAGACGCGTCCCATGTCTATTGTGTGTACGTGCATATCACCCAGAAGAAAGAGAAAATAATATTCAGAGTATATAAATATACTATAAATGTTCTCTCATCTCTATGCTATAAATGTTTTTTTTTTCCAATTTTTGAGCTCTTCAAGAATTTGACCCTTCTTCTCCTCTTCCTTTTTTCTTTCTGCCTTTCTCATATAAATTTCTTCATGCACAAACTGATATTTTCACCCCTTATAAATATGTACTTCTGAAGATTATCTTGGGGGCTTAGTGATCTCTCTGTGATATTCAGTCAGTATCACTTATGGGGTCTATGAATTTGTTGGGGTTTTCTCTCTCCCCTCAAGAACACCCTTCTAGTCAAGATCACTCTCAAACGGCACCTTCTCGTTTTGCTTTCAATCCTGATGGAATCTCAAGCACTGATGTACCAGGAAACTGTTTTGATCTTACTTCTGACTCAACTCCTCATTTACTCAACCTTCCTTCATATGGCATATATGAAGCGTTTCATAGGAACAATAATATTCAAACCACTCAAGGTTTTTACTTCTTCCCCGTCACGTATTTATAACATATGTTATTTTTCTTAGATTTTCCTCAACAAGTGCACCCCATCACCACTATTCACAAACTAAATGAAGAAAACCCAAGAAAATCAAATATTTTCAGGCCTCTTCTTCTTTTTTTACCTTTATTCTACTAAGGATTTACTTTCGGGTAGCACTATTGAAAAAAATATGATATATGGTCCTTCATTTCTCAGATTGGAAGGAGAACTACAACAACCAAAACTTGCTATTGGGAACTTCATGCAGTAACCAAAACATGAACCACAACCAACAGCAGCAACAACAACCAAAGCTTGAAAACTTCCTGGGTGGACACTCTTTTGGAGAACATGAGCAAACATACGGTGGTAACTCAGCCTCAACAGATTACATGTTTCCGGCTCAGCCGGTAGCAGCCGGAGGCAGTAGCGGTGGTGGTGGTAGCAGCAGCACGAGTAACAGTAACTCCATAGGGTTGTCCATGATAAAGACATGGTTGAGGAACCAACCACCACCCTCAGAAAACAACAACAGCAACAATGAAAGTGGTATCAATAATAGAAGCAGTACTGTTCAGACTCTATCTCTTTCTATGAGTACTGGTTCACAATCAAGCTCTTCGCTGCCCCTTCTAACTGCTAGTGTGGATAATGGAGAGAGCTCTTCAGATAACAAACAACCACTCGCCACATCAGCACTTGATACATCCCAAACTGGAGCCATTGAAACCGCACCCAGAAAATCCATTGACACGTTTGGACAGAGAACTTCTATATACCGTGGTGTAACAAGGTTTTTTATTTACACCTAAGCAATGATATATACGAATATTTACCATTTCTTTTAGGTATAAATGTGAACCGTCACAAATCTTTCATCGCTGCTTCATATCTCGGTTAAAAGGTTTCTTTAGTCAGTTTTATTGTTATTCTAACAAGATTTTTTTTTTTTTTTTTTTTGAGATGATGATGAACTTAGGTTTTCCTTCTTCTTCTGTTTTTAAATTAATTGAAGGCATAGGTGGACGGGCAGATATGAGGCTCATCTTTGGGATAATAGTTGTAGGAGAGAGGGACAAACTCGAAAGGGAAGGCAAGGTATGATCTACCACACATATTCCTCTAATTTTGTTATTATTTTTGCCAATGGTTTTTTCTTCCTCTAATATGTTGCGGAGTATAACATTAACCTGTGTTCTTCATCTATCTTCGCTCGATTTTGGGTTATGGCTTTCTTCAACATATATACATGGTCTTGCAGTTTACTTGGGTGAGTACAAAAAGATGCACATTCTTTTAATTATAGTTGCATTGTTTTTATTTTATTTTTCTCCACATAAAGTATGAAGCGAACGATAAAATTGTTTAAATTGGTTATAATTTGTTGTCACTACTTGCAGGAGGTTATGACAAAGAAGAAAAGGCAGCTAGAGCCTACGATTTGGCAGCACTAAAATACTGGGGAACAACTACAACAACAAATTTTCCTGTAAGTTAATGACCACTTTTTTTCTGTTTATGCTCAATAAATTAAGGGTCGTGTTGCACGTATAGCCATAGGAAAAGTTTTGCATCTACAAAAAAACCAACAATGGTGAATGGGGAAGCGTCAACCGGTACAATCTACTACGAGAGGGCACATTGTACAATTGTGTCCTTTTACAATGAAAAAGTTTCCTCATTTGATGGGATGTGTCTCTTCATAGAAGAAACTGTTATTTGTCTTATAATGCAAACTATGAATGTATACATGATAACTTGATTTAGCCTTTGACATCGAATACTTTATGTCTCCATCAACAATCAATGCATTTTAGATTAGCCACTATGAGAAAGAGTTTGAAGAAATGAAGCACATGACTAGGCAGGAGTATGTTGCGTCACTGAGAAGGTATTTGCAAGTGATACTAGTAATCTAAAATATTACTTTTTTAATAGATTATTTATTGATAATATAAAATCACGTTGTCACAGGAAGAGTAGTGGGTTTTCTCGCGGTGCATCCATTTATCGAGGAGTAACGAGGTACAGTTGACTAGACACTAATATGTCTCTATACAATAGTCTATCGTCTATGTGAATACCATGTTATATATCAAATTAATGATTCATGAATGCGATTGAAAAGACCTTAATTTTTAGAAGAATGGGTTCTTAAAATTGTTTGACATTAATATTTTTAGAAGACTCTATCTCACATTTAATTTTTGTTTCTTTGATCGTAAATAAAAATTTAGAAAATAAAAAATTGAAATTTGTATGCAAACATGAAAAAAACAACAACTAATTTTCACTATATTGCTTGATTGTTGAAATATTTATTTGATGGACGTGAAGGGCGATGTTTAATCTGATTTAAAAATAATATCATACATACTAACTAGTTTTTTGTTATTCTAATTAGTTGATTGTTTGATCTGATTTAAAATAATATCATATATACTAACTAGTTTTTTGTTATTCTAATTATTTGATTGTAGACACCATCAACATGGTAGATGGCAAGCGAGGATTGGAAGAGTTGCGGGAAACAAAGATCTCTACTTGGGAACTTTCAGTAAGCTAATATTTATTTCAGTAATACCTCACATCTTAGGCCACACTTTAATTGGAATGGATATATAATTTTCTTAACAATCCAAACACGAGTTTATTTTAAACAGTTTTATCCATAAATATATTTATATTTATTAATAGCAGAAAAGAACTTAAACAGATCAGTCGAATGTTTACTTCATAAGAAAATTAAATGTTTCTTCTCTAATTTAACCTTAATGATCTATATATAACCCAGAAGTAATTAATTAATTTCAATGATGTTCACCATATAGTAAGACTAATTCATATATATTATGTGTGTATGTATGTAAGTATACCCCTTATGTTACTAACAATTAAATTTCAGGCACCCAAGAAGAGGCTGCAGAAGCATATGATGTTGCAGCCATAAAATTCCGAGGGCTAAGTGCTGTGACAAACTTTGACATGAGCAAATATGACGTTAAGAGCATACTTGAGAGCCCGACTTTGCCAATTGGTGGTGCTGCAAAGCGTTTGAAGGACATGGAGCAGGTGGAACTGAGTATCGAAGGCCATAGAGCAGATCAAGAAGATCATAGTAGCATCATAAGCTCTCATCTAACTCAAGGAGTGAATAATAACTATGCAGGAGGCACAACTCATCATAACTGGCATAATGCTCTTGCATTCCACCAACCTCAACCTTGCACCACCATATATCATCCTTATGGACAAAGAATGTGGTGCAAGCAAGAACAACAAGATAATTCTGATGCCTCTCACCCTTTGTCATCTTATCCTGATATTCATCAACTTCAGCTAGGGAATAATGGGACACACAATTTCTTTCATTCAAATTCCGGGTTGCACCCTATCATGAGCATGGATTCTGCTTCCATTGACAATAGCTCTTCATCTAACTCAGTTGTTTATGATGGCTATGGAGGTGGAGGCTACGTGATGCCTATGGGGACTACTGCTGTTGTTCCGAGTGATGGTGATCAAAATCAAAGAGGCAATAATGGTTTTGGTGATAATGCGATAAAGGCTCTTGGTTATGATACTGTTTATGGTTCTACTGATCCCTATCATGCACACTCAAGGAACTTGTACTATCTTTCTCAACAGCAATCATCTTCTGTGGATGCAGTCAAGGCTAGTGCATATGATCAAGGATCTACATGCAATACTTGGGTTCCAACTGCTATTCCAACTCTTGCACCAAGGTCTACCAGTATGGCTCTCTGCCACGGTGCTACACCTTTCTCGTTATTGCATGAATAGGTGGACAACTAAGGAGAAGGAAGATTCACCAAAGTGATGAAAATGATGAAGATATATTGCTGACTTGCTTCTTCCTCTTATGAAGTCTCTAATATATATAGTGTGCTCTTTTGAAGATAAGGATATATATAGGTTTTCTTTCATCATCTCTAACTTGCAGATCCTTATTTCACTAGGGTCTAAGTAATCTAGCCTCAAGTTGAGTCACGGCAGAACCATTTGCTGTGAATTTTGGGAATTAACTTCGACAATGTGTGGACAGATCATTGGCATGTCTTTAATTATTATCACCCGGGTTTTGTAATTCTGGAAGGATCATACAAAGATGGAATTTTCCTCAATGTATATGCATGGCACTTTTTTTAGTTTCTTGACCAAATTCTTTATACACATTATGCATGGTAAAGGGTATTAGTGATTTTCTGACTCATCTTCGATCACAGTTTTGTTTACGTTTACAGACATTCGATCAGTGTGATTCGATGATACGCTTGAATAGATTAGACACAATTATTTTCAAATAAAAAAGATTTCTTATATATTAGATTAATTATATCGTATATACGTTACCGCTATATATATTTATGTTACTTGAGATGTATATGTTCTTGTTTAATTTATTATTTGGAAAGAGGAGTGTCAAAATGATGCAATGAAAATAAAGTGTAAATAACATTGAATATTTTATACTTACACTATCAAACAATAACAGTATCCATTTTCTGTATTTTTATTCCAATAAGTGTAAATATATTTATACTAAAATTGAATTGAAGTGAACAAAAAATGGGACGATAAATTTTTAATGAATAGAAATAATGATGTGAAATAATTGAATTTATAAGTAGCTAAAAGAATTAATATAGGAAGAAAATGGGCAGAGGGTGAATGAAAGCATATAGAAAGAAAGGTGAATGTCGAAAAACAATGCTGAGGTAGGTAGGTAGGGAGGGAGAGGGAGGGTTTGTCTAGTGATTAAATGAGTAAGCAACAAAGTGAATATTTCTTTTATATATATTCCCCCGCTTTTCACTCTCTTGTTTGTTTCTGATTAGCGTACTAGCTAGCTGGTTATGGTTATGGTTATGATGAATATCATCGGAGAAATCAGCGGAGTACCCGTGCCTCCTCGGAAAGGATACCAAATATTTTATCATCTCTGAGAGCATCTGCACTTGGTTGCAGCATTGTTTTGTTTTGTTTTCACCCTTATCCATGCACTAACACTGCCCCTTCTTCAAAGAGATTTCCGAGAAAAGTGAACTTTGTTTAAAGTCTTGTACCATCTAGTGGGTCGCAACTCGCAACTCGCAACTCGCAATTCTCCCCTTTACACTTTTTCTTCCCATGCTTTTTCGTCTCATCCCTCCCTGTCCCTATCCTTCTCCCTGTTTATTACACTAATTTTCATCATTTCTAATTCTATTCAAAACTTTTAAACAATATATCAATTTTTTTCTACTTCATCATTTTCTTTTCATTTCGAATTTTATTAAACAAAATGTTTTCTGCTCATAACACCTCGGAAAAAATATCCCATGACCTCTTAAAAATTAAAGTTAATACATTTCATTATTATTTCACAAAAATATGTCACATTAATGCTTTCAAACTTTAAAAAATATATTTTTTAATTAAAAACATGATTTATTTTTAAAGAGTAGAAATCAAATCTTAAAAACACATTTTTTATTATTTTAATACATTTCAATTTTTTCATTAATTATATTTACAGACATTCATTAGCTATGCCCATGCAAAAATTATTCATATATATATATATATATATATATGTATTAATTAATTAAGATCCATTTATTCTACATAAAGTTTTGTATATATCATTAACAGTCATGAACTCACCCTAACAAGTTTTATAACCCTTATGACTCAATCCTTATAGGTTTTGACCCCACTGCATGGCTTTAGTGGGTGAATGATGGAACCACGAAATTAGGGGCCCAGAGGTTCCCATTTAACCTCTGGAGGGCTTGAATGCCACTATTTTTTAAGGTATATTTTCATACTTTTGGGGTATGGGGATAATTTGTTGGACTTGAAACAGTATAGTTAGTGACATCTTTAGCTTGAACTTTTGTCTTTTACTAAAAAGTAAGTAAAATAATATTTGTAACTCATTTTTCTATTATCTTCATTAATGTACTTTCTATAATTATTTGATAAGTTATAAATGAATTCATCTCATTGAATAAAGTGTAAATTTGTGTTATTTAAAGAGTAAATTAAAAACAAAAGTGTGATACTATAACATTCTTCATTCCAAAGAAATTATGTAATTGAGAAATGTTTGAATACACTATTTTGACACTTTTAAGTTTTAATACACTAATCATATTCTAGAATGAATTACATATAGCAATCGTATTAAAAGAGATATAAGATTTACATAATTAATTATTAAACTATACTTATTAAAAATTACTTCATAAAAAAAATGTTGAAAAAAATCAATCCTTATATCCAGATCCTCTTACTTATCAATATGTCTAACTAGTTATAACCTTAATGGTCAAAACTTGAAGGTCTCAGTTTTGTGTTCATTTGTTGTTTTTTAGTAATTTAAGAAAGTACTGAAAGACTTCTTTAATTATGTGAATATATTTTTTTTGCTTGACATATTCTATTAATTTTACAATCAAGAAAATAATTAAACAAAATCCTTCTATATAATTGAGTATGAATATATCAAGTGTTTAATTAAGTTGTTTATTAAATTAAAAAGCTTTTTCATGTTGGAAGTGAAGAAGGGATTATGTCCAATATTATAAAATTGCATGCCTCATGCATGTGCGTCTGTGTCTAAGTTCTCAAATAGAATCCTATCGTAACCTAACAAGCTCTAGGAATGCTCATTCATGTCTTCTTCTTCGGGCTTTATATTAATTTATCAAATCCAATGCCCTAGCTTTGTGGTTGTGGAAACTCTGTTTGGGATTTAAACTTTTTTGACTTTGACTATAGCTAGGCTTCCATGTACTATTAACATTCTTTAAACAATAACAAATTATTAGGCATATAGAGAGAGAGAGGTATCTCTATATTTTAATCAAATTATTTTAATATTACGAATAGTTAAAAAAATTCTATCACTGAATTCAAATTTACTTTATAGTTAATTAATCATTGTCTATGATTAATAATTAAAGACTTTATTTAATTTTTATTAATCTAATTCTCTTATTCTTATATACCTTGAATCAATTAACTATACTTTTATAAATAAAATTGAGATTTATTCTTAACCGTTAACAGTAATACTCAAATAAATTATGAAAAAATTTAAAAGTTATAGTCAAATAAATTCCACTCCAAAATACATGATTTTTTTAGATAAAATACATAGACTCTTCAGAGAAATATGACTTTATTAACTACTAATAGTATCTTTATTTTTATACATTACTTTTTTGTTACAAATAAAGACTTTATTGTAATATTAGTTTTGGTATAAAAAGGTTGATATATGGAAGTAAAACGTCATGAATATTCAGTAAAAGTAACAAAACAAAAAAAATTATGTAGAATTAAAAAATAGAGTATTCAGTAATATTAACAAATATAAAGAAATCTACCATTAATGTACTCTTTTTTAATGTATAGTCCGAAAATATTCATTGGCTTAAAATATATAATATGCATATTTTTTATTATATTAAGTGATAATTCGGTTCTATTTTATAATTTCTTTTTCGGATAAATTAAGATAAATCTTACTAGATTTTTAGAGTAATAATAAATTCCGCATACATATATGTTCGAACTCGATATAATTGAAAAATGACAAAAATTGATACATAAATTTAATAAAATACCTTTTTTGTTTTGAAATGTATTTTGAAAATAGAAACATGTTTTACAAAAATGAATTTTTTTTTTTTACTTATTTTTGAAACTGTTTTCACTTAATTTTAAAAATAATAAATTTAGTTTTTAGATTTTAATTTTTGTTTTTATTCAAATTCATCCTTTAACATCACTTGTCATCATTGATCACTACTTTGACCAGCCGTAGATTCTGATTATTGATTACTTGTCGCCACCTCCTACCTGAAAGTCACCAATAGTCAACTCTAACTACTATCTGGGATCAATAATTAATTTTCAGTTTTTTGTTTCTAAGTGTCTAAGAAGGAAAAATTTTTTTTATTAAAATTTAAAAACAATATTTTAAATTTAAAGAGGTTGTTTATTGATTAGATTGGGGATGACTGGGTAGAATAATTTATATGTTTTTTTATGTTGTGTAGAAATGATGAAACATTTTATTTCTTCCTTTCAATTTTTGTCTGCCTTTCAATATTTCTTCCTTTCAATTTTTGTTTGCCTTTCAATATTAACTATTAATTTTTAAATTAATTATTTATTTTAAAGAAAAATAAGAGATAATATTAAAGTGGCCTGAAAAATAAATTTTGTTAAATAATATTTTTTATAAGTATAAGCATAAATATAATTTATTTTATATATTAATAATTAATAACTTTGTCAATTCCCTTACGTAACAACCTTAAATTGCTTATATTTCAAAATAGAGGCATATGTGAATATACGTACGTGTCATTTTTTACGTATTTTTTTTATAAGCACGTATGTACGTGTCATATTAAACTAGAGAAAACATATTATTTGTCTCTTTATACATATACTAATTAATAATTTAGTGAAGTATAAATATACTTGTACTTCTTAAAATAAAGTATCAATTAATAACTTCGTTTCCTTTAAATGGAGCTAATATGTGAATATATGTATGCCTCCTAAAACTAGCCAGCCAACATATTTGTTTCCTTATACAGAAACAGATTAATAACTAATAAATTTGTTTCATTATAATTTATAAGAAAACAACAGCCCTAAATTGCTTATTAGTATTCATAATTATATGTTTTCTACTTCTACATACAGTGAAAGCCAATAGATTTTTTAAGAGAAAATTAAAACCAGCTACTGTTTCGCTGCAATATTTAGAATAAAATATAGGATTCTGGCTAGAAGCACCTAAAAAAACAGTTATTTGTTTTTTTTTTCTTGAGAATCAACAAATACCCAAGAGATGCAAACGCTAGCTGTATATATTAGCTCTATACGCCTCCTTCTTCCGATCCAATAAGAGGCCGATATCTACAAATTTTTATATGATCGATGATTTAACGAGACAGCAAAAAAGTTTTTTAAAAAAAAAAAAGTTACAAAACTTGTTGAGCATGATCAATTAATTTCCTATTCCCACTTCGAATAACATTATATCCCAATCACTAATTAAGCTCCAGATTGTCTAATCCTTGTCCTCTGAGGAATACCACAATCAGCCTCTCTGAAAAGAAAATTGTATCAGTTCCCAAAATGTTGTTTGAGAAGAGTAATTAATATAAATAGGTTGATCAATTTTGTTTCACTTTCTTTGTACTCAAGTATATGCCTCGGACACCAAATAAGATTTAAGATATACTACACAAGCTAGCACAGGATCCATGAAGACACATTTGCCAACACCAACACGCAACACTGCCCTTTTTACTCGATCCACTTCAAGCATGCATACATCACTTCTGTCACAAAGGAATGATCCATAAAGCGTTGTCCCTCTCTTTTCCTTCTAATTACTTAGATATATTCATGTTTATATGAAGTTTATGATTGCAATTCAATAATCAGATCTATTATATGCTACACATAAGTTGCAGCACCCATCACAAAATTTTCACCCACGTTACAAAATTTTGTTGTAGTATATATATGTGCGCGTATTTTTAACTACTCATTTGACCATTTTTTTAAAAAGACATCGTTACTTAAGTTAAAGTATATGAATATAATTTTTTATTAAAAGAAGATAAAAAAAATTATATACAAATAATGGTGTAAAATATTATACGTACCGCTATCCAATTACACTTCATTAATTAGTATATGGTATATTTTAAATTAATTATAGTTAAAGTTATCCAAACTGTGATTTTTTATTATATGATAAAATAATTTTATATTATCACTACATCACCTTTAAATTCTCAAAACTACGTATAAATAATTAAAAAAATCTTATAAAAAAAAGTATGTTATCAAATAAAGTTTGTTATAAAAAAGGAGTTTATTAAAGTTTGATAAAGTATGTGATCTAAAAGTTTACGGTCTTGTAACAAAGTTTATATCTGGGAAGAGAGGAGGGAGAAATAATGAATTCGAATCCTTCCACTAACAAAAATTAACACGTTAACAACTAAGATTTAGATCCTGTTTGGAAGAACTTATTTACAACTTATTTAACCTTTTCTTATCATATAAACGTTTATACAAGCATTTATATAAGGATCATAGTAAATTGTTTTAAGTTTATTTAAATACGTTATTTAAAGTAGCTTTTTAAAAAAAATGTTTTAAGTTTATTAAAAATTCATACTTTTTTTTACTTTCATCTCAATTTTTTTTTTCTCATGATTAAAACTTGTTACTGAGGGCTTGATTGGTTTAATTTTGTTTTTTAGTTTTTAAAAAGAGTTTTCAAGAATAGTTTTCAAAAACTGTTTTCAGGAAGAAAAGAAAAAAAAAAAACTTGTTTGGCAAGTTTTATTTGAAAACTGTTTTGAAGATGTAAAAGTGGAAAAACTTATTCATATTTATTATAATTTTATTAATAAAAAGCAAAAAACAACATATTCTGATTGTATTTTGAGTTTTCAAAACAAAAACAGAAAACTGAAAAGCAAAACTACTTTCAGCTGTTACTGTTTTTTAGTTTTTAAAAACTAAAAAACCATAACTGTTTTCAAAACTGTTTTCAAAAAAACACTATCGAAACAAGGATTTTAGTTTTTAAAACACTATTGAAACAGTTTTATAAAACTGTTGCCAAACAAGCACTGAATCTCTCTCCCTCCCCTTCCCCCTTTCTCTCTTTTTCCCTCTTTCTACCTCTCTCCATCCCTCTCTTTCTTTCTTTCTTTCTTTCTTTCTTTCTTCTCTCTCTCTCTCTCTCTCTCTCTCTCTCTCTCTCTCTCTCTCTCTCTCTATATATATATATATATATATATATATATATATATATTTTTTTTTTTTTTTTTCTAATTGAAACTCAATTAGTGTCAAATTTAGGTGGAAATGAAAAAGAACCAAACATAATAACAATGAGTTTTGTAAAAATGAATAACATTTTCGAGAAGTAACTCCATACAATAGATATATGAGCAAAAAAACAGGTATTTTCTAGGCACAGGTTGTAGTTTGGGAAAATGTCAAGGCTATAGTGCTCCAACTATTTATACATCCATTTTTTCTCTTTGAACCACTCCTTTTTTAAATAAAAACACCCTTTCGAAAAATTAGTTTCCATTTTATTGAGATATAGTTTCTATTATATATCTATGCAACATACTCCACGGAAACTAATTTGCATAAAAGGTATTTTTGCCGAACAAGTTTTAAAAAGTAAAAAACCATTTATGAGAAGTGCAAAAAACATTATACAAATAGCAGCTCCCAAGACTATACTAGAACAGAGTGATAGAGTTATGGGAATTTCTCCAAACACCTCCATATTTTCTTCTACACTCCATTTTACACCCTCTAAAATGCTTAATTCGGAACAAAACTGAATGGAAGAAAATTCCAAAAATGTGGGATGAAATTTCTAGAGTAGTTACAATAGTTACAAGTCCAACCCAATTAAAGCACTTTTGTAATGGATATATTTAGATTTAAAATAAACTACACTATCATATATATATTTCTTTCTTTTTAATCATTACTTTTATATTCTTAAGGATGTTAGTGTAAGGTTTAAAACAGATATTAGTATAATATTTTTAAATATATAAGAAATATTAATATAATATATTTAAATTTAAAGAACGTTAGTGTAAGAAAATAAAAAAGAATAGAATTGTGTGTAATTTAATAAAAGTTGATGGAGTATTTATGTAATTTACTTGGATTTATCAGAGAAAATTTAGCAAGCATAAGAAGACCTTTTCTCCTTTGAAGAGAAAAAATTAGTACCACAATGTAATGTAAGAATAGAATTGTTTGTAATTCAATAAAAGTTGATGGAGTATTTATGTAATTTACTTGGATTTACCAGAGAAAATTTAGCAAGCATAAGAAGACCTTTTCTCCTTTGAAGAGAAAAAATTAGTACCACAATGTAATGTAAGCATATATACCTTCGTCATCCAATATTTAATAATGTGTTTGATATTGTGTTAGGTACCATTTGATGGGTGTAAACTTGAAATTAGAAAAACTTGTTTCTACATAGTTTAACTTTTAATACCTACAAATGGAAAGTTTGATGCATGTTGCATAATCATCTGTATAACATATAGACATTTTAGGTTCTGTTTAGAGGAATTTATTTATAATTTATTTGAGTTTATCTTACCATATAAACGAATATAAGTGTTTGGATAAACTTATAAAAATGTTTATTATATAGGGTTCATAAATTATTTTTAAGCTTATTTTAATAGGCTGTCTATAGTAGCTTTTTGAAAAAAATTATTTTAAACTTATTGAAAATTTGCATTTCCTTCAACTCTCACCTCTCACTTTTTTGTTTCTCTCATGATTAAAAATTATTACCGAGTCTCATTCCCGCCCTTTCTCTCTCTTTTCCTCTCTCCCTTCCTATCTCGATCTACCTTTCTATCTACCTATCTCTCTCTCTCCCGCCTCTCCCTCCTTCTTACTCTCCTCCTTTCTCTCGCTCGTTTTCCCTCTCCATCTTCCCCTCTCTCTCTCTCTGTGTCTCAATATCTCTCTCTATGTATATATGTATATGTGTGCATATATATATATATATATATATTCAAACACTTTATTTTGATTAAGAACTTTTAAATTTCTATATCCAAACACAAATAACTTATTGAATTTAAGAGTTTATACTATAAGCTCTTACGTAAGAAGTTCTTGTTGAATAAACTCTTATATTATAAGTTCTTCTAAATGGGGCTTTAGTTTACTCCTACCCAAAGAAATAAAAGCAGGCTAGAAAAAAAGGTTTCAAACTAGTCAAAACTAGGAATAACAAAAATATTCGCACTTATAAATATTGTTCTAATTTTGACAGATATTATCCGCTTTAACTAAGTAAGGATATGAATATGTAGCTATCTGCCCTGAATCTATATCCACCCATTATAATTATAATAATTATATAAGTTTAAAGTTATATATTTAATTAAAATTTTATTTCTTAAACTTTAATTTATAATTTTTTATTATTCTTTATATACTTTTTAAATTAAAATATAATTAATAATTTAAGATATAATTTATTTAATTATAAATAAATTAATTAAATTATAAAAAAATAATATAATGGGTTACTCGCAGAGATACTTGAATCCAAAAATATCGAGGATGACAATTAAAATTCATACTTACTTTTTTTACACTCGAGCTTGAACCTTCTCGCACTTTTAGGGGACAAGAAAAGTTATATTCACACCTATCTTGCTCTATTGCCATCTCTAGTCGAAATCACTTAAAAAACATCTCGTTTTATAATAAAACAATGTTGTCCTTGATTCATGTATATATTGAACCATGTCAACAACTCATCAAGGTTTTGACTTATAGATCTTGACTATGACATGTTGTCCTTGATTCATGTGAATACTTGTCAAGATTTCAGCTTAACCTTGATATGTAGGCCATGATTCACACATATGCCAAAGTCTTGTTGTATCTTAAGAAGGTAGCAGAAATTGAATCCTATGTACAACTTAACTACTGAAAATTAGAAGATTCACAAAGGAGAATGTTTATCAAAAGAATCAATTAAATCATTAGCTAATTAGGATTAATTAAATATAACTAAAAAGCCTAAAACAACTTAATTCCAAATTAATATCTATAAATAAGGGATTCATTAATAATATTTGACTCTCATGACTTTTATTAATTGTGTCACTACTGTTATGAGTTGAGACTCCCTTTTTAATTTGGATGCATTTTGGATCCAAGCAAAAAACTCTATTTCAAACCCTAAAAAAAGTGGTACATGACATCTCGAAGGATAATCATCCTTATCCATATCTTTTGCATGTACAATTTCTAAAAATTAGGCTTGAGTTAAAACTTGTTTTAACCTTATGAAATAAGGGGTTCTAGATGGTATCCCTATGGGTATGCTAGAACCCCTCTGGTCGCAAGGCGAGGGCATCCATCCCTCTACTTCACCACCGTTAAGTCAGAACTAGTAAAGTATCCAGTAGAAGTTTTTACTAGTAGATCAACCTTGTTAGGGTATGGAGTCAGCGTCAGTCAGTCATAGCATGCTGAAATTGAGTTATTCACTTTTCGGCGGAAAGAGCAAGGGTAGCCCGAAAATCTTACCTACCCCGCATTTATCATCTTCTAGTTGTAGCCTTCTTGCTAATTCTCGATGGGCATGAGGACAAATGCTTATTATAACAGGGCTACATGTCAGGTCTGTTAACCCCCCCCTCAATTGAATCCAACAATCGATAATATGCGATGTGTCCCTACGAACTGGTTTTACAACCTCTTGTGATATAGGAACCGAAGGGTAGCTCCTTATTCTTGGGTGAGGGGAAAGAGAGTAATTATTTACATTGTTGGGTCCCTCGAAGGGAAAAGATGTAACTATCCCCAAAAGGAATGTAGCTAACAATAAAAATAACTACTCTTAATTGTACTAACTAGTAGCTCCTTTCGATTTTCTTAACAAGAACTAATCTTTACCAATTATAAACTAAGCAAGAGAAGAAAGGGAACCTCGTGCGAGAGAGACCCTAGTACAAGCACTTGTAAAATTTACAAGCACGCAGTCGAGGGTTGTCCAACAACCCGAGAGCCGAAGGACTAAAGAGCTAGTAAAACTAGCGCTAGTCCATAGGATAAGCGTAGTGACTAATAGGTCTAAAAGAACCTAGAAGATCGTGGAGCTAGCTCCACTAGAGATAGTGAGCTAGAGATAGACCATGAGTATCACTATATATTTTATATGAAATATATAGTGATACAAATGTGATAGCTCTAGCTAGCTATCGGAACTTTAGAAATTAACAAATACACATCGAAATTAAGTGAAGGGTAGCTTCATGAAATGTAGTTCCACGCCGTGTACATCTGGATGCATGTAAGGAGCAGATTGAGCTAACGAGGCCATAATTTCTTAAGAGAATTGAGTAAGGTCTCTACCTACCTAACGACTAGGGAGCTAGGGGTTCGAAGTCCCTGTTCGAGTTGTATGGCCAGTTTTTTATAACAAAAATGAGTTTTTCAAATCCCAAAGGTACTTTGACTAAAAAAAAAGACAAAACTCAAGATTTGGATTAATAAAACACTTAGTAGGAACCGTTTTTAAGATCTGAAACACCCACAAAATTCGATTCGAAATCGGGTAAGGGGAGATTAACTATAGCTAGAGAAGACCACAATTCCCAAAGGAAATTGAGTAGGAACTCTACATATGATAATTGTACTATTACACACATGGGACAAGCACGTGCATCTGCCAGTGCACGTAGCAGGTGCACACGCAGGCACAGAAATGATAGGAATAAATGTCCAAGTCTTATTTTGAAAAAATGGACGCCCCGCCACAACAGGTGGGTTGCTTCCTCTATCTTCACCCAGGAGCTCTTGGTGAGGAGACCCTAGGATAAGTTGCTAAAACAAACGGGAGGGAAAGATTGATCCATTCAGTAGAATTTCAAAGAAAGACTGTTGGCAGCAGGTGGAGACATTTCTTTGCCCCCTTCAAAAAAGAAAAAGAAATGTGGGTAGGGTTTAAATCGACAGAGGGTTCAAGAATAGGGTAGGATCCCGTCGATAAGAAAAAAGTTGGTTCCAAACATTTATGCATGCACCTTCATATGAGTGTTGCATACAAATTCCGGCTAGAAATATTTGGAAACAAAAACCAATTTGAACAGCTCATATCACTTACCGTAAAAAAACCAATTTGAACCGCTAAAAAAAAGGCTATTGCTTTCACATCTTGTTAAACATAAAAATAATAATTTCCAAACATACGTTATGATGTTTAAAGGATTTCATATTGTTCTTGACTATTGATCCAAGACATTAATACCTATTTTAATGAAAAAATAATGTTCTAAATTGAATACAGAGTATATATTGAGTGTTTTTATCCCAATTTTATGTCAAAATATAATATAGACTATATAGTCTTGTTGTTTTTTACATATACATAAGACGTGTCTAATCCTTTACATAAGCTTCTCAAATCTGGGATAAAAAAATACAGTATTATACTTTAGACCTTGATTTTTTTTATAAAAAATACAATTAACATTTTATCTTAAAGCAAAATTATATGCTACAAAGGCTCTTCATAGTAAAAAATTATTGATAATATATGGTTGCTTATAAGTTACTTAGGGACATACACCCACCAAATATAGTATACAATGAAAAATTAAAATATAGTATACAATGAAAAATTAAAGTTTTAATATACATGCATAATAAAATTACACTGTAAATTGCCTAACATCAAACCAATTATTTAATACACAAAGAACGATGGAAATATCATTTTCGTCCAAGAAAGTCATAAACAGTAACAATTGAATTTTGAAAGAAATTTTTAAAAAAAGATTAGTCTTCAATAATTCTATCTTTGTGCAAATTCATTCTTAATGCACACTGGAAATAACTTTTTAAAGTGTTTTAAAATTATATTTAAACATCAATGACTAATTCATTTAAAATTTCTTTCAAAAATCTAAATGCCCATTTATAATTTTTAAGGAGTAAAATGATATTTTCACAATAGACGTCTAGGTCTTTCTATTTCTAACCTTCTTTTCTTTTTTCTTTAAAAAAAAAAACATGGAATGACATTTTCTTTTGCTCTGTACCGGAAGTGACAAGTTCATAGCACAATAGGCATGATAGGATCAGCATCTGCAACTTTAGACGTTTTAGATTGCTTGCCAACCATTGGCTCAACATCCAACCATTTTTGGATAAGTTTAAATACTGTTTCATCTCGTAATATTCCACGGTGTGTAGCAGCAACTCCCACCCTTTCAGTGGCTTCAAGTCCATCAGCCTATAATTTGAAAAGACAAAAGAACTAAAAAAAATAATACTTCTTCCAATCAAAGAAGATGCGCATAAATTTTATAAGAACCTATCCATAATGTTCTATTATATGTGTTAACTATTTTAAGGTTAAAATATTCCAAATTAAAAAAAAGAAGTTATAATGACGACAATTAATAGAAAGAGAGAAGGGAGTATTAATGACATAGTTTTGAAGAAAAAAATATATATAAATTTGAAACATATTTATTACTATCAATTAAATTAACTATTTCTTTAAGAGTTTTTTAATTGGTATACACGGTTTAAAGGATTTTTACACTGACATTCAATGATAACTTTTCATTTATGTGACTTTTAAAATAATAATGAGTAAAGATCTTTACACTGACGATGTATATCAATTAAACTTTCTTTAATTCTGATAAGTTGAATAATTCAGTTTTATAAATAGGTCTGGAAGGAGTAACACGTTGTTATAATTACTTCTGACTACATGACACGTTTATAGCAAAAGTAGTGCTATCAAAAGATAAATTTGGAACTACCACACTAAGAAAGCATCTCATAACTCAAAAAAATGGCCTTCTATATGGACTATTTCCATATGCATCTATCTTCAAAAGCCAGCAAATAATTATCTTGAAGTCATTAATTCTCTTCCAAAGCAGTGTATGAAAATTTCAACATGGCTACAGCCAAGTATTACACAGAATACAGAAAGATCAAAGATAGTACCTTTGCAGATTCAGTAGGAACTGTTCCATCTCCATCGACATAAGAATATAGTGGCTGAAAACATAGCGGAGGAAATTTCTTAATACATGCATATACAGTAAACACACAGAACAACGTCTTATTAGCAAGAAGCGAGAGGATACATACAACAAAAAGAGAATACAGAGACAAAATGGCAAACAACAAAGCAAAAAAATTTCTAATCTCTTTCTTATCAGTAATAGATATCCCCCTGAAACTTACATGAACATAAAACAATACAGGGCAGACGATATATGCTCTAAAATATGCACATTTCTCTCTCAACGAAAATATATGGAAGGAACTGCATATATCGTCTTGATAAAAAATACGAAAGAAAAAAATATGGCAAATACTAGCCTCTCAGTAGAGGTATAAAACCATACAGTATTAATGAACTATTTTTAAGGATGAAGATAGAGCAGTCTCCGTAGCAGCCTTCATCTAGGAAATGTAAGAGATTTAAGTGACTCACCATTGTGTGGCATATTTCAGATAAGTTCTCAATTGGAGATTGTTCCGAACCATAACTGCATTAAGCATTAACATTAGGACAAGTCAGAAGCAAATATAGTATAAAGAAACTTGTGAGTATTGAGAAGTGAAAACTGCATCTAAGCTCTCGTGAGAATAAGATTGTCCTTCCTCCTTATCAAGCTCAAATGTTGGTGATAAAATCTTCTTATGAAGACCAAACTTATGAAAAAGGATTATAAAATTTAAAAAAAAAAAAAAAAAAAAAAAAACAGATAATAGGAAAAGTTCAGAATATAAGAAAGTGATTACAGGGCATTGTAAAATTCAGGTCAAAGTTGTTAGGATGATAGACCTCCCAATATCAATTTTGAAAGGTGATTCAGTTTCTACCAAACTTTCCCATCTCTCAACCTAAATTAATACGCTGGTTTATATATCTACTTTATTTTCCAAAGGGCAATTTAGTCACGTACCAAACATCAAAAGGTGTGTCCAATGACGTCCCATAAATGTTATAGAAGCAGACTCCATCTGGCAGTTTAGCTTTAGCTATAAGTTGACGTGTTTCAACAGCCCAGTCAAGGATATCAAAGTTAAAGGGCAGTGATATCATTTTCCCATTATAATTTAGCTGCAAAAAATAACAGCCATAATAAGTACTTGGTATAAGTAAATAGGAAAATTGCATGAGGAATCATTACTTTTATTAGAAGAAGAAAGATAATGTATCATATTATATGATTTTCATGACTAACACAAACAGTTTCTTGGCATTAGAGATAAAAATTGCAAGATGACATTTGCTTAGTTTACTAAACAAAAGACTTCATGCTGACTTGATTTTCCTTTATTAAAGAGAGGTCACTTGAGCTACAACCAGTGTCCTGCGAACAGGACCCAACCAAAACAACCAGTTTGGCTGATTGAATCCAGAACTGATCCAAGGTCTGTTCAGTGCATAGGTAATAACTGCAGTTGGTCATAACTGGTTAAAGACTATGCAGGTCAGCTGGTTTGGTCAGAACCAGTCAAACCAACTGCAGAGAGGGGTGGGTCAACCAGTTTATGTCAGTGTGCCATGGCAGCTCAAAAAGTTGCATGGAACAAAAGGTTAGGAGTCTAACCCAAGAACTTGACATGCAAGGCTAACGAATTAGCCATTAGGCTAAAAATGTCTTATGGGCCTTTCGTTTTTTTGCTCAGCAAAATGCTTTACGGTTTAACTGATGCACAGTAATATATTTATTAATCAGATTTAGTTATAAGACCCCATTTGGAAGAGTTTATTTATAACTTATTTATTTGAACTTATCTTATCATATAAGCGTTTATACAAGTGTTTGAATAAATTTATAAAAACACATATATATGGTCTATAAGTTGTTTTAAACTTATTTAAATAAGCTATTTAAAATAATTTTTTGAAAAAAGTTGTTTTAAGCTTATTGAAAATTTGTACTTCTTTCGACTCTCACCTTTTTTTTATTTCTCTTATGATTAAAACTTGCTACTGAGTCTCTCTCTCCCTCCTTCTCTTTCTCTCACACACTCTCTCTCTCTCTCTCTCTCTCTATATATATATATATATATGTAGAGAGAGAGGATATATCATATGAGAGTAAGATATCTTATAGGAGAGTAAGAGGAGCAAATCAAAATGGTATTCTCTCTCCTCTCTCAATGGTTGAGTTTTTTCTGATAAATTTGAGTCAAATTTATGAGAGTAAAAGCAAATCTCAGCCATTGAGAGAGGAGAGAGAATAATATCCAAAAAATTTCAGCCATAGCGAGAGGAGAGAGAAAAAAGAGTGATAGATAATAAATGCTAGAAAAGAGAGAATGAATGGATGTGTACAATTTGATTTCAACCATTAATTTTGATTTCAATGATTTAAATTTGCTCCTCTCACTCTCATAAAAGATATTTTACTCTCATATGATATGCCCTATATATATATATACACATACACATAAGTGCTTTTATAAATTTGTATATCCAAACACAAATAACTTAGAGTTTAATTGGTATACACTGTCAGTATAAAAGATCTTTACAGTGACATTCAATCATGACTTTTCATTTATATGACTTTTAAAGTAATAATGAGTAAAATCAACAAATTTACCATGAATGAAGGGTTGTGATTGAATGTCAGTATAAAAATCTTTACACTGACAGTGTATACTAATTAAACTCAATAACTTATTGAATTTAAGAGCTTACAATATAAATTCTTATGTAAAAAAAGCTCTTATACCATAACCATAACCTCTTTCAAACGGGGCCAAAGTCCTAAACCATAAGCCTTTTTACAATATAGATATTTGATCAAGAGAAAGGGAGAAATTAAAACTAGGGGAGAACACATTATCTTGAAAACAGAAAAAGGATATGAAGAGAATCATCTAAAAATAAATAAACAAAAAAACTCAAGAATACAAGTCTGTAACCACAAACAAGTTATCCTGAAAACAAGAAAAAGGATATGAAGAGAATCATTAAAAAAGAAAAAAGAAAACACTCGAGAATACAAGTCTGCAACCACAAACAGTATATTGAGAAGGATAAAAAAAAAATCTTATCGCCCCACCCAAAAGTAAAATAGTGGTTATAGAAAGTGAGAGGAATTAATGTTAGATAATAAATTACTTTGTTTAGTCATCAAATATAAAATTTTGAAATTCTAACTGCTAAAAATGATAACAACTTATGTTATAAAATTCAACAATAATAATATAATTACCATATGAATGTAAAATAAAATTTTAGAATATTATCATTCATAAAATTGATATACCTACAATGATTTAAGAAAGCGTAAATAATACATATATATCTCAATTCAATAGTTTCCATATCATCTTATAATTTTGTTATCTATTTTTAATAGTATTATATTTTAATTTTTTATTGTATATTTCATAAAAGTTCAAGTATGCTCTTATCTAATTGGTTCAATGGAAGGTAAAGGAGGGGGAAAACAACTCTACTCTTGTATGGCTCATAATATAAGGGGAGAGATTTTAAAGTTAATTACTTTTTTATCCTTATTATATTTTAAAATATATGTCACAGTGATGTAACAAGCTGCACCCATGACATGTATTTTCCTTGCTTGTGCGCCTTTCACACCTAGTGTTCTATGTCATACCGTAGTGGGTAAATCCTAATGCACTTTCTCTTCTAGTATGCTTCCCACACCATACATCTGAATGACAGATAAAATAATTGGAGAAACATGGCTATGAAAGGTCAATGCTAGAAGGGAAGAAGCACAACTTGATGAGAATTGATGAGGAATAGAACCCACATATAATCATGAAAAGATTTAGAACATTTAGTAAAACCATATAAAATTTATCAAACAACTTTCCCTTCCTCTAAATTCCCAATATTCAATATTGGAGGGAAGCTAAAATTGAATGAGGAGGAATTTTCTCCTCTTCATTCAACCTCAACCTCCTCGCTTAAAAATTGAACCAACAAGAATTCTTTTTTTATCTTTTCACTCCTCCTTCAAACCAAACTGGACGTAAAAATGTGAACAGATTATTTAGTAATCATATCAGAATAATCAAAACTTCATCATATAAATCCTTGATCATTTTAAAGCATATATGCCCACACATATTACATTCATCAACCTAAAGAAAAGTCTTTTTTTATAGATCAACCTTAAAGAAAAGTTAAAATAAATTACCTCATTGTGCCTCAGTGCTTCTTCAAATAAAGAGATACTCTGCATTGGTCCATAAGATTCCAAATTGATGCTATTGTCCCCATCCTTGTTATGCTTTCGCCAAACTCGAATTTCTGGCTGCTTTTTCCATTCATAATTCGGATTTGCCATCATCTCATAGATTGAGGGACACTCCACTAGCTAATGTGGTAACAAAGATAATTCCAATAAACTTAGTTGTTTTACAACATGTAACAAAGAGTAAGAAAATTGTGACTATTCTCGAAGGAATGAATTAAACTATGACCAAGCTTTGGATCTCAGGAACTAGTGGACATGAGCTACAAACATTAGTGAATATCTGTGATGGGTGCCATAGAGGTTCAACAATGTGGAGCTTTCAAGGGCTAAGTTAGAACGGGTAGTTGTAGAGAGAAGCTCTCAGAAAAAGCATGAAAGTGTATAGTTGTATACATAGGAATTGATCTTAGCCATCGTATACTCCAAATAAGAAAACAACTCTGGCATCCCTCACAGCCCTTCTGTCCCATATGCACCCATATCCACTAGTTCCAAAGGATTCAAACCATGCAACTAATTCCTTTGAAAAGCTGGTTCTTTTGAACTGGACCTTGGCCCCTTCCTTTGCAATGATGCCATGATTTAAACTTTAGAAAGTGCAATGGAAATTTTTCCTTGGAAGAATATTATCCCAATGACCAAGGTGCTGACTGAACTAGTTAATTGAGAACAAGAATTTACCAATTGATGCATAGTCCACCTTTTCACAAAAAAATAGCTTTGAAATCCATCAACAAACTCTAATCCTGTTAATAAAGAATCATTGATGCACCCTGGGGCTCCTGTTCATGTGCAATTCATATTCAAGCATGGATGGTTAAGACATATGGGAAAAGAGAATAAAGGAAAAGTATCCTAAGCCCTTTAAAGCAGAGCAGGGGGAATTTTTTCAATATATTTATCATTGCACATTTCTCTGGCACTTTCATCACACCAATATATTTATAGTACGGTCTATTTAAATATCATCTACAAGAAAAGAGACTTGTTACTCTTAGTAACCAAATGTCAGAGACAATTATAACTTGATATTTATTTCCATCCAATCTGTGAAAAAATGTCCAAAACAAAGGAAGTCCCTCATAAAGAACAGACACATGCTGCTAATTAAATCAATGAAAATGAAAACTTCCATCTGAATATCAAGAGTAGATAATTAGTATTAAGTAGTTTCACAAATTTGTAGAATAGCAAGGTTTCCATTATTTCAAATTCATCTTATGAGTTTTACATAGACTATATCATATATGGCTGTCGTGGAGTGCAAGTTTATATTCAGCAAATCTATAACCTAATGTTTTGAAATTTTCTATCATAGACGATACAATTAACTATTGATTACCACTATACACACTAGAAAGGGTAAGCCAATTGAGAGGAAGAAACAGAAAAGCAAAGGAATCACCTTGGAAAGGGCAAGCCAAGCAAATCCACTTATTCACATATTTTGTAAACACCTGCCAAGGAACAATGTAAACAAGCACTAGTTATGCTATAACTCCCATCGCTATATATTGTAGAAATAGAACAAGCATAAGAGGTGATGGAGAAAACTATGCACACATCTCTGTGAAGCGACATGAAACACAAGATCATAATTCCTCCCATGGAATGTGAAATTAAATTGACTTTTCTTCCCCCAGAAGCTTTGTAGACAGTTTCCAACTTGTGTTGAAGACCTTCCATTACCTTACCAATCCTACCATCAGCAACAACAATACTAATAATAAGCAAATAGTTTGGACTTACCTAGCTCCATAATCACTGGTAGGAAAAGATAAAATAAAATTTGTCATGAATTAAAAAGAAGCATTTGGAGAAATTAACATGAGAGTGACTGTAGAGAAGGCAATTAAATATAAGTGTTTATAGAGCAAATATGAGCAGAGCTTACTTAAGAAACAGAGTGGACGGAGTTTAAAGTAGATAACATTACCTATTGCTTTGGCGGAAATCGTATCCGTATCCAAAGAGCGTGGTTCCCTTCTTGTAACCGCATCGAACAAGCATGTCGATCATGTCATGAAAATGATAAACCTCCGTCAAATGTATACATTTGGTAAACTGCCACAGAACACAAACTTAAGAAGAGGAATTGAAGTAAGTAGAAGCAGTTAGAATTGGTCAATTAGTCTTACCCATGAGGGATCCAAAATATCGATTGCATAGAGGCCATGATCATCGTCAGGGACCACAATATCGGACTTGTTGTCCAACGTTTCAGTGTAGCCTGAAAGTCCGTGAGAATAGTGATTTGTTTATTTAAGTGAACAGTTAGAACTTAGAAATGCATTATGCATAGAGACCTGTTTGGGGATTGTAAATGGACCAAATCTTCTTTCGGAACTCGACGTCAGCGAGGAGGAGTCTGACCCAAACCCGAGTGGTGAAGCCGAATTTTTTTGGCTTGGAATTGACAATGGAGCCACCCATGCCCGAAACCAGAAGGACCGGGTCACGATCCGCGCCCTCATTGGATCCAAAGCACGGGCAAAAACGCATGGCTTCTGCTTCTCACTTCTCACTTCTCACTTCTCACCCTCTCAAGCTGCTCAGGCTCGTGGAGTTCCACCAAACAAGGAAACTCTTAACACTCCGCACCAACTGTGTATTTAATTCAATTATGTATTATTGTAATACCTATTATCTTTTGTTTGTACTTGTTACAGCAAAATAAATAATGCATTTCTTTTCTCTTCTCCTAGTCGGAATTCGCATTGAATTCTGGACTTTTGCGCTTTTTCTACAGCAATAAATACGAAGGAAATCACTGCCCACCTCTGCGTGTACCAGTCTACTCCACCCGCCCATCAATTTTGCACTCCTGCCCTCCTTTTTTGCTTTATTTGTTTTACACTGCTAACTAATATCTACCACCACTACAAATTACAACTTCATTCCATAACTAGTATTCTCTCTTTTCAAAATTCATCCATCTTTTGATATTCAAAATAACTTCTTTTGTTTTTAGTTTTTAATGACATATTCAAAGTCCAAACATCCTTTAAAAAAAATTTAATTAATATACACTAACTATTACTAATATAAATAAATTTACATTTATTTTTAATCACAACTCTTTAAAGTTAACAAATTTACAGTAAATAAATAGTGGTAAATAAGATATACTAATTAAATTTTTTAAAAAATGAAATATTGAAACATTTATTTCAATTTTATTCACTAATAAACAATTTATTTTAAAAGATTTAAAGGTACTTTTAATATATTTTACAAGTAAAGAAACTCACAATTACTTTTAATTTAAAACAATAAAGCACGTTGTAATGTATCTTAAACACGTTGGAAGTTATTTTTTGTTTCCAGTTTTTAAATTTATAAAAATAAAAATTACTTTTAGTTTTAACTTTTCAAAATTATAAAATAATATTTGTTTAGTTTTTAATTTTAAAAGATTGTTTTCAAATCTTAATCTACTAAAAAAAAAATTTTTAGTGCCAATAACTTTATCTATTATTAGAGGTAGCAACTCATGACAAGCAACAAGAGGTGGCAGTGACTAGAAATTAGAGATGATCAATTATCAATAAAAGGTAATTAATCATAGACGATTTATGATTGTTGACCAATGATGAATAGTCGAAATGATAACCCGTGATTGATAGTCAAAGGTGATAATTGATAAGTAATAATTGGAAGATGACAATTGGTAACTCAATGTGAAACAGTTGAAGTGGCGGTCTATGAATAATAGTTAGAGGAGATTATGTGAGTTAAGATTCTCTCCATTTTCTTCTATTGCTAAGTGTTTCAATATATAAATGTTACATTTTATAAAATGTATATCTTTTATATTTAATTAACTTTTTCAAAGTATAGAAAATAAAAGAAACGAACAAAAAGGAAATGGAAATGATTCATTTCCTGATTATGACTAGTGGTCGTAGTTAACAACTAATTAGCAACAATCAGAGATGACAATAAAAAGTGGTGTACGATGATCAACCCTCAAAGGCAACAACTTAAGACCAATGATCAAAGATGGTAACTAATTATTGAGTGTAAGAGGGAGTGACCAGTGATCAACGATCATAGGTGGTGACCGGTAACTAACAATTAAAGATAGTGATGGTTGATGATGATATGGATGATAGCAAGTGATGACAAACAATGGCTTGATTAAAAATAAAAATAGAACCCTCTAACTAAAATTTATTGTTTTTAAAAGGAATAAAATCTGTTTTAAAATTAACTAAAATACTAGAGTAGTTTTTTGTGAATGACACATTTATGTTTTCAAAATTATTTTCAATAAAAAATCATAAACTAAAAATCATCCAAATAACACCTTTTAAGTGCTATTTTTTTTTAACAGAGTGTATTTATTATTACAGTTAACTCTATCAAAATCCAATTATTTACTTATTGGACGAGTTCCTGTAAACAAATTTTCAACTATGTGAAAAGGAAGTTTGAGGAATAAAACGGGAATCTGAGAAATGCAAACAAATATATATATATATATATATATATATATATAAAATAAATGTAACAATGTGTTTTAAAATTCTATTTTTTTTATAAGTGAAATGTTATTAATGTTAGTTTTTGTTAATAGTGAAGATTGAACATGTAACTTGTGCCCACTCTTACTTCTCTAACCAATTGAATCACCTTATATGTACTTTAAAATTTTATGCATTGTAAGTTTATAACAAACAAGAAATTATTAAATGGTTATGAACCACATCGTCTATAGTCTCAACCAATTACTATGCATCGTATAATTATTCAATTAACTTATCTTGTAAATTTAGCTAATTAAATAATTATATGTTGCATAGTGATTGATTGAGACTATAGATAACGTAATGGTCTGAGGCCATAAATCGGATTGCTATTTCCTATGCTATTTGTCCTTTTCGAATAAAAAAATAAGTTTTAATTTCAAAGGTGGGAGTCTTACATGAGAATAATTGGGAATGAGAATTAAGGTGGAAAAGACTGTTTCTTAGTTGGGAATTTGGTAGGAAGGATGAGTTAACGATGTTTCTTACAAGAATTCAATTAAACTCGAAGATAGAAGATAGATGGAAGTGGGGCAAAAGATCTTGCAATGATGAAAACTATTTTGTTAAAGAAGCCTACAAGACAATCCGTAATCATCTTTTGGTACAAAATTCTGACTTCTTTAAGGTGATATGGAAAGTTTAACTATCGTCAAAGGTTGCAGCCTTTGCTGAAGGGTAGTTCAAAATTAGATCTCAATAAAGGTGGAGTTGGTAAAAAAAATGTTCAATTTGTTGATGGCAAGTTATGTATTGTCTGTCTTAATGATCCCGAAACTGTTTCACATTTGTTGTTTTTCTTATTCTTTAAGTTAAAAGATATGGATGAATCATTATTGTTGGATAGGGCATTTGGTGGCAATGCCTTTAGACTTCCCTTCACACATGTGACATCATCTTGGGCTTGGGAGTGGAAATAAAAGCACAGAGGTCATATGTGTAATATGACTAACAATCTTATGGTCTATCTAGCTAACAAGAAATATGATTATATTTAAAGGAAGTCCATTTTGTGTCACTTCAGTTTGGCAATAAGTGCTACAAAAATCTTAGACATGAATTCAGGGCTTTTACAAAAACTCATCGTTCTCCTTCTATGAGGGGACCATGCAGTCAGACTATTGTATTAAAAGCCTGGTAAGGAGAATAAACTCTTAATCTTTGGGTGGATCATAATTATCAGGAGTATTATGACATCATTTTAGTTTTCTTTGTCTGTAATATTTGAGGAGAGGTTCTTTTGTATTATCTATTCTGCTTTGGTCTTGTATTGTGTTCTTTAATCTGTTTGTGTTGTAAGTTCTTTTGATCGTGCTTTATGATTAAAAAAGTATTTAATTGCTGAATAAAATTTATTGTCTTTACATGAAAGAAAAAATAAGTGTGATAAATAAATAAAAAATAGTTGAAATTAATAAAATGAAGATTAAAGAAATTGGTATGGAAAGATAGGAAAATTATAAATAAAGTTATTATAACTATAAAGTGCAAGCAAAACAATGAAAATTTTAGAAGATAATTTTTTTTTTGCAATTTATTGATTTTCATATCTATTTGAGTGAAAAGAAAAATAGCTGAGACCCACGAATTTTGACATATTTACTTGTTTTTCACAATTTTTTTTTCTCATATTTATGTGAGTGAAAAGAAATATACTCATACTTAGATCCAAATCTTATACATACGGCTACTCTCGTCACCAAAGTATCAAGACAACAACCAAAATGACATTTGATTATTAGGCAAAGGCAAAAAGGAACACATAAAAATGCAGATCACTAAAGAAGTTATTGGTAGTTGAGAGAAAACGAGGAGCACCTAGTATAAGTTAGGCGTAGCTTGAAGAAGGGAGTCTCTATTAGAGAAAACCCATTAGTAACTTTGATGTCTTCATTTTGGTATACACACTTGCCCTTACGAATAGGGGTGTTCAAAACGAACCAATTCAATCTAAATCACGACACCAAACTGAAAAATGAAAAAATCAAAAACAAAAAAAACCAATTTTTTTGTGGTTTGATTCAATATTTGTTAGTGAAAGCAAACCAAACCGCACTGCATGTTTAGTTAACAAAACCGATGAATACGTTTTAGATAAAAAAATGAATTAAATTTTGTTGCTTTATTGATAGATAATTAGACAATTTAACTTATAAAAACATCAAATATTTGACAATGTTAATTTTATAGTATAAATATTAATGAAAATTATGTTTATTGTGTTTTAAAAAAAAGAAATTTAATAATTATTTTTATTAAAAAACTATTGATACCAATCCAAACCAAACCATAAATAGATTTGATATTATATTCAAATCAAATCAACTGTATGTTAATTTTATGTTTGATTCAATTTTTTTTTACTTAAAAACCGAACCAAGCCATTGGATAACCCTTCTTATGACGCTTGCATTTACTTATGTATATAATATATAAAGACTTAACATAATATAATATGTATGGTTATATTAAGTTTTTAACACGTTAACTGAATATCACATGTGGCTCGTGTATAAATTTATGGGCTTACTTATACGAGAATATCAATTTCTCTTTTTTTTCCCCCAACCATGCAGGAACCTTTTTTTCCTAATATGTATAAGCACAGTGTGGTATGTTCGTCCAAAGAAAAAAATATATCCCATATTCATTGATTTGTTAATGTTTTTGAACTCCACATTTGATAAAGTTGAAGACTTTTTAATTTAATATTTACTTTTTTTTTAATTTCACACCTACTTTTTTTAAAATTTTTTAAAATATTTATTTTACCCTCTTAACCCTATCTTTTATATTTTTCTATTTCTCATCTCTCACCTACTATTTTTGCTGCCTCTCTTATCTTCTCTCTCTTTCCTCTTCATTTTTTCCCCATTCTCTTTTGAACAACCTCCCTCCTCCGACTCACCACGAACCTCTCATCCTAAGCACCATATCCTCACCACCATTTACATCTACCACCACCCATTGAGTTATTGGTTTGACCACCCTAAACTTGACGTCTTCCTCACAGTTCGATCCAAAAATAATAAGGTGGACATATATTTATTTTTTTCTGACGAGATACCGTCAAAAAGTAAAAAAGTATAAACTTTTTATACTTCTATGATGAGATACTGCCAGAGAAGTAAAAAAAATTTAAAATTTTGCAAAGAGAAAAGGTGAGAGAAGAAAAAAATTTATAAATTTTTTTCTTTTCCAACAGTGTACCGCCAGAGAAAAAATATTAAAAGACAAAATTATATTTTTCGCACCGGTAAATGAAAAATGAAAAATAAATAGATATTAAAATACCCAAGCTGAAAGGCTAACGTTTTATACATATTAGGCGACATGAAACAAAAGCGAGAAAATAACTTGTGGCAAGATATGTAAGAAAAACAAAATGGTAAGGTTAGAGGGAAAATAGTAAGAAATTGAGGAAGCAGAGAATAAATTAGTTATAAGTTTTCTTTTGCAAAGAGAAATTAATTAAATATGAGAGAAGAAAAAATTGTAAAATATGATAGAAAATTAATTAAATAGGGACACACGTTGTTCCCCAACATTACACAATAAACAAATGCAGCCACGTGCTTAGTGAAGCCCTAGTAGAAAATTATGGTACGGCACTTAAATGAGGAAGCAAGCATCTAAAATTCCAAATGGCATATCCTCTTACCAGCATTGGCTAAGCTTAGCTAACAAAGGCATGGTGGCTGGTGGCAAGACTGCCAGAGAGATATCAACGGATTTCCCGAATATTCCTATTCCTTATCACATTTTTTTTTATTTCTATATATATTGAGATGTTGTGAGATTAATGACAATATATAATATGAAAAGTGCAATAATATATTGAAATAAAAATATAGTTATAATAATAACCTATAAATAAAATGGTTCAATTAATCTGTAGGTCCTGTACTTTCATTACATTCGTAATTGAGCATCCAAAATTTTCTATTGTAATTAAGTATCTGAACTTTTTTTTATTTCTTTGTAATTGGTAGCTGAACTGCATATCCAATTGCGAGCTAATTTTATCTTTTTTGTTTTAATAAGTTAACTTAATAAATTGCCATTATCAACTAATTTTTAACTATTAAAAAAAAAACTGAATTTTTTACTTTCAATACCATGTTACTGTATTTGTACAAAAAATTACTAATAAATTATCATATTGGTACCAAAATGAAATAAAAGTTTAATTGGTATATACAATTAGTATAGAAGATTTTTTCGCTGGTAATATTTTTCATTGATGTGATTTTTAAAATAATAATGAGTAAACAAATTTACTATAAATGAAAAATTGTGATTAAATGTCTGTATAAAAATCTTTACACTTACAATGTTTACTAATTAAACTCATGAAATAATATATATTTGTTGACTTTTATAGTAATTATTTTAAAAGTTAAAAAATATATTAAGTTATAGTGGTATTTAATCATGATATATTGTATATAAAATGTTGGTTGAATTTTATAATAATAAATCTAAAAGTCATACTAATGATAATTTTTATTGATTAAATATTAATATGTAATTGTTAAACTCTTAAAAATTATAAAAGCATTTTTAGTGGTGATTTTTAATATAAAAATTATTTACAAAAACTACAATTGTAGCAAAACATCAAATTTGGTTATTCATGTAAATTTGGATCAATTGTAAAATAATAAAAATAAACTTATAAGAATTCAAATAAATACAATTATTAGAAAAAAACTTTATAATAACTCTACAATCTTATATAAGTTTGTAGTATGCTCTAAAATTTTTTTTAATTAATTTACCATATACTGAATTTTAATTAAGTCACCAGAATTTAAAAATTAAACTCTGATATTTATATACGTGTGTAAACATCATATATTTGGAACAAGTTTTTGATAAATATTAGAGTAAATTATGGTCATGTTTTGTTAATTTATGAGAATACAAATATTCACATTTCCTATGTTGTCATTATAATTATATATATATATATATATATATATATATAATATTTTTATAAATGAAAATTAGTTTGTATTATAACTATTTATTTTTACTTTATTCCTTTTTATATTTTAATTTAATTTTTTGTAATAAATAAAATTTATTTTTTCTAAAATTACCAAATACCAACTTGTTCGAATAATATTTTTTAACAGATATCCTTATTATACTTTAAAGACAAAAACATTATAATAATTTTTTGTTTACTAAAAAAACTGAAAAATCACTGTCTAATTTTTGTAATTTATATCCTTATACTTATTTTAAAATTAAAAGATAAATTACTTTGTAGTAAGATAGACTGATTCAAATTTACAACTTCTCTCTCGTCAAATATAAACGTTGCAACTAGATAAATCTTATAACCTTAAAAAAATAGTTTAAAACATTTTTATCCAATATACTTAATTGTCCTACTATCTATAAGGTATGATGTTATATTATATATTATCTATACTATTAATAAAGAAAATTATCCCTTTTAATGCCTTTTTTCAAAATAGTTATTCCACTCTTATACCTATTTGAAAATTAAAAAATAAAATATTTTGTTATAGAGGAGATTTAAACTCACAACCTCTCTCTTGCTAGAGATCAACCTTGTCGATGGATCAACCTTATAGTTTTAAGAAAAAAAGAATTTAAAATATTTATATTCAAGATACTTAATTGTCTTACTATTTATAATCTATATGCATAATCAATAATATATAATTATTAATATTATATTTTATATTATGTATTATATTATATAATGAGAATATGACATTTTTGTGTTCACATTTTATGATTATTTTACCTTTCTAAACATTTTATGACTTTTTTCAGTCTCACAAATATAAGTTCTGTTAATATATGTATACCTTTTATCATTAATATTTTTTAATAAAAATACAAATGAGTTTAATTGGTATACACTGTCGATGTAAAAGATTTTTATACCGACATTTAATCATGACTTTTCATTTATGTGACTTTTAAAGTAATGAGTAAAGTCAACAAATTTACCATGAATCAAAGATTGTGATTGAACGTGAGTGTAAAAATTTTTACACTGACAGTGTATACCAATTAAACTCAATGTGAATATACAAGCAAAACAACATTAACTTGATTGTAATTCTGTTATATTCATTGATGATCTAACATATTTCTATCATGTAATCATAAACAAAAAAATTATAAATTAACAAAATATATTTTATCATATTATACGTAAAATAACATAATAAATTATTCATATTCTATTATATTATTATAAAATATGTTAAATTAAAATCATAAATTTATTATAATATATTAAAATATAAATATAAATATAAGTTTTAACAAATAAGTTTGTTTTTTTTTTATACCTGTGATGACAATAACAACTACCTACAGTTATGTATAAGCATGCCACCTCATTACAAAATCTATATAGATGAAAATCTTTGAAAATAAGTGGGAAAGGAACGTGTGTCTCTACTCTTTTTACTCTATTTTTAGAAAAAAAGGCTTTTTGGTTTTTTAAATCAAAGTAGTATGCTTTTGGTAATTATTTATTAAAATCAGACTAGTAAAAGACTAGGTAAAGTATATTTTAGATTTTAAAAAAAATTTAATATATTAAATATGTCTCTCAATTTTTTATATTTATTTGGTTTCTCTAATTTTAAAATTAATTTTTGTGTTCTTTAAGTGTGGTGATATCGCTCTTCATATAGATAAAAAATATTTAAAAAACATTTGAAGACAACAAATTATATGTGTAAAAAATAAATAAACCAAAATATATAATACAAAATTTGTTAGAGAAGGTATTTAATATATGAGAATTTTTACTTAAAACATATCTTACGCTTAAAGATATACTGATGGGAATGACCTTAACTACAAACTACTCCTTTTGATTTCTATTTCTCTATGTAAACTAATTACGATTAAATGTGATATATAATTTTTCACAATTTTTTTTAAAAGACTTTCTTGAGAAATTTTATGGAAATTCTTATGTTAATAGATAATATGATAGATTAACTATAACTTTAAAAAATTCACAAATACTTTTTATAAAATGCTTTAAAGTAAAATCAAATTGTAAATATAAATACTGTAATAAGAGGTGCATGTGAGTATTTTTATACTAATTCAGTCAAACTAAGTTACATTCAATTTTTTTTTAAGTACCTCTTTGAGTTTGTCATGTCATTGTTTTGTTAGTTGAATGATTTTTTATAGATAAATTTATATATAACTATTCGATAACTATAGAATAGGATGTTTCTTATGTTGTCAATGTAACAAAACTTTTGACTTGTATATGAGACCTTATAGTCTAATATAAAATGTTTTCTTGGTTCTATGTTAGTAGACACTCTATAACACAGTTAGATGATTTTATATAAGCTTAAGAGTTTATGATGTCTTTATAGATGATCAATATATTTACAATATAGTGAGACCGTATTATGAGTTAAATCACATTTTGATGTGTGGGATTAATGCTTTATGGAAGTAGACACTTCTTATATAGGTTTTCTTATCTCATAATACTTGTATCTTGTTAGACTATTTCCATATGGATGAATTGTTCATCCTACACTTATGATAACAGTCATTCTTTTATCTTATCTGTATATAACTTTTAATATAAATGTTAGAAGATAAATTATAATACTATCATTAAATCACTTAGAAATCATGTATTACTTTCCCTTAACAAGGAAGTGAGTATAGGTGTGAGAAAATAGGAAGTTTTAGCTAATTGGAAAAAATTTTAAAAAATGCATCTAAATTTGTTTTTTTTTTCAAAAGATACATATGCAATTTACTTATTTTTTTAATTATTGCTAAGAATTATATTTTTAATATTAAAAAAATTTCGAATTCTATGAATATTGTACCAATAAAGTTAGTTCGTTAATTGTTAATATTACAATATTTAATTGGTTTAATTAAAATTTTTGTTCCTCTGTTTAATAGAATGTTTAATTGCGTTTTATTATCATGTTTAAATTTAATTTTGTCTCATAATTTTTAAATAATTTTAATTTCATTTTATTATTATTTTAGATATATTTTTTTTCCTATAATCAAATTTTGTCTCAATTTTGGTGCATTTAGGTAAAATTTTATATAAAAAACTTATTTTATTAAAATGAGTCATTTTCTACTCAAAATGAGTGGTTTTGTGCTTATTTTAAGAAGTAAATTGTATTTAATTATTAAAAATATTTATTTTAAAAGCGTTTATTTCAAAATTACTTTTTATTGAATTTATCCAAATATCTTGTTTATCTGACTCAATTTGATGTTTTTAAATTTTTAAGATTTTTAATCTTATTATTTTTTCTGTGTTACTATTCTTTTATGATGATTAAAATTGGTTGAAAATGATAAATTTTAGGCTAAATTACTATTGTGGTTTTCTATTTTGTCATGTTTGTTCACTTCATGCACCTAAATTTTATAAATAGTGTAATTTTTGTCCTTCCGTCATGTTAAGATAGTTGTCACTATCATTAAGGTTAATTTCAAAAACACCGAAATCAAACATGACGGAAGAACAAAAATTATATTTTTTATAAAGTTTAAGGACAATAAATAAGAAAAAAAATATAAAAGAATAAAAAGTACGAAAGTGACAAAATATAGACATGCCAATAATATACCAATAATAATTTAGTCTAAATTTTAATATATTCCGCTTGTTATTTACTCTACTAGCAATTTTTGTGTGTGTAAAAATTTGAGTCCTTATCATCAACACTCGTTAATCTAGTTCTAACATGATTAAAAATGAATAATGTTAATTAAGATAATGAGAGGTTTTAAATATATAAGCCAAAGGGAGGAGTGTGAAAGTGTAACTTAAATAATGATAATGAGAAAAACTGTTGTGTAGTTAGATAAAAATAATGAGTAATTTGGATGGCAGATATTTGTTTTGGAAGGAAGAAATAAGAAATAGAGTGAGTGGGTGGCTTATATGAGGGAAGGGGAAGGAGAAGGAGAAGTGGATAGCCTAATTTGAAAGGAAAGGCATGGAGGTGCTTAACGTTATTGTTTGGCAGCCTCTGTGCACCTTTCTGACTCCCACTAATCACCCACTTCTCATTCCACACCAATTCCCCAAACATTTTCCCTTCTTATCTTTCCGCGCTTCCTCTCCTTCGCGTTTTTCTTCTCCACCTGGTATTTTCATTTTCCTTTCCACAACTCCTCTTTTTTCTTTTTCCCTCTCTCATTTTCCTCTTCTTTAGTTTTCTTCGCCACACCAGACAACCAATTCACCATTGGGGAAGGAGAGGACACCGATGCAAGTGATTGGGCTCTACAAGGTACTTCATGCCTTTTTCTTCTTCTTCTTTTTTTTTTTTTTTTTTTTTTTAAATTTAATCTCCAAACTTCTTTTACTTCACGGTGCATTGTTGTTATAACAAACAATGTTGTATTTGCTAAATGTTTGTTCACTGCTTGCTTTTAGTTTCAGGAATAAAAACTAACTTGTTTTCACAATAAAAATATACAACACATTACTTCAAAATCAATTTTAACTAAAATCACACACTCACCCAAATACGCACTTAACATAAATGTTTTCGCCCATTCGTTGAGCATTGGATGTGACAGCATATTTGTTTCTGCTTCAGTGACCACTTTACACGCATTCCGTCAGAAGCTATAAACTATTGCTTTTGTGCAAATGAATAAATTTGACGTGGTTTCTTTACTGTATGTATATCCAAATACACACGCACTGTTTAATTGTTTATAGTAAGGCTAACATGCATGAAAGTCTCTCCAATTATTGGTCAAGCTCCTTGTATGGTATGTTCAATGAGTTATATAATTGAGTTTTCAACTGTAAAGTTGTTATAGTTGACTTGAAGGGGTTCCTTGAATTTTAGGTTTAATATGTCATCATAACCAGAACCCATGTCATTTGCTTAGCAGAAGTGGTATCAATTTTTTTTATATATTCAACTACTGGGAAGCCTTTTAAATTTTCATTAGAGGAATGGCAGTGGCAGAAACACAGAAAGGGTATGGGGCAGTCTCTGATTAATATTTGTTGCTCATTATTTTTAATTATTAAAAAACGATGCAATCTAACATATAGTTTGTAATTGAATAAGTAGATTTGTATATTATCCTGTGGACTTCTTTAGATTTAAGTCACTAGAACTTTCCTGTTTTCCTCTTGCCGTTCAAAGATCATATATAATAATATAATGTATCATAAAATAATGCATGAATGGGTTTAATCAGAGGAAAGTTGCTAAATCAAGTCTGGATTAGTTGTTATAATATAACTTGGTATTATTTTACAGATTTTTATTCCCTGAGGAGGGATGTCGAAATTATGTCACAGCGTGTTGAAGAGATTAGAGAATCTTCTGGTCTACAGCTATTGGAGCAAGAACTTGCCAATTTGGAGGAGCAAGCAGCTCATAGCTCCTTTTGGGACAACCGGGCCAAAGCTCAAGAGACTCTTTCGACATTGGCTGATGTCAAAGATAAGATAAAATTACTCAATGATTTCAAAACCCAGGTTAGGTTTACTTATATAGAAAATTATCGATTCTCAACTATTATTTTAAGAAGGATCAATGCAAAATAGTAATGAAGAATGGGGATTCTAAGTTTCAGTGTTCAATTTTTAATGCCTGACTGAAAGACCACTGGCCCTAGATATACTGACAATAAATACTGGAACATAAATTTGTAAAATTGAAATCTGGAACACGGCTGTTTCAACTGCCAAAAGTGCAATTTTATATGTACAAATAAAAAGTGCAATGTTATTGAGTTTGATATTTATAACAATTAAACACCCTTTTCTTTTTCTCTAAAATTGGTTTTAGATAACCAATTAAAATCAATTTACTTTTACATTTATGAAAACAAATATTCTCATACTTTTAAAAAATTTAAATGTTTGTACCTGCATTGTGAGTGCCTCTTCTAGTTTAAAAGGAAAAGGATTGATATTCTCCCATATTTTTGCTCCTTGTTTTGTAATCTAATTTTGTCTAATACCTTTATCTAAAAGAAAATTTCAAATTTTAAAAGTAATTTTGTTCACAGGTTTCTTTCAGAATGTTTGAAAACAAAAAATAAAAAATTTTACACCTAGCATTTGATTACGTGGGATTGGAATTGATGATCACCTGCAATTTTTTATTTAAAAAATACTATGGTATTTACCATTTTCAATTATTGATATGATGGTTGCAGCTCTAAATTTATTATAAAGAATATTAGATTAATTGTGTTGTATATTAGGTGTATGCGCCCAAATATTATGTTTACTATAATAGGGATATGAGTAGGCTACTAAGGCTACACTATGCTTTGCCTAAATAGGTGGAGGCCTATGTTTAAAACATTGGATTCAGCCTGGCTTGTTACTCATCTTAGGGGGGATTGGCTTGGGCTTTTATTGAAAATATAAAAGCTTGGCCTTGGCTGAAAGTGAATTCAGCAGAGGCCTGCAATAAGAAGTCCTTCAATCAGGCCAAGAAACTTTTAACATTTATTGTTCAAATTGTATAACCTTTAATAAAATTGTGATATTTTGTTCAATATCTGTACAAATGAAACAAAGGGAAAGTTGATGTTAAAGAAAATAAATACAAGGAACTAGCCCACCAGCAGATGGTGAAAAGGAAACCAACCCATCTGTAGATTTTTCTTTTAAGTTTTAAACATGGCAGAATTGAATTAATATTCATGATACGTGGTGTATGCCAGAACTTTCTCTTGCTCTTTAAGGACTCTTTGCTCACTTGTTGAGTGTCTCCAATTCTCGTATGCAAATTAAGCTATGTGCCAATGTGGATCTTCATCACAATAAATGTAGGTTGAGGATGCAGAAACAATAGTTAAGCTGACTGAGGAAATGGAATCCATTGACAGAGGGCTTTTTGAAGAGGCTGCCAATCTTATTAAAGAACTGAATAAATCAATAGATCGATATGAGCTGACTCAACTTCTCTCTGGTCCTTATGATAAAGAAGGTGCTGTTATCTCTATTACAGCAGGTGCTGGTGGTACTGATGCCCAGGTAAATAGCTATCTATTTACAAATGCTGTATATTGTAAGTGAAAACATTTTAGTCTTATATATTGTACTGTAGAAGGCCAGAACTTGAATGCCAAGACAAGCTAGAATTATCTTTTTCCTTGTCCTGCATTTATGACTTAAGACTTTAGAATACTATCTAGATGTCTCAACATTGTTAAACATTCTGGGCTCTTAGGAATTTTTATTCATCTCTACTAAACATTGATAATTGATAAATAACAGTCATATACAATCAAATTCAGAAAAACATTCTCCTAACATATGGGGTGTGAGTTTGTTAAGCATTTATGATTCTGCCATTTAGAAGGGGATTTGTCCTGTCTAGTGTGGGAAGATGCAATGTGTCCATCTTTCCAGTTGCTTTTTCAGTTTGTTATATTTTGAAATTTGGGTTCTTAATGGTGATTCTGAGTATGCAGCTGTATCGTCTGTATGAAAATTATAATCTCCAGTGCAGGATTGGGCAGACATGCTTCTTAGGATGTACATGAGATGGGGTGAGAAACAGAGATACAAGACTAGAGTGGTTGAGAAATCCCCTGGAGAAGAAGCTGGAATTAAATCTGCCACCATTGAAGTTGAGGGTCGTTATGCATATGGTTATTTGTCTGGGGAGAAAGGAACGCATCGAATTGTTCGTCAATCACCTTTTAATGCCAAAGGCCTTCGTCAGGTAATAACCAACTTTTTTGGGTAGCAGAATGTCAGATTGCAAGATCAGGCCCCAAACACTGAATTGAAAAGTTGTGTTTGGGAATAACAGTGATGCCTGTGTCCTCTCCTCCCTCTTTCCCCCACAAAAAATAAATAAAGATGTGCTTAGTCATTCTCGACAGATTTGCTGTTGAGTATTTGATGAATCGTTAATATTATTTCTCCCTTTAATTATCAAGTACTTAATCTTTTCTTTTAAACTCCAATTTCCCAATATTTATAAACAGACAAGCTTTTCTGGTGTTGAGGTCATGCCTCTTCTTCCAGATGAATCTATGGATGTCGAAATTCCTGAGGAAGACCTGGAAATTAGTTTTTCAAGAGCAGGTGGAAAGGGAGGTCAGAATGTGAACAAGGTTGAAACTGCAGTTCGGATCACCCACATTCCAACTGGTGTCACTGTTCGCTGCACAGGTTCTTTTCCCTCCTTTGACACTTATTTAATGCCACGAGTATATTTTTCTTAATTTGTCACATACCCTTTCTTTTTTTTGTGAGGGGGGGTATCTAATGGTTGTTGTGCAAAGCAACCATTGTGAATTGTTTGCATAGGCCAATATCAGGGACTTTTGTCACATTATGGAGACTTAAAGCAAATTATAAGAAAATGTCTTTTTTTATATTATATAATTATATATTAGGTCTTTTTATCAGGGCATGATGCCTTTTTCTTAACAAAAATTAATAATAAATAACTTTTTTAATGATGAACTTAAAACTTTAACTTTAGTGGGCTTATCCTTGGACCAGTCTTAGCCAATATGCAGGTTGGTGTACATAGTTTTAAATATAGCATAAATTCTAGGATAGTGATAACTCAAATATATTTGGAGACACCATACTCAAAAATAACTGTGTCACATCAACTACGATAGATCAAAAGTTTCTAAATATGCCATGGAGTGTTCCTCGTATGGGAATTGTTATCCTCACTCTAACTTTTTCAGTATGCCTAGAGTCTAGAAGTAGTACTCATTTAGGGAACTAATTTATAAGATCAACATTTATTTTGTTTGTAAGCTATTCATGACAACCTTCTGTTATTTGGAACTTTATATTATTTGAAAATTGAATTTGAAACTGTTTGAGGTGACTTTCTGAAATTTCAGTTGTGATTTACTTGATTTATTTGATAAAACGTTTTATCAACAATATTGTTTTGGACTTAAATAAGTTTTTTGTCCATAAAGTTTCACAAAAAATTTAATTTTGTCCTTAAAATTTAAAAATATTTTTTTTAGTTTCTAATTCACTTCTAGTCCTTCTTTTTCAGTTAACGTTGTTAAAATATTAGTGACAGAAAACACGTTTTTTGTACTCGTGAATCACTTTCTTTTTCAACCCTAGTCTCCTCAATCTTCAATTTCACATCCGGCATAGCCAACTACACTAGAACTTATCAATGAATAATGTTAATAAAAAATCAAATTAATTTAGGATTAAAAAAAATATTTTTGAATTTTAAGGACTAAAAATAACTTTTTATGAAACTTTAAGGACAAAAAACTTATATAAATCGTTTGTTTTGTGCATTGCACACATTTACCTGAATAAAATATTCGGTGAATGTTAGTTTATTTGGATTTTTGGTAAAGATGGATTTCAGGTTGATATTTGGCCTGGTCTGTTTATCTTTAGCTACATTAATATGTGGATCCGGGGACTACTTTTGCTTTTGTCAAAATTTGACAGCCACTTCTCTTGTGCTAATTATAGTCTGAATCCAATTCAAACATCTGTTTTTAATTCCAAGTTTAACTTTAAAAACCGTTGTGCAGAGGAGAGATCCCAATTGGCAAATAAGATCAGAGCTTTAAGCCGATTGAAAGCCAAGCTGTTGGTTATAGCTGAAGAGCAGCGCGCATCAGAAATTAAGCAGATTCGGGGGGACGCAGTCAAGGCTGAATGGGGGCAACAAATTCGGAACTATGTATTCCATCCATACAAACTAGTAAAAGATGTAAGAACAGGGCATGAAACGACTGATATCACCTCTGTTATGGATGGCGACTTGGATCCATTCATTAAATCTTACCTCAAACATAAATACAATATGTCACTGTCTACAAGTGGGGTTAACTAATTATGCTCGTGTGACTCCGCGTTCCACACATAAAACGCACATAACAGACACAGAAACCTGAAGTTACTAAACATTGCTTCTCCGATGACATGGGGATGGCGAGGTATCCCACGTGATGATATCAAACATGCACTGTATTTGATGTTATCCTGTGTACGGAAGGAGTTTGGATACCATTCCAATGTGAAATTAAGTAGACAAACCTGTCGTTTTGCAAATATTTTCCATTGATAATTTTATTCCTGCTTTTCAATGCATTAGTTATTGATGTTATCTTAACTGGGTGTTGTATATAATAGATAAATCATGCAGCTTAGGAACTGGAAGTATTAAGTTCAATGCAGTTTTCAATGACTTCTGCCTGCGATGTTAGGAAATTGAGCGTATAACCTGCGATTTTTACCGACCAAATCTCGTTAAATTTATGCAGTACCATTTTCAATCTTGAAATATACTGTACGTTTTATTATTTAATAATCACTAGTTTATTTACCGATTAATAGTTTATTTACCGATTAATTGTTCTGTAGTTTAGAAGTAACGTGGAATTTTGTGACATAGGGAGCCCATTCAAATTTTCTAAACCTTCGTTGTTCATTTGGGAATTCCATATAGTCAGTCAATTGTCAGAAAGGGTGTTATTCAGTTTGATAGAGAACCTCCAACCAAAAATATTTGATACAAATCTTTGGAAAACATGCAAAGATGAGCATCAAGTGGCTTTCTTTTTCCCAAGAAGTAAGCTCAAAGAATACGTGTTTCCTTTCTTTTCAGCAGCTTCTACGCGATTTTTGCCAACCTACGAGTCATATATATACAAGGTATCAATGTTAGACAGGTATTTTGATCAATGTCCAGTAGTACATAATAAACCAAAAAAGTCGTAAAACACTAACAAAATGCATATTATAGAAATGGAAAATACCTTGTCCATGAGCCAATAACCAACAGTTGGCATGTACTGAACGAGATACATCACAGCAAGCACAGGCTGCACGCAAAGAATTTAAGGACTAAAATTACAAGTTGAAAATTATAGTTCTTACTAATTGAAAGAATCATATACAGTATAAGGCGTGTGCAATACGCATGCAATCTTCTGGATCGTGAGTGAACACATATTCTTGTGGTTCCATAAAGTAAAGCAAGAACAAATATTCCCAGCATCTTACTCGAATTCCATAATGTTAAAAATTAACAAGTGACCATTATCTTCATGTTAATTACAGTCATACAGGGATTGCATGAACAGAGTAATACATTTAATGATACATTGTAAAGATAATGATTTATCTTGATGTACATTGGACATCCACTTGTCCAATAGGAAAGAAAGAAATATGTTATGGGCAGGTAACATAAAAAGGGAGCACATAAACCGTAGAGGAAATCAAAAGCAAAAGTATATAGCAGATTCACTGTATAATATAATAATTTTATTAGTCTCCACCCTCCTTGACTTACTCACCCCTCCCATCATATACACCATTGACTGTTAGTATACTTCAATTACAGAAATACAGACATACTCAAACAAAAGTAAATTGATAATATCAATGTTTTTACCTGATATGATATCCAAGCTTCCTTTAAGCCATGGGTTGCAGCTATAATAATCAGTTCTGCACACCTTTCAGATGATACACGCTTCTGCAGAGACAGAATTTTGCATGTAAGACAAACTTTCAATGATTCAAGTGACATATCCAGAACAACACCACATGGCACGAGTTCAAGTAGACAATAGTAACAAGTAAATCAAAACACAAAGGGAAGAGTGTACTGTATACTCCAAGATCTTACTCTATGCTGCTTCTCTGCAATATATATTTCATTTTCTTTTCAAAATAGCATTAGATATTTTAAATATTCTTAGTTCCAGTTTTATTTAGCAAACATGATATCAGCAAGCCATATTGATAGTTTTAAAATGACAATTCAATATGTACGTATATATATTAAAAGGAAAAATATGTAGTAAAATGGCACTCATCTACTTTGGCTAAAAAGTACAATAAAAACAATTTTCTTCATTCTTGCAAAGTATGTACTTATAAACTTTGAAAATGGTAACTTATCTTGATTTATCATTCTCAGAATTAGAAGTTTCTAAATATACCTGTATTATGGTGGGAAGAAAATAAAGAAAAATACACTCAAGTTTTGTCTTTCTTTATGGAAGTGATGGATGATGAGTTTGCAAATACACAAACCTCGGATGGAACCTTCGAACCAGCATTATTTGATGTTTCTATTGGACCAGGACAGACCACAGTTACCTGGATTCCTTTCAGACAGAGCTGCAACCAGTAAATGATTAATAGTGCATGATATTAGAATAAAACAGCATCCATTGTACCCATTTTTTCTTCTCATTGGAGGAAAACTACTGCATTTTTATCTTCCAGCCTACACTATAGTATGATTTATCATGGTAAATTGCATCCATTCTACTGAAGATAATATGCACAGTCTACTTACCTCTGAACGCAAGGTATGGAAGTAACCATTGAGTGCATATTTAGAAGCAGAGTATACTGCCTGACCAGGGGCAGGTGTCTTTCCTGCTGCACTACTCATCTGATAGTAAATTGAAGTACAAAAGATTGTCAATTTATGAAGAGCAAAGAATTTAAAAGCAATATTGAATAAGTTCTTCAAAATTGTGTGCATTAGTTATTAGCATACCCCGAAATTAATGCAATAACATAAAACTTGGCAATATAGTTTTACTAGAGTTATAACTATGACTGTCCATTCCATTCAAGGATAATATGTAATTGAAAACCTGACCAGGGACTACTCTGTTCTTTTTTGTTACGCTTGTTTTGGTTAGTGAACTAATGCAGCCAAAAGTCAAACATTAGCCGGCAAGCTCCACCTGCATGCTGTAGTTTCTAACCCTTATAATGTGTTTTGTTTGCAGTTGGTGCATTTTGGAGAGCACCCATATGTGAAAGGAAGAAATCCATTGTTCAACATGGAAATAAACGTGAAAACAAGCACAGCCTTAATATTCTATTGCCATTCAGATTCCATAACGAAAATAAGATATTTTCAAAGAATTCCTGCATACCACCACAAAATGACCATGCCCCTTCTTCAACATGAAAGGTGTCAAGAGCTTTGTCAGAGTTATTGTCCCGAGAACATTGACGTCAAATGTAGCCTAATCAAGAGATAAGAGTAATATAAAACTTCATATGACTACTTTTAATGTTTTGAAAGATGCCTAAAAGCGGGAAAAAGAACAATGTTAAAGTAAAGCTTTAAAGAGATACCTTAAGACCTTCCTCAGTTACATCTAAAATTGATGTTTTCTGCAAAACAAAATAATCAATTCATAATACCTATAGTTAAATTGGAATATAATATATAAAAACCCATTAAAAAGATAGGTGAAAAGAAATTTCATTAACTCTCAAGAAAGCATCATCACTGTATCATGGTCTAACATGAAGGGAGAGGGGGGAGGGAAGGAGAGGAGAGGTCACGGGTTTAATTCTCTTCCACAAACAAAAACTAACAATGAACATTTGTTGATAAAAAAAACTGTATCATACTGGCATGAAATGATAAGCAAGCATCCAATGGCATTTTCTCAATTGCTATGCTGGTGTTCAGTTAATAAAGATAGTTGCTACAACTACAAGTATGCTGACAATGACAAGCAATGAAAGGACACCAATCAGACTTATTGGTATCATATTTTATTTTAGAATTCTGCTGATGAAATTTTTCTAAACTCTGAAGTCATGCTGATATCTGGGAATTGAAATAAACAGACACAAACAAAACCATGTACAGACATTCTGCACCAGTGAATTAGTAACTGATAGTGTTGTCCGTAAATTTTATTTCCAAATTCAAGGAGGCAAGTCAACTTTTATTTCCTATTGTTTTACACTGATAAGTGTAGCTTCTAACATAACAAACATATAGAACTACTGTTTCCTGGTGTAATTTCAGATTTACTGAAAAAACATTAGATAATGCAACCAGTCACTTACAGGACGCTCAAAAGCTGCATTATGGATCATGTAATCAACACCGGAATCTGAAAAGAAGGATACTGCTTTTTCAACAGCCTTCCTAAGAGAATCCTCTCCAGACGATAAATCCAATGGTAAAATCTTGACTCCGTCGGGGGCATGCTTACCTGGTGGTAACCAAACCACATAGTAGTAGAGCATGGCATGTATCTATATCATTATTTGTACATATTAATAACAGGGTAATTTAGACCTCACATGTAGCTGCCAGTAATACAACATACCTTTTAGCTGTGCCCTTACTCGGTTTAGCTCCACTTCATTCCTTGCAGAGATTATAAGCTTGGCTCCTAAGCTTGCAAGTTGTTTAGCCAGAATCTCCCCTTCATATACATCATTGAAGAAGAAAAAAAGAAAAAAGGAATCAGTTATGCAAGCAAAATTAGATTCTGGTTGCTCAAAGAAACCGTGAAATAGTAAAATAAAATACTTAATTGAATGCAGATTAAGTAGATGAAGCTCCATGTTCAATAGAGAATTGAATGCACTAAATGTCCTTAGTTAAATTCATCAGAGGTAAATTACTTTCGGTCCTTCACTTATTAAATTGACTTCTGGATGAATTAGAATTGAGAATGAATTTGATGTAAGTCCAATGTTAACATGAATGAATGAATCCTATAGATTTAGAAGATTGATAAAAGAAAATGGTAAGAGTTATTGTTATACCAATTCCACGGCTAGCACCGGTAATCCAAACAACCTGAGAGGAAATGAAAGAGAAAGAGAGAAAAGTCATTTATGTAAGAGACGAGGAATGAAGAACTCAAGTGCGTGTATCTCATTCGTTCCGGTAACCTTATCTTCAATTGCTTGGCGTTTAGGTTGCTTCTTACACATCAAAGTGAAATCGCCTAATGAATAAAAAACAAGAGAATTCGAATCGAGAATTGAAAATAAAAAGGATAAATGAAGAGGGATAATAATAAAAATACCATAAGCAGTGACGAATTTGTATAAAAAGATGAAGAAAAGGAAAACACAAATGAAGAAGAGCAACATGGGGCCGGGCCTGAAACTGTGCAGTTATTTTGGTGTTCGTTGGTGCTGCCGTCAAATGCCTTAGCCAAACGGAAAAGGCTATACCAGTTACTTAGCTACTGTCCAAAGCTGATTATCTCGGATAGATTAAACTATTAAGTAGTAATTTATGCATTTTACTGTAATATTTTTAAACACGTCAAACGGATAGTAACTGACAAAGGATTTATATATATAAATTAGGAAATAATACTTTCTTAACAAAAGAACTTATTTTAGTAGGTAAAATCAAAGCAAAAAAAATAGGAATTATATACTATCATTACAAAATAATTTATATTATCAACCATTTTATGATGTATGAGATAGTTTTTAATTAAATAATACTGTTTTTATTTTTATTATAAATATTTTTGACATAATTTATACATACTAATAAATGAGTTAGTTAAGTTGATTTGATTGATTTTTTTAGTACCAGTTTTATATTTACTAGTATTCATTAATTTATTATAAGTGATGTAAAAAATATTAAAGTATAAGAATATTATATACTAGTATGGATACAAAATAGAAATAATTAATAAAAATTAAATAATGCATAAAAATTAAAAAATACCTTTTAAGTAAAAAAAAAAAATCAAAAGAGCAGAGAAGAGGGATTAGTATTAAAAAAGGGTTATAGTAATATTTAAAAGAATGTTAATTTAGGAAGAAATAGTGTCTCTTAAAAAAGAAAGGAATAAATAAATAGTTTGGAATGGGTTGGGCCTAAGAGTGAAGCCCATAAAGTGAAGAAGAAGAGAAAACAGGGTTAGCTTTATTTATCCATCGAAGTTGTAACAAACAGAGTGGGAGAAGACGAGAGAGGAGAGAGTAGAGAGTAGAGAGAGAGAGTAGAGAGAGAGGTTAAGGTTGGTTTGGGATCGATGGCGGCGAGTAGAAGCGGCTTACCTTTGATGAAATACTTGAGAGTGCGTGTGGACGCTCTTCCCCGTAACACTTCCTTAACCCTCGCTCCCAACTTATTCATTCGCCGTTTCTGCGAAGAGGTTCGAGGCTGCTTTCTCGACAAGTCTGAGGTCACAGATCGCGTCATTTCCTGCGTCAAAAACTTCCAGAAAGTTGACCCCTCCAAGGTTCTATTCTACTTCCTCTTTTCCATTTCCATCCTTTCTCTTTCCTCTCGTATCTTCAATTTCCCACTAACCCTCACGTCATTCATAGTGTTATAATAAAAAACGGTCTGCGATTGCCATTTCTGCTGTAACGTCCATTATTTAACCGCACCGCTTGCATTTCTCTGCAATTTCCCACTAATTTAATCGTAATCTCCTCCGCAACGTCAATGGTCTTGGAGTGTCTTCTGACCGTCTCTATGCTTAACATGACTTAGTAAATTAAAAGTACACTGCAATATTTCAAAGATAAAATTGATGCTGCTAGGTTTATGTTTTTGACTGTTTAATCCATGGAATCTGTTATCCAATTAGTGAAACTTTTGACTGTTATATTTGGCTTCTTTTTTTTTTCTTTTCCCTTTAGTTTTGAAGCTTTATATTTCTATTGTATATTTATGTGATTTTGAGTGTTTGTATTTGTCAGGTTATCCCTAGTCCTCATTTCCATTTCTATTTTCAAAATCCCGTAAATGATTAAACACATGCGTCTATTAGGTTTTCTATTAGGCCTTGTTTCTCAATCTTGTTTTATTTCAATTCACTGTTCAATCCATGGACTCTTTTATCCAATGCAGGGAACTTATCTTTATTTGATTTTGTTTCGTTAATTTGAAAATTTCTGCTTCTAATGTTTCTCGAAGTGATTCCCAAACTTTGTATTTTTCAGGTTACCCCTAATGCTCACTTCCAGAATGACCTTGGATTGGATAGTTTAGATGCAGTGGAGATCGTGATGGCTCTTGAGGAAGAGTTTGGGTTTGAGATTCCGGATAATGAAGCTGACAAAATCAACTCCATTAAACTTGCAGTGGACTTCATTTCATCTCATCCTCAGGCAAAGTAGCGTGTATAATTTTTCTTTTGTTTCTCATAATTTTTAGTTTAGATGATCCATCAGTCATATTGGCTTCCAAAGTGGAACTTTATTTTATCATCCCTCAGAAGAGTGTTAGCTGGGGATGTGCCAGCTTCCTTTGGTGGTATTGGCATCACAGAACTTGTTTCCTCCGGTATTCGTGTCAATAAGAATTGTGTGTTAAAATTTCTTATTATGAAATTGTGAGGTGCGTTGTCCTCAGCTTTCCCTTTGCTTTATTTTATGTTATGCATCATAATAGTTTAGCTCATGTTAGGTCTCCATGCATCATTTGATGTTATGTTTATATTTTGCTAGATGCTTCTTATGAAATTACTTGTTTAATTTCCGTTTTTAGGAAAGATCTATCTAGCTCCAAGTGATTTTGTTTTGACTTATTATATGGTGTGTTGGTGAATAAAAAATTGAATTTTGGGGATGTAACATTGCACCAAGAGTTTCAACCATGCATATCAAATTTGCGAGTTAGCTCATTCATTAATCATTAGTACTAGTTTACAATTTTAGACAGAAAAGAAGTTAAATTGCTTCAAAATGCATTGCTTCACAGGCTCGGGTACAATTTTATCTTGCCCAAAAATGAGTCCGAGTGCGTGAGTCGAATTTGACCTTTGATGTTGTGGCGAAGGATGCGCTATCACCGTGTCCATCCGGGATCAGGATTTCTTTAACATTTAATGAATGTTGATTTCTTGAATGTTAGCAATTGATATAAAAGATTCCTGTATGATGGCTAATTATTAGAATGCTTGCACGGTGGTAATGAAACAAGCCAAATTGAAAATAGTTTGAAATGAGCTGAACTAGAGTGGCATATAATTCGATATATATAAAGCTTATCAAGTGAGAAAAAAGTTTATGATAAGAGATTAGAAGAATAGATAATAAGTAATAACAATAAAAATTAAAACAATTCACTTAAAGATATTATGTCCTTTATTGTCTAAAAGATATTGTATCCATTGTATCATAGACTTGGATGCAATTTTATCTTGTCTAAAAGATAAGTTTGAGTGCGTGAGTCCAAAAGAAATTAATATTGATGAATATTAATTTCTTGAATGTTAGCGATATATATATATATATATATATATATATATATATATAAAGAAGTTTATCAAGTGAGAAAAAAGTTTATAATAAGAGATAAGAATAATAACTCAAATTAAAATAACCTACTTAAAGGATATTATGTACCTCCTTTACTGTAACTCACCCTATCCTCAACATATTTTTACTTTCACTGTTGTTACTACTACCATCATTGTTGCCTGTTGTTGTTTACGATCACCATTACTACACCACCCCATTGTTGTTGCCTCCACCACCATTGACGATGGTGGTGGTGGTAACGGTGGCATGTTGGTGGTGATCAATGGTGGCAGTGGTGATTGTTGGCAGTGATGGCAGCGATAAAGGTGATGTTTGAGGGTAGAAGTGAGGGTGAGTTACGTTAAAGAAGGTACATGATATCTTTCAGTGAATTATTTTAATTTAAGTTGTTATTTTTAATCTTACACTTATTATCTATTCCTCTCATTTTTTGTAATAAACTTTTTTCTCACTTGATACTTTCTTATATATATACATGACTTTTGGTCCAAAGACACTCCTAGTTTAGCAAAGCCATCAACTAAGGTTTTCCTCCTAAGGTGCATAGATAAAGTTGAAACCTAACTTTTTTCCACTGAGAATGTGGTCTAATATGGGGAAGAACACATTGTTGATGGTACATCCTTTATCTAACAATTTAATGTTGTTGAGGGAATCAGATTCAATAACTAGACTATGGAAATTGTGATTGTATGCCACTGTGAGAGCATGAACAGTAGCCATGAGCTCAACTTTATAATGTCACAAAAGGGAATCTTATGAGAGAATCCCAAGAGAAAGTGTCTTTTATAGGCATGGACAACACCAACAACAATTTCTTTCCAGCATGAACTAAGAACAATTGCGTCACAATTTATTTTTACGGTGCCTAAACATAGGGGTTGCCAAGCACAATGTCTCTTGAGTTCAACATACTGAGCTCTGTTGTTCTTTAGAAGCAAACACATTTGATGCACCTACTTGATGTTAGTAATCATGGTCTTGACAGAGTTCATAACTTGGTCATCATATTTCCATCTGCGTTGGAATATGAACTCATTTTTTCTCTACCATAGTCGTTCTAGTACCACACCAAATATTTGACACCACCAAGAGTCTCAATGAATGTAGGTGGATTGAAAGATTTGCCAACAACTACATCTTATAGTTAGGTTGACTAGTAAAATCTAATATGTTAGATGTACGAAACTTTCTCCATACTAAATTGGTGTGATAGAAGTCCCAAAGAGCATGCATTATGGTCTATCGGTGCTGGCCACAAAGAGGACAAGTAGGAGTCGAGGCTATATGCTTGTTGGTCCCCCAGGTTATTAATGAGGAGAATTTCATTTGCCACCTTCCAAAGAAATGTGCGAATACGCTCCTGACCATCCCATTTCCACAACCTTTGAAATATGAGACTATGAGTTGTTGCGTTTTGGGGAAGAAGACTTTCATAGGTGGATTTGGTTGAAAAGGTACCATTTGCTTCTCTTGCCTAACGGGGGAAATCTTCCAGCAGATTACCTCTAGGGTTTGCAATATCACATATCTCCCTTATTACATAAGTTGGCAAGACTATTGTAAGTTAATTCACATCCCAAGAATCATCTAAAGTCATAATGGAGCAAAGTTTATTATATCATGCATGTGATTTAATTACATTGTCTTTGTATTTTTCTAATTTTTAACATTTTCTTGGTTTTAAAATAATGACATTGTGTTCTTAATTTTTAAAAGTTTTAAAGTGATTTAAATAATAAAAAAATAATTATAATTAATTTAATCATTTTTAACTAACAGAACATAATCAATGTTAATATAATAACAATCGTGCATAAATTTCACAATTTTAAAAATTTTAAGGGATATAATGTTACAATTAAAAATAAAGGATAAAATGGTAAAAAAAAAAACAAAAACCAGATGATACAAAGTAGGCTATTAATTAAAAAATAAAAGGACACAGAGTAGGCTATATATAAATTCCTATCTAATTCAGAGACAGAAAGGAGTAGAGGGAGAAGGAGAGAGAGAAGAAGAGGGAGACAGAAAGTAACTTTAACTTTTTATGAACTTTCAAGAATGGTCCAGTAAGAAGGAGTGAGTGCACAACACAGAACATAAGTGAATTGAATTGCTAAAGGGTCACCTACGCGGATGAACCAAATTTTCAATGGAGATGAAAATTTTACTAGTAAACCCTTGCTAGGCCACATGGGTTCTTGCACAACAGTTATGGGGAAATTTTTGTTTTCAGATTGGAAGCTCCTATTCTGCTGTTGGGTCTGCACATTGGTAATAGAAAACATGAGTCACCTTTCTGAAGCACATCACGAGTTATAGGACAGTGGCGGAGCTTGACTAAAAAATAAGGGGGAGTCAAATAAATTTTAATATATAAATTAAATATATAATTTTATATTATATAAAATTTAAATTATTGTAAATATAAAAAATCTTACAAGGTATCAAAACAAAAAGCACAATAACAACACAAACCTTACATAACTAAATACAATATATATAATTGATTAGTAGATGATTTGTATCATACCTCTTGAAGCTTTCTCAAGTTATTGTAATTCATCATGTGTATCTTTAAACATACCAAAATGCACTTACCACATTAGCAGATATATCCACTATGATAATATCATAAAAACATAGATAAAAAATTTGAGACACATTATGATATCAAACAAAATTGAGTAAACAATATAAAATTACCTTAAAGTGCAGCTTTGCACTCTGAGTGACTTGAAATTATCAATGATTAAATTAAAAGTAAAAGTTAAAGCAATCTCTCTTCCAATGTAAATGATCATGCTATTGGGTAAAAACTCAGTATTCATCTTATTTCTCAACCCATTCTTAATTATTTTCATTACTAAAAAGGATCTTTCAGTTGTAGTTTTAAAAACTAGAAGAATCATGACAAGATGAAGTAATCTATTAAACAAGTAACAAACTTTTGACTTTTTTATTGGAGCCAAGCATGCACACAAATATTGAATGGATGATAAATTCATCAAATTTGATTCTGGACAGACATAAATAATGAAATGTTGAAGTTGAAATTTTAAATCAATATTTTCCTGCTCACTAAAATCTATGGAATAATATTTTTCTACAACATGGAATAATGCTCTATTGGGATGTGTTCTTTTTGGTGACGAGAGTGTCATTGACTATCAAATTGAGGAACTTCAATATCATGTTTTCCACAAAAAGATATCACATCTTTTAACAACTTATGCCAACAATTTTTTCTCAAACTTTGAATAAAATATTTTTTGTAGGGCAAACTAAATGTATGATGTTAACTACATCTTGAAATTGTTATTGTGAAGCTTGACAAAGAACATTTGTTATCCCTATCATCTTTCTCATCAAATGTAAAATCAATACAAATTCAAATTAGGTCAGATTATTATAAGCATTATTAGCATCCCCACGTTGAGAATAGGTTGACCCATCAATAATAATTTTTGAAAAACAGAACAAGTTACATCATACATATTTATCAAGCTACAAATAGAAGAGAAATGTGATCCACAATAACTATCCTCAACTTGTTTCAATGTACCAATTTGATTTGCTCCTTTATTAGTTTCAAGCTCATAAATTTTTAATAGATATGAAATTTCATCTAACTTGGCTGCTTACAACTCATCATGACGCTTAATGGAAGAACAAACAATGTTAGTAACAAAAGTCAATTTTAAAAAGAATTTGATGAATTGGAATGACTTCTTTGGATATAGCAATTAAGGCAAGTTGTAAATGATGAGCAAAATAATGAATGTAATATGCATAAGGACAATCATTAAAAAATAATGCTTGTAAATCATTCCATTCTTCTCTAATATTGTTAGCGCAATTATACCCTTGACTGCGAATGTTAGAAACCTCTAGATTATGTCAGGAAAGTAAAGTGCACAATTCTTCCTTACGAGTTAATGCAATTGTGTCTTTAACATGCACAATATTAAAAAACTGCACTTGTATGAAGCCATTCTTATCAACAAATCTTATAACATGAGCTTCATAAACAATTGTCCAAAATTTAGAATCACTAATCCTCATGGATATGATTCCTCACCTTGTTAGAAAGAATATGCTAGATCTCTTTTTAAATTTGATGTGAAGTATATCTAAATTATATAGAGCATTCTCTAGCATAACTTTTACAATTTCATCATTTTATGATGCCTAAAGTTTACATTTCAAGAAAATTGCCTCGATTTCTTGATTCACTAGTTTCAGCATGGCCCCTAAAAGCACAAGCTTGAAATGTTAAATAACAAATAATATCAATTTAAGTTTAGAGACGTAGTCGATTCTTTATAATTTGATATGAGCTTTGCACATGAATAAGATTCTGAATATGGCCATTTGATTCAACAAATCTTGACAAGTTTTCACTGCATTGTTGTGTGGTGAACAAGAATAATTTCTTATATGTTTAAGAAAAATACATTTCTTTTCATTATTAACTTCTCTCCAATTTCTAAAACCTGTAGCAATGAAAACATCTGATATAGGACATCAACTAAGACTTTTGCTAAAAAGATAACAAGGTAAACAATATGCAACATATTCTGAAAGAGAATACTCAAGCCAGGAAGGAAATATACTAAACTAATTAAATTGAAACTATCTTGGATGATCATCTTTACCAAACAAAGGATGTTGATCTAAACGTATTTGATATGGACCATATTTTAAATAAGCCCTTCAAATTTTATTAACTTTATTTGGTGGATATTGCCAAATTTAAATGTGCTTGCCTGGATCTCGTTCTAAAGAATTCTAAAATTTATCATATGTTACTCTAGAAACCTTGGAAAGTTGCTTCTCAAAACAATTTTCAACCTCAAATGACGTGGAAGAAGTATTTTTTCCATCTTTCTCAGAGGTTTCTCTCTTGAAAATAGAATTAATTCTTATATTATTCATTAATCTAATATCTACATAAGTGTCATACACATAAACGTTATTAAGGATTTTAAATATCTTTCACAAAAAACACCACCAAATAAATAGTAGTTAATTCCAATTGTCAATTTTTTTTTCAAAGGCAAATAAACTTTTTTCCTATTCAAATACAAAGTTTGGTCGAGAAAAAAAATGTTATCACCTTCTAAGTTCCAATTCTTGATAGATTGTTGCTTCCTTGGTTTCAATAAAATTAAATATAACTTAGGAACATATATATATATATATATATATATATATATATATATATATATATATATATATATATATATATATATATATATATATATATATATATATATATATATATATATATATATATGAGAATGATAATAAAAGGACGAGAAATTGAATTTAGCAAAAAACAAAGAAAAGAATTTAATGTTATTAAACTACTCACTAGCATTACATGTTTGTACTTATAGTCATACATGTTACAAACTTACAATGTCAAATGTGGTAAATAAAAATAATTTAAAATTCTATTATATTATCAGAAAAATGGTGAAAAAAAGTGGCAAACTTACAATGTTAAATGTATTTCATGTGTTGTGCTTGTGCAGATTACAGTTGATGCATAGTCGGAGACATGGTGCAACATGCAGTGGTGAATCGCAAGAGCCAAGAAGTTTAGATGAGAAAGATTCGGAGAGTATAAAAATAAGGAAAATGAAAACAAAGAGTTTATTAGGTGCAATGCGTGTGTGTCTTCTCTCTCGATCTCGATAAAACAAAACTTTGGATGTAAGTTTATAAAAGAAAACATCTCTAACATGTTAATAATATAATATAATAACTAAAAATCTTATTAATATTTATTATATGAATACATATATATATATATATATATATATATATATATATATGTATAAATTATTTTAAAAAGCTTAGGGGGCAACAACTCTCCAACTCATAGCTCCACCTCTATTGCAGGAGACGAGAGAGGGCAATTGTGTTTTTGTGAGAAATTTCGTATAAGAAGACCACATGAACTTGTTTAATGAAAAGCTCAATCTGAATCGTTTATTGAAATTGTATAGTTATTATTAAGTTTGCTCATTTCTCATCATAATCATTTTTCTCACACGAGTTATCTTTATATACATAATTTTTTATTTAATTTCAACTTATTAAAAATAAAATGTATACTGGAGGACCCTCCGCGACCGGACCTCCCCAAATCCAAAATGCACTGTCGAGATCAGAAAGACCCCTTAGTAAGTCATGTTATAACGTCTCTGTCACCTAGCTCCTTAACACTGGTGGGATTATGTATGAGAAGACCCCTCGGAACTGGACCTCCCAAGATCCAAAATGCATTGTCAGCACTAGACAAGCCCCTTAGTAAATCCAGTTATAACTTCGTCGCCTCACTCCTCGACATTGGTGGGGTTGTATGTCGGAGGACTCTCCGGGGCCAGACATCCCTAAATCTAATATGCACTACCAGGGCTGGATATGTCCTTGGGTAAATCATGCTTACTAAAGACAGATCCAAACATAGGTTGACACATGAAAAAAAAAGAGACTTTTTGCGTGAAAGGATCCCTTTGTCCTTAATAGGTTAGGAAGAAACCCTACCTTCTTGTTGACGCACATTATTATATATTACTTTTGTTGTTGACGCACTGTACTTTTGTCAATATCTTCGTCAACTCATCTCTGATTTGAGTGTTGGAGTGTTTTTGCACATACACACTTGTGCGAGTTCAAAAATCTATTGTTTGGAAACTCGAAATACTAAAAAGGAGGTAAACCTCACACGTGCGTGCAAGACCATAATTATAATTAAAAATTAATAATAATATAAGAAATTTTTTTTTTGATAGTTAGCTCATCAGGTTTGATTCATTAATCATGTGAGTTAAAAATTAAGCTCTTTAAATAAAAGAGTTGAACAACAAAGTTCTATGACTATTTTCCGCTCTACTTGTACCATTTACAACATAAAATTTGTTACAAGGCATTTCTCAAAAGCCACCAACATTACTTTGTCCCTTTTTTTAATATTAAAATGTATATTTTTCTCGCAAACGTGATTCCTGCATATTATAGTATTTTAATTTTAAATTATTTGTTGAAGTTTTTTTAGTTTCTTTAACATAAAGATTATTATCAAAATATTATTTACATGATTATTATATAAGAGGTGTGACTATTACATTGTCCTCTTTTCATATATTAACATGTGCATTTTTTAAGATGTTAATGTAGCATTTTTATTTTTAAAATAATTTTATAGTTAAAATATTTTAAAATATTATATTATCTTTTTTTATTTCACATGTGTGAAATAGAGAAGAGATTTGTGTACTCTACGGGTAAAAAACTCATTCTTCATCTTTTACCGTTAATTTAAGATTAATTTTTTATTATAATTATTAGATTTTAAAAAAACTAATGGAAAAAACAAAGAGTAAATCCCAATACTTATTATTCATGTCATATGTTTCATATCAACAAATGTTTATGGTGTCACATTAATATATTATCACTTTATTATTAAATACAAAATATTTTATTAGCACAATCTGAAAAAAAAAAAATAGACTATATGAGGAGAAAATTAAAATTTGTAGGTACAAACATATATTAAAGAGAAAAATACTTATTCACAGTTAAATGTAAAATGTTTTATATTTATAGTTAATCACAATCCTTTTATATGACAAATTTGTTGAATTTACCAATTAATAATTTAAAAATCATATAAATGATGAGTTTTAATTGAACGTCAGTTTTAAAACTTTTTTACACTGAATAGATAGGTGTTTAACTCATATTTAAATACTAAATAATTAGGTTTAATTATCATACATTAAGATAAAAAATAATCATATAGTTGCTAATCATCATTATCATTGTGGGTGGTATGAGTTTGAAGGTAGTTAAAAGTCTACAAACATAATTAGAGTCATGTGATTGATAAAATTATTTTACATCATTAATACATAACTTTTTTTTTCTGAATATAATATATAAATTTAATTTATAATTAATAGAAATAAAAATAAGAAGAACTTACTAAAATATATAGAATCATAGGATTTAATTATTGAGTATTACTGCTTTTAAAATTGAGTTGGTCATTAAAATTGTTTATATTAAACTTAGTTAAATTCACACAAACCTTAAACCTTGAATTTGGTGTTCACTTAGCTTCTAATAATCTTCTTATTAATTGATTGCAAATTTGCAATTGGTCCAATAGTTTTTCTCACTGATTTAAAAATCGGATGAAACTAGTATGTTCGACCGAAAAACCAGTAAATCAGTTTGGTAACCGATTTAGTCAATGTTAAAGACTGGTTAGCAAAAAAATGGTATGAAAACTAAAAAAATGGTCAAAAACTTGTAAAACCAGTGGTTTAACTGGTTCATTTTTTTTTTAAAATTTTTAGATTTTGCAAAATATACTGCTTGTTTTTCGAAGTTCATCCATTTTTAATTTAAAAATTAATGAAAATAGGAGGTTAACTTACCAATATGAAGGTGTATTTAATAAAACTACTTTTTCTTTTATAATTACCTCCTTAATATATTTTTTCTGTCAT

**>qantho5.1** (**1,99,399 bp; CHR 7, 37523869-37324470)**

TCGATGATGTGTCTTCGGTGATTTCAATTGTGTGAGGAAATCGAAAGAAAGGCAAAGAGTTAACAGCGAGTAGTATGGTTGAAGAGAAACCATGGAATTTAATGAATTCATTCAAAAGATGGGATTGATAGATATACCGCTGCTTGGAAAAATATTTTCATGGTTCAGACCTAATGGGACAACAAAGAGTTGGCTAGTTAGATTCCTTAGTCTCTCAAGATTGGATGTGTGCACATTATGTCATGAATAGGAACTTTTCCGTCCATTGTCCAGTAGTTCTGAAAAATAAAGATATCAATTGGGGCCCAAAAGCATTCAAGGTGATGGATTGCTAGTTTCAACACAAGGAATTCAACAATGTCATTTCTTATGCTTAGAGTTCCTTACTGGTTCAAGGATCAAAGTTATATATCTTAAAGGAAAAGTTGAACAGATTAAAAAAAATACTCAAAGTTTGGGGAAAAAGCCAGTTTAGGGACATTAAATCTAACCTATAGCAAACAAAAATATCCCTGAACAAGCTAGAGAAGAAGAGTGAAACAAGTTCGTTGATTGAGATAGAGCAGGAGATCAAGAAACAACTTCAACAGAAATTGTGGGAGCTGGCTATTAGGAACAAATCGCTACTGCGACAAAAATCAAGAATTAGGTGGTCTCTGAAGGAAACAATAGCACAAAATTCTTCTGCAAAATTGTTAACTAGAATAGGCACAAAAATTCTATCAAAAGAGTTTTCATAGGAAGGGTATGGAACAAGGAACCAATAATAGTAAAAGAAGAGGTAAAGTTGTTCTTTGAAAATAGATTCTTAGAAGCCTTTTTCCTTAGACCTCGTCTTGATGGAGTTACGTTTTGGACAATTTATGATCAACAAAATGTTGACTCGTGTGCACCATTCGGGAGGTTAAAGTAAAGGAAGCAATATAGAGCTGTGGTAATGATAAAAGCCCCGGTCCGAACGGTTACAATTTTAATTTCATTAAGAAGTTTCGGGAAGTGATCAAGTTTAACATAATGTAATTCATACATGACTTCCATTCATCTGGAAAGGTGGTGTCAGGGTGTAATTTTTCCTTCATAGCTCTAGTTCCAAAGATTACTAACCCCCATTATCTGAATGAGTATTGTTTGATATCTCTTATTGGATGTATGTTTAAAATAATTTCCAAACTTTTGGCAAAGAGATTGGGGAAAGTTGTGAATCATTGATCACTCTCAAAGTGTCTTCATACCAGGAAGACACCTACTTTATGGCACTCTGGTACTGAATGAAGTTCTAGGTGAGGCAAAACGTAGAAAAAGAAGGCACTTCACGTTCAAACTTGACTTTGAGAAGGCATACAACTCAGTATCATGTGACTTCCTTTAGTATATGATTCTAAGAATGGGATTTAATCAAAAGTGGATCTCTTGGATATTAGTTGGCCTCACTTCCACTAGGGCGTCAATTTTGGTTAACGGATCACCATTAGCTAAATTTTCGCCTTCAAAGGGTTTAAGGTAGGGGAACCTTTTGGCCTCTCTACTATTCACTATAGTGGCAGAGGGTATAGAAGGGTTGATGAGGCAGGCAGTGCAAAAAGACCTGTTCACACCATTCCTTGTTGGAAAGAAAAAAATTTCAGTCTCCATTCTCCAATATGCAAATGACACAATATTCATTGAAGAATTGTCCCATCAAAATAATTTAGTCACTAAAGCCATTTTGAGATGGTTTGAACTAGTTTTTGGCCTCAAGATTAACTACTTCAAAAGTAGCTTTGGAGGGATATGTATATCTACCTCGGAGATCCAAACTTTTGCACAAATGTTTAACTGTAAAATTCTCAAATTTCTCTTTAATTATCTAAGCATCCCGATAGGGGCAAAACCTAGAAAAGTGGCCACTTAGGAACCTATCATCAAGAAGTTGAAGTCAAAATTATCAAGTTGGAAGCATAAGCACCCTAAAAACGAGTTTACCTCACAATGGGGTCAACTAGGAAAGATAAAGGAAAAAGATAGAAAAAAAAATGAATAAACAATAAATAGAAGAGTTATAATATTAAATTGGTGTTTATTGGGGGAAAAAAATAGAATTGATGAGAGAAGAAAGAACAGGTGCATCTAAATTCCTTTTATTAATTCTAATAAATATTGACGATTAATATTTGACTAATAAAAAATAAAGAAAGAAATTTTTTTTCTTAAAACCTAACCAAAGAATTAGTCACAAAAAGATCATATCATTTCCCATTTTCAATAACACAAAAAAAAGAAGAGAGAACCACGTAAAAGAGAAGAGAAAGATTTTATAGGAAAAAGTTCAATTAATTAGAAACGATCGTATTATTTCAGGCAACATAGATTAAATAATTATAATTATAGAAAAAGTTTACGGTGTCTTTTCATCTTAATGGATATCAATACTTTTTTTAATAAATTAATAAATAATAAATATGTGTATATGTAATTTTCATTTTGTAAAAAATATAAAATATGTACCCTGGTTGTTGCTAAGGATTTATTATTTTTTTTATCACCGAATGACTTTTAAATTTATTTTTATTTACGCTATATATTTTCATGTTTAATGTTTTAAAACAATATATAAATTCCAATGATTTTTTCGTGTGTTCAAATCTACAATAATGCTTAACAAAATAGATGTTTAAAATAAAATGATATAGTTTATTCAAAAATTCTCTAATTGATACAACTCAAAAAGATGGTAGAATAATATTTGTGTACATCGTGCTTGCTTTGGTCACTTCTTTGTACCTTTACCCATACCAATACCATTATAGGTATTGTTGTGAGGAAGAGAATTAATTAAGGGGAAATAATAGTAACTAACAAGGTTGACCCACTCTACACCTAAGGCTTCCAGAATAACGTGTAAGCCTTCCCACATAACTCGCTGGCTTTGCTGAGATCATGTCTTGCCTTGAGAATGGCCTGTTAGCAAGTTGAGGGCCAGATTCCACAAAAAACGCACCATTCAAGTACTCATCATTGATTGATCTCCACTGCCAACTTTTCCACACACTCTCTTCCGTGTATTCTCTCTTTGTGATCTTCACCAACACCAAAGTATAACAAATTAAATCTCAACATCATATGAAAGTTGCATGATAATATAATAGGAATATCACGTAATAATAACATTATTAGCAACCCAGTGATTTTAGACAAATTAAGAAGACGTGGAGATGGATATATATAGACATACCTCTTTAGAGAATCGGAGGTTAGGGCCAGTGAATCGATTACCCTCACTAATAATAGTGGGGTTCTGGCTACCACCAATAGCATACATTTCCCAATGAGTGTAGTCATTGTTAACAGAATGGACAAAACCATATCTTACTCTGGGCATCCTTTGAATACATCTCTTTCCAAAGTGGTTGAACGCTAGAGTGATTTGCATGATTTTATCTTGATAGTAACTGTCCCAGGCACCAAACAACATCACCTGCACCATGCAACCCAACACTAAAACCACCATAAAGGGTGTTTTTATTTTAATTCATTTGGTTCCCTTTGGTTGGACAAGTTATATATATAGTTCAACATCATGTGCATAAATGAAAAATGGAAATGAATTAATTACCTCATTGTGATCAGTGAAATGGCTGTTGGAAATAGTAACAGCAGTGGAACCCATGATGACATCAATGAGTCCATCTGAGCAGTTTCTCATGGAAACATGATCAATCCAAAGATTGCTAGCACCAAAGACGGAAATGCCATCACCATCACTCCTAGTCCTAAAACCATAATGTCCCTCAGAGTCTCTAATCATTCCACCTTCACCAGGCTAAATGTCGAGAAGTTATAAAGTTAGTCTAATATATAACAAAATTTAACCCTAACCAACTAAACTAAAGTTAGGAGTAAAATCAAAATTTTAAAGAGTTAAGGAAGTAGAAATTTAGTTAGAGAAATGAACCAGGATGTCGTAGATCTTAAGTCCATGGATGATGATGTTCTGGACATATTGCACCGTTATGCCAGCACCACCAGTGATGTAAACCTCAACACCTCTTCCATCAATGGTTTTGTTGCTGTTCATGATGAGCTCTTGTTGGAGAGTGATGATCATGCTACGAGCGAAGATGATCCACAATGGACCATTACGTGTGACAGCATGACGAAGAGTGCCGGGCTTAGGGTTTACAAGATCACCATCAGAGGGATCTGTGACCACATAATATGGACCACCTTTTCCTCCAACGGTGTTCCTGCCAAAGCCCTGGACACAATCTGCCAGCTTCTGGCGGTTGTTGGCCCAGTTAGGGTCACACCTCCAACACCTATCAATGGGGTTAGTGGCCATGCATGGACCTTTGTCTCTTCTTCCTTTTAAGTTCCTTCGTGTAGTTTTTCCCCCAATTATGAGTCTGTTTGTAAAAGCATGATATATAAACTAATTAAATATATAATAATTCATCATGCTGATTCTATGTAGAACAAATATTCATGGACACCCTAACATGTTAAGTCAAAAATAAGGTTGGTTTTAGTTTATATAATTATAAATTTGAACAAATGTAAACCAATATTTTTGTGGTTTGATTTTGTAGTTTAAAAATTTTATTATTAAATATTAAAAAATACTTGAAATTTTATTTTAAAAAATTATATAAAGATTTACTTATATTCTACTAACAAAATTATATAAAATTAATAATTATTAAAGTTAAAATACAAACCATCAATTAATATTAAACATTATATATTATTAGTTGTCAAAATGTATCAAGTGAAATTAAATCAAATAATCTTGTTAAAATAGTAATTAATCAACTTATAATGCATATTGATTAAAAAAATAATTAATGATTAAGTCTAAATTAGACAAACTTTAAAAGTAATAAATAATTTTTTTATGTAGTTTCAACATGTTAAATTACAAACTGAATTATGTAATTTGAAAATTACAAAAATCAAACTATTCAAATTGAATTGGTTTTTTGTTGTTTTCATTTTTTTTTCTTTAGTTTCAGTTTGTTTCGTTTTAAACACATTTGGCTATTGGATACCTATAAGAGAGAAAAATAAAAGTGAAGATTAAAATAAATTGAAGGCCTACTGGTGTGAGAATGCTCACTCGCTAATTGTGGAAGTAAAGTTGCCAGAGACAGCATATGGATCAGTAAAATATGCTGCCTCACTATGTGCTTTTGCGACTTCTGCCTTTTCCTGCCAATATGCATCGAACTCTTTGGCATGGCTCTTCCAATACTCATCATGCTCTAAGATATTGGCATTTAGAGAAGGAATCAATATTACCAAAGAAAGCAAAAGGATAACACTGTGGCAATTTGCCATGTGGACTAATTTTTAGTTTTCTATCTTCTTTTATGTTGGCCGTGGTTTTTGGCTCCAACTCTTGAAGCTAAACCCGGCCACACAACAAAGAGAAAAACTAAAAAGGAAGAACCCCTCTTAGTTATTTGATACCAATAATATAAGAGATCCTCAATTGTATATTCTTAATGGAAACTGTTTATATAGTGAAAGAAAAGTCATATCAAAAGCTAATTTTGGGTCATGGTACTTGAGACACATAATGCTGAAAAAATGGATTATGAACGGTTTTGAGACTAACTTTTGCGTGTGGCTAACACTAGAATAGTCGTTTCCTAATTGGAATATAGCCACAAGAAAATGAGTGATCTTCATTTGCATACCTCTAAAACTAGCATTAAGTAAGTGGTGGTGGTGGGGTTGACCAAATATAAGTGCAAATATTTCTTTTACATCTCTAGTATACATATACCCACCCACTCACACTGCTCTCTTTCTCTATATATATAAATAAATAAAATGTTGCCTTTTTTGTTACAAACTACTGGGAAAAAAAAACTTTTGAAAACAACTTTATAATGTATAATATTTAATTGCATGAAAATTCATTACAATAATGTTTACATATCTATGTATTTTATTTTATAGAGTTTTACTTATAACAATAATTCTATATATTAGATAGATAAAACATAATTTAATAGTTATAATTTTACTAAGAGGAGCTAACTTCAACTACAAGGGTTTAGTCCCTAAGGCTCCAATGTTCAAAAGAGAGATGTCTACTTTTAATGTTCAACTATATATATGCCTCATAGGATTCTCTTCTAAGAATATCTATGAGAAAAAATAACTAATTTTTTATTACTTATAGTTACAATTATTTCATTTTTTGTTAATTTCTTTTAATTATACCGTAATTATTATATAAAGTATTTAATTTTCTTATGATATTAATTATAACAAGACTAATATTTTATATGCTATATATTTTTGCAACTATATATTAATTGCTTTTAATTAGGTTAAAACTTTTGACAATTTAGCAACTATATGTTAATTGTTTTTCGGTAATGATTTATAATTTCATATTATTTTAATTTATTTTAAATAGTTATTTGGAAAATTTTAAATTCCTATTAATTTGATACTTTAATTGTTTATATAAAAATATAAATCATTATTGATTTATGTACTAAATTTTTACCTCCTAAACATTTTCTTTCCATGGTGAAGGAACTCGAACCTTTATAAACCATCAATTCGCTAGCATATATGAGTATGCCTTAGATAAGTGCCAACAACATATTTTTTTAATATATTTTATTATTAGTTGAAATTTATTAAAAATTATAAAATAAGAAAAGAGTTATTAAATAAGAGGTGAGATTATCTTTTTATTTTCAATAAATTTTAATTACCAAGAAAAAATGAGAAAGTGTTTAAAAAACATGTTAAATAATGTATTGATACCAAGTGTAAAAACAATTAATAATTAACAACACTCTTTCATATATTCTTTTAGATACATCCTGATTCATTTGTTTTTGTTATGAAAATAATGATTTTTTTTACAAATGAAAATAATAGATTTTTTCTTTAATTTAATACTACTTCATTCACATTTTTAAATATTTTTTAATAATTTTTATAAGATTTTTAATTATTTTATTATTATTTTTACTAAAATACTTTTAATTAATATCGAATCATTGTTATAAAACAAATTTCTATAAAAAATTATAAAAAAAAATTAAGAAAATGTGAACGGAAGTAGTACTAAATTAAGGAAGGAATTCCATAAAATAAAGGAACCAAATCATTCAGCAAAAATAATAAGAACAAGTGTGCGTAAGATCAACTCCAACGGAGTATATCTGCTCAATTTTTATGAACAATATCAGTTCTTATTATCTAAAATGCCATTGGAGATTAATCAAAATTAGTATTGGGTCCTTAAATGAGCTAGGGTACTTCAAAGCTTATGTGGGTCGTGTTTTTACATCAAAAGTATTTTTATAATTAAAAATAATTTTAAATTGATTTTTTGCTTACAAAATTATATCCCAGGTTGCAACTTAACATTTTTTTCCAAAAAAAAAGTCATACAAGATAATCATTGTATCTAGCGAGATCTTAATTAGATTAAAAAGGAAGGGTGAAAAAACGACTACAAACACTTGGAGACATAGACCAAACCGAAGGCAAGAAAGTTACAAAAAATATAAGGGATACATACACTTGGGGGACATAGACCAAACCAAGGTATAGCCAAGTAATCTGAGAGCAAAACTTTGTGCAAATAGTATAGCCAAAGTATATTAAAAATCAAGAAAAGAAAAATACAAACACCCTTGGGGGACATAGACCAAACCCAAGGAAGAAAGTTACAAAAATCTGTAATTGGCTTATACTATTGGCGCAAAGTATATACAAGCTATACACCTGACCCAAGGATTTCTTACTTTCTTACCAATAAAAGTGTTTCATCGTATATAAATTTATGTCTGTCTTTTTATTTGAACAATGTAAATCTTTGCTTTGCATCCCAATACTAAAATTCGGAAGTGCCACAAAACTTATTTTATTTCCTGTTGTCTTCTACAGTACTCAAAAACTACAAAGAAAGACAACATATGAACTTCATGAATATCAGCATACATTTTGTTGTAGTTGAATTTCCTGTTATGTGAACTCCGACTTTAATCATGTTTATGATAGAATTCAGCTATAATTTTTTATTGTCAAACATGCATCTATTCCTACTCCCCAAACAGTAAAAGTAGAGAAAAATGATTGTGTACAAATTTTTATATTGACTTTTTATTTTTCCTTGCTAGGTCTGTGTCTTTTTCTTTATTTTGGACTCAGTCAGTCTCTAGTGTTCTTCGATCCACTGTTGTAAGTCCTATATAGGAATGTTGGTTTATGCATGAAGGTAAGAAAAATTCTCAGTAACTCTTTTATTTTTATGTTGTCCTAATATTCAGCTGCAGTAGATAAAAATCATGAGCACACCCTAACACAATCATAAATTTTTTATTTATATAAGTTTATTGAATTTATCTATTAATAATTTAAAAAATATATAAATAAAAAATTATAAAATTTTAAAATTTGTACGCTCTCCGTACACAACTGATAAAAGTAATGAAAGCAAGACTAATGTCTTTGACTTGTTGAAAACACTTTTTACGGCAAACGGAGAGGATAGATAAAATTATTTTATTCCTTAATTAATGACATGACCGAGCCAATCCATCCCTAAGACTAGAGGCGAAGTTACAAAAAAGGAACAAATGATCAGCTATTTCTAAGTGCTTACCACATAAACTACTAGAAACTAAAGCCATCCTATTCTTTCTCAAAACTTCATCTGTTGCCATTTTTCCGATGTTCAGTATCCATAAATTGAAAGTTTTGGAAGGTGGGATGTAGTTATTCCAAATAGACTTTTCCCACTATATCTCATTAATTTGATTTGCTATAGAATCAAGAAGCCAACAATCTGTCGAGAAATTTATGCTCTTATATACCATCACCCAAAATCCAAGTTGAATCTTCAAATAAATAATAATAAAAGGTCTTATAACATGCCAAATGAAGGAAGAGAAAAAGGAATTCCTCTCAACTCTAGCTTTGGTAGAACATGCCCATTATTTCTCAACAATGTTGATTTCCCAAGTTTCTTTGAACATAGTAGCTTCATTAATCCTCTATGGCTTCCCTCATGAATGGGTTGTTTGCATACCTTACTCCAAGCTAGGGTCACAAGCATTTTGGTTTGAATGTCCCTTGTCCAGACAAATTCATAATCCACTTTTTCTTCATGGTTTAATCGGACATATAGGCCAAGCATAAATGAGGAACGAATATAGTAGAGCAACCTAGTCAATTAGCACGTTTCGAACCATCACATGATCTATTATCCCGGTCAATTAGTATGTATCATATGGTTAATTCATCAATTTATTTTATAAATTATCTCAATCAAATAATTATATATTATATACTAATTAGTTAGAATTATAAATGACATGGTAATCCAAGATTATGAAATAATTTTCTTCTAGATAAGGAAATTGACCAACTCCACTCCTCCATAAAAGATAACAGGTTGCCTTTCCAGTTAGCAAGCTTCAAGGATTAGATGTACGTAGCATGTACATGTTTTCCCTTGAAAATTGGGACCCCTAGATAATCAAAAGACAACCTTTATTAAAATTGATTAGAGGCAATGCTGACAACTCTAGGAGAGATAGAACCATTGTAGAACTTAGATTTTTTCAAACTAACCATTTGCCCAAAAGTTTGGATATAAGAATTCAGCAGCTTAGTTACACTAATAATGTTTTTCTTAGCTTCCTGTTAGAAAATTATTACATGATTCACATCCTTAGCATAAAGTACATGAGTGAGAGTGTTATAACTTTCGGGACTAGCCATAAAAGTCTGCCAGAGTCAAGCAAATGTTGTATCCCCTGCTGAGAACCTCTTTTGCTAAGCAAAAAAGCAAAGGAGAAAAGAGATCTCCTTGCCTCACCTATCTTTTACAAGCAAGGATTGGCTATTCACAAAAATGGAGAGCTTGGTAGAGATCAGAATGTTTTGCACCCAACTGTAGAAAGTACAGTTGAAGCCAAATATGCTCAGAATTTTTAAGATAAATTCCAAATCCATAGTGTCAAAAAGCCATTTATGTCAATTTTTATGGATAAATTTCCCCCGTGTACTTTATTATCACATATCTTTTACAAGCAAGGATTGGCTATTCACAAAAATGGAGAGCTTGGCAGAGATAAGGATGTTTTGCACCCAATTGTAGAAAGTAGAGTTGAAGCCAAATCTGCTCAGAACTTTTTAAGATAAATTCCAAATCCATGACAGCTGCTGAATTTTCACTGGATGTTCAATAACTCTGATTTTTTATAACATGGGGTGTTTTTGTCACCTTGAATATGTCATTGAATCCTAACTTTTCTCTCCAAAAATCCTCTTGGTCATGAAGAGCTTGCTGCATATTTCTTTGGGCCACCTCCTCATATTCTATAAGAATGTCGGAGAAACATTCATGTTAGAGTTAACTGCATTTGTGGCTAACTCCATTTTTTTACACACTCGGAACTTCAAAGCAGCAACCTTTCCAGACCTTTCTTTTAATATTTTGCAACCCCTTTTTTTCATAACTTTTTTCTCCTCTTCAAATAATTTTTCATTTTTTATCTTATTTTTCTTTTTGGAGAGAGATGGCAATTTTTTCACTTTTTATCTCACCTAAATAGCATCACTCACACATTTTTTTGGGACCTCAAGTCTTCCCTTTAAAAGTTGCTAATCTTATATAAAAGGGTCACCACAAAATAATATACAGTAATAATAAAGAGATAAAAAAATATGTCGAACTCAAATGGGAAAACTAAAGGTAATATGTATTAAAGGCTCAATAATCAAGAACAAAGCTTAAAAATAACCTCTAATTAAATTCACATACATACAAAGAGACAAACTCGTTTAAACATGTACTTTATCTCACTAATTAGAATATACAAAACTTTTATTTATATATATATATATATATATATATATATTACACAATGAAAGAACTAAAAATTATTTATAAATGTAGTTCCTATCATGGACTTCTGATTATGTCAATATTTCCAACACCCTGTACATGTGTTTTGAAAACATTTATAAGTATAAATAACTTTTCAATCATCAAATCATTCACAAATGATTCAAAATGCATTCTACAACTCAATACATAAAAAACATATATAAAATGAATATGTTTAACATATAATTCTTTACAAAAAAAACAAATGTTCTTTTATGTCCATAATATTTTTCACATTGGAGTTTCTGAGCTAGATAATTAGTGATGCATTTATTTTCTATGACTCACCGCTCTCCAAAATGTCGGTGAAGAAATCACGAACCTCCACATTACAAAAATTTTGTCTCTATAAATAAGTCGTTTAGATTATGGAAAATTTTTCTACAAAAGAGTAAAAGTGACTTCCTAAGACATATCAAACAAAGTAATAAAAATTTATTACAACTATAATGGTTTTTAGATGCAATTATAATGTGAAATTTTCCTTCCTTGTAATGTCATAAAATCTTCTTTTTACAACATTATTATTCATATAGAATTTTTCTTACAAAATAATAAATGTGACTTTCTAAGACATACTAGGCAAAGTAATAAAAACATACCAACAACTATAATGATTTTTAGACGCAATTACAATGTGAGATTTTGACTCTTTATAATATCATAAAGTCTTTTTTTACAACATTATTATTCGTATAGAAACACAGTTAATTAGTAAATAATCTATCTTCCTATAGCATTAATGTCTAAAAGAGGAAATATAAAAAAAAGATAAGGAGAGAATTACCGTGTAATTTCATTAAAAATTATATTATTATATTATACATCACATTAATGATGACATTTTTATTAAAAATAATATCATTGCTAAACAGATAATTTTTTTTTGTTTTAATAACCTTTTTTTAATTATGTAGCCTGGCCTGATTAAATAAAAGCTTTCTTAAAAATTGAGTGTCTAGTTTTTTTTTATTAATAAATAAAATCTAACTAGGTTTTAAATAAGCTAGATCATACTTCAAATCTACACTTACCCTCGTGTCCAACTCTCGTTGTGGACAAAATGCTTTTCGCGTCTTCACAAGGAACTGTATATCCGTCCAAACAACCATCAGCATAAAGGCATTTTGCTGTACAGAGCCAAATCATTGCAGATATTTAATATGATGTTCTTATATAAATAACATTATTAGTCACTTGCAAGATCTTCTCCTTTGTTGCATAATTTTGATACCATTGTTTTATGACCCTTACAAATACATTGGCCTTTTATTTTTTTGTCCTTAACTAAAATTCTGATAAAGTCATGAAACTATCTGTCATGATCTGAACATTAGGCACTATGTACCCTTTCTAGAATAACTCTTTGATTCAAATCCAATCCTTAAAATTGTAAATTAAAGTTCAAATTTACTATTCATGAACTGAAAAATTATAATTTAAAAATATCAAAAATATTTTTGATAAATTATTGCTTTAAAATAAACAAATATCCACTTTATATATAAGAATTGTTTAGATTATTATAATTTTATTTTTTTATATTATAATAATTGTTTATATGATGTCGACAGCTTGAAGTTGACTTAAAGTTAAATCCGTATATAGCTTTTATATTAATGGAGGTATTAATATAACCTTCTTAAAAAATCTCCACTAATTAATTTACGAAAGTATAAACTTAAACAAAATTGTTTGCTCATACATTATTATGAAAACAAAATAATAAAGTAAAAGTACATCTAATCGGAATTTGAAAAGGGAAAGGGAGGAGAAGTTCTAAACCTAACTCTATGTTATTAATAACACAATGTTTTGAAACATAATCTACAACAGAAAATTTTCAAGTTGCTTTGTTTGGATAAATTAATTTTAAATTGTTTGAGTTTTAATTTTGATAAAATATTTTAATTCAAGTACAAAAATTTATTTTAATATTAACAAATTATATATTAAAGTTTTACATGAAACACTAAATTTTAATACATTTCTTACTGAAATAGGCAACACTAATTATACAACTAACACACTAAACTTTGTATACCTTCACATGTTACTCCCAAAGCATGCTTGGCTTGACCTAAAGAGTATAAATTCAAATTTGATGGTCAATGCACATCTCACTATATTGTGGAGATGATCAAAGTGATGTGACTAACACTCTAGAGATTTACATGTCACATTGGAGTTTCAACACGTCTCTGATAATAGAGAATTTCTTCCTGCATTTCCATAATTTCTCCCTACACTTCTATAAAGGTAGGAAAAGTCACAAATACCCTAGATAAAAAAATAAGTTTAATCCTAATAAAAAATTTGCAAATTTTTTTACAAGTCCGCACAGGGATGTCCGAACTTAGTCTGGACAGGGGTGTCCAAACAAGGGTTTTCGGACTTGTAAAAAGAATTGCAAAATTTTTTACAAGTCCAAACAAAGGTGTCCGGACTTATAAAATAAAATTTGCAAATATTTTTACAAGTCCGGACAAGGGTGTCCGGACTTGTAAAAAAATTTAATATACCGAGAGAAGATAAATGCAAAGTTGAACCACAAAGAACAAAAAAAACACAGAGGGGGTGAACAACAATGCACGAAGAAGAAAAGAAAACCACTTATTCAGTGAGAAGAAAAACAAAGTCGTGCAAGAGAAACTAATAATAGAGATACGAAATGAGAGACGTGCCAAACAAGAAAGAGATGCAGATGAAATAGAAAAAGAAAGAGGTTCGTGCTAATTAAATTTTTACTATTTTTATTAAGGAATTTTTTACCATTTTGAAAAATTATGGAGGTGTTGGGAGAACTTATTGGAGAGTAGGGAAAAATCCTCCTCATAATAATATGGAATAGGCCACAAAGTTACCCAGGATGTATGCATGTATTGAATTGTGGGGCATTTGCCCCACTAACTTTTTAAATTTGTTTTCACTCTCATTTGTAACTAGTTAATTTTGTAACAAACTCTAAATTTTCTCCAAGCTATCCATGTGCTATAATGACATGGTAGTTACATTTTTTTTATTTTTTTTGCTTCATGGTAGTGGTAGTTCCTTAGTCACATATATGTTCTTTTAAAAAATCAACAAAGTAAATTTTAGTAATTATGATTTTTGTAGCTATAGCTTTTCTTCAATATTTAAATTTTTTAACTAGTTATGATTAAAGAATATTTATCTTTCTATCCAAATTGTCTTTAATATTTAAATTTTTTAACTAGTTATGATTAAAGAATATTTATCTTTCTATCCAAATTGTTAAAAATAATTAATTCAAATATTTTATGTAATATATATTTAAATTTACTAACAGGTAACTTTGACATTTTATGTAATAACAATTAAAAAATATTTGTTTATTTTAATAGTTATGAAGATATTTACTTAAAACCAATTGAAAAGATAATTCAATATTATTTTTTTGTTTTTTTAGTTACAATTTTTATTTAATATCAATTAAAAAGATAAGTTAGCATTTTATTTTTACTTCAATGGTTACAATTTTTACTTAAAAATAATTAAAAAATAAGTTAACATTTTATTTTGATGTAAATAAGTTAATATTTTAAATTTGTTAGACAAATTTCTACCGATTAAATTATTATTTTCAATTTTGATCTTACTGTTACATTAATTAATTTTGTTCTTCTTTCATCTCAACAAAATATTGGTTTTCCTTTTACTTTTATTTTCTTTGGTTGCTTTTCTTTTAAATTTTTTCTATTTAGTAATATAATATTTATTTGGTAAAGATTTTCTTCTCAAATCTTAAAGTTTGTTATCTCATCTTTGTCAATTTTCTGTATGTAAATGTAAAGTTCTGACTTTTACAATTTTTATTTTAAACATTGCATTATGTTTCTGCTACTTAAAATTTTTAGATATGTCTTGTTTCTAGGGCATTGGAACTTTGTATACCACGCATGGATAAATAATTTATACAGAGAATGAATATAATTTAAATAACTTTTTTGCAAATAAACTAAACAACGCTGATTGAAAAATATGTTGGAAATAATAGTAGATTGGTATTAATCAATTATATTTTATCATTATCTGGCAATTTAAGATATGATGATAATCATATCTTATACTATCTTTATGATTATTTGAATAGTATTATAGTAAGATTGACTCTGTGATGGATTGAGTCAATCATAAAAAGCCCATTTGAGGGGTCTCTACCTATCCTGGGAGATTATAAATTTGTCATCCCATTAAGCAAATTACTACAACAAAAATACACATTCTCTAAAATAATCCCCTAGAAAGTAGGTAGTAAAATCCTCAAGAGTTCTTATTGAACTCATATCTCTACAATAATCATTCCTAGGTTTTTTTTTTGTTCTTGAAGATCAAGAACTTCAATTCAATATATTTGAGGTACACAAATTCTCTTTCCTCTATCTTTTTATATTTAATTCTCTATACATACTATAATCTTATATCTATTGATTTAAGGCTTCCTTCTATTTCCATCAATTGGTATCAGAGTCAAATTAGATACATATTATGGTTGTTTTCTATTAGAGAATTATGGTTGTTTTCTATTAGAAAATTAAATTTGAATTGAAGATTTTTTGTGTTATTAGTGAAATTTTATAATATAGTTCACTATTATCTTTTTCACAAAAAAAAAAATGAGGGTTTACGCTACTTGTTATTGTTAAAATAACATGTTAGAGTTTCATTCTCTTACTCTTACATGGGTAAATTATATATTGAAACTTCTTTTTAAGTGTTACCCATTTAAAACCTAGTTTTCTTTTAAATAATTATGGGATAAATTGTTTTCAAAATTACTTAATGGTTTTCCTTTTTTATGTTTGACCAATGTGAGTCATTTGTGTGGGCAACATAATATATTTGTGTTAACTTTACTTTGGAAAGTGTTAATGGGGTTGCATGGACTCATTTTTATAACCATATTTTTGTGATTTGGTCAAGGGAGAACTTTGTCGTTTTGATACGATCATGTATGATGATTCGTGTGTTAAATTCATTCTCAGGAGCATTTAAATGTGGTTGCTAATTTTTTATATTCTTATTTTTTCAAAAATACCATATTTATTTAATATTTTTATATTATTGGTACTTTTGAGTATAAGAAAATTTGATTAATTCAAGATTAAATTAAATTTTTTTTACTATTATAATCTTTTATTTTTGACCTATTTTCATTGTGATAATTCTTTACAGTATTTGTATTCTCCAATTACATTGTACTCTCTTTAATATTGAATTATCATTTATAAATTGATTTTAGGTTATTTTATTAATTATGCACAATCTTAATTGTCCTTCTCTTATAAGCATAATTTTCTTTATTAATTTGTATTATTATTACTTGTCTATCATGGGTATAATAATGTGAATTTTGTATGTTGGTCATATAATATATATGATTAAAATTATGCAAATTTATTGGACAATATGCATAATTTCTTTTTTTCATTTACATAATTATAATTTCACTATTTTGGATGCATTTACGTGAATTTTGTGATATAATTATTTTTTTATTGCATTGATGATAACTATACTCTTTTAATGTAATTTGGTGTTATACAATGTACTTTTCTTGGCTTATGTTAATGATTTTCTTATATCCTATCGGTATTAGGATTTTATTGACATAAGTTATAGTGCATTGTAATTGCCTTAGGGATTCTCTTTTAACTAAACTTTTAGAATTATATAATGTTTCCCTATTTTTGTAATGTTCAGTTTATTTCCCTCATTTGATCACGTTTAAGGTATATTTATATGAAACCAAAATTTACACTCTCATTTTCTTTTTGTTCCATAATGACTGATAACTTTTAATTGGACATTTTTCCTTCAAAACAAAAAAAAAATGTTGCAATTTTGTCATGCAAATTTTCTATATATATAAAGAAATAGTTGAATTTTATTTAGTCCTCTAGGTATTTTTTTGTTATGTTAACTTATTTTTTCTTTATCAAGTGGAAGGATTTTGTATATTAGAATTTTAATTAATATCTTATAAAATAAATTGTCGTGATATAAGATTTTTACCTTAAATGTCCAATTAATCATACATGTGCAAAAACAAATGTTCTTGATAAAATTATTTTTTCTTATCACATTATTTGTGATCACATTGTTGGGATCTATATTAAGGATTTTATATTGGTCTCTTGTAAAATATTTTCTTGTATAACAAACTCTCTATTGATTTGCAATATTAGTATACAATTCTTGTAAGGACAATATAGGAATCCCAAATTTTAAGAGATTAATTTCTCCATACCATATTTTATAATATTGTTAATGGTATTCTTGTAAAAGCTAGAGGCTTTATTTTGGGATATATAAATAAACCTATGTCCATTATAAATTGTTATGAGAGTTAGAGACTATTTATTATTATATCCTTAATATATGCAAGAATAGGTCTCATTCTTCTGCTGCGTGTAATCATATTTTATTCTCCAGTGTGTTGAGAACTTGCTTATGATTTCATATTTTACGTAAAATTATCAAGTGATCCATTTTCTCACTCATGTAATTATTTTTTCAAGATCCTCATAGGGGTCAATATTTTTGTAAAGATTGATTAATATGTGGTTAATTATGAAACCATTTGTGAGAATTATTTATACTTATGGATGAATTTGTAGGTTTCATATTCTTGTTATTTTAACCACTTCTCTCATTAATCATTTGTTATTCTACTACTTTTTAATTCCTTAAGTAGAATAATAGTGAATTTTAATTCACTTTTATTATTATATTATAAAGTCATCATCCCACTATCACTAGAACTTTTAATACTAGTGTACCCTAATGATAATCCTAATATTTTTTTGGTATATTAAGGATTAGTGGGAGTATATATAATCTTGTATTATCTTTCAAAACTTATATATTTTTATTGTCATATAAACGTGTGCAGATTTAATTATGATATGACATAATAGGGCTTCTCTATTTATTTTTGTCCTATTTTTATTGAGATACATAAAATCCATTGTATCTTTGTAGACATCTTTAACTAATGTTAAGGTCATTCTGTTGGGTAACTGCACATTAATCCTTTTGGCATAAATTATGCATTGTGCATCTCTTTTACCCAAATTTCATATTTTAATTGATCAAAATTTTAGAAGTATATAATTTTGTATCATGTCTCGAGACTTATCTATCTGTATTATCATATATTCTTGTGCACATTTAATTATGATATGACATACTTTATAGGACTTGACTATTTATTTTTGTCCTATTTTAATTGAGATACATAATTCATTGTATCTTAATAGACATCTTTAATGGATGTTAAGAGCATTTTGTTGGGCATTGCACATTAATTCTTTTGGTATGCAATTAAGTATTGTGCATTTCTTTACCCAAAATTTCACATTTTGTTTGGTCAAAATTCTATAAGTATATTGTAGATGCAATACTCCTATCGGGTATGATTTTCTACTTTGTAAAAAAGTGCTTATTATGATAGTACTCCTATTGAGTACAATTTTGCACTATTGAAGTACTTATTAATTTTTTTTTTGTTTAGACCAATTATCTAAGTGTTTGCTCAATTGACATTTTGTGGCCACAATAATCTGAGTGTCATTTTATATAAACTAGGTGTCTATGAGGTTTTAGTAGGGAATTTATGGATTTCCTACTTATCTTTGAATTCTTACATAGTCACTCATTTTTGAAACTCGGATTAGTTAAATGTCAAATATTATAGAGCATTTATGTAGCCTATATGTAATTACATATGTTCTTAGGCTATGATGAATAATTAGATGCATGTAAATTATGCTTTCTCACCTATATAATTTTTCGGACTCAAGTAAAAAAAGATTATATTAATTAAACACTTTTTTATTCACTGATCAAATACTTAACTTTGGAGTTTTATAACTCATATGGTTTGGTTAAGTTTTGATGTCTTAGATAAGTGGGAGTCTAAAACTCTGTTATGAGATATGTGTGAAGTAATATCATTTTAGTAACATATCTCTTAGCATTTTTGGATGCTTGAGACCATGTAGTATTATTTTATTGAACTACATTATTCTATATACTTTATGAGAAAGATTTGTTAATGTGCATGATATATATCCCTATCGGATATTATTTTGTAGCTCAAATTTCTCATTATCTAATATAAGATTTGTCTATAATTGTCATTCTAGCTTAATGATTTGTCTTTGTATTATTTATTAATACCATCCAAGTGGGAGAATGTTGGAAATAATAGTGGATTGGTATTAATCAATTATATTTTATCATTATCTGGCAATTTAAGATATGATGATAATCATATCTTATAATATCTTTATGATTATTTGAATGAGATTATAGTAAGATTGACTCTGTGATGGGTTGAGTCAATCATAAAAAGCCCATTTGAGGGGTCTCTACCTACCCTGGGGGATTATAAATTTGTCATCCCATTAAGCAAATTACTACAACAAAAATACATATTCTCTAAAATAACCCCCTAGAAAGTAGCTAGTAAAATCCTCAAGAGTTCTTATTGAACTCATATCTCTACAATAATCATTCCTAGGGTTTTTTTGTTCTTGAAGATCAAGAACTTCAATTCAATATATTTGAGGTACACAAATTTTCTTTCCTCTATCTTTTTATATTTAATTCTCTATACATACTATAATTCCTAAGGTTTCTTTTTATTTCCATCAAAATAACCATAAACAACGTCTATTAAAAAAAATTATCAACATCAACCAAAAAATAGTTATGCTAACTTTGACTGATGTAGGTAAAAAAAAGTCTCAATCAAACAATAATCTTGGCCAACTTTTTCCTAAATTAAACCTCGGCAAAAAAAACTACCGGCAAAAAAGTAGAAAAATAATCATAACCAACAATATTAGTAGCCAACTTTGTCCTAAACAAACATTGGCTGAAAAATAATCATAGCCAACAAGTAGAAAAATAATCTTGGTCTACTTTAACAAATATCAACCAATTTTGAGCAAAAAATTATCTCGGCCAACTTTAACAAAACAAAAAGTAAGTTTGAAAATTTTCAAATTCTTACTTTTTAAAAAAAAAATAAGATTCTAAAATTTTAACTAATCAAAATATTTTCATAAATAACTAGAATTTCAAATTCTCTTAAAATTTCTTATCCAAACAAAATATTTTATAATAAAGTATTTAAAATTCTATAATGAAATGAATATTTCTCATAAAATTCCTCATCCAAGCACAAGGTTAAAGAATGATGAACCATCAATGGTAGTTTTATACATTCTTGTCTATACTAAATATTGTATACCGTGTATTAACATAGTAATAATGTATAATATGAAGGCTCACTAATTTTAGATGAGCCAGCATTTTGCTGAAATGAACCATCTGCAGATCTCTATAATATTGCTTTATGCAGCATATATACCTCAGCAACAGTGGCACATTCAACTCACTTCAATTGTGGCTTTGCCATACCAATATACCACCATCTATATTCTTCTGTCTTTATACTTGCCTCCTAAGAAACATATACAAGGTGGTGGTGATTTTCCAAGGAAACATAATACACATAAAAGATACATAGAATTATATTATGATGCCTCCCAAATCTTATAGTCTCTTCCCTCCAAAGGTGAGGACCATCTTTGAGATCCACTAGGAGGTTCAAAATGACCAGGTCCAATCTTCATAGCAACTTTTTCATCCATGATAGCTGCATAAACATCCCTTTCTGCCTTGCAGATTTTAACCTTAAAACAAGAGAGAAAGGAGAGTGTTTCATTAATATGATTTTTTGTACGTTATCAAAAGAACATCTTTTGATTTTGATCAAGATAACAATAAAATGTAAGCATGTATATGGCTTAACTCTCAGCACAAGTTATTGTAGCCAAAACATAGACATATTATGATGAGTAATTAGGTAACTCTTTTAACCCAAGTTCATAACCAAAATTTGCTTTGTGATAGAACCCCATCACTGTAGGAGAAGCAAATTTGATAAGGGAATCGAAACTCCAGATAGTGAGGACTGTGAGAAAGAGGCATGGAATGGGGATTTGAACTGCAACAAGCTAGCTTAAATAACAAGTATAAGGGAACATATAGGAACAAAGCAAGGCATTAAAGAAAGGGATAAAGGAACTGGTGCTGGAGAGTTATGTGGGAATCAAGCAAGGTTTTGGAAACAGTATACACTACAGATTATTGCTTTCTATATTTTCCTTTTTAGGTTTGAAAGAATTATATAGGAGTTATCAATTTTTGGTATCTGTAAGTTTCAGTAACAGTGGCTTTCCGTAAATAATGCAGTGATATTAACCATTTGTCTAAGATGTTCATTTTATCTCCTTGAAACATCCCTATGCAGTGTGCAGTGGCTGAGGCGTTCATCAAGGATGTTGCTAAATTGCATGGCTTTCTTAAGTCTATTATCAGTGACCCTGATCCTCTTCAGCAAGTTATGGGGTGAATTATTTTGACTACAAGGGACAATGTTGAGGATGAGTACCACCTATTATCCTCAAACTGACGACCAAACGAAGGTTGTCAATATCTGCTTAGAGAGTTTTCTTCACTGTTCTGCTTTGGAGCAGCCTTCCAAATGACACTTATGGCTTTCTTGGGCTGAGTATTGGTATAGTACTTCTTCCCATTCAGCCACGGGCAAGTCCCCATTTGATATTGTCTATGGCTCCTCCAAGTGGATTTTGTGGCTACTATTCTGATTGATCATGACGAAGCCCTCTGCCAATTGAAGTTTCACTTACACTGAGCTAAACAAACCGTGAAGAAGTATGTGGATACTTGTTGTTGCCACCATGTCACTTTTGAGGTGGGGGATCGGCTTTATGTGAAGTTCCAACCCCATAAAGCAATAATCTCCGGGCTCAAAGGATCAACCCCAAGCTGTCCCCTCACTATTTTGGTCCCTTCCAAGTTTTGTCTTGTGTGGAAAACATTGCTTATAAGCTTCAGCTACTTGAATCTGCTCATATCGTATCCATCCAGTTTTCCATATTTCCCAGCTCAAACATTCTGTGAAGGCTGGATCCAATGTTGCTCCTTTGCCTCTAAGGATGGTAGTTGGTGACCCTGAACCTCTCTGCCTAGAAGCCATTTTGGCTGTTCGAGAGGGCAAACTGGACAGTAGTCCAGATGAGTGGCTTGTTTTGTGGAAGGCACAACCTATAAGGCCAAATTTCCTAATTTCTGCCTTGAGGAAAACGCATCTATTATTGGGAGATGGTATTGATAGGAACTTAACTTCTAAATGGGATAAGCCATTTAAAGTTTATTTCCATAGGCCGAAATTAAATAAGGCTTGAGTCTTTTGTCTTAGTGGATGCTAGTATGGGACTTAGTTAAAGGAGAGAGAAACTGGGGATGGGTTTTATTGTATGGTTGTGAGCCATGATTGTATGAATCCTTGTGGATATGGAATAGAATTTGGGAAGTCTAGAGAACCTTTCTCTGACTTTGGGGGAGCTTTGTTCCCATTCATTCAGCGCCTTTTTATTCTTTTTCCTATTAATTCTCTTTTTCTGCAGGTACCTTTGATAGTTTAATACTAACCATATCAAAATGCTTTGAAAAAGTTCCTAATCATCCATCCCAGAGAATTTCCCCTTAAACAATACTATACAATATGCAGTACATAAGAGAATATTCTAATGCAGTAATGCTTACTGTACTCCTGCAGTTGATCTTGTTCCGCTGCCGGATAGAGATAAGTGCCGCTATTTCAGTTTTATAGTGAGAAAAAAGATGGTCATAGAACACTGATGGAGTTCCTGGGTGAGTAAGAGTGTAAGCATATCCCTGCATTTCTTTTCCACTGGGAAATCTCCAATGACCCTTCACAAGATAAAAAATGAAAGAAACTTTATGATAGTATATATATTTGAAAAGATTCAAAGGATAATGCTTAATTTGAAATATGTTCAATTTTACTAGTGCAGTCATTCATAATAATAGGTGCATAGTCAATGAACCTTGAAAAAGAATCTCTAACAGTGCCAAGATATTTTCGACAAGAAGTTCAAACCTGAGTAGAACCAGTGTCATGATTTTCAATAAAAGTAACAGCACGGGATGGCCACCATCCAAGAACACCAGGGGGTTTCCCCTTTTGATCTGACAAGCGCCAATATTCACATCTTTCCAAAGCCTATATTGAAAAGAATTTAAACAAAAAGTCACAAAGAATAAATAATATACTTGCAGCCTGCTGACCTGGTAAAAAGAAAAGAAAAAGTTGCATGCACTTTTTTTGGCTCATCTTTTGAAGCATCAATTACAATAGGTGCAGTGAGTTTCAGTTCGAACTTCAAAAACAAATTAAGAGCCTAAGGTAAGGGTTTTTACATCAAAACAGCCACATAATTTTCTAAAATATGAAGATATCTGACAATGTGTGTAGGAAAAGTTATCAGCAAGAAAATCTTACAAAAAGTTTATGTTAATTCATCAACATTTATAATACATATAATTAATTCACAATATAATCCTCTCCTGCATGAGCATCCATTAAAATCTTGGCCATGGAAGTAAGCAGCTTATCAGCAATGAGATTATTTAAAACAAAGAAGCTCAAGAAACATAGCAGTTTACTGCCTTTGCACCAAAACATTGCAAACAAATTCCAGCAAGCCAATGAAATTGGTAGCATTTCCAAAGAGATAAATGACTTTGTAAAATTTTGAAGTCGTCCAAGAGCCGTGTCCTTTAGATTCGGAGATTTTTATGCATGAAGTAATTTAATAAATGTTATTGACAGATGGACAATCAAGTTAAGTGCTTACAGAGTGAAGAATCCCTTTGGTTGTAACATCAAATGCACCCGCAGTACCACCAGTAGCATTGATCCAGTCAATGATCCTCTGTCTATGTGCATCTTGATTATGATCCATTTCACCATATGTATAACTAAGGGAATCCCAGTACTCGCCTACAGCAAAGTATGGTTCAGTTGCTTCCAGGTAGTCCTTTACATAACCACCCCAAAATCCTCTGACAAAGTCAAGCCTCCACCCATCATAACCAATTTCTTCCCTGAAAAGTAAGCAGTATTAGTAACACAAAGATGATGCTTGCAAACTTCAATGCAACAGACACAATAGAGGACACTTCAACATAGTTAATGTCCAACATATTGGAACCGTGACACACATCAACATATAGCTAATGTCCAACACATTAGAGACACACACATACATATACAATGGTTAGGAAGTTGTTTTGAAATGGTGAATATACCTAGAAAGAAATAATACATGTTTTGGGATTCCTTACGTAAAGAGACAGTGCTTACATATAAAATTATGCCTCTTGATACTTTTCTGTGAGGTTTATCATAGGAAGAAGGTGACATGTATTGAGTCCACGAAATCATTGATCCATGAAGGAAATGTCATAGGGTAAAGCCCAGAAATTAAGATACAAATGAGCCTCAATGCTGCAGCTTGAATAAAAGATAAGGACTGGAATCCTTAATTGTTGTTGGATGTTTGAGATTAATTAAGACACCCATAAATTTGTGATGATGATAAGACAGAACTCTTATCTCTGATCTGTTTGCTATACATCAAGCATCCTCTTATAAATAAGTTAGAACTCTTGTTATATCATGATGCCAAAGCACACAAATTCTAGCAAGAAACTAAAACACCATGTAATTGATTAACCCACATTCAGAAGTCTGAAACAAACTGCTTACAACAGAAAAGCTTACAAAAAATCTAGAAAGTTTAACTTATGTTTTTATGCCAAATTGTTTAGTTCTCCAGCATAGCCACTTTAGAAATGAAACCATGAATCATGAAATGATAATGTTTGAAGTGACATATTGACTGGCTATATTTTCATCAAACAAAACATTCTGTGCCCATTGTAAGGTATTGAAAATCAGGATCTGGAATACAAACCTTAGCCAGCATAACCATTCTTTAAGATCTTTTCTCACAAATTCCTGCGAGTGATCAATGTTTGGAGCAGCATGAAAATTGTCTCCACTACTCTTGTTACCCCTTCCCTGCATATATACTATTTATATCAGATTCACCCTGAAAAATAACTGCACCATTTTATTACACACTATGACACTAATAAGAAAAAAGTAGTTATATTGCTGCGAGTATAGAAAAAAGTAGATAAGATCTATCCAATTCTTTTAGGATGATTACTACTACTAAGTAAAGAGCATGCAAATCCAAAACTCTCATCTACCTGAAAATGTGGATCATCAGCTACAATTGCACGCTCATCCCAGTTGAGACGACCTCCAAATAAGTTCCAAATACCATTCTGATTCTTATAGTGAGCACAGCGGTGATTTAAAACGACATCACCAAGCACTTTGATTTCAACTTCATGAAAACTTTTTACCACATCCTTCAGTTGATCAATATTTCCATATCTAAAAAATATTAAAAAAAACACAACAGTTGATATCAAAGTTCATTTTCATGTAATGTATAAATCAGAACACGTAAGAATGTTGCTTTCTACTCAAGTCAAGCAGTGACCATAATATTTTAAGGTAAACAATTTGCCTAAAAGTAGACCCTCCAAATAAATATTTAAAGATAACAGGCATCTGCAATGCAGCTATGAAACAATTAGACCTTTAAAAGGATTTAATCGAGTACCTAGAATTTAAATTATATAAATCCTTTGGCATATATCCTTCAGGCGAAACAGACTCCGTAGGTGGCGGTAACCATATCACAGTAAAGCCAAACGATGCCAGTTCTGCAGCCTTCTCTTTAAGCTCCATATACCATCTTCCAGATTTATGAGATTCCCAATTAAACCCTTGGCATAGTATTTCAAATCCTGTGCCTGTTCCTGAGGAAATTTTTGGAGACAAGTCAGGTGATATCAGTGTCTTGGATTCCACAGCAACCTCAGCTTCCACAATAGCTTCCTCAGAGAAAGTTGGAGCCGAGCTTCTGAAGATACTATAGGCTTCTGCAGCTAGTTTTTCAATTTCTTGGAGAATGCTTTCTTGTGCTTCTTTGGATTTTGTCGTTCGATTCTTCTCAGAGGAAATGTCTGTCACCAAATGCCTTATCTCATTGATTATTCCATCAGTAAATGCAGACATAGATTCCTGTTGACCTGCCTCTACAGTCACTTCCCTCTGCACACCTTCTGATTTATCTTCTCTGTTGCCAGTAATTAAGTTACCAGAACTTGGGAGAGGGATATAAAAGTCATCTCCAATGTTATCTATCCAAGTACTGTCATTTAGCTTAAGAACAAAAAGAAAGCCAGAAAATTCTTCTCCCAAAGAGAGTTGTACTGAACTTCCCTCTCCACTATCTCTTGACTGCAGAAGACGATGGACAAGTAAATATATCATAAAACTTAAATCAGTATTTAGAAGAAGAACTTCAGTATACAAATAGAAGAGTGAGGTAGGGTAAAATGCACTGAGTTGCTGAAATTGTTTAGATATAAAACTTTTAAAAGTAAGTGGTTAAATTGCTAAAACAATGGCTAAGACACCTTACGGAAAAATTGAAGAGAGTTGACTTCAAAAAACACCCAACAAAACTAAAGGTAAGACGAGAACACAAGATTAGTCCTTGAGATATTTTCATAGCATAGTCTTAATTTTTATAGTCTGGTGAGAACAAATCACATTATGCAATTTATTTACTACAATTTTGAAAATGATAGGAAAATCAGGTTTAAAATCCTGTAGAATTATATGTCAAAAACAATAGCATTACCAATGGAGCAATAGTATTGAAATAATGAAATATATATCTCATATCCTAAACAGATGCTAAAATATAGAAAAGGTACTATTTGATAGATCTCTACCTGTAATTTAGTTCTTAAAGCTCTGTCCTTAAATGCTATTGTTTCTGGTGGATGAGGAGCCGATGGGATTTCCCACCACCTCAAATCATCTCTACAAACTCCCCAGTGAAGGAGAATATCTCCAGGTATATCTGTTTCTAAATTTAAAATATTCTTAGCTGTCTCAGAGCACTTCCTAATCGATACACTGATAGAGTTATCAACAATAACTTCCTTGCTAATAGGCAGTTCTACATAGAAACCTTCAAGTTGACTATTTTCCACTTTTGGATTTATGGATCCACTGTTGTCATCTTGAACTTTGTCATGTGTTGCATCTGACTTAAGGAGAATGTTAGATATCTGCCCCAATGCCCCTAGGAGTGAGGAAAGAACATGAAAAGTGTCTCAATTCAAGCTCACCAAAATAATGGTATGAGGACACAGCTAAAAGGATTACAAAATTAAATGAAAAGAAAAAGAGCATCCCAAACACGTATTATAAGCTCAAATAATTATCTTTTCAAAGCTAAGTAGATAACCAACTTGCATTGCAAATTTTATTCAGCACAAAAATTATATACAAGACAATATAGGATCTAATAAGGTTTCATTCTTCTACCATAATGAACATTGAACCCTGTTACTTTTCCCTAGATTAAAATGTAAAAACTACAAATTGAAATACACATCAAATGGCAAACATTTTGTTGTTTCTTTTTTCTTTGCTGCAATATTTTCATGGCTACCGACTCCATTGTTCATTATATATAGAAGAATCTTAAGAAAAAGTTTGTCATTTTCATAAGTTGAAGATAATAAACACAAATGGTACAAGTTGGAAATATGGTCATCATGTATCCCAACTGAGTTTCTCCCTTATAACTTTTTGTAAAAAGCAGCTCCACAGAAGTAAAGTAGAATTATGATTTATTTGCCACGCTCTAACAGAACACAAAGCCATGAAATGGTACAGATTTTAGAAATGAGACAAATATAAGAAATATAAGAAGCAAAATAGATCATAATGCATATGATTTCAAAAAACCTGGCCACAAACTAAAGCCTCTTTTTGGTCCAATTATATTAGCATCCTCCTTAAGGTAGTTGACCAAAGGAACCTTGAAATCTCTTCCTTTGTGTTGATACCAAGCACCGGTTTCCTCATTCTGCAATACATTAACAAGGCCTCTAAAATCAGAAAGAAGGAATAGATACTGAAAGGGAGGGAGGAAGTTTGGTCAAAAGGTTCTTTAGCTCAACCACATACTCAACAATAAGAATTAACATCTCCAACAGCTAACTGTATGAAATATAAACCTTGAGAACAAAATTAATTGCTGTAATATCACTGTTGGGTTTAAGCTCAATTTTGACTTCATGTAAAGTATCTTCTTCAGCAGAGGATGATAATTTCTTCATAGGTGTCTCTATTGCATAGTCCTGAAATTTTCACTTCACACTCAAACATTCTGCATGGCAATAATTAACATGGGCCATATGTGAGAGCACGAGAGGTCATGAAGCCGTGGTCTACCTTAATAGGAATAGATCCAGGTGGTATCATATCACGAGGAGGTTGATCCCATTCACTGCAGAGTCAAACTTACATTATAATCATATATCTTCATTGGATCACTAACATTAAGACTTAACTCATACCATGATGAAAAATATAAAGCACAATCACCACATATCTCAAAATTAAAATGAAAGCCAATTCAAACACTTGATACCTTCCAACATCATCCACACGGGAAACTCCCCAGTGAAAAATCCATTTCCCTGATAGATTGCAACCCACTGAAAGCTCCCAATTTCCCAAATCCTTCCCCTGATCCAATCTTACGAAGATCTTTCCCTCCACCTGCAGATTCCATCACAGTCAAACACAACAATCCCGTCAATGCCAAACAAACACCACACTATGTACATTAAATGACAAAAGAAAAAGAAAAAAGTCTTTTGAGTACTGTTAATTCCCCTTTTTCTTGCAAATACAAGTATCAAATTATTTGATACTTTTACAGTATTGCCATTCTGTTTGATTGCTCAGAAAACAAAAGAAAACATGACAACCCCAAAAAGTTAAACATCAACAACAACAATCAAGCTGATCCAAACTTTTCCACCTTGGGACTAAAAAAGTTCAAAACAAAATTCCATCACCCTTCAACTTCCCCACTATTTCCTCAAAAAAAATCCATAATTGCTCTTCTGGGTATTCCCAAAACTTTACATAAACCAAGTGACAAGACAAAAAAGAGACCAGTTCAGTTCGCTTGATGGGGAAAGTCTGATCAAACAAAACATCAGAGGACTGAAGAGACTCAAGGGTATCAGTGTTTGATGCAAAAGCCTCAAACTTTGGAGTGTGAAGCTTGTGGGATTTGCAAGAACTAGAGTTGTTGGAGTTGAAGAGGGTGAGGGAGGAAGAGGAAGAGAGAGAGAATGGCGTTGGCTTTGAACGGTGAATGGAAGGTTCTCTTTCTCTGGAGTGGCAGTGATTGAAGGTGAAGAGAGGGTTATAGGAAAGGGTGGTGGTGGAGATGCTCATGTTATGGTGGTTCCTTATGCAAGGAAATGGGAATGAAGAGATTGCAACAAACAGAGGTACAGAAGTGAAGAACAACGAGGTTTGTAATTGTATGATGTTTTGTTGGATTGCACCTAGTTGGAGGTGTGGACACAAATGTTTTTTCAAATTCAAGATTTATTATTGAGAATTAAGAATGATACTATAATATGCTACGTCTTCTTTTCAATAATTATCTCTTGGGATGGATGAGATTGATTTCTTTTCTTCTTTGATTGGAAGTAAAGGAAGGAACTGCATCACCGATCACCTCGATGAACCGAAACAACATTATTTTTTCAATCATCAAGTAGGTGTGATAAGTTAGAAGGAATGCTAATAAGTCACGTGAAAGATTTGGTTACCATCATAAAAGTTTATTTGGGTTAATATTAATTATCATTATCTGATGACTAGAATTTACTGTAATATTTGTAATTTTTCTTTTTATGGGAATTTAAATATGTCAAAATTTACCATCAATTATGGATGAATAATAACTCTCTGTAACGTGAAATGGGGATTGTCATATATAAATTAGGTTACGTTGTAATTTTCAAGTGTATTTGCATTTTTTTATAAAAGAAATTTTTTTACTTCTTCAAATTTTGTTCTCAATAACAAGATTTTATTTTAAATAGTTTCTTTTTTAAGGAGAAAACTTTTGTTTGATCTAGACAAAAAACAATAACAAAACTCATAGTTAAGAAAATTAATTTATATTATTAATTATCAAAATTATTATTGACTAATAAAAAATAAAATTGTCCGTGCCTTATGTAATTGTGAAGTGGTTTTTTCTTTTTTTACGGTAATTATGGGTGATTTTTGAGTGGTTAAAAGGTAAATAAGGAATAGCAAGTGTGTGCATAAATTGGGGCAAATTATCTTTATTAATAGGTATATATATTATCTAAAATAATTATTATGAGTTTATAAATTTATGATACATAATAATCAATTCAAGTCTAGTGTTAGAGTATTAGATATGTAACTATATTTTGAAGAAGATTTTACTATTTATAATAGTAAGGGTGTTTGTAGTATAATTTGGTGTAATTTTGAATCTAAAACTAGTTCAAATCAAACCATAAAATAAGTGTGGTGCGGTTTGGTTCGATTTAGATTAATTATAAAATTCAAACTAAATCAAATTAACCTTTTGCGATTTGGTTTAGTTTGATTTTGCGATTTAAATTTTGTGGTTTGGTTTAGTTTGATTTTGTGATTTAAAATTTTTATTATTAATTATTAAAAAATACATTGAAAAAATTTATTTTTAAAATTATATAAAAGTTTAATCACTTCCAACAAAACTAAAAGTAGCAACCATTAAAGTTAAAATATAAACAATTAATTCATTTAAACATTATATTCTAGTGGTTGTCGTAAAATTGTATCTAATAAAACATACACCACCACTTAATATGGCAAAGAGAACATTTTTTTTTATGGAATATACACCACCATTTATCTTTGTCATATTCTAAGAGAACAAAAAAAGTTATGTAATATGACATAAAGAACAATTTTTTTAGTTATCTTTTATGATGATTTTACACTATAACAATAAAAGAGAATGATAAAAAATTGTTTTTTTATGTTAAACAACACAATAATATAATTGTTATCAATGAGCTTCTAAAAACAATTATTTAATAGAACGATGACTATTCCCTTATGAACGTAAAACATTTTTCTTATAAGATAACAATTTTAATTATAAATATAGAGATATTTTTTATATATAGGATAAATTAAGAATTTTTTTAAGTATATACAAAAATTTCAATAAGTACAAAACATGATTTTTTTTATTTATTGAAAATAATTTTATAGATGTCAATGAAGAGCTCATTTGAAAATCCCATAGAAGTATAGTAAACATAAGTTGGGAGGAACATCTCTTTTGATATTTTAGGTCCCATTCGGAGTGATTTTGATTTTCTGGTTTTTTGTTTTAAAATGTATTTTAAAAACAAAAACTTGTTCGGAAAAAATTGTTTTGTTTTGGTTTTTTATTCACTTTCGAAATAGCTTTCACTCAATTTTAAAAACAATAAAATTTGGTTTTTGATTTCTGTTTCTATTTTTATTTAAGCTCATTACTTAACGTCGCTTGTTACCATTGACCATCACCTTTGACCGATGGTCACCGGCCTCCACCTCTGACCAGAAGTCACCAGCCACTACCTTTGTCCGACGGTCATCGGTCGTTACTTTTGACCAGTAGTCACCAGCCCCCACCTTCGATCAGCAGTCACCAGTTGTCACCTCTGATCGACGGTCACCGGTTGTCACCTTCGATCGATGGTCACCGATTACCATCTCCAACCGGCGATCACTAATTGTCACCTACAACTGACGATCATCGATCACCACCTATGACTGACGGTCACCGATCACCACCTACGATTGATGGTCATTGGTCGCCACCTCCGACTGACGGTCATTGGCCGCCACCCCTAACCAGCGGTCACCTGCCACCACCTCCGACCGAAGGTTACCAGCCGCCACCTCCGATTGAAGGTCACCGACCGCCACCTCCGACTAGCAATCATTGGCTGTCACCTTTAACCAACGGTCATTGGCCGTCACCTTCAACCAGCGATCACCGACTGCCACCTTCGATCACCGGCCACCCAACCGGTATATCCAATCACCAATCACAACCACCACCTTCGATCGCCAATCATCGACCACCACCTTCGATCGCCAATAACAGATCGTTATCGTCAACGACTGTCTCGATCGCTACCTCCAACTGGTGTTTTGGTTAAGATTTGAAAATAATGTTTTAAATTTAGAAACAAAAATAATGTTGTTTTTAAAATTTTGAAAACTTAAAACCAAAACTACCTTTTGTTTTTATAAATTTTAAAACCAAAAACCAAAAATCACCCCAAACAGAGCCTTAGATTATAATTTGAGTTAAATTTAGCCATAGGATTCGCAAACAAACACGAATGAAATATTTAATACAAAGAATATGATTTTGTATATACTAATACGACAAGTAAAGGGGGAAAAGATAGTATGTCATAACACTAATCATCAATGCACCAAAATTAGTTTGAAATTAATAAATAATTAAAATTCATGATAATAAAGGTAAATAAACTTGGGTTTTAATGTATTTTCTCACATATAATGTTAATAATCATTCATTTCTAACAAGCTGTTAAAATAATATTGTAATCTAAAAAAACTGTACACAAAATCACATTTGTCATTTTAAGAAGAATCATTTCAGATTCTAATTTTTATCCATTGTTTTCATGTTTTGATCGTCGATGTCTAATGAACTTTTTTCTATCACTATCTCTCCCACACCTTTGTAGACAGTACTACACCCCACAATTGAATGTCTTATGCACTTCAAAGAGGTTTCTGGGATAGAACCTTCTTTGATCTTGTTTCAAGCCTAGGTCAAAGGGATATGTCCTTATATGTGGTATAAAATCACTTGCTAAATAACTTGTAATTTTAGAAGCTATAGCCTAAGACTTCACCACATATTTCACCCTTGTTGTTTGTTCCACATTTTCGTGGAAAAATTCCTTCTAGTGCAATTTTTGTACAAACTTTGAATTTAGTAAACTTTAAGTAGACTTTATACAAACTTTATAAACTATTGATCACATTAATTGAAAACATTTACATTGACAAAAAATTACACTTTAAAGGTTATTAATACAGTGACCATTCCCAAATCTAAGTTCACTAAACTAGAATATATGTGTGTATGTGTATGTGATATCTACCTTATAATTTTGTAGTTAAAAGGTTGGTTCAGTGGTAAAATTCACATGAGTTGGAGAAGGAGAAAGGATAGTTGCAGGTTGAAATTTCTCCACTAACAAAATTAACATACTAATAACTGACATTTGTCTATTAAAAAGTTACAATTTTCTATCTATAGCACATCTAAAAGTTTGAGTCATCCATAGTTCATAACTTTTAGTGTAATAGACGATTCTATGAACAAAAGATATTTTTGCTTTAAAAGGTTATTTGTCTGAATAAAAATACTTGTAAAGCTTGAATAAATAGGTTGTAGAAGATTCCCCCTCCCCCTGTCCCCTACATAACTATAGAAGATTATATTGAACATACAAGTTGTAACTTGGAAAAGGAGTACACATAAAACTGTGTACAAGTTTAACTCTTAAAAATAACATGTGTAAGTGGTCTGATCCTATGCTGAAAAATATTATGTGAAGTATTTTGGATAAGATATGACTAAAAGAAAAATATATTGTTTATATTGAAAAATATTGCATGTAGGTTGATAACATTATTTTAAGAAAAGATGATAGGGCAGTGCAAGCAAAATAGGTGTAGTAACTCCTTGAGTACAAAAACTATATATAGGTTTATCACATTATTTTAGACTACCTTGTTTAATACTACGAGTCCTCATTTAATATCAATGAATATTAAATTGAGAATATACAAGTTTGACACCATGAAGTAAAATAGATATTACACCACTTGATACAATATTAAGACAATTTTTTAAATCAAATTTATATGACAACACATTCTTCAAAAAAAATTTGTCATAACTTCATTCCTTTACACAAAGAAAAAACCCCACCAAAATTGTTGCTACGTGCTTCTAAAACTTTATTATAAATTAATTTGTTGTTCTTAATTAAGCAATGCAACATATTTTATCATGTAGCATTTGTATCTCATTAACATCATAATTAAACTCATTAAACATAAAAAAATTATCAAATTGGTTCATATAAACCAAACATGGTGCAAAAAAGAATAAAAATTCTTCAAAGTTTTGCAATTAAAAATTAACAACTTTTCAATTTGTAATAAACAAAGACTCCCAAGTCATCATCTCCAATAATCAAATATGAAAAATCAATATTTATAGTTATTATTTAATGTTAAAATTTATAAATAATAAACAATAGCAACAAATAATAAAATATATATAATTATTAGATACATCTAGTGTATTTAAACATTTTCTTCTATCAATTGAGTGATTTTAGTAGCCAAATGATTTACAATGTTATGAAGGAATCACCTATATATGTTTTTAGGTCAATTTGTATTTTAATCTACTATCTATTCAAAATAGTTAATGTGAGTTATTAAAAATAAAATTATTCAAAAATATTATTCAATTGTCTTGTCAGATTCCCTTATGATTTCATAAGTTGTTAGGCTATTAAGCTAACTACTATGCTTTATTTAAGGTTGTTGCTTAAAGGTATAGACTAAAATCAAATAATAAATATCTTTAAAATAATAAAATAAAAATAAAAATTATAGGACCAGAAAAAAATGCCAAGGGCCAAAAGGTATTTATACCTAACCTTTAATAATATAATTTATTAAGTAGATGCTAATTACACTCCTCATCCTTATCTTAGACTTCCCCTTTTCTTTTTTCTCCAAAAATTACCCTTTCAAACATACACTCCCCATAATCTCTTTATGATTTCCATTGTACAAGAGAAAAAAATGCACTCCCTCTGTCAACAAATTTCCAATTACAAAATTTCAAAAATTGAAAAACAACAATTAAAGAAATAGATCTCTCATTATGTTGTAAATGGTGGCTTTCTTAACTCCTTATTCACTAGGTTCAAGTTTGGGTGAGTTTTTCCAGTGCTGTTAGTTGGGTTTGTGGAGTTTAATGTATGTAATTTTACTTTTATGTTATTTTGAAGAAACAATATATATTTTAATATTTATTTACAAAACTTTATGTTTATTATTTTATTTTCTATGTTTTGTAAAAAACAAAAAAAATCTAAAAATTGTCTTTGTAATATGTGGATCCAATCTGATTCATTCTTAATTAGATCAGATCACTATTTATTTTTTTTTTGTAAAACTAATCCAATCCAATCTAATTAAATTTGACTAGATCGAATTTCACTTTACCTTAAATACAATCCAATTGGATCCATGAATACTCTTAATTGTATGGTTTCGTATTTGTTACTATTCTAGAGGCAACAATAGTTTGTTATTGTATTTTTTCCCAGGACATCCCTTGTTCAAAAGCTAAAGACTCATGTCTCAAGATACAAATATCACTTAAAGTGTTGACTATTATAATAGATATTTATTTATTTTATTGTATTGGATGAAATTAGTGAGGCTACGAGGAATGAATGTGTAACTGGTTTTGGGAAATGTGTGCTTACAAGAGTATTATAAATAACAATTGTCAATTATTATTATTATCATTTTGCTCCATATGTGTTTTTGCTCCTTTATCCTTATATTGGCAACATTATATTACCAAATAATATAAATATCTAAGACTGAACTAAGACTTTTCTTCCTACACCTTCATATTTTTTCCTTGCATCCTATTTTACACCCTTTAGAATGATCAATCAAAAGCAAAAACACACCTCTGAAATAGGTTTGATAAGAAATCTCATAAATGCAAAGAAAAAATTGCCTATATTAATTAATCACTGGTTTCACTTAGTTGGATTTTTGCTGTTGGGCCAAATTAATGCCCCATAAGTCATAAATGTGATTTGAATGCATATGTAAGGAAAAATAAATCTATACACTAATACTTTATTCGGTTGCAAGGAAAGAAAAAAAAGTGTGAGGAAAGACAAAAAGGTAAAATATAGTGAAAATTGAATTTGTTTGGTTGTCTGGAAAGTGTTGTGAAATGATGGAAATTTACAAAATAAAGTTATTATTATTGGAATTGAAGGTTTGGAAAGCTTAAAAAAGTCTTTTTGGAAAGCTTGAAGAAGTCATTAATTTCTTCCGTGTTTTGGTTTTGTGTAGTTCATTGTTTTATTTTTAGTTTTGCTTTAATAAGTTTTATGGTATCAAACACATTTAATAGATCTGGTACTTGGATAGGGTGTTTAGATAGGCATGAGAAAGTGTTTGAACAACTTAGAGATACATTGTATAGGCTGAAGAGTGCTAAAAAATTATCAAAGTACATTTTGTGGTAAGGTAATCAATTACCTTATTATGGTAATTGATTATCCTTTGAGATTTTTGAGTACTTAGATTACCACTATCAGGAGTAATCGATTACTACTATCAGGAGTAATCGATTACCTACAAATAATAATCAATTATTCCAGAGACCATGCATTTTGGACCAGATTTGAAGCAAGATGTCAGGTAATCAAGTAGGTAATCGATTACCCTGTTGCAAAACTCATATAAAAACATTTTTTAAAACAAATTTTCAACCGTTTTTGGAAAACAAACGAAAGGTCCATTGAATGCTTGCAATTTCTAACGGGTTTCTCGCCTATGTTTTCACTAGTAATATATAAGGAGAATAAAACATTTTTGTGTTAACATTTTATGTTTATTTTACCATTCTAAACATTTTATGACTTCTTCCACATTAATAAACGCACATTTCACATGATCTACCTTTACCACAAATCAACATTCTTTAAACATTGTTAATACACTTTCAATCATAAATAGAAATGCGAATGCGCGCGTGTGTTTTTGCTAGTAATATATAATGGGAACATGACATATTAGTGTATACATTTTAGAATTATTTTACCTTTGTAAACATTTTATGACTTCGTTCACATTAATAAATGCATATCTTTACAAGTTCTACTTCCCACAAATTAACATTTATTAAATATTATTAATGTATGTATACATTTAATCATAAATATTTTTAATAGAAATGCGAATACACATGTGTGTAACAAGATGTTTAATTTTATTCAAACTTTTTTCTCTCACCATTTTTTCAAATTCATTAAAAATCTTATACATACGTTGATAACTGACGTGTTTCTATTATATTAACCTAAACAAAAACATACTAAATTAAAATTATTATACACAAAATAACACGGTTAATTATTTATATATTTTATTATATTATTAAAAAATATATTAAATTAAAATTTCAAAACTATTATACATATCAAAATAAAAATACAACTACCAAACTCTTACCTATCAAAAAGTTAAGTTTATAAAATTCACAAAAAGCTGTTTAGGTATTCAAGTTTAACAACCTTGAAGGAAAGTAATGTTATTTAATAATAAAATATTTCCTTGGCATAACAAATACAAATAAAATAAAATAAAAAAAAAGAAGAACATACATATGCTTCTATAGCTTACACGTAGTTACTACCTTCACAACTCATCTGACAATTAGAAAGAGAACCCAAAGGGGAACTCGCGCGAATATGCTCCCAGCTCAACTCTTGTCCCGATTCTCGAGGCAACTCTTCCTCTTCCTCTAAATCAACGGCCCCGATCTCATCTTCCCATCCAACGGCCTCAATCCATCCTCTTCCTCCACAATATTAGGGTTTCTCTTTTACTCTCCTCCTCTGTTACACTCGCTCCCATTTTCCCCCCTTTTCTGCTCTCGCGTTTTCCTCTTCAGTTTTTTCTCGGGAAAATCATGGTGAAAGGTCCAGGTCTCTACACTGACATCGGCAGAAGAGCTCGAGGTAACCGATTTTTGCTTTCGAATCTTTCGTTTTTCTTTACTTTTCTTGTTTTTCCCCCCATTTTAATGCGTTGATTTTCATGAATGTCTTACTCTTGCCGATGATTTCAACTTAGATCTTCTGTTCAAGGATTACCAGAATGACCACAAGTTCACCATTACCACTTACACTTCTACTGGAGTGGTAAGATTTTATTTGTCTTTGAAGCAGATTTTCATGATAATTTGACTTTGGAAAGCGCTTTTTTCTGATTTTTTATTTTCATTATTTTTTTGAGTTTTGTTGCATTTTGCCTAACGTTGGATTTAGAATGTTCGAGTTAGAAGCTTTGCTGATTGTTTTGTTAGATTATTTAGCAGTAATTAATGTGAATTTGAAAATGATTCAAGAAACTAGTTGAAATGTTTTCGTTGGAGATTGCTGTTAGCTAGCTTCAATTTTAGAAAACGTTTTGTTTTGTGTTTTTCGTATTTTTTATTTTCATTTTTTTTAGTTTTGTTGCATTTTGCCTGACAGCAGATTTAGAATGTTTGAGTTTGAAGCTTTGCTGATTTTTTTTGTTCGATTATTTTGCTGTAATAGATGTGAATTTGAAAATGATTCAAGAAACTGGTTGAAGTGTTTTCGTTGGAGATTGTTGTTAGCTAGCTTGGATTTTGGATTCATTTCGCGTAAGTGTTTAGGTTTTGTGTTCTGATGATTTCTGTTTCAATGGCTTTGTGTATTCAGGAAATCACTTCTACTGGAGTCAGGAAAGGTGAGATATATTTGGCCGATGTCAGCACTAAGGTGAAGAACAAGAACATCACTACTGATGTCAAAGTGGACACTAGCTCAAATGTGAGTTGAAATTTCTTGATGGGATAGTTTCTACTCATAACACTTGATATTTCTTTTTTTTGTCTGACGTAACTATAAGTTTTTTAATTTTATATGGGCACTATTTTTGCCTGGACCTCTTATCTATGATATATTTTTGGTTTGCAAATTTGTTAGTTGAGTTTTGCATGACTCTGCATGGTCATTATTTCTATGATATCTGCATCAGGAATCTGGATATCCTTTATAATTGAGTTGACTGAAGAGCTCATATGACATTTCTCATCTGACTGAATACTTTTCAGCTACGTACAACCATTACTGTGGATGAACCTGCACCTGGACTGAAGGCAATTTTTAGCTTTATTTTTCCAGATCAGAAATCTGGCAAGGTAAAAAGCAGTTTACCTTGCCCTATGTTGAAAATGTTTTTTTCATTATAGGTTTTCTGTTTTCTTTATGCAACTTAATGTTATTAATAATAATAATATTTCCAGTTATCCTGAATGATGATGTCATTCACTCATTATCTATTGTTTAATAGGTGGAACTCCAGTACCAGCATGAGTATGCTGGAATCAGCACCAGCATTGGTTTGACAGCAAATCCCATTGTTAACTTCTCTGGTGTGGTTGGAAATAATTCAGTCGCAGTTGGGACAGATCTTTCGTTTGATACTGCCTCTGGCAACTTTACCAAATATAATGCAGGGCTGAACATTACTCAAGCTGACCTCATTGCATCTCTAACTTTGTAAGTAGTTATCCTAGAGTATGATACCGTTTGGCGCAGTTTATTTTTGGTTTAAAAGTTACTTTTAAGGAGAAGCTGATCCAAACAGTATTTACACTTAAACTTTTAAGAAGTTTATTTTACAGTGTAAATTTTTATGTTATAAATGTTTTCTCTCTAGACAGTAAAGAAAATTTATCAACAACTTTTAATATAAAAGAAGTTTTTAAGCTAAAAAATGAAATTTGACAAACAATTCTAAGTTAAAAATAAGCTTGGCCAATCGTGACTTATATATAGCATATATCCACCAATTTTAGTGAGGGTTATTTATGTAGTGTATTCAGCTAAAGTTGGTCTCTTAATTCATCTGTTCCTTTTTCTTAATGTAGAAACGATAAAGGCGACACTCTTAATGCCTCGTATTACCACATTGTAAACCCACTGTCCAACACTGCTGTTGGGGCAGAGCTATCACACAGCTTTTCTAGTAATGAAAATATACTCACCATTGGTACACAGCATGCTATGGACCCATTGACCCTGTTGAAAGCTCGCGTGAACAACTACGGTCGTGCAAGTGCTCTTATCCAGCATGACTGGACTCCAAGAACTCGTTTCTCTCTTGTTGGTGAGGTGGACACTGGAGCCATAGGAAAGAGTGCAAAGGTTGGTCTTGCTGTGGCCCTCAAACCTTAACTTGTAGTTTTGTGAGTGATATAGGCTACGCCTCCAGTGGTGGAGGTAATAAGTAGTTGTTTAGGGTTTCACTTTCCCAATGAACATTTAGTTCTTCATTTTGGAGCTATATCCATTTCTTTATATCTTGGTGGGTTCGATTGTAAAATCAATAAGCACAAACAAATTTTAATTTGTACTTATTCAACCCGAATGTCATTTTGATTTAGGTGCACCTATGTAAGTTTTTTTGAGCATGGAAGGTGATTGATCTGCGATATGATTGTTTTGGGGTGTATATGGAAGCTTTGGTTTAGATGCCTAGTAAAAATATTTGGTTCAATTTATTTGGTAATATTTTTAGTATGTTTTGTCTTGTTCGAAAGTGAATATCCAGCTTTTTATTTATTAATCTACATAAGTGAATATCCATTTTCATTTTTATATAAATATTTGGTAATATTTATTTGGTAACATTTAGAGTGGAAGATTTGCTTGTCAACACTTTCTTCCATTCGAAGGTGCGAACATCCATTTTGGTTGGAGGAACAAATACAATGTACTCCCTGTAGGGAAAAACAAAACCTGATTTTACCTATGAAGAATGTTAATTAGAAATTTAATATTAATAATCTTATGAGAAAGCTTTTGATTTTTTCTTTACATTAGTATATTAGACTCTAGTTAAAACTGTTAAGTAAAGATTATTTTATTTTGGAGATATTTGAAATTTGCATATATGTTAGTATATATAATAGAGTTTAATTGGTATAAACTGTCAGGGTAAATTCACCAAATCATGACTTTTTATTTATGTGATTTTTAAAGTAGTAATAAGTAAAGTTATCAAATCTATCGTGAATAAAAGATTGTGATTGAATGTCGATGTAAGAAAACAAACAAAAGCTACATGTGAAATTTGGATTTTGAAAAAAATTAGGGTTTGATTAATTTGTTTTTTTAGTTTTTGGAAAGAGTTTTTAAAAATAGTTTTAAAAATTTTTTTTGGAAAAAAAGAAAAATCTAAGTGTTATTTAAAAACTGTTTTGAATATGTAAAAATAAAAAACTTGTTTATATTTATTAAATTTTAAAAATAAAAACAAAAAATAACATATTTTTAGTTTTCAAAATAAAAATTAGAAACTAAAAAACAAAATTACTTTTAAAAACTAAAAAAATTATAATATCAAAAAACATTATTCATACGAGAATAGATTTTAAATACTAAAATAATGAAAATAGTTTTATAAAGTCAACCAAACACTTAGCTTTTTGGTATGAAAATTATATTTAAAAATTTTTAACAGTTTCTTTTTCAGTTTTTTGATAATATTAAATTATGGAAAAATTATAATTCAATAATTTATAATTGAGTATGTCATAATTGATTATAATTAAATTAATTTTTTTTGGAAAATTACTTTGAAATTAGTTTGAAAATAAATTAACTTGTTTTGGTGTAACAAAAAAAAGTTTTGATAAAGTAGAAAGTAAAATAGTGTGAAATAAGTGAAAAAAAAATGTTTTTTTAGTTCAATTTTTTATAAATTAAAGTAAAAAATTTCTGGGGATTGGCTTTTTCCACCTGTTATATTTCTTATATGACCCACCAAATTTAATAAAATTTTTAAAATTTTCAAATTGTCCTTACTGCATTTTAACCTAGGAAAATGATATTAACCTATATTTCACCGCAAGTGCCCTCCAAACACCCTTCATTTTTTATTTTTTATTTTTAAATAGCACTGGATCAATTGATCCAAGATAGGTTAGAATTTTTCATATTTAAAGCAATTGATCCTGTTTTTTTTTTTTTTTTTTAAAGATGAAGCATGTTTTGAATCAAAATCATTAGATGATCCAATGTTAAGCATGAAAGGAGGGCCTAATCCAAAAGATTAATTTATTAGGTGGGAGAATCCTAATGCTTAAATACCATATTAGGTAGTCTGAGTCACCCAATATGGGATTCCTAACATTGTCACCAATTTTAAGATCGACATCCACAACATTTAATTCTACTGTGGCTAACATTGCCACTCTGTTTGAGGGCTGATATACACGACAACTTTTACTCTATCAACATTAATCCAATGATAACCTTTTTCAATTTTGACGGTTTCACTCTTTTATTAGTATTTAGAAAATTTCCCTTGTACCCCTATAAGTTATTCTTATAACTCCATAAATTTTTAAAATGGAAAAAAGGTCATTAATGAAAATAGTAAAAATTTAATACAAGGTGCTTCGTTCTCTTCCTTTTTCATCTGTATCTCTCTCATTTGCTTCTCTCGCACGACTTCATTTTTCTTCTCACTGAATCAATGACTTTCTCTTCTTCTTCGTGTACTTAATATTCATCTCCTTGGCATTTGCTTTGTTCTCGTGCTTCAGATTTGCGTTTATCTTCTTTTGGTAGATTATGGAAGCAGGTTTTTTGCAAAATTGTTTACAAGTTTGGACACCCCTATCCAACTTGTCAAATTCGAACACCCGTGTCTGGATTTGTAAAAATACCTAGGATTAAACTTATTTTTTATCAAGGGGTATTTAAGATTTTTTCTACATTAATGGAGGTGCAGAGAGAAGTCATGGGGGTGCAGGGTGCAATTCCTCTAGTATTCGTTTAACACCTTAAATTCAACCAATAGGTAGCCATTTTCATGACCCAACTCTCAATGAAAGTACCAATTGTTAGAACTTAAGCAAAGCAAGAGAGTCCAACCCAAAAGGTTGGTCTATTGGGAGCTCCAATAGTGTGAGTTACCCAATGTGAGACTCCTAACATTAGATCCTTGAAATTTTCATGACATTGTCTATATCAACACAAAAAGAACTTCCAGATCATATTTTGGATTGAGAAAAATATTTTGTGACTTTCGGATCACATGATAAGGTAATGTTATCCACTCTCCTACATAATAGACTTCTAGATCACATTACTTGATGTGGTACTTAAATATTAAAATTTTCTAAAAATTATTCTTTTAAGTTGGACTCTTCTCTTATATTTAAGTCAATTGGTATTTTTAGTTCACATCTAGTAGTGTTATCCACTTTCAACACTAATCAGATTAATTAACAAATGAAAAAAAACATGTCTCTCAACTCTTGTGCCAAATTCAACTATAATACTGTTATCTCAAACTCTAAACAATCTAACATATACCACAAAAAAAAATGCGACCTTACCTAGAGTAGAAGTGCATCAATTTCTGTCATTGGCATTGTCCTTTTTCCTTGACAATAAGGACAGGGCACAAAGCATTGTGAGCACAGTAGTTGCTAATACTTCCGGATCATGTGATTAGTTGGTCACATAAATCATATTTTATAATTTGGATTATGTAATCCAGAATTTACATAATTTTTTAATCCGGATAACATGATTGGGAAATTCCTTTTACATTCATTCAGACGATATCATCCAGAATTTTCAGGGACTCAGAATTATTTGACTATGTTTTATTTTAGAAAAAAATTCTGGAACAATTGATTTAAAATATAAAAAAATTCTAGCTATTTCAGAGCCTACCTTTTCAAAAAAAAAAAAAAAAGAAACAAAGGAAGCTTGAAGAGTAGGTGCAACACAATATGAATTAAGGTAAAACTTGACTTAGGTTAAAATGTAGCAAGGATAATTTGGATATTTTTAAAATTTAATTAAATTTTATAGGTGGTAAAAAAACAAATCCCTAATTTTGATAGTTGGACATAGGACAAGGTCAAGGGACATACTTAACATCTATGCAAAAAAAAAAAAGAAGCACAAACCATAAGTGAAGCAAATTCGAACCATTTATCTTTAATTCAAAAGAGAAGAGAATAGTATATTAAGCAACATTTTTTATTCTTGAAAAATAATGATTTTTGGTTTTCATCCTTTAAAGATTTTTTCTTAATTAGATTCTTTAAATATTTTTTGTTTGATTTTAATCTCAAACAACAATTTTGTTAATTAAATGACTTTTGCAATTGCGTAACTTAACATGTTATCAAAAGAGTCTAAAAAGGATAGTCCTAAATAATTTTTTAGGAAAAATTGTATTTTTAATATCTTATTTATTATCATTGCATTGCAGACCTCATTACTCATTACATATAAGTTAACGTTTCTTGAAAGTAAGAATTAAAACCAAACAAAAAATCCTTAAAGGACCATATTCAAAACAAACAATTCAGAGGACCAAAATAAAAATAGTGTATTTTTAAGAGACCAAAAAGTTCATTGAGCCTAATTATTCACAACTCAGAAAAACATCAATAGAAAATGGATAAGGAAAGGCATATCAACATACCAAATTAGTTCAAACTAGGCAGACAAAAATCAAAATGTATATATAGTAAGACTTTGGAAGATAGATTCCTATAGAGCTAGTAATGTGATGTGTGATTTCAAGACTTAGCCAAATTTCCTTGAAGAAGACCATCTCTAAATTGTGAGGCGATATCTCTCACAGCCCCTGGTCCGTGTGGAACAAAAACAGAATTGGATTTTGAGGATGCACCAATCTCCTTCAATGTGTCAAAGTATTGGGTCACCAAAACCATGTCCATGACATCCTTAGATGATGTTCCAGGGACATTCTCTGAGAAGGCTAGCACACTGTCCCTCAGACCATCTACTATGGCTTGACGCTGACGAGCAATTCCAAGCCCTGATAGATACTTTGATTCAGCATCTCCTTCTGCCCTTTTTATCTGCAGAATCTTCTCAGCTTCAGCTTTCTCATTTGCAGCCACTCTCATTCTTGCAGCTAAGCACATGGTAAAGAAAAAAGAAAAGAAAATGTCAGGCTATAATAAGAATTTACTCAAACCAAGACCTAAGCTAATGATGTTGTTGGGACAAAAACAGATAAACAACAAACTTCTCTTTATTCATCTTTAAAAAAAAAAAAACACGTAAGTAAAAAGAATAACGTTATTTTATTCACTTGGTTCGCTCTCTCATGCCTATATGATAACAAGTTTTTAGGACTACAAAAAACCTATAGACCCTCTTTTCACATAATTACTCCTCTTCGGATTAAGTGATTATTCTTATCTTAGAATTTTTTTTATAAACCTAATATCTTAGTCTTAAATGAGTAAACAAATATTTAATTTACAAATAATATCTTTAAAAAATCAAAACAAATCTTAAGGATAAAATAATATGCTTCCCCAAACAATATCTAAAAACTTGAAATTTTGAATTATTTTTCCAACACATGTTTATCAAGTGAAATAAAGGTTGTGAATTTGAAGGAACATTGATACAGATACAATTTGTTCTCTACGCTAGAAATTTGTGTCTTACCAAATCAGGTTAATGAAATATCTGTAAATGAATATTCCTTACATTGTACATGTATGAAGAAGGTAAGAGCTTGGCCAAAAATATACTAAGCAAATGCATAATAAAGCATACCAGCATTTATCTCATTCATGGCTCTCTTCACACGCTCATCTGGTTCAATATCCACAATAAGAGTTTGGACTATCTCATATCCATAAGCAGACATTGCCTTCATATGCACAAGTTAAAAACCAAACGTTATGGATGCTAACCCTTTTGTCCTCAACACACATACACTAAAGGCAATCACCTTTTCAAGTTCTTCCTCAACAGCTTTTGCAATTTCCTTCTTCTGCTCAAAGGAGGAATCTAGATCCATCTTTGGGACACATGCTCGTATAACTGAAACAACAATAGGAATCTATCATTTTTTTCCTGAATAAGTATCCAAAAAACCCAACTTTTATACAGGAGTTTGTTAAGGTTGCAAATCAACACCATCAAAGACATAGGCTTGAATCTGTTCCCTGGTATTGCTAAGCTTGTAAAAAGCATCCACCACCTTTTCTGCCATGGCACGATATTGGATAGAAGCAACAACAGTGACAAACACATTGTCCTGATGGTATGTAATAAGATAGAATAAGCATACAAATCATGAAAAATAAAGGCATGTTTGTTGAACAACTAATGGCCTATTTGAATATAAGCTAGAAGAACTTTTTAGAGCTTCTCTACCAGACATATGGAACTTTTTCCATTAGAGAAACTCTTAAACACTCTTCTAGCTTTGTATTCAAAGAAACTCTTAATTGAGCATACATTTAATAAGACCTCATTGCATAAGAATGCATTCATAACCTTTACTCAAATAAGCTAAAAGAAACTTATAGAAACACCATAAGATCAAGAAGTAAGAAGTTTTTACACTATTACTATAATCCTTGGGAAACTAAAGGTAATTGTTATAAAAGTTAACAAATTTACAGTACATGACAATATGATAGATGATAGTATACATTTTAATTAAATTATAAGATTAAAGACACTGTAAAGCTAATCATATTGATTGTGTTGGTTATGCAATTTAGTTTTTGAGAAGAAACCTTTGTCTTGGTTTCACACCGAACATCTAGCTGTTGCACCCGCAAAGAAAGGTAACCAGCCACTTGAGTGCCAAAGAACCAAGGAACACAGTGGAAACCAGGTTCAAGCACAGCATCATATTTGCCAAAAACTTCTTTGATAGCTACCGTTGATTGCTCCACTTGAAGACAACCCAAAGCCAGTCCCATCTTTATTCTTTAAGAAGCCTGAACAACAAATTGTCAAAAAATAAAATCAAATACTCCATTTGAACTCAAATATGAGAAGGAAAAAAGGTTTTGTCAAGTTTCCTAGACAAATATAAACAAGTTTCAGTTAATTCAATTCTATTTAATACATGTTTAGATTTAAGTTAAAAATATTGAACATGTGTTCCAATGCAAATCCAACTGATAAAAGTAAAAATAAAAGTAAAAGTAAAAAAGAATAAAATTATCATGATGATTTGACAAAATTACTTTTGCCTCAATCTTAAGTTTTAACCTAAAAACTAAAAATGGGCTTAATGTTAATATTAAAAAATACCTTTAGGTTCAAATTTGAACACCATCTCCCATAAATATGATAAGGATAGTTTATAAAATGTAATTCTTTCTTTGTATGGACCGGAAAGTATTAAAATTAAAATGCATTTAACTATCATTCTTAGCTCTTAATTCTTAATTGGTGCTATTTTTAATCATAGTTAACGATACCCGATTTTGAATTAGATTGATTTTAAGATAACGAGATTTATGCTTAGATCTTTTATTATAAAAGCAAGTTTAGTGTATAATTTATGAAACCCAGAATCAATTTTGAACTAAGAATCAATTCTAAATTTTTATTTTCAGCGCGAAACCAAACATGTCAAAATCTCCCTAAAATCAATTTTAAGTCTAAAATCAATCCGAAGGGGAAACCAGGCACTAAAATAAAACCTAACAGGACATGAGACATGTTGTTATATTAATATAAACGGTTTTCTCAAATAAGAAAGTGTGCTATGAATTGAGACCTAACCGAAAGAGGGAAAACACAATACTAATGGTAATGATGATATGTGACCAAAATCCAAATCCAAAGAAATTTATGAATTTAAAAGGCAGCGAAGAAAAGAAGAGAGAAAAAAGGTTTGTTACCTGAAAGGTAGAGAGGAAAGGAAAAGGAGTGGGAGAAACGGTGTAGTTTTATGGGTCTGTGTTCAGAGCAACGCAACATTTGCCATTGGAATTGACATATGTATCTTCCTTTGTTTGTTTTAGGAGCATGCAAGGGATATATGACCCCACATTTATAAACCTTATAACCTACAACCGACAGAAAATGTTTTTTTTTTTCTTTTTTAAGTTTTTAATATATTATTGAATTAATCAATTTTAATAAAAATATTATATATAATTTAAATGATATAAATATTTTTTATATTTCATCTTAATACTATTTTTATAAAAAATAGATTTGATACGAAGATATCATGTGGAATTTCGATAATATTACTTTATCTTTTCTGTTTAATCTTATAAATGCTATTTAAACATTGGAGAAAAATAAATATAAAATAATATATTAATTTTGTTAAAATAAAGTAAAATAAAAAATAATAATTAAATGAGAATCAATTATATAATTAAAAGTTAAACTATTACGAATATTATATGAAAAATAAATTGATTTAAAATAAATATTACTTTTAAAATAAAAATAAGATAAAGTTAAAAAAATATTTTATCCCACTTTAAATCTTATATAAAAAAAGAAGAATTACAATATTGTACTCATAAGGTTAGTGCTCTCAAAGGTTGAGGAGAAAGAAAAGGAAATGAGCAAAAAAAATAAATTAAAGTTATAAAATTGTGAATTAGATGTTGGAACCTGATTAATTTGTTATTGCTTATTTACCTTGTGATTACTTCTATTCCAATTGATTTCTCACTTCCTTGCATATAGTATTATTAATTATTAACTTTGTGTACATGATAATAGTTTATAATTAATAAAATCAATAAATTTATTATATATAACTAAATGTAAGTGTTAATTGTTTTACACTAAAAATGTATAAATTTTTTTGTTGAACTTTGTATTGTATCATACATATATTTTCAAATGGAATTTTGTAAATTGAAAATGAAAATCAAAGAAGCGCGTAAAACCAAAAAAGAGTGACATTGAGTCATCGTTACTGTATTTAATATAAATTTATGTGTATTCATGAGTGTTAATTAAAAATTACATTTTATCGCGCAATTGTTATTATTATTAAAAATTATTTTAAATTATATTTTTATATGTATAAACATTTTTATATTATTTGTAGTATTATGATTGAATTTTTCGGAATTTAATACCGATTTGATAATAATATTATTTGCAAACTTTTTATAAATTATTATATTAATTTAGAATATTATCTCGTAAAGTTTTTTTTTATGAAATGAGAAATAAGTTTTGGAAATTAAGTGGTTCTGAAAATTTAGTTTCTTTATTATTTTATTATTTAATTTTTTCTTTTAATATTGATTAGTAAATATTTTATTTACCATATTTTAATATCATCCAAGTATTTTGGACTTTTTATCTTGTAAATTTTGTGTTTTTTTCAACTATCTTTTACTTATTTTATTATGAGTTGTTATGATAATGAATAAAGTTATAAATTACATGTATATTTTAAAAGAATAAAAATTACATAATTATGTTTACTTTTTATATTAATATTAATTTTTGAAATATTTTTTAAGCATTTTTTTTGGAAGAAATATTTTTTAAATATTTATTTACTAAAAATGATTATAACAATCAAGTTAAAAATTTTAAAAAATAAAAAGATAACAAAAAAATAAAAAGATAACAACCAATATATATTTAAAAATATTATATAAATATTTATTTCCTAAAAAGGGAACAAATAATTATTACAATAGAAGAGTGAGTACTTGCATAAAATTTCAAATGACAATAATCTAATGTGCTCTAAAAATTGTAAAAGTAATCTGTTACAAATCATAGTGATACTAATTTTTTGGGAAGTTATTATTAAAATCAATAGATTTGTCAAAAGATTTTTACGCTTTTAGTGTTTTACTCATTTTTCTTGTTTTAATATGAATACTTAATTATACATTTTATTTCTTATTTTACTAAATCTGTAAATGTTGATGGTTAAAAATCAACATTGACCTTTACTGTCATGTAATTAACAGTTTAATAATTATATAATATATAATATTTAATTTTTAAATTGGAAAAAATTAATAAGTTGAAAATTAATTTTAATCGTCACATCAAAGTCATGCTACTAGACCAAAAGTCAATATTAATTTTTTTGTGAGATTCATATTTAATTAAACTAATCATGTGACAACATTAATTTTATATTAAAATTGGACAAAGTAAAATTTGAACCTAAGACTTATGAGAGTTATAAGACCATACCACTAAATAGTAAGCCAATTTTGGTTTTATTGTCTCTTTTTCTTTGTTTTGTTTTACTATTCTTGTTCATTTATGTTGTAAATTTTTTAAATAAAGAAATTTTTTTAAATTCTAAAAACTACTTAGCTTGATTTTATGTTAAATTTATTTGAATAATTTTATTTTTTTAATTTTTAATTTTATATTTAAGTTTTAGTTGTTACTTTAATTTATAGTTTTTAACTTTTAGTTTAAATTTTAATTTCTATCTTTTATTTTTAATTATATTTTATATTTTATTTGTATATTTTAATTTTAAATCTATTGTAGGTCATTTTATGTTATATATTTTATTTGTGATTTTGAAACTAAAATTAACAATTAAAAGATGAAATTAAAATTTAAGGGTTAACAACTAAAACTAAAATTTAGTTATATTAACAACAATGTAAAATTTAAAATCTAAGTAAAAATAAAGACATAAATTAAAATTGAAAATTAAAATTTAAAATTAAAATTTCTCCATTTAAAAAAGTTGTAAATTTTAATATATTTTTAAAATTAATCTTACCACGATTAGTTTAATTAAATTTGAATCTAAAAAAAAATTAATATTGAGGACACAAATGAGTTATTCCTAAATAAAGGGACCCGATAGTAATTTAGTCATAATATTTTAAGAAAAAACTTTAGTGAGTATTAGATTAGAGATAAAATTTACCAAATTGATGGTTTCACCAAGAAGACTGTTAAAATAAGAAAAAAATTCACTAACATTTCTCATACTTTTAGTTTAACATTTGGGGTAAATTACTAATTTTTAAAAATAGAGAAAAAGACTGTCCCAATTTAAAAATAAGAATAAAATCCTATAAATTTGTTAAAATAGAGAGAAAAAAGATATATAATTAAGCCTAATGTTAGTTTTAAAATTTAGTTCTTTTCTTATTCTCGGAGGTGTCTCTTTCACTCTCAGCAACTTTATCTCTCTTCCCCAGTTTCCCTCTTTCCACGGCGGCGATTCATTCTCCCTCCGCTGCGTCTTCTCCGGTTGTCTTCTTCCTCCTCCGACACCAGATCTTTCCTCCACTGCTCCATTTTATGTAAAGTCCTCATCTTTTTTTATGCTTTTGTTGATTTTAAGAGGGATTTCTCGAAATATATAAATAGATTCATCACTGACTCGCGAATCCTCACCAAGTTAGCGACTCAGTGAACCCCAATTTTTGAACAAAACGACATCTTGAAGTGTCGTTTCAAGGTTGGGATTAGGGGAATCTATCCGATTTGTGCTTTGTGCTGCTGTGTGTTGTTTTGGGTCTGCAGGTATCTGTGTGTGATTTTTAACACAGAAAATCCCCTTAGGGTTTGTTTGGATCTCCAAAAGCACTTTTAGGGTAAAAATAAAGTTTATTTGTAAAACAAAAATATTTTTTATTAAAAATTATATGAGAAAACTTTATGTGTTAGATTATGATAACTTAATTTTAGTATATGGAGAAGTTTTTTTTGTTAATTTTTTCTTTGGATTTTTGTAAGTAGCAGTTTCTACTGAAACTCTGAAAGTTCATTCATTTTCTTTTTCTTATAAGAAAGCTTACCCAAATAGACTAGTCTTTTGCTATTGTAGTTTGTTAAATTTGTTATTTTTTATGATTTTTTAGTTATTTAGATTTTATTATTTTAAGTATTTATTTATGTTTTATTTGGTGTTTATAGAAAAATAAAAATGTAGAGGCTTTTTTTTTTTTGTATTTTCTTTTCTTATAAGTGTCGTGATTCTAGTGAAGTTCACCGGTTTAATTTTGTTAAAATTTGTTATTTTTAATGTTTTTTAAGTTATTTAAACTACGCTGGCTGGGAAACAAAAATAGTTTTAATGTCTTATATATTTTATTTATATCAATTACATTCTCAACGAATTTATAATGATTGAACTAACACTAAAAAGGAAATAAAGGTAAATAAAATAAATTTAATAACCTTAAAATATTTTTTCTTAATATCTAAAGATTATTTCCAACAGTTTTGAGAATTTTTGTTTTGTATGGACTTATATGTTTTATTTGGTGTTTATAGAAAATTACAAATGGATTCATCCCAAAGCACAGCTCTGGGAGGCAATGGTGGAAATGGGACATTGGTTTCTCAAACTAATGACATGGCAGCTTCTGCAGCAGGAGCTGATGATTCTATGCAGAAGCTGAACCAGGTCAGCAATTCCATTCAGAAAACTTTGGGTCTTATTCATCAGCTTTACCTCACAGTTTCTACATTCAATGCTGCTTTTCAAATGCCTCTTCTCCAACGCATGTATTTCTCTGATCCTTTTGTTGTAATGCTTATTTTGCTTCACGTTCAAAATTCATAATATTTTACTTTAAATGTTCCAGTAATGGCCTTGTTGTGGAGCTTGACAACATGGTTAAATTGGCAGAGAAGTGCAACATTCAGGTTCCTATGGAGGTTGTCAAGTGAGTTATTTGCTTTTGTATATGCTCCTATAATTTTCGTATTACCTAATGTAAGTTTTTTTTTTTAAGTTTTCTCATTTCAAGTTAATTGTTGGCTTTAGTTTAATTGATGATGGGAAGAATCCAGATGAATTTACCAAAGATGTTATAAACAGCTGTATTGCAAAGAATCAGATCACCAAAGGCAAAACTGATGCTTTAAAGGTCTTTTTTTTATTCTTGATTTTTATTACACTTGAATTTCCATCTGTTTTCCCATATATTTTATAAGCAGCTTTAGTCCAACTTAGTATTTCTGTTTTGGCAGAGTTTGCGGAAACATCTTTTGGAGGAATTGGAGCAGAACTTCCCTGATGAGGTTGAAACTTTTAGAGAGAGTCGTGCTGCAGCAGCTGCTGTAAGTATTGCTTATTTGGACTTTTATTTCATTGTGGAACTGAGCTTTAAAAAAAATTTCTGTCATTTGTTTGCTCTTAGTTAATTGTAGGATCTTTCAATCTCATGCTAGTAGTATTTTTAACTATTCTACTCTTCTTTGCTTAACTGATAATGGAAACAAACAAACAATATCAATCTGGAGAGATGAAAAATACAGATATAACTCTAAAGAAACTGAAATTGAAAGAAAATACAGAAAAAGCACAATGCAGCTCTTAAAGGGTTTACTAGCATTATGCCCTCAAATTGTCCTTATCTTTCCTCTCTCCACTTCTAACAATTTTCTCTATCAGATCATACCTTCCTCAAGCATCCCTTGTGATAATTCTGTTATTGATTAATCCATACTATATATGTACTTATTTGGTGTCTTATGGCTGTCATTCTACGTATCTAACAAGTTCACTTTTGAGGCTCACCTTCAATTACTGCCAAAGATACCAAATAATCAGCCGAGAGAGTCCTTCTTAGTTTAGGAAGAATTTCATAACATTATTTTTTAATGCTATCTACTCCAAGAAACCAATTATTAGGTTCTTTGATGATCCTTATCCTATCCTTTCCTGTTCAAAGAAGAATTCTTATAAAACAACCAATCCCACTCAATTTAAATACCTTACCTGGGTTTAGTTTCTGATGCACTTTTTCCATTGTATATTACATTGGTTAATTCAGTAGTACAGTATTGTAAATGACAGCTTGGAAAGTGACGACATAAAAGCTGAATTCTATGTTCAACTCGCTAACACTCTTTTAATAAGCACACTCCTTTTTATTGGTCCACCTCATCTAAGTTTTTAAACACGATACCTGTTTAGCGGTTCTATATGTTTAGCCATTTTATTATTTTTATTAGGAGTTTAGGACCCATGCGCTCATTGACACTTATTGCCTTTTCCATCTCTCAAAGGTTTTCATGCTGCAACCTTTACAGCAAAATGAATTTGTGAGCTCTGCTTCAAACACGATATGCTTATCTCATTAACAATTCCTTTCATGTGATTGTAGGCCTCAAATTCCTTTTCCTCATTTTCTACCTGCTTCTTACCCTTACTTTCCTTGCATTAACACCTCCATCACCATTCAATGGAACCATTTCACCCTCCTTATGATGGTTTTAAAACAGACCATCTAGGGAGAATACATCATTAAAATATTGTCTATGCCCAGCAACCTGTTTCACACATCAAGAAATGAGGTGTGATTCAAGCTTGAGGGAAGTGGCTCGGTCAACATCATTAGAAACAAAGTATAGAATCAAAGTTTTGAGAATACTTTTGATTTCACATCACCAACTCATTTTTCTATTGTCTCAATTTACTTTTGTGGGGCAATTTGAACGTGCAATTTTTTCTTGATATACAGGGCCTAATTAAAAGTGAAAAGGGGAAAGTCTTTTAGCAGGTTTTTAGTACCTTGTGAGTTGGTCCTTTTGACTAGAAGTTGCGGTTATAGAATTATTTTGGTTTAGATTGGATGTTGATCTTTTACAGGGAGATAGTTAAATTGTGTCCTTACAGATTTGAGTTGGCACTCAAGTACTTCATTGTACATAGGTTAGAGAAATTATTCACGGTTTAAGTGCAGCACCAATTAAGTGAAGTAACTACAATGAAGTTTTTTGAGTCAAATTCATGGTCGCTAAAAGGCCATTCATGCTACTGTTACTACTTACTACAATGAATATGACAAGATTGATAATGAATGTGGTTAACAATTAAGCACAAACTAAGATCCAATGCTCCATTGTATTAAATTAACCAGATTTATGGATGGTCCTAGTTACAAATTGTGGAGCATGGACAGTTGCGGGTAGGGGTCTGATGGAGGACTAAGGTGGGGGAAAAATTAAAAGGGAAAGAAGACAGAGAGGGCATAGTTGAAGTTGTAGTTGTACTACTTTCTTATTCATGGTGTATCCATGAATCCACGATGCCTAAACTTAATTAGATACCTTAAACTAATTAAATTGTTAATTGTCTTTCTGTATATAGGGTGAGCTCTTTTAAATATATATTTTAACCAACAGTGGTCATATTGAATGAAATACAAGATTGAAACTCTTTTCTGTACTGTAATCTTACAGCAGAGGCATCAGAAGCTGTATAAAAATACTTACTACAACAATATGCAATTCCTTAAAGGGAAATAAATGGCCTGTAATCTTTTTACAGCAGAGGTATAAGAATATAAAATACTTAATGGCTTAATGCAACAATATGAAATTACTTTGAGGAAAAAGATAGCCTATAATCATTTTACTTCTGAGGCTTCAGAAACAATATAAAAATACTCAATGCAACAATGTGAAATTACTCAAAGGAAAAAACTAGCCTTTCATCATCTGGTCTTTACCAAACTCCACCTCTTACATTTTAAAATGAATATCTTGATCTATAATTAAGCTCAAACAAAGTTTTGAAAACAAAAATCCCATGAAGTTTTAAAAGCATCTTGTCTAATCCTCTTGACTTCCCAAACTCCACTGCTTTACTTGCAAAATGTGAGAAAGATATGTGGAAAAACACATAATAAAACTTTGCAAGGAATGAATTGGCGTTTTGTACCACTCTTTGTGTAGTCACCCCTTCATTATTGAGAGCATTAAATGCTTTACTTGTTTCTGTTTGAACAATTCTAAACTTCAATATCATTGATCACATACAAATGCTTCTCTCTCGAATCCTGTTCCATTTTTTCTCTATACCTATTTGTATAAAGAGAAAATATTGGCAATACACTTTGACACATTTCTCTTAATACACTCTCTATCATAGCATCACCCCTTCCCTAGACTTTTTGGTGTAAGTTCTCATCAAGATCGCCACCTTGGGCAACATTCTCTATATGTTGTACGATTATCTTGTCATTGATGGCTTCTAAATTGAGTACTACATTAGCATACCATAATAGTTAATAGCGCGCGATAGCATCGCTAACGCGATGGAGCGGAGTGTCGTGGCCACCCATCGCTCCAAAAGGTTCTGTCATGTCACGCCTGGCTGTCACAGTGGTTGTGTCACGTTTCGTAGTTGTTCCAATAGCAAATTGCAAACTTTTGCAGTGCACCTTGCCTGCGATTAAGATTTGAAGCTTTTGGGGACAAGACGCACAAAACAGCGTTGTTTTTACTGTTTTTATTTTTTAAAAAATGGTTGTTATGCTATGGGTTTTGGGGGGTTTGAGATATTTTTTAAATAGAGTAAAATGGTAAAACCTACTTTTTAACCCCAAAACTTAAAGGTTAGTTTCTTTCTTTGCCTTTCTTCCTTTTACATCCTTTATAGTTCAACTTTTTCCCACACGGAGAGACAGAGTGGTCGTCGCCACCGGTGACCCAATCTTTTCCGGCAAGGCTTCCGACAAGTCTTCAAGCAACCTATCCATGCACCTTCCTCTTCCTTTTCTTCTTCCTTGCACCTTCCTTCTTCTTTTTGTACATGTTTTATTATTACATCTAAGAATATAAATCTCTATAGGATCAAAATAGCGGTCATCCTGCTTTAGTGTTTTTGGAGGTTTACTGCCACAAGCTGCTATATGTTATTAACTACTATGTGGCATACAAAAAATAATAAAATGGATAAGTGTGTTACCATAGTATTCCTCTTTTGCTAAAATTTTTATAAAGGCTTAGCAGGGAAAAGAAATCCATAGACTAAACTGACCGAATCCTTGAGTGAATTACTAGAATTATATATTTTTGTTAGTGAACAAAAAGAAATTCATAAATCTTGTCCTTATTGCATCCATGCAGGAGTTGAAACGTCAGGCACAGGCACAAAGCGTATTGCCAAATGGAGATATGAGGGTTAAATCAGAGCACTGAGTGTTGTGTTTCATAGTAATTCTCATATTCTGATATTATATGTATGAGTTGTATAGTTTAGTTCAGCACCGCTTTCTTGTTTTTTGCAACTTGTTAAGTATTGTAAATTTGAGGACTCTAATATTTCAATGAGCTTGACGTGTGGAGGAAATGAAAATTAATTTGTGTTAACAACCAATAACAATTCTAATATCATACTCCTGTTCTGTATTTTGCCATCAACCTAAAACATCATTGATTATTGACTGTTTTGCTTGGTTTTACAGTAGTCAAAATATAAGACTAAAATATAGTTTCAGTCTCCATTCTCGTTTTTCACTTAGTCCCAAATAAAAAATTAACTGGTCTTGGTCTTCACAAATTATTTCATTCCGTTTAGTCACTGGAATTAATTTTTTACTGTTACATAAGGATTTAGGCGTTCAACTTAAATTGTGTGGCTAGAAACACCAAAAAATAGTATGAAAATTTATTCATATTTTTTGCTGTAAATAAAAAGTTAATGTTTAAATGAAAAATAAAACCACCTTATCTCGCAACCTCTTCTTTCACCCTGAATACCGTATGTGAATCTAAAGAAGTTAATGTTTTATTTGATAGTGCAAGAAGAATCTAAAAAAGTTCAATTTTAAAAATTTTATCTTGAATTCTCGAAAGTTAAATATTTTTGTTTTTAACATTGAAAATTTGAGGCTAATGTATTTATTAATTATTTAACCTGTTGACTTGTGGAAACAAATGCTTGACTTTAATTCAGCATGTTATCACATAAAAATTAAAATGCTTAATTTGTGTACTACGCAAAGGGCGGTGAATTTGATTCTCTTTTTCTACATTGTATTATAAGCAATAAGCAATAAGCAACCATAAATGATTTTTCATAAACTGGTTGGCAAAATTAAAGGAATAAAAGTAGCCAAGGAGAGGGACTTAACAGACAGAAGTAGCCATTCTCTATTAACTTACATTGAGGGAATAGATTTTCTGCCGCCACATTACAACTGCAGATGATTTTGAATTTTCATTAAATTTTATTCTAAAATAAAAATTTTAAAAAAAGTGGTAAACTTTTAAAACTGTACAGTGTCATGTGTTTTTTCCATTTCAGAAAATCCGGATTTCTTACCTTGCAAAGAAAAAAAAGTGTTTTATTTTAAATAAATTACATCAACATCCTCTTAAGTTTGCATTAATTACACAAGTATTCTCTCTTTCTTTTGAATGATCACAGTTAAATAACTTCTGTAACTACTTGTTCCCTACATTGTATGCAAACCTCACGAACACTCCTTGTATTTTCTGCATTACACAAATAGTTGTATGTTTTCCAAAATTTACATTTGATACCCTTCATCCATACAAAAACTCAATGGTTATGTACAATTGTTTCACAACAATTCATATTCACTCAAAAAGTCAAAATGCTTAATGACTTAAAATGTTTTAAAGTGTTTATTCAAAGTATTTAAGGACCAATTAGCAACATTTATAACTTGTAAGAACTAAAATAATATTTTATTCTTCAAAAAATAATTTAGACAACATTTTGGAGACCAACTTGTACAACTAAACTATTACGGAAAAAATTATCTGAAATTTTCTTTTAATGGCCGAAGTCCGGTGCCTATGTTTTCAGGACGAAAATAACATTTCCCTCATAATTTAAAAAAATATCAGCCATTGAAACATTCATAATTGTCTACATACTCTGAAATAATGAGAAGTAATGCACAGCATAACAGTTGGTCATATTATATTGGTGGGACTAGTCAAAATTATTTTCTATAGAAAATGATTAGTTAGATGCCTGCCTCGCAAATCGGAATGAGGAAAAGAAATAAAGAGAAGATCATCGTTTCTCGTTGCTCCATTACTTTTAGCCAAAGATGAGAACACTCAACTTTCTTTCTTACCATTCCACTTGAATTGAAACTCACGTGTCCCAATTTTGTCTACAAAAATGGGCATTTATATATTACACGTCACTCATACGTGTACTGTGATTGCACGTCAACTTGATGAAAGTAGCCTACCATGTCAGGTTTTTTGTTGGGTGGGGGTACATATCAAAGAATTATTCATCAAAGTTTCAATTATTAAATGAAAACATAAAGAATATTATCTTCCTCTTCAACCTATTAGGTAGTATTATCTTCCACTAGAAGCATTAATAGAATTAAATGCAGGTATTAAATAAATATAAAGGAACAAACATTAGACATAAATTAATGCAATGAAGTTTTTTTCTTCATATTTCCATAAACAAAAGGCTGTAGATGATAATTTAAGGAGCCGCAATGTTTGATAGCACAAGTGAAGCCTAACCAAACCAAAAGATATTTCCGGGGGCAAATGAAAAAATAAAATTGAGGAGTTAATAATCTTGAATATTTCGAAACAACCTGAAGGAACATATTGGTTGACAATTTGACACAAGACATGGTAGCTGAATAAGCTTCACCTGCCCTAAGGTCAACACTCAACATACATCATAAAGAAGCATGATTGCATGAATGCATGCATGCTTCTTTTGCTCTCAAGTTGTCCATGAACAAATTGGCTAGACACAAGTGACATCTATACTTAGGAAAAGGGAAATGATGAAAAAGATGGGTTGTAAAAGAAAATGAAAACTCATCAACTCTATGCCTTGCCATTTGGTTTTGGTGATGGTTGGGGAAACTGATGGTGATATGGAGATGCATGAGTACCATGTGGAATAGATAGGCTCCTTTGCTGTTGCCCATTTCTTGAGAGCAATGCTCCCTGTGTTCTACCATTTCTGGTGTTTGGACTTGCGCTAAACCGGTCGGCTTGCATCGTCTGGAAATAATATGATGAACTAGCCATGTCCTTGAGGTTTGGCAGAGGCTTTAAAGCTTCCACAACTTCACTCATCAAGGGTCTAGCTTTTGGATCTCTGCTAAGGCAGTGAGCGGCCAGATGCGCGGCTTTCTGAGCTCCTTTTATGGAAAAGTGACCTTCCAAGCGTGGATCTATCAACCTGTAGAACCTTCTTCTCTCTCCGAGATGTGGTCTAGCCCATTCCACAAGGTTGTGTTCCCCGTTGGGTCGGTTTTTGTCCATAGATCTTCTGCCGGTTAACATCTCAAGTAGTACCACTCCGAAACTATACACGTCACTTCTTGATGTAAGATGTCCTGCAATAAAAAGAGCAGAAACAATCACATTCGGAATATTTCATTCAGAAAGACCTGAGTGATAATAATCAGGATCAGAAAATGTGAATTTGGGGGTAACTGAAAGCTCAACAAATATGTGGTACTACCAGAGAATGATCATGCATTACTTCATTGATAAATAGAAGCTAAACCTTGCAAACTTGGACATAGCATATCCTCCTAAACTTACCCGTCATGACATATTCAGGTGCTGCATAACCATAGGTACCCATCACACGAGTGGACACATGGGTTTTATCACCCTCTGGACCATCTTTTGCAAGTCCAAAATCTGAGAGCTTAGCATTGTAGTCCTGAATTGTTAAAATAATATAAAGATCAAATCAAGGAAAGAAAAGAAAAATGTTATAACTTAAAATTTGGCACTTACTGCATCCAGTAGTATATTGGAAGTTTTGAAATCCCTATATATTACTGGTCGTTCAGCTTCCTCATGAAGAAAAGCAAGACCCTTTGCAGCTCCTAGTGCAATTTTCATCCTAATGGACCATGGAAGAGGCAGGGACCCTACAAAACATATAATGTTGTACATGAGAACATAAAATGGATATAATTAATAAAAACAAAGAGTATAAGCTAAAGTTTGAAGTTCCAATCCATACTCAATGCACCTAAAAGAAAAGCTGCTAAACTCAACATGAAAAACAGATACTTTCTACAAAACAGAATGGCAATTGATGGAAGCATAAGGATGTAGATCACTAGAGTAAACTACATCAAAATAAAACAGAAGCACATCTCTGCTTCCCCTACATTTTATCTTTAAAAAAAATATTTCATTCATAAGCAGTCCAAAGCATTTTCATCTGGCTTCGTATTGGGATTTGGGAGGGGACCATGTTTTGCAAGAGACATCCATAAGAATCCTCCATTGGATGTTGTCAGCAAAATTTTACTAGAAAGGAAATGAGAAACTGATAGGTCACAAAACAATAACTTACTCCTAAACAAGTGGTTTTCCAGGCTTCCCCGAGGCATAAATTCATATACCAGTAACCTTTGATCATCTTCAATGCAGTAACCAATTAGTTTAACAAGGTGAGGATGAACTAGATCACCAAGATAATTTACCTCAGCCTGTCACATGAACCAAACAAGTAATTAAAACTTGATAGATTCAGCATATAATCATATTCAAAGAAAAGACACATTTAAAAAAAAAAAAAAAGCTAAACCAAACAGAATAAAAAGAATGAATAATTAGATTAGTAAATACAAACCAGCCATTCTTTATGACCCTGGAGCCCATCATGGTTCAGGGTTTTTACAGCAACAGTAAGCCCTGTGCCAGGTTTCACAGGAGCAGTTCCATTTTCTTCTATCCATCCCTTGAAAACACAACCAAATCCACCTTCACCAAGAAGACTTTCTGGCCGAAAGTTTCTGGTAGCCAACTTTAGATCATTGAATGTGAATTTTCGCAACCTGGAAGCAACTTTAAGCTCCTCTTCAAGTTTTGAAGTGGATGAATTGCTTTCAGCATTACTTGTGGTTGTCGAGGAGACTACTGGGACAGTTGGTTGATCTCTACTCGTATCATTAGTTGACTTACTTTCAGCTAATGAGAAGCCAAAACCAAGCAAAGAGAGGGAAAAAACAATCAGCAAAAACCATAAGGTAGCATCAAGCAGAAGCAGTTTAGATAAGATGGAGGTACAGGTACCACTTCAAGAGTAACTTGATAAATTATAAAATGAGAGGAAATGCAGAAACTCGTTTCAACTAATAGATTCCACGAAATTTGTTCCAACTAATTGACTGTTTGTGTTAGATTCTTATCACTGCATAATTGCATATTGTACGAAACCAATGACCAAGACAACTCCCAACCCAAATGATTTTGCAAGCAAAATACAAAAAGGCTTTAAGAAGTCTCTTACAGCATGCATGACAACCACACACATACACATGATAAGAAAACTAAGAAGGTGATAAAATCCATATCACCAACTTTTACCAAGTCATGAATGCAATTGTCTGATTCATGAACTAATCTCTCACTCAAGGAGGGGGAGGAACTCTCAGCCAGAGATGCTCTACTGAGGGGGGAGGTACAAAAGAGTGAACCACGATTACCCATTCAAAGCTCTCACAAAATCCTAATTAAAGCATTGAACGTATCCTAACACCACTCAGATTTTAGAATATATTTAGAGTTTTGAACAACAAGAAACTATGATAAACTAAAACATGTTCAAAGATGGAACCTACAAGCACATAAGAAGAACATCAGTTCTTCCAGAAAAAAATAAAATAGAGATTACCATAATTAGTGCTGGTGCCACTAACTGAGCTATCAACCTTGGATCTTGAAGAAATGCAGCTCCCAATAAACCTCAGCCTAAACCAACACCCAGTATCTTCCTCTTCAACTTCCCCATCCTCTTTCTTCTTCTTCTTCCTCCCCTTTGATTTACACACATCCAAAGACTCCACCACCACCTTACCATTCTCAGCACCCAACCCCATCTATAACAAGCCCTAAAGAATCAAAATCATTAAAACCAACCCACCCCAAATCCCTAACACCCCCTACAATGCCCAACCCCCCACCACCAAATCCACCCTCAACAATCCCAGACCCAGATGACCAATTCCCAAACTAAACCTAAAAATCACAACTTTACCACTCAAAACCCCTCATAACCACAAAATCCAAAACACCCAGAAATTTAAAGTGCCGAAAAAAGGGGCAGATCACAAGAACCAGATCACCCCGCTTGAGCCCTAGATTGATCAGCTTGTGGGTAAACCAAAGAGGGTAATGCCAACCCTTTATGCAAAAAGAACAAGACAACTTAACTCAACTCAGAAAGCTATGCTCAAAGGAAGACACAGACATCAACCTCAGAGATGGGTTTGTGTCCTCCTAAGTCCTATGATGCACTCTATGCAAGCTGACCCAGTACAACTCCGAACCAATGCTGAAATGGAAACAGAGAAAAAAAAAATTATAATGTTGAAAACTAAAAATCAGATAAATGGCTTGCTGGTATCTTAATAAAACGAACTCTAAAAAACCATGATTCTCTCTCTTTAGTTCTCTCTTTATTATTTAATAATTAACAGATAAAAAAATATGATTTTTTTAAAAATGGAATTTTTTTTATTGGTTAATTTTTTAATTTAAATGAAAAATGGGAGGCGGAAAAAGGGGTTGTGGGAGTGTAGTAGGGTAAGGGGTAGGTGCCCGAAGAAGGGGAAGGGGCAGGGGTTTTGGGCTGCCCGGAGTAGGGAGAGAGAGTGACCGAATAGTGACCGGGCAGCCGGAGAAGTGGAAAGAAGGGGCAGGAGAGAGAAAGAGTATGTGGGACCCACCAAAGGATGGTGACGTGTCTGCCTTCGGCGGGCGTAGCATAGGGAAAGCCAAGTCGCGCGTCAGGTTGATCTCATTTTTGGCATATTAGCATTGCCAAATCATATGTTCTTATTATTATTTTTATGGAATGATATATTATTACTTAATTAAAAATATAAAATAAATTATAATTTATAATAAAAAATTATTATTTAGACTGACATCCTTATTACGTGGTGTAATTATAATGTTTTCATAGATGTAGGATTTTAAAAAAATTGAAGTGTAATATATGAGAAAATCTTATGGAACGTAAGTACAATTTTTTTTTTAAAATATATGTAATTGAATATAAATTATATGTTATTTTTTAATTTTTAATATTGTGTATAATGATTGATTATTTTTATGATAATTATTTTAAAAATTATTTTGATTAACTAATTAAATAAATATTTTTATACTAATAATCAATGTCCGTCTATGGATAAAATCAATAGAATCTTCATTCTATGTTTTCAAATAATATTTTTAATTATTAATAATATTTTAAGAAAATAATATATACTTCATAAATAATATTGGTATATTTATAGCAACTAAATAATTTTAAAGATGAAAGGATCTTAAAGCATTGAATCAATAATAAAGATAACTAAATGCGTGTATGTACATAAATTATGAAATGGTATAAATTTTAATAGGTAATTCTTAATTAGTTATTATAAGTTTTATTTTACTTTCTAAAGTAAATATTTTTTATTTTTTAAAGAATAATGTTATTTTCTAATTTTTTAATAAAATCCAATGACAGTAATATATACAAAATACATTGATACTATGCTGCTAATAATGTGTATATTAAAATTTTATTATCATTAATCTATTCTTTGCTGCTTAAGTTTATTGTAACTTTATTGATAAAAAAAGTTTATTGTAACTTTCAAGTATAAGTGTGCGTTTAATTCGTTTTTCAAACGAAATAATTATATAATTTTATTAATGTTTACATAATTTTAGAAATATACAAATAATTATTTAAAAATATTTTCAGGTATTTACAAAGCGCTAATTAATTTAATTTTACTAAGAGTTTAATACTATATATATTAACGATATAAAATAATTTTATATCATTATTTCACCACAAATTATTATTTGTATGAGTTTTAACACAACTATTGTAAAGAACCTACAAACATACAATATATGTGATTATATAATAATATGAAATTATTTTGTTCTATTATTCCATAGTATTTTTCTCTTTTATAAAACTATCACTTTTATTTAATTTTGTAAAATGTTATTTTCATTCTTTATTATATTTTTTAGTGACTTTAAGGATTAAATTGAATAATACTTTATGGAGATAAAATCAAAATTGAAAAGTTTTATAAAATAAAAAATGTAATGTTGACACTCAAAAACTAGAATAGGATTTTACATGATTATTATACGTAATTATAGTTCTTTTTTTAATTTGTAATTTAACTTTGGTTTTCTTAATTAGTTATTTTTAATTGTTAACATTTTATATATTAAAATAAAAATCAGTTTTTTTTATAAACTTTTGTCTAGATAAAAATTTTAAATTATTATTTTTATCCAAAATATTTGGATTTATGATTTTTGGATATGAAATAATTTAAAAAATTATAATTAGAAAATGAAAATTTGAAGAATTTGATCAAATATGAGATGTATTTTTACTCTTCTTAACATGTTTTCCTTCCTGTCTTATCGCTAAGACTTAGTTACTCAATTTACCAATATTAAAAAAGTGATTAGTTTAATTAATAGCAATATTAAAAAAGTTATTAGTTTAGTTAAATTAAATTACTCATAATTTTTTTAAAAAATGGAAACAAGTTGACAAAGTAAATGTGATAGAATGCTTTTTTTTTTTTTATAAATTGTAGTTCGCACAAGTTTGGATTAATAGAACTTTAATTTGTTTAATTATATATTATACGAGTTGGTCTACATATATACTTACAAGCTAAATATGTTTTTTTTTTTTGGCACTAAATATGGGTTTGTAGATTCATAAACCAACTAATTATAAATTAACTATTTCAAAGTAAAAATGGAAAGAAAGAAAAAATTATCATAGTCTCATAGATCATCAACTATATGTTTTTTTAAAAAGTAATTAATTTGAGAAAAAAAACATAGTTATTATGGAGAATAATTGCAAATTAGTCTACTTACGTGGGTTTATCAAATGTAATTCCATTTCAATACAAACTTATGCAACTTAATTTATTAATCATAAAATTAAGCAAATTAGTTTGCTTATCTATCAAGATAAGAGTTTTTTAACTTAAGCTAACATGTTTTTATTATATTTCCAACAAAAGTACCCTATTTAAATTATTTTATATATTAAAAATTGTATTAGGTAGTCTTATAATATGAGGTAATATTAACAATTCAAGTATAAATTTTCTTTAATGGTAAAAAATTTTAAAAAAATTTAAGAAATTTACTTCTTTTTTTTATATTTTTACTCATCAATTGTGGTAGGTAGTTTTTATACTAATTTAATAGAAATCAATTTTACTTCTTTAACCAATTCAATCTCGCCTCTAAATAATATAGATTCACTTCAATAATAAACAAGTATTATTGTTTTAAAAATAGAAAAAAGATCATTGAAGAGATGCTATTAGCGTAATATGGATAATGTAGATCACATTATTAAAGATAATATGTTAATAACAATAATTTAAATAAAATTAATAATCTATATGCCAACGATAACAAATAAAAAATTATTATAAATTTATCAATATTGTCTTAAAGTTATATTCATAATATATTTTTTAGTTAACGCTTAAATATTTTCATATAGTTAAGTTTTTCCTGGTACAATTTAATTGTAAACTCGAATCGACCGTTTCGTTAACTTTGTTATACATATTAATCTTTTTGTGTCCAGATATAAAGTATCAAATTATTGATGTTGTTTGTGTTATATATTTTTTATTAATATGTCAATATCGATGTTGCTATGTTCCAATAATAATTTAGATCAAACCAATTATATTATTATTGTTGTCAGAAGTTTGTCATGAATATTTTTGGGTACGGAAGAAAGTGTTGGCACGTGGATAATAGAGGATAACCCCTGTGACATTGCTATTGAATGCTGCCTCTTCATTATAAATTTAATAAGGCTTTGTTTTATGGGAACAAAATGACGAGAAAGAGACAATAACAGTTTGATTTTGTTTTTTATTTTTTAAAAAGAGTTTTTAAAAATAATTTTTAAAAATTGTTTTTAGAAAGAAAAGAAAAAAAAAATTGTTTAGTGAGTGTTATTTGAAAATAGGTTAAAAAATAAAAAATTTTGTTCATATTTATTAAAATTCATTAATAAAAAGAAAAAAAAAATATATTCTGACTGTATTTTGAGTTTTCAAAACAAAAATAAAATATCAAAAAACAAAACTACTTTCATATGTTCTTATTTTTTAAAAACTAAAAATATAAAACTGTTTTCAAAATCTGCTTTCAGAAAACAATACCCAAACGAGTTTTTTAGTTTTTAAATACTAAAATAGTCAAAACATTTTTATAGTTTTGTTTTTCAGTTTCTATTTTTGTTTTGAAAACTCAAAATTCAATTAGAATATGTTGTTTTTTGCTTTTTATTAATGAAATTTTAATAAATATGAACACGTTTTTTTTCATTTTTACATTTTCAAAAATGGTTTTCAAATAACACTTATCAAACAAAATTTTTTTTTTCTGAAACCAGTTTTTGAAAACTCTTTTCAAAAACTACAAAACAAAATCAAACAAATCAATCACTTTGAAAACAAAACAAAACAAAAAAGTTTTTGAAAATGTTTTTTGAAAACATTTTTTAGATATAAAATAATTAAGTTTTTTATTTGATTTTGTTTTTTAATTTTTGAAAAGAGTTTTTAAAAAATTATTTTTGGAAAAAAAGAAAAAAAAGGCTTGGTAAATATTATTTGAAAACTGTTTTGAAATTGTGAAAATGAAAAAAGTATTTATATTTATTAAAATTTTATTAATGAAAAGAAAAACTAACATATTCTTATTTTATTTTAAGTTCTTAAAATGAAAACAAAAACTTGAAAAATAAAACTACTTATAGTTGTTCTTATTTTTTAATTTTGAAAAACTAAAAAATCAAAACTGGTTTAAGAAAACAGTAATAAAACAAATTTTTTAGTTTTTAAATATTAAAATACTGAAAATAGTTTCATAAAACTATTACCGACAAACATTAAATTTTTACTGTTTATCATAAATTTCACAATTTGTTTTACTTTATTTTTATTTTTCTAATTTTTTCTTAACCAAATCCAGTTTAAAAATTGTTCATCTCAAATCACCACATTCACTTTATTATATAAGAATAAGATAAGATGAATCTATAAAAAATGTGTATAAGATGATTTAGTGGCAAAAAATTAGAAAATGCATTTGAATTTTTCTACTACAAAACCTAACAAATTAAAAATTAGTATTTACAAATAAAGAAACCACATTCGCTTTATTATATTTATTTATTTATTTATAGTATTCATTTATTTATAGCTCTACTTTAAACGTAAAGAGGTTAATTTTTATTTATCTATCTATTTACAATTTGAAGAGAATATTAAGCATGCAATATTTATATATTTACCATAAATAATAGAAAGTAAAAATATTAAGATATAAAATAATTTCAAAATAAATAAAATATAATTAATTAAGTTTCGTAATTATTATATTAAAAAATAAATAAGTAAGAGAAACATTATTATTTGATGAAAAGTCATTGAAAGTTAGTTAGCAGTTAACAATGAGATATACTGTGGATCAATATGTGGATAAATTGGTGGGGTTATTACAAATTAACCAAAGATCTTGAATAATTCTAAGTTCCCGGAAAGTGAGTATCTATCTTCAGAGGAAAATAATTCATAATGATCCTTAGAAGGTTGTACGACATTCTTTACACATTCTAACTTTAACTTTGTAATTTTGAAAATTTTAACACTTAATTTTTGTAATATTACAAAATTTAAAATACAAATATCTAAATAATCATTCAGGTAAGATAAGATTAAGTCGTCAAAAAGTATTAAAATAAAGATTCTTTAGAATTTAAAAGATTAAAAATTTATTATTATAAAATGATTATTATAGTTAACTAAAATACATGTTATATTTGAATTGTTTATTTTAACCATGATATATATATTTATCATGTTTGTTATATGAGTTTAATTGGTATACACTATTAGTGTAAAAATTTTTATACTGACATTCAATCACAACCCTTGATTCATAATAAATTTATTTGTTGACTTTACTCATTACTCTTTTTATTTTAAAAGTTACGTAAATGAAAAGTCATTATTGAATGTCAGTATAAAAGAGTAGAAATCTTTTACACTGACAGTGTATACCAATTAAACTCTTGTTTTATATATATATATATATATATATATATATATATATATAGAAAATATATTTGATATGAAAATATAATATAGAATTTAGATAAAATAGTCTTACATTTTATCTTGTCTTATGTATCATATTTAATATAATGAAAGAAAAATAAGGATAAAATAATATATTATATTTCGTTAGATGAAAATTAAAAAATTAATCTGTTAAAATTTTTAAATAAAAAAATAAGTTAGGTGAAAATAATTTTATTTTTAAAATAATAGTAAGATAAGATAAAATAATATTTGATTTCATTTAAATTTATAGCATAAACCAATCTTTCATCAAAATAAACTTATTACATAGAGTTAAGTAGTTCCTTTGAAGAATTGTAAATTAATTAATTATTTAAGGGGTGAGAGAGAGGGATAGAAAATAAAGTTAAACAAATCAAAGAGTTGAGACATCGGTTCAAGAGGTGAATAAAATAACTTTTTTAATCTTCTATGATACAATTTTATTGTTTGACTTGTTATTAACCAAATTCTACATGTTGTGATATTGGTATGTTATTAATCATGGTGCATGAATTCTTAATATATGCTATTAATCTCTTATGAACAAGGGATTGTCCATAATACAATTATTAATTATTGAGATTAAAATTACGTGGATTGAATTCATGAAAGCTTACAACATAGGCATTGATTTTTCTTTAACTTACACTAATCACCATGACTTGTGAGTATATACGTTATTCTTTCCATGCATTACTGGTTTGGTATTCTTAAATTAATGCTTATAAGATTATGATATTAGTATGATATGAATATGAAAATTGTGGTTTATTTTAGAAATTTATATTAATTATGTTGTAGTTATTATTTGAGATACCTCAATTTTTTATATGGGAGGAACTTATTTAATATAGGGAAGAGACTTTAGATACATTCTCCATTTGAGATGAGGAAGCAATTCGAGATACTCTATAATAATGTGGGGGAAAGCAACAGACACCCTTGTATAATAGTGTGGAAATTGAAGAGTGTGAGTGAGTGATGAGGAGTATCACTATATTTTTCATATTGTGTGTTTGCATATGATGTTAAATCAAAAATTATGTTTATCGTGTTTATTTATTATTGCTATAAATTATTTGGATTAAATAATAATTTATATATAAAGAGAAATATTTTTATTACTACGAGTACTATGATTGTTTTTCTGGATTTTGCGTCGGTTGAGAACAACACTAATTGCAAACTCCTTAACCCCCTTTTTTATAACCCGTTTTATTCATTGATATATAATAGGTATGACTCACATTAGTACCTAATTAACACTTAACAACAATTTTTTATAGATAAAATATTAATTGTTAATATATTAATTTATATTAGTTTTGTTAGCATGTTACTATTTTGACAAGATACTTTTAACTATTTATATTTTTTAAATTTATTTTTATTTAATTATTTTTACCTAATTAATTAATATATTTTAATCAACACGTAAAAATTAAAAATAATCTTATAAAAAAGTTGCCCCCTGATATTTTTATACTCCTTTTAAAATTTAAATACAAGAAAAATTAACTAACTTGTACATAATTAATTTAGTCATCATCATTCAATTTTGTTGAACTTAAGGATTTTAAAATATTATTTATTAAAACTTAACATCGTAAATAAAAAAGAGTTATTAAAAATAAATTTCAATTAATTAAAAGTATTTTTGAAATAGTACCATTAAATAAGATAAAAATAATTTTTTATGAATGATAAAAAAATAGTTAATATTTACTTATTTGAATCCAATTTTTATTTATATTTTGATCGAAGAGGAAATATAATTAAATCAAGAAATTAATATGTTCATTACTTCAATTCTCATAACTAGTATATTTTTTATTGCATGCATGTATAATGATAAAAGACTTTTATTCTCTATTATGGAAAATAAAATACTAGTTAAGTAATTAATAAATAAAATATTTTTATTGAAATATAGTTTAAAATAATAACATTTATAATAGTAAAGACTATATTTTAAATAAAATGGTGAGATCATATATTTCTATTATTAATCAGGTGAGTAAATACTATACTTTTAATTTCTTAATCATATTTTAAAATAATATTTATAATAACAGTAATGCACAAAATCCTATACTTTTTTAATTTCTTAACTATAATTTTAAAAATTAATACTTAGTTATTTCTTATATTTCTATTATTAATCATATGAGTAAATACTTCAATGCATTCACTTAGCATAGATATTGAAGCAGGTTAGAATGAAAAGTCAAAGATGACAATATCACCTGAATAGTGTCTTAGTTTAAGCCCTTAGTAGATTTCATGGAAAGCTTCTTACAAAAAGGTAACAACTCAACAAAATATCTCAATGACTAAGCTCGAGCATGATGAGAGGTTAACAACAGTCACAATAACCTAAAAAAAGATCATTACAACTAATCACATTGTAAATAGTCAAAAGTACCTTAAACTCTGAAAAATAACCAAGAGTAGTGCACTTAGAGTGAGTGATAATCTATGCTCAGTCTGACAGTGAACATAAATTGCATATTCTTCACGTGATGAAGTTATTTATTATAAGCAAATTGTATAGTCTCCCTGTAAAAGTAACTTTGTACTAAACATAAACTTTCTCATTTTGTAACTAAAAATAATTTATTGTTCAAAGAATAGTTAAGAATAGTTAGAAGTAACTTTGTGTATCCGGTCTTAAACTCATAAGGAGTTTAAGGGAAAAATCATAAGTGGTTAATGTTCTCATTGTAAGCTAAAAGTGACATAGATAATATTTGTAATTTTATAATAATGGTTGATTATATAGTGAAATATTCCAAGAGGTACTTGAAAGATAATTGAATATAGCTAAGTTTAAATTAACTAATATAAAATACTCACCACGGTGTCTATTTCAATGTTTATATTTACCATTTGGTTTTAATTTAAAACATTTTATAAAAGAGTATTTGAGAACAGTTATAAACTATAGATGTAGATGGTTTGTTAATCATCTACTTACTTAAGAAATTCCATAAAACTTATTTATAAAGTTTTTTTAAAAGAATTACAAATTTTTTTATTCACCCCTTCTAAAAATAACATGATGTTTAATGGTTAACCTACAACAACCTCATGCCAATTAATCTACATACTCGGTGATATTAAAATATTATTTATATTTTAATCTATATTAAGTAATATAATTATAAAATATAAAAAGAGAGACAACATGTTTTACACAAATTAAGTAACATAAAAATAAAACTTAAGATATTAATAAAGTTATAACATTTAATATTGTTGTATAAATCAAATTTTAATATTCTATTTATTAAATTATTTATACTAACTTATACCCACCAAAATTTAGATAACTCAAATATATATTTATAGTTTTACAATCTTATCAAGTTACACATAACTTCACCTTTTTTTTTCTTACACTATCTTTGACTCCCTTCTAAGTTTAAAAATATTACATTAACATCCTTATATGTTTGAGGACATTGCATTAAAACCTTTTTGATATCTTGTACTAACAATCCTAATTGTTAAAAAAGAAGAAAATGGATGTATGTGCTATTATAATTTGCTTTATGTTTAATGTTATGTTAGTTTGTCTTTCATGTTATGTTTATTTATGTGTAAAAAAATATTAATTTATTATAGAGAGTAAAATATGGGTCATAGATGTAGGTATATATATATTGGTACTTGGTGAGTACAAAAATAATTATCAAAATTGTTTCTTACACTCATATAAAGTTAGATACGAGTATATTTTTTAAAAATAGATATCTGGACATGTAATATAGTATCGTATCCAGCCTATACTAGTTAATTGAATAGAATTTGTGATTTATTATAAATTAATTCCTTATTAGTTAGAGATAAAAAAAAAAAAAACTAGTCCAATATCATGGCTTTGTGACTTGTCATACTCCTATCTCATGTATTTTAGATCCTATTAGAAATTCTAAAAGTACCAGCAGAACATTTTTAAGCACAAATTAGAACCAAGATTCAGTCTTGTATAATATCGCCAATCCCATTGCAAGATTTAATTAGTCCTTTAAAAAAAAAGAAAAACTACATAACGAAGGAGCATAAAGGTAAATATCAAAATTAATTATCTTTTTGCTACAATCAACCACTTTCTAAATTAAAAAGAAAAAAAAAATTGGATCATGGGTTTATTTATAAAAAAAAATAAATATTGATGCATTATGCTAGTTTGCAGTCAATATTTCGAGTCCAGGAAAAATATGTTCAGATAGCTTAAACTCTAATATTAAGCAGCACAATTTTTGCCTGAATGAAATTATCACATACTATATGCTATCTAATTTGAACCATAACTACATAAACGAAAAGTCATTAATGGAGACAGGGAGGGAAAATTTTTACTTTGAAACTTGAAATAGAAATCAGAAAAATAAAAAAGAGGAAAAGGAATAAATAAAAAGAAGATTATTACTTTTGATTGGCGAAAAAGGAGGAATATTTCACACTCTTTTTCATACTTTTCCTCCTTTCACCCACCATTTTAGCATTGGAAACATAGCATTGTTTATTAATAAATTGATTTTAGTGCTTTTACCCATTTTCACATGGTATTATAGAAAATGATTAAATGAAGTAGAGAACATCAAAGGTTGCTAGCTATACACATTGCATGCTTTCACATTTAATTAAATACCTAAAGTCTTGTTTCAAGAGTAGTTGGTGGTAACTGAGAATGTGTGTTACAGCACACAATTAATATTAACTAAGAGACTACTCTTGACTTTATGCATATCATTTAGACGCTTATGCTGTGGTTAACCAATATAATTATTTTCCTAAAAAAACCAATATAATTCTTGTTTTTCTTTTTAAATTGAGATCACATGCATCTTAAAGATCATTCTTTTTTTATAATATTTCAGACAAGTCATTTAGAATAGTGTAATTTTTGTATTTTCTGACATCCTCCACAGTAATAATGATAATTGCATGAAAAATGTGATTCATGGAGACAATTTATCAACCATATTTTGATAAAAGGTCTTTATAATTTTTTTTAACTAAAAAAAATATCATTCTGATTGAATTGGGTAAGATTATTACTGGTAACAATTTAAAATAATCTCACATTGATAAACTTGTTTAGTAATATTATGATTTTTTATGAATTTAAGGGTTTGGGGTAATTTTTAAGTGAAAAAGTGGACACAAATTTATATATATTAAAATAGTTTTATAATATTATCCATTATAAATTACTATATATATGTAATAAATTTATTATTAATTTATATATGTTAACAGCAATTTTTATTGTTTGACAAAATAAATTACTCTACAATGTCAATTTTTATTATTAATTAATTTAAAAGTTTAATTAATATACATTATTAGTGTAAAATATTTTTAGACTTTAATTGTGAATTTTTATTCTTAATTAATTTAAAAGTTTAATTGATATACATTTATGTGAATTTTAAAATAGCAATGAGTAAAGTCAATAAATTTACCATGAATGAAAAGTTGTAATTAAATGTTAGTGTAAATTTTTACACTACCAGTATATACCAATTAAACTTTTAATTTGAAATGAATTAAATTTCTGAAATATTTATCCATTTTATCATTCATAGTAAATATTCCTTCTTTTCTTCTCTATTCTTTTCTTTTAAAGAGATTTTAAATGTTCTTTGAATATATATATATATATATATATATATATATATATATATATATATATATATATATATATATATATATATATGAATAATAACTAAAATATCTAACAACTGTAGATATTAATTAATACTGTAAGAAAGGGAAATAAAATATTTGTTCCAATATCTTGTCCCATTCTCTACTTTCCCAATTAAATGTTAAACTAACTAGCAAAAGAATCTCTCTCTCTCATATAATTGGTCATAACTTCTTCTACAGTTGGTAACTTTTTCAATTAAATTTCCCAATTTTAATTGAAATAGAAAAAAAGAAAGAGCATCGGAATATTCCTCAGAAAGACAGAAACTAGCCTTCACGAGTCATTGCGTCAATAATTGATTATGCATGCATGTCAGATTTATGGACGGCCAAAATATATATTTTATTAATTTACGTTACTTTTTTTTACTGAAATTTATTTGCTGTTAAATGCTAATATATATATATATATATTAGTTGAACTCACGTTTCAATCAACCTTGAACATCTTAACTTGCATGTATTTGAAAGAAAAATATTTTAAAAGTGAACTTATCTCTAGAATATTAAACAAGAAGGTATATATATATATATATTTTTTTTTTTTTTTTAAAATTTTAGTTAAATTAAATAAAAAATGCACACTTTTATTTTGAAGATAATTAAATTCACTTTGCGAGAATTTCATATTTAATTATAAGTGAGCATCACACATGTGAACAATGAAATATAAAGAAATATTTCAATATGCTTTTGAACTTGCCGCATGTTTAAAAAAGAGTTTAATGTTAACGTATTAATTTTAAAGGGTTATTCAATTATAAATCATATTTTAATAATTAACAAATTATCACAATGTAATTTTATGATTAGTGTAAAATTATTTTAAATCATCATTTTTTCTTTGAAAATGTCGATGTTAAATATAAAAAATTATTAATGCTAATAAAATTTATTTCTTAAAATTGATACTGACTAATGAGATAAAGAAAAATGAAAGAAAAAAGCATTTGAGAAAGAAAAACAGAAAGAATTTGAAATTAATGTACGTGTAGAAAGAAACAAAACTAAATATTTTGATTTTATAAACCACTTTGTCATTATTATTTTTATAATTTTCAATTGTGATATATAATTAGGAGATAAATACTATTTTGATCCTGAAAGACTGTGCTTTGGTACTGAGTCATAATTTTATTTTTTACCCACTAATTCCTGAAAATTTCTTCCATCAAACAAGTTAGTCTTTAAAAATTTTGGTAGCGCTTTTAGCCCCTAGAAATTATCATGGAAGTATATAAATCGTTTTCTAAAACTTATTTAATAAAATATTTTAGTAAAATAAATTCTCATAAAAATAAAATAAATAATTTTTTTATGTTTCTCTAAATTGGATTCTGGGTAATTCTTGTTCGCATTGGACTTTCTCATCAAGCCTTTTTTTTTCTGGGCTTCGAGAATACATTCATTGGTGACAATTCTGATTTATCACAATTATTGAGCTATGAACTCTCCAATTCGTTCACCTTCATCATCATCCGTTTATGATGTTAATAGTGTTTATTTTTAATCATTATAACGTTTAAAAATCATCACAAATATTTTTTAACTAATAAAAAAATAAATAAAAGTGAATAAAGGATGCCAACATGTGATTTAACATAACATTGTTCACATTTTTAATGGTGTTAGTAATGATCTTGATAGAAGGATTAACTTGTTTAATGAAAAAAAATATATTAGAGACTAGCATGTAAAAAAAATTCTTTCAATAACCTAATAGAAGCTATCTAATATTTAAGGACAAAAATGGTATTTCACTCATATAATTAGTGTAAATTGTTCTTACCGAAGTTGGGCTGAAACTTGGTTCTCCTCGAACTTTTCATGGGAGACTAAGTTGCCTTAGGGTTTATAGGTAAATACTTGTAAAATAAATTATGATACTCAAGTCAGCTTGTGAGAATAGAGAGAAAAAATATTAAGATTACATACTTTGAAAGTGAGGGATGATCTCCTTAAATACCAGAGTAATGAGCATGGAGTAGCACTTGAAGTAAACTTAGAATTAGGATTGTAAAGAATTGGGCCGAGTTCAATAACTAGGTCAAGTTGATTATTTGAGCTGAGTTACCTAACTCAAGTTGGCAACTTGGGCCAAATTACCTAACTCGGAGTACATAGATGATCATGTACATCCCTAAAAAGTAAAAATAACTATAAGTTTAGTTGGAAAAGATAAAAATTATCACATTAGTTTCTGAATAAAAAAAATCAACAATTTAGTCTCATTAACTCTGAACAATTGATAGAAATAGCTTATTAACAATAATTTTTTGATAAAAGGTTACTTATGTTTTTTAAAATATGAACACTAAACAACTGTTATAGAAAGATGAAAATTACAATATTGGTCCGTAAATTTGAAAAATTACTCTTATCTTAGTGTTACATTATATCCAATTACATTAGTCCTACCACTAGAAAATGTTTGACTAAGTGATTAAAATATATTTTTAAAAAAATTGGTTAAATCGTTTCTTCTGTTTTCCCCTTCTTAGATAACACAAAATCACAAATCAAAATCCAATTCAAATACAAATCATATTCTAGATCGACAAAATCATTACAAACCGAAATTCAAAATCAGATTTGAAATCGCTTGTTCGTGGCATCGGAAAGCAATTCATTGCAAAGCACACACTTTTTTTGTGCATTGAAGGACTCTTTGTAGTTTTTTGAACAATAAAAAAAAATTCTTCAAAAACTTTTTTTTAATACATAAAAGAAAGGTGGTGGAGCTTCATGTTATACACCTTGGTCACCTTCTACCACATCATTGTCAATTCCCTTTTTCCAATCGAAGAATTACTTAGTCATCATGGATAAACAATTTCAAATGTAATTTTGGGTTAATGTTTAGATTTGCTATGGTTTTGTATATCTAATTTTGATTTATTGATCCGATTTATGTTCTTTGAGAAGGGAGAAAAGGAAGACAAATTTTGATAACTTTTGAATTGTAAAAAATTGCTTAATATAGTTTAATGACTTTGGTCAAATATTTTATTTAACGTAATGTAATAACAATGGGTGTGTTTTCCTAGACTACAAACGTACAAAAAACAAAGGCTGATAATTAAACTAAACATCCGTTCACATTATGAAGAACATATTTGGAAACACACAATACTAAATTATCAACAATTTCAAATTTAGGGAATAATATGATAATTTCTGTTTTTCAAGAACTTAATTTTTCACACTTGTAAGGCAAAGATACGCAATTTTATTGCAATGTATGCTATTCTCGTTAATGTTATCAGATGAAATTAACAGAATGAATAAATTGTCACCATTTTTTCAGATAAAGAAAGTATATGATTTCATCTTTCAAAAACTAAACTCTGAACAATTTACACTTTCAAGAACAAAAGTAACATTTCTCCATAAATACGCAATACAATTTCAAATGACTAGTCATTAGGTGTAAAAAAAATGTCTAAAAATAAAATGTGAAGTAGCAGTTCATGAATACAAGGCTTCCGCAGATGATCAATTGAAACGCACTGAAATTGCAGTTGCCTACTTCTATGAATCGAGAGGCGATTCATTGCTTTCACTCTGAAGAGTCAGATACGTACATCTTCACAAAAAAAATAGATCTATCTATAAAGTTTACATTCTTCCCCTTAAAGGGGTATGTGACAATCATCTATTTTGAGCTCGTGGTTTACAATACAAAAGTGAGCCACTATTTTTCTGAACAAATCAACACGCCAACTCCATCATCACAAGGCGACAATAAAGGAAGAAACCTTTGGGCCATTGAGAGCATGTCGGAAGAACAATTCCAAATCCTGGTCGGCCATATTTGCTTCTACTGCACTGGACAACATGCTTGATAAAATGCAACCAGATTAAGTCCATCTTAAATAATCCCCTTGGAAATGCTAGATGTTGCATTTATCTTTAGTGAGCGCTCAGGGATGTATGCAACACCTGTTCAGACCAAAATGTAAACCCATGAGTACCTCGGCAATATCATAATTGGCATTTTGCATCTTGATTACCATTATATGCAGAGAAGAGCAGGAATGCACAAAAAAAAGCCCAAACTACCAAATAAAAATGCTTGTCAGAACATATGCTTTGCACCTGTAAATACCTTAAGTGATAATAAACCAAGGACTAGTTCCAAGCACAACTAGGCATATATAAAAAGGATCCAAATGAGTATCTGGCACAAAAATCATACCTAGGGAAAGCCAACACAACGCCTTGTAAAATGTATGACTAAAATTGCTGTGCACAAGTTAGAATTTTTGTTATGCCCATGAGTGATTCTTCAAAAAAATCGTGGAAGTGATAGATAGAATTAACAGACATTTAGGCAGCATAGCAGTTCGTCTTCCCATCAACTCATTACTAAGTATTAACCAAATAATTCTTGGATAAAAAACTCAAGCATTAGGTCTCATGATCCGTACCTTTTTCCATGACATCAATTTGCAAGGAGTCAAGTGTAATTATGCCATCAGTCAATGGAAATAGCTCAAGCTTAATGGTGGCTGTGGATTGAGACGGGATACATCTGATGTGACAAATACATGATTTTAAATTAATCACTGTTAGTTTTAACAACGTCAGAAATGAAAAGTAGAGTAGACATATATTACCCAAGGGGAACTCTACTCTGCAGCCAAAGATGAGTACAACTTAGGCCAGAACTAGGAATAACATCATCATTCATTGAAACTGACTGAGGTCTGACACCATCGTTTTGTTTCTCATTTTCTTTTATAAGAGAAGTGAAGCTTCGCCTCTGGGTGAAGCCAACATGTCTTTCAACATTTATCCTTCCTAAAAACTCTGTGAAACCAATAAAAGGACTCATTGGACTAGTGGGTGAACTCAGAGAGACCACTGAAGGGGGTGAAGTAAATGAGGCTGGAGCAAGAACTGTCATAGTTAGATCTTCTGATGTCAAATTCGAAGCTTGAAGAGTTAAAACCTGATAAAAGAGAAACAATTATGCGAATAAAATTGTAATTTAAGTAGGAAAATTATTATAAAGGAAAAACTAAATATGATCTCCAATCCAAGGCCACAACTCAAGACAATTAATAGTTAAAACATATGTTGACCTGCACAGGAAGTTGTGAGTTTCTTTCATAGGGCCCAGTAGACTCTCCTGACATCTCAGTTGCAACAGAGATTATAATATCCCTTGATGTACGTGGTCGCCAACTGGTTGCTTGCTTAAAGAATAATCTAGATGCTGTATTAAGCATCAAAACAAGGGGAAAGCAATTAATTGACACCTTAACAATTATTAGATAATACACCAACCAACCAAAGACAAAAATCTTACAAGTATAATTGCATCGACAAGACACCATAATTGCATACTGATTGTCAAGTGAAGCGACCATTGTTCTGTCGGGACTCTTGGAAGAAAGACTTGATTTTGCAGAGTTTGGAGATTGCACCTTTGAAAACTGAGAGCTTTCATCCTGTGCCTTGTGATTCTTCAACATTGAAGTTGCAGGTTTAAGGATAAAAGAATGTTCTTCACCTCTCCTGAAATTAGAAAATTCAGGTCAGATGATGATGATTATTAGAGCTAACTACATACATATATGATACACCAAAGTTTGAATTTAACCAACTATATTTACTGTTAAGCACCTTGTGTTATTTTTAACTGTTAATTAGATTGATTTAAACTACAAAAGATACAAACTCATACATTCCAGAAGAGGGGGTGAAGCAAGGGTAAGCATCCTTTTATTGAAAGAGAGGAAATGAATTGGGGGGATCCAATTCCTTCCCATGTACAAAAAAAGGCATTTCCCCCAAATCTGCATGAGGGCAGGGGAAGTTTATTCTATTACTGAACATTAAAAGATTTCACAATATTATATTTGTCATAGCCTTTACTTTCTACCATGACATTCCCATGTCCTTCAGAAATTCACCCATTCAGTTGGTCAACTAAGAAAAAGAAGGAAATTCAATTTTAGCAACGTAATTCACATTAGTCTCAAAATAACAAATAGATATATTACAGGATTGTTATTATGCTTCTTAATAAAATTCAAAAGGTCACGGCTTACACATACTTTCCCCATACTGTCAAAATCATGATTCCCCTCCCTTCCCTAAACTATAATGGCACAAAAGAAAATTTAATGCCTTTATTATGCCATTAATATTGGTTTTCTTACATGGATGCCATTTTGAAACAATTCCTCCCATCTTATGCAGGGTTGGGTCACTCAACACAAGCATACATAACTAAATAACCAGGAGCACATGCAGCATGATACTTTACAGGATTATTATTATCTTTTAAATAAAAAGGTAAAATTTTACATTTCTAATCTTACAAATCACATTCTCCTCCCATTCCTAAACCTGCATGGTACTAAAGAAAATTAAGGCCTTTACCACATCTATAAATAACAATATTCACAATATTGAACCCATAGTCCCTTACTCATGGATCGCTTATATGGCACTGTGAATGTAACAGAAAAACCTGGGGCGTGTAAACTACAGCATGATATAAGACAAGAAACAATACAAAAAAACAATAAGATACTTAAAAAGCAAAAAACCTGAGGGCTAAATTTGGTAAAGAATGGTCATTTCCAGCTTCAATACATGCAATTGGTAATGATGATGGTGGTCCACTTTTTGTAGCCTCTTCAAAAACTATTGTTATGGCATCTATAAATATCACAATATCTGGAACCTGTGCAGGAGCAATATTCTGGAGAACAACTAATGAAATATTAATATAAGCAGAAGGTGAAAATAATTAACAGTATAAATGCTCCCCAAAAAAGTATGACAGTGTAATATTCAACAAAAATAAAGATATATATATATATATATATATAGCAAATATTTTGGTTCAATGACATTATAGTTCAAACCTTTATATGAACGCACAGAAGATCCTCTGAATTGCAGTCAGCTGCAAAGGAATGAATCTCTACAGGCTGTATTATTTCAAATTTCCTTCTCCACCTTCTTCCAGGTGTGAAGATACCTTCTAATCCACAGCAAACTGAAAACCTTTCTCGCTCCAATGAGACACCTCGAAAAGATAAAAGTTCTTCAACTCCATTTTTTTTCCTTAAAAATTTCTGTGAAGAGAATTCATCCCAATCTTCAATATCAAAGCTTGGCTTAGAGCTAGCTGCTTTTAAAGGAGCAGTTGATGTACCAGTATTTGGGGGTAATGCAGACATGGAGTAACTTCTAAAATGGCTGCCAAAGGAAAATAGTTGAGAGGCAGAGGATGTTGAATTGGACCTCTGAGAGGTGTTGCCCATTACTGAATTTGAAGAAACATGAGAAGGTAACGAGCGAGAAGCAGAGGGGAGAGCGTTATCTAATGGAAGTATCCATTTTAATAGTGCTCCGCATGGATCCTGACGTGTGTAAACTGAATTGTCCTGGTTCTCAGATGACAATATTTTCTCCTGATACTTTTCATATTGGAGAATTTCTATACAAGGATCTCTAAGAAAATCAACACCAACATTCACCTGTAAAAGAACCTGGATCCTTCCAAACAGGAAAATAGAATCAGATCAGTAATCTGACTAAATGAGAATGGACAGGCATAATTAGAAGGATATTGCATGAGCAAATTTTCATAAACTCTGATGTATTATAGAAGCAAGGCAAATGCTACTAAAACATATTTGAAATGTAAAAAAAATGCTTAAGTAAAATGAAGATAAGAGATAAGGTTCTAGCCATTAGTAGCCAGTAGAGAGAAGCAATACCTTCACAGCACAAAAGATTGTTCCAGAAATCTAAATAATGATGATAATTACACAGGTCAATATACTCCACAACAGCTCAAGTACCACAGAAACATTTGGCTCCAAATGCAAGAGAAATATTAATATCATAAACATTAATAATGCAATTACAAATAGGGTTGCAAAATGGACTCGTAAAATACCCTCACATGAGGTGGGTAATTACCCGCAAAAATGGGTCTGGGTATGGGGCAGATCCAAACCCATGAATAATATGCGGGTATTAGTACTATAGTACCCAACCCGCCCCACACCTTATATATATATATATATATATACACATACATAATTATAATTTTGGGTGAAAAATATTATTTTTATTATGATCTATGATGATAAATAATATAATTATAGAATAAAAAGAGACATATAATATATTTTATGCAAATTTACTAAGATAAAAATACAATTTACAAGAAAAATTGAATTATTTACTAAATAATTCTAAATAAACTTACAACATTATTTAATGTTATGGTAAAAAAAAATAGGTTTATGTGTAATCATATAAAACTTTAAGGAGTATCTTATAATTTGTTCTTCTATGTTTAATGTTATGTTGATTTGTTATTTATAGGTAAAAGATATTGATTTATTGTCTCTATCTATACATAAGTAAAGTGCGGGACTTAGGCATACCATGGCACCCAAGTCCTTATCAACAAACAAGATGCACAAAATAAATTGGATGGTGCACAATAAACTTATATTACACAACAACATCCAGATGTAGTAAGATTTTATACATTTTTCCTAAATTATTTTCCACGATTTTTGCAAACGGGATGAACAAATGAATTAGATGCCAAATAGATTGTCTGGCTTGCATACTGGGGAAATGGGAAACTGAAGATATCAAGAGGGAAGAAGAAACTAAGAAGGCTCACCCAAATTAAATAAAAAAGTAGTACTCTATCTTAATGTCGAACTCTAAGATCTAGACCAAAAGTTTAAATGAAGAACATGAATGATCATATTCATAGTTCCCAAAATTTTAAGGCACATACCACTATATCTCCACTAGGTAGGGCACAACACTTGACAGAATTTCTTGCCACTCCACCGGAAATAGTTGCATCAAAATTTGCTCTATCAATAACTGTGCTAATAGAAGATGCATTTTTTGCAGTGTTTAATGATGAGTATGAGATGCTTTGCCCATTTAGTTCAGAGGAGTTGGACTTTTCTGAAGAACCTCGTTTAGACCAAAGCGGCTCATCAGACTCAGAAATCCTTGCAAAGAAGTGAGAATTCTCAAATTTTTGCAGCAACAATGCAGTTTGTCTTTTGTGAACCTCCATCCTTAGAAGAGATTCACCAGAAGAAGCATCAACTGGGGGATCAGTCTTCTTCACTTTTTCCAGGTTTCCCTCTTTCTGCTCCTGTCTGCTAAGACTTAAATGCCCTTCATCAGATACTGAATCATTTCTGTTTTCAACATTTCCATTTTCTTTGTCATGACTGTGAACCATGCTATTCTTACTCATCACGGCAGCAACTTTAAATGGAGTAATAATCTCTGTATCCTGCTTACAAGCAGACAGACACGCTAGGATATTAACTTGTTCACCTGAATTCCAAACATAAATCACATCCTATCAACTTCCATGTGACCTGGCAAACCAAATCAGGCATCTAAACACTACGATCCATGTACCAGATAAAGAAAGAATCCTACCAGGAAAGAGAAAGGAACGATCTAGGGAGCGCAAGGACTGCATATCTGACGCATGATTCCACTTCTCAGGAAGTTCCTCTAAAAAAATAAAAATTCAGAATCATATCACATAAGCATATCAATCTCACACAAAGTATAAACAAAAAATATTTTATCCCCATAGCACTTTAAACCAATGGTAACAAAATCACAATGATTATAATTTCAGTCATGTCCAAATCTCTGCTGTGACTAATTAACAGACAGAGAAAAAGACCCATTTGGATCAAGTTCTTCACTAGTTCTAATAGGAGAAAAAGATGAAAAAGCAAAATGAATTAATTTCTTTAACTTATGCATAGTTAAAGTCATAAAGCATAAATTGGTTTTAATTCATGAGAAAACTCAATTCATTTTAACGTTTTAGAGCATGTTTGGATTGAATTTGGAAATGTTGTGCTGTTGTGCTCGCATTAAAATGAAAATCCAATGCATAAAAGTAAACTAAAAGCAAAAGCGTTGGATCTTATACTTTTGCCACAGACATACTTTTCCACCCATTCCCAAACATGCGTTTAGTGTGTGTTTGGTTTGCAATTTGAACCCACGTTCAACGGGAAAACACGCGCGTTCCAACAAACAAAAGAAAAAATAATGTGACAGTAACTTTGATTTCAACAGCCATTACGTTGAATTTAATTGTTTCCAAACACAACCTAATTTTCTTCTTTATAATGCTTACGGCTAAATTTATCCAAACAAGACCTAAACAGTTCAATTCTATGCTATATTCTCCTTGATCTCATTCTCACTCCTTAAACTGGAACTAAAACACTCTACTCCTGTATAACCTCATTTCCTACTTCATCAAAACAATAAACCAAACACTGCCTAGAGTAACGAAGAAGAACAGAGACAAGTTCAATTCGCGTTAGCGTTGAAAACGTGAAAATACATACTGTACGGAATGGTGATCCATCCTTCGTCATCGGAAACATCCAAGTGCTTAGGCAAAACGGCAGCGTCGTTAGTGGAAGCGACGCCGTTTTCGGCCTCGACCTGTCCTTCGACTTGCGCGTAGGGGTCGTCGGACATGAGTGACTCCAAAGACGACATGCTGTCTGCGCGAGGCTCCGGTGACGTCGGAGTAGCAGTTGCGGCCGCCGTCGCCGCCGCAGATGCCTCCGCCGTTGACGACGGCTTTTCCCTATCGGAGTAGACGTGCGTGGTGGAGCGCATCAAGAAATTCATGGTGCTGGTGCGCGTGTGTGTTTCTCTGCGAATCGGAATCGGAAGATGAAGATAATAATAGCAAGCAAGGGTTTAAGTGGAGAGTGTGAGAGTGAAGAAGAAGAGATTGAAGGATCTGAGTGTGGAAGAGAAGAAGAATAAAGGGAACCTGTGATCAAGGATCCAACGGAGGAGAGAGAATGTTCAATCTCGATCTGATTCTGCTACCTACACACTCCTCTTCTATCCACCCACGCTGCAACACAATTTCTTTCTTAATAACCACCGCACCAAACGCACCGTTTAGATCATGCCGTTGCCGTTGCCGTTGTTGCCTTGCTAATAATCCAGCTCCATCACAGTTTAATTACGTTTTAAGTAAAGAGGTTAATAATTATGTGCTATTATGTGAGATTATTTTATATTATATTGAATTTTGATAGATGAGATTTAAGTTGTGTATAGGATTTTAATGTTGTGGCTGTATTTTGGGATGAAAATCTTTTCTCCCAACTTAGTATTTCTATTTAATTAGCTATATAGTATATATTAAAAAAATTATAAAAAAAAATTCATTAAATAATAAAATTACAGTTAAGATAAAGGATTTCGATTCTGTATTTTGAACTATTAAAAAAAATTAAAAGTATTGTTGGTATAGTTTTTAACATCATTTTGTTATTAAGTTAAAGTTATCAATTTTTAAAAGAAGATAATTTTAGTAAAATTAATTTTTATATCAATTTCAAAAGAATTTTATGTGATTTTTGGAAACCAAGAAAACTCACAAATCTTAACTAAACTCATTAATATTCTCTCATCATCACCACTATAACTATCATTATTGTCTTTATGACTCTATTATGTGTTTGTCATTGTCATTGCTATTAGGGTATAATTGTCATTGTCGCTACCATTGTCAATTTGTCATCATTATTACCTTTGTGTCACTACCACCATTTTTTTTTGCAGCTATTGCCACAATTATCATAATTATTATCATTATCATTGTAATTACTATCACAATCATTATCGTCATTACAAACATTATTGACATTGTTGTTATTGATATCATCTCTCACTGTACTACCAGTACAATTATCACCACATTAACTATCACCCCATTACTCTTAACATCACCATTGACAACGATAAATTTAACTATTTATTTTTAATTATCTATATGTGTTCATACTTTTTACCTTGCATTATTTCATAGCAAAGTAAGACAAGATAAAATGGTTGATTTATTTTGTTCAACTTAAATTGGCAACTACTATTTAAAAACTTATAAAAAATAATTGAAACTAAAAACTCTACTAAAATTGTATTGGTTTATCAAAATTTCAAAACTAGAAAAAAAAAACTCAAACAAAAGCTTATGTCTCACTGTACTACCAGTACAATTATCACCACATCAACTATCACCCCATTACTCTTAACATCACCATTGACAACGATAAATTTAACTATTTATTTTTAATTATCTATATGTGTTCATACTTTTTACCTTGCAATATTTCATAGCAAAGTAAGACAAGAAAAAATGGTTGATTTATTTTGTTCAACTTAAATTGGCAACTACTATTTAAAAACTTATAAAAAATAATTGAAACTAAAAACTCAACTAAAATTGTATTGGTTTATCAAAATTTCAAAACTAGAAAAAAAAAAAACTCAAACAAAAGCTTATGTCTCTATTTGAAATGACGGGACAAAATTTGTAAAGTTGGAAAGATAAAAAAGCCAAAATTGTATTTTATTTTTGTTATAAAAGTTAACAAACTAATCATATATGTTTATTTGTGATTGAATGATTGTTTAAGATATTTTAGGTTAGGAATAATAATAAGTAGTGGGGAATGTAGGTAGTGACTTATTGTTACTCTTCTCACATAAAGAAAATTCATATGATTTATCTATGGAAATACCTATTTAAAATTACATATAGGTTTTTCTATATCTACGAGTATCTACATATACTCACAGATATTTAAAACAAAATTAAAAGATGGTTCTTTTATAAAAACATAGTTATGCATTTTTGTTCAAAAATAATTTTATATCAATAAAATTTGACAATTATTATTTTAAGTTGATTAATTTCACAAAAATTTATCATCACCAAACTAACCAATGATAGTATTTGAAATTATAAAGTTGGTTTGGTAGTAACTTAGAGAGAGATAAGGGAATAAGAGATCATCAGTTTGAATCTTTGCACGGATAAGTAACATTTGCACCTACAAAGAATAAGGATAGCATTTTAAGTTAACGAGTAAATAGTACAAAGTGGAGTAAAAAGAAATGTACTAAAAAATAGTAGATAATCATTTAAATTATTTGTTTAACAAATTTTAATAAATTTTATTTGTATGTGTGAATTTTTTTTTCAATACTTACATTATCAATGCTTAATCTATTTATAATGTTAAGGTTTATATTTTTGTGATTCCTTATATTAATTTTAAAATTTTCATTAACATTTTTAATTATAAACATTATAAATATAAAATTCAAATTTACTTAAATACTTCAAACATGAATATAAACTGATTTATTATAATATATAATAATACTGAATGAAAAATTTTTAAAACACCAAAATATATAAATTTGAATTCTAAATATAGTTATAAAATAATTGTCAACCCTAGTATTTTTAAATTAAAAAGAATGAAATTATTTCTGATTTGGGGGAATGAATTTAAATTATATCTAAATTATATCAAACACCATTAACATAATCCATCTTTTATTGTTAATTTATAATTTAAATAAACTTTTAATTAATTTCTAATTGCAATTTTTACTAAATTATATTAAGCATCTTGTTTATTTTTTATTATTTTTTATTTAATAAATTATTTTGAATAAATAAACATTAAGTAATCATTTAGTAAAATAATTAAATTAAAAGGAATGAAATTATTTCTAACCTGAGCGAATGAATTTATCTAATTTCATTGATTTTCAATTAAATTAGTTTTATTTTATATTAAAATTACACTATATATAATTATAAGTTTTTGTATATTTTTGTACAATTTATTTAAATGATAAAATATAATATACATAATACTTATAAAATATTGTAATAGTAATATTCAAATATAGTTGCTACCTTTCAAGATATGAAGGGAGGGAGTTAAGCATCATTTCTCATTCACCATGAGATGCATCCAAGAGTTGGTAATATTTTAGAAGAGAGGCTGAGTGGAATAATGCAAGAGAGGAGAGAGGCTGAGTGGAATAATGCAAGAGAGGATCAAAATCCAGACTTTTGTGGATGAGTTTACTTCAATTATTTCTTATTGGATGCCATCTAAAGAAACTTTATTAAAGATGTATCAAACTTGTGGCATCCTAATAATCATGTGTCGAAACTTGTTGTAATGTTCCCTACTTAATTAAAATATATAACTAGTTTTTGTTCAACTTGTTGTATTTGGACGTCTCATAGACTCCTATATTTTTTGTTTCATATTGTGCATAATGTTGTGCACAGGGGGGAGGGGGAGGAGGTGTTTCACCATACATACACCAACTCCACATTGGTAAGATATGATTTGCTTTGGCTAAAAGTACTCACAGTTTTACTTTTGGTTACCTTTCCAAAGATCTCTTGGAGGTGTCCCCATGTACATAAACTCATTTCATTCCTCATATAAGCCAAAACCCAATCACCAAGTTCAAAAACAATTTTCCTTATCCCTTGTTAACTTGCTTGGCGAACTTTCAATTTTCTTTTCAGCTATATCCACCCAGGTTTTGAAAATCGGACCAACTGGGGGTTGACAACCATTTTTTAGAAAAAAAATTATATGTAAAAAAAATTGGAAATGGTTCTTGAAATCTTAGGCACACAAATGAGAAGTACTCTAATAAGATATTGCAAAATAAAAAAAAATATTTATAAAGAATTTTTGCAAGAAATACTTAAGGATATAAAAAAAAATATTTAAAAGGGTATTTTACATAAAAATATTTAAAATTTAATAAGATGTATTATATTTATATAGTATAAATCATATATAACTCTTTTTTTTATTTAGTATATTACTATATTAGTTGTAAAATATAAAAAAAAATTATTGAATCCAGTTCAACATCGGTTCAAATCAATTGAACCTTTGAACCCTAAACTTATACCTTTACCAGTTCAATGATCGTCTGATTTTGAAAACCTTGATATCCGCTCATGCAATTTCTTCACATATTCAACCTTAGTTGTTTTAAGCAATTAGGCATTTGCAATAGATCAAGTGGTGTCAAAGGATTAAATCTATCCACAATTTCAAATGGTGAGTAATTAATTGTGTTATGGACAATCCTATTATAAGCAAGTTCTGCATCAAGCAAACATTTTTTCCAAGACTAAAACATTCTTAAGCAAAGTGTCGAAAGTGCTATTCATTAGCTCAATTTCATATGGATGACAAATAGTAGAAAAAGTAACTTAGTATCAAACTTACTCAGTAATGTTCTTAAAAAATGAATTTGAGAACTTATTATCTCTATCACTTATAATACTCCTTGGTCATCCATAGAATCTCACAACTTCTTAGAAAACAAGCATGTCAGTTACATAGCATGCATCATTATCTTTTCGACACTATGTAAAATGTGCCATTTTTTTAGAACCTTTATTATTATAATTAAATAAAAATATGTATAGTTGTAAAAAATCTTGTTTATATTTTTAAAAGATAGTGTAAATTTAATAATTTACATTGTAACTTCCATTTCATAATTATTTATAATTACAATTAATTATCAATAAAACGGTGATAATAATCATCTTTATTGCTAATAAATTGATGTTGATTTAATAGCTTATAAATCCAACCTTCAAATATTAGTTGCACTACTATATCATTTTTGTATCAAACCTAGACGTCTCCCTTTTTTCCTATCTCTCGACTTATTATTTGTTTTAGAGTTTAATTAGTATGCCCTGACGGTGTAAAATAATATTATACTATTATTTAATCACATATTTTATTTATATGACTTCTAAAGTATTAATTGGTAAAATCAACAACCTTATCATAAATTAAGGGTTATGATTGAATGTCAGTGTAACAAGTTTTACACTTACAGTGCATATGTTGTTTTGTTGGTAAGTTTTTATTTAAATAAAACTATGAGAAAAACACTTGTACATTGTCTATGTAAAATGTTTTATGCTGGTAGCTAATTACAAGCCTTTATATATAGGTGTGAAACTCAATTATAAGAAAAACAACACTTATACATTATAGTGTAAAACGTTTTACACTGGCAGTTAAGGACAACCCTTTATATATAGTATGTTTGATAACTTTTTCAATTAATACTTTAAAAGTCATGTAAATGAGTGATTATGATTAACCGTAAGTAAATTTTTTTTTACAGGGTAATGTATAGAGGTTAAACTCAACTATGATAAAAAACACTTATACACTATCAGTCTTGAAATGTTTTACATTGACAGTTAATCACAACTCTTCTCATGTAATATATTTGTTGGTTTTTTCAATTAATACTTTAAAATTCATGTAAATGAATGATCGTGATTAAATAAAGTATTAAATATAGTATGTTTATTAACTTTTTGAAAAAGTCGTGTAAATAAATAGTTGTGATTAAACACCAGTGTAAAAATTTTTTACACTTATACATTGTGAATAGTTGTGACACTTATACACTGACACTATATATATATATATATATATATAATATGTTTAAAACATTTTGAAAAGAAAGCTTTAAAGATTGTTTTATACTCAAATATATAAGTTATTTTGTTGATATAATGCAAGATTACAAAATTTGGAAAGGAAGTTTTAGTTGTTCTTTTTTGTTAACAACGCATGATACGTGCTGGTTAGACAGTTTTTTTTTTCCCCTCCAATTGAACCTTTTCAATATACGTAAAATCCGTAATTGACTTTTCTATCAAGATGTCTTTTGAAGGATTTTTTTAAAAATAAATAATAGTTTAATTAGTATTACTCTTATATTGATATTTAATCATATATTTTATTGATTTTTGCACTGACATTCAATTAAGGATGACAAAAAAATTCGCACCTGCGGATACCATGGATAAAACCCGTGAACATATCTGTATGGATAATATAAATGGGTACCCGCCACCTGTGGGTACGGTTTTTTTCTACCGCTCCTTAACGGGCATGAGTACAGGCGGATACACGCTATCCGCTAAACTAAAATAATATATATAAGTTAAAAAGATAATATTTTTTGGAAAATAACTCAAATTAAAATATTAATTATCAAAATTCATTGATATCAATCTTATTTTTTTATGAAAACTTCATAGTTAATAAAATTATTTATTATAAAAATACTGATAATATAAAATAAAGATTTTATTTGTATTAAATATTTTCTTATAATATATTATATTAATCTATTTTTAAATCTAATTAATCTTGTAGAAATTAGTATAGTTTTATTTCTAGATTTTTCAAAAAATAAATTATTTATTTGATAAAACTTCTTATAAAAAATATTTAATTTTAATTTTTTTTAAATATTCATGGGTACCCGCGGGTAATAAAAAAACTCGTGGGTATTTTTATAGTGGGTACCCGACGGGTTTTTAATGGGTAACAAATGACAAATTTTTGTAGCGGGTTAGGTGACGAGTAACTACTAACCATGCCCGCGTGACTCAATGTCGTTCCTACATTCAATCATAATCTTTCATTTTATGACTTTTAAAGTAGTAATGAGTAAAATCAACAAATTTACCATAAATGAAAGGTTGTGATTGATTGAATGTAAGTGTAAAAATATTTCTATTAACAGTGTATACCAATTAAACTCCTTCATTTGTATGACTTTTAAAATATTAATTAGTAAAGTTAATAAATTTATCATAAACTAAGAGTTACAAATGAATGACTTGAAAAAAAATTGTAATTGAATGTAAATGAAAAATGATCGTGTATATTAATTAAATTCTAGATAGTAACCAATACTTTGTTGTTAAAAAAAACATATAAAATATTTTTTAATAAAAATCATAACAACGTATCATAATAATAAAACGATCATTAATTCACCAAAAACAAATTATAATACTAATTAAAAGATTAGGACACATTAATATTTTTTTAACATTCATTTTGTTAAAAAATTAGTTGTCAAGACTCTTCAATGTTCTCATTTCTGAAAAAAAAAAAGAAGCAATTCAATAGTTTTCATTGAGTATACTTTTAAAATTATGAATATTTAATTTTCTGTGTGGATTATATCAAATATTTCTTCCATGTTGAATCGAATTTTTTTTTACCAATGCTTCATTCAAAAAATAATTTTTTGGTAAATGGTTATTTAATAAAAATATCATATGTATATCATTTGCCAAAAAAATTACCATCCTCATTTTAATTTCTCGAACAAAACAATTCAATAAATCTTTAACATTTAAAAATCAAGTATATTATTATTTAATTTAATTTTGTATTAAGACTAATTAAGTAACCGCTAAAATCTTATCTTTTACATAAAAAATACTTGAGTTTGTAACAATTAGGTATTAAATATATTTTTCAAAATTTTTCTTAAACCAATATTAAATTATTGGAAAATAATTAAATTATTAACAGTCAATTATTACTATTAATGTTGTTGTTATTGTTATTATTATAAAATTTTTTAATAATAATAATAATTATTATTATAATCTTTCTTAATTTCAACTAAATATAATTTTAATTGTCTACACATATTTTTTTAAAAAATATATAAAATATTTTTAAATAACCACTAAATATAAATATAATAAAATATAAATTATGTAAGGACCTATTCAATTAATAGGTTATTAGTGAGAGTGAAATAAATAGTACAAAAAATTAAATGTTTAGTTACACTTAAATTAAATATTATTTAAGGGTGTTAAGGTTAATAGTTTGTGGTTATTTAACTTTTGAACTAAATTTGAGTGTTATGGGAAATTGGTAGTTGAGGTGATTAATGAATAAAGTGATTTTTGAAGAATGAATTTGATTGGATTTATTCTATGTGATTGAAATGGGTAATTGTTAGAATGATATTGTAGTACTTGGAATTGTGATGTATGTTGAGAAAGTGTTTAGAGTGTTATTGGTTGCAGGCGGTTACAATTGGGTAACTTAGCCTTGAATGAAATGTTTCATGAGATACATTGATGTTAGGGATACAGTTGAGGTAAATGTAATTGAGAATATAAGATATACAAGTAGACAACAGTTTATGATTGTTAGATGAGTATTTCTTGGACTTGAATTGGTGGTAACACAGTGCAGATTGGACACTTGTCGCCAATTGGAAGGAGTTTTAAGCTGCCTTAGGTCCGAACTCAACATAGATATTCCAGAAAGTGTCAGGTCTTAACATGTTGTGTGAAATGCTTATATTTAGGGGAATTATGAGTGTGATTGATTTGGTTGATATCATGGTAGATATTAATTTACTTGAAATATGAAATTCATGTATCATTATGCTTACTCTTACATTGTGCGTATATTTGTATGACTGTGATGATCGTGTTTTGTAGGGAACAAATACTAGTGGTGATGGAGGAAGTCAAGACTAGTAGATGTGGAAAAGGATATGAGGTAGGAGATGGATTACCTTTTTGTAATATAAATAGTTTATGCTTAATAAACATATTAGAGTATATATTTTAAGCATGTATATGAACTATTTAGGGTGACTAAGTTGTAATGACTCAAGTTTTGTTATGTTTGAACTTATGTAAAAGTTATATTTTAGCTTCAGAAAGGATATGATATGCATATGTGTAAATACTATGCTAGTAATCACTTGAGTTAAATGGAGTACATGTATGAATGAATGAATTATATGTTAACATGGTTGAGTTGATTTTGACAGCAGAGATTCTGCTATCTGCAAAGTCTCACCTGAGTGACATGTCTTGCCTAATGAGAGTTAGCCTCTATTAAGCTTATTTTTAGTTTTGCATCTAGCAATAGGTCTTGTTTAGTGAAAGTTGTATTGAGTTATACTTAAATGGGATTTGCGCCTAGCGAGAGGTCTTGCTCAGTGCAAATTCCTCTCTATTTAAAACTAAATAGGTTTTTTGGCCCAACGACATGTCTCGTTGAGCAAAACCCCTTTACTGGGACAATCTAATACAAGGTCCTCACTGAGCAATGGTTGTTGCTGGATTTCGCTAGGCAACAAGGTTCGCCAGATGAGGCGATGTTGTGTATATTATGTTATATTTAATTTGAAATTTTTAGTTACATAAAAATGTATGTTATACTAGAATGACGGTATTGTGATGAAGTTTTATATTTCAGTATTTTGGATTATAAATTACATGACGAATAAATTAGATGTGAATAAATAGTATTAGTATTTTGGGATGTTTCACATCCTATACATCATGAATTTAAAATCTAGTTAATATATAGAGGTAATTACGTATGTACCCCTAACCCTAGAGGTTTAGTATAATTACAAATGCACTTCCTTCGTTTTTTTTACAGACCTCCCTTACTTTATGTACTCCTTACAGTTATACACCTCTTTCCAAAACGATGTAACATCATACATAAATTTATTATAGATGTACCCTTAAGTTTTGTATGATATTACATATATACCTCTTAAATTTTGTATGTTATTATACATGCATCTTCTATATTTTTCAAATTTTACAGTTGACACCCCCTCACCTGTTGTCGACACGTGGGTCTCAATGAGACGACGAAAAAGTATAATTTGAAAAACAGAGGAGTTGCCACTAATGTTTATTATAAAAAATATCAGAAAGTTCTTTTAAAAAATGTGGTTTGCGAAACCAAATTTTGAGTTCGGGAGTTTATTATGCATAGTGAAAGTATTAATACCCTACAATGTTCGTCTTAAGGACAATTACCTCTAATTAAACATATAAAATTAGATAACTTTAAAAATATTTATTTCACCTTTAAAACACAAATGTTGCTTTTATTTTATTATTGGTTTTAACATTTTAACAAGAAAAATATTATTGGAAAATTTATTTTTCATAAAAAGTTCTTAATATTTTTTTAATTAACTTATTTTGTTTTTATTTTTCGAGGCTTGATAGGAGTGGACTCCTACTCCTATGTATCTATATGTATAGTGGAGAATCAAAGTTTACACAGTTCTTAATAAAAATATTTGTGTATTGGAGACTTTTGATTTGGTTTTTCTTTAATTTTAATATTTTTGTGTTTATTTTAAAATATTATTACTGCGACCAAATTAGAACCGCATCCAAAGTGGTCGAGATGATTATTTAATGTAATTGTTAAATTAAAAGTGCATCTAAAATGACAATTATTAAATGGTGATATTTTTTATAATGACTAAATCAAGAGTGCATTCAAACTAATCATAATTAAAGCTTTACGTTTTATTATTTATATTTTAAAAAAAATTAAAGGAGTTCATGATAATCAAATCGAAAATACACGCAAAGTGATTGTCATATACCTTTTTATAATTTACAACAGTCAAATTAAAAGTGCATCCAAAGTGACTATTATTATACTTCTCCATTTAAATTAAAAATTTAAATAATAATAATAATTCTAACAACCAACATTTTATAAAAGAAACCAAATTAGAACTGCATCTAAAATGGTTATTTTAACTTTTAGTTTTTATAATAATCAAATTAGAAATGCATCCAAAGTGACAATCATTAAATTTTCTTTTAAAATAAATAATTTAAATGACGTAATAATAATTATAACAACTAAAAATTTTTATTATTAAAATTAGAAAAACATATAAAATGATTATTATAAAATTCTCATTTTTTAAAACAATATTATTATCATTACTATTGTTGCTAGATTTAATCGTTATTTTATTGCTTGTTATTTCACATATTGACAACAATATTTTAACTAGATAAAAATAAAGTATCTAATAAAAAGAAAAGGACAAAATAAATAAAAATAAAAACACTTACTATTTACACTCCATATTTGCTAAGTGCACCTGCATAAAAAGAGTGTGAATCTAGCAAGATTGATGGTGTAAACAAAAATCTAGAAAAAAAATTTTGGACCTTAAAGCAAAAAGGGTGCGCTTAACAGAAAGTGAGGGTGCAAATAATAGGCGCATGATTTGGGTAGGGGTGTGTTTAGGAAAATCGGGGTTGCAAATAGTAAACGCATGTATCAGGAATAGGTCCGGGGTGCACTTAGTATTTATAGGAGCGAATATTAACTTGTGCTTGTGCGCTTGTATTTATAGGATGTGTAAATAGTAACTTGGCCCATGAGGATTTGAAAGGGGTGTGTGCTAGTATTTGTGGGTTACAATTAGTAAAATGTAAATTAAAAAAAGAAGAAGGGGAGAATGAAGGGGACTCGTGCGTGTGTCTCTTGCACATTGGTCCTATATGGGATTTTAAATCCCTAAGAGAAGAAAGGTGTAGAGCATGGAGAAGAAGGAGAAAATGGGAATGGGGCATCCCCGTCGGTGTTGCCTCCGTTGACTGTCTTTGGTGCCACGCACACCATAAAAAATTGTTTTTGGTGGTGAACAATGTAGGTGATTTTTTCTGTCTTCTCCTTTGTTCTCAACCTTGCTTGTTTATAGTCAGTTTCTCTTTTTCCTCTTCTTGAAAATTTTTCTACCATTTTTTTGATTCAAATACCTCTTTTTATAGGCTTAATTTGTGAATTTTTACTCACAAATATTTTAATTTTTCTAGAACAAATCTTATATCTAGGATTTTGTGAGATTGTGTTGATGGTTACAGCTGAGGTAAAAAGCATCTCCATTGATTGTATAGTATATAAGCATGACAATGGTTCAGAGGTGTTACCACTTTCATTTTGTTTTCTTCTTTCGTTTCTCACTTCTTCTTTTTTTTATTTCTTAATTTTATCCATTGTTTTGTGTTGGAATCCTTTTTAGACTCTTGATGATTAGCGTATAATTTGAATGTGTTTTATATGTTGGACATAGTATGGAAACAACAAGACATATTTTTCTTTTCTAAATTTATTATTTGCACCTCCCAACTTGCTAAATGTACTCCATTTTGCCTAAAGGCAAAAAAAGAATTTAATTTGTTATCCATACCTACAAATTTTTTAGATACAGAAAAAAAATCAAATATTATTAAATTGTATAAAAAGACAAACAAAAATGAGTATCTACACTTTCATTGTTGCATTGTTTTGAAACCTTAAAAAAAAACTATTTATATCATATTGACACGAATAAAATATAATATTGAAAAAATAAATGGAGATCTATATGGCTTAAAAATGAGTGGTGCAACTATAATAAATACATAAAATAAGGGGTCTATGTAATTTGAAAAAAAGATAGGGGTATATCTGTATTTATAATAAACTTAAGAGAGTGTATTTATAATTATCTCTAATTATATTACCATTTTTTCTTAATTATCATTCTAAATTATATAAATTATTAATATAATTAACCTTAATACTACATTAAAAATTAAACACAATATTTATATTTTAAAAAAACCGATAGATAAAAGGGAAAGAAAAGAATGGTTATTAATTTTAAAAGTTTCGAAAAGGAAATTTGTGAGACACTATATGAAAATTACCAAAATATATGGAGATGCGGGGTATCGATCCCCGTACCTCTCGCATGCTAAGCGAGCGCTCTACCATCTGAGCTACATCCCCTTTTGTTATACGTTTGCTATAAGAACTTAATATAGTTATTTGTGGAGTATTCTTCTTTCTCTCTTTTACATTTTTCTTATTTTTTGAGTTGGGTTTTAATTCAATTTTTTTTTATCAGCTACTATTTTTACATTGAAACCTAATAGAATATTGAATTTTCAATTTTACTATTTCATTATTAATACAAAATTATTCTTTTTGGATCACTTTATTTGTAACCCATTTCACTGTTATGGATAATATATTTTGTGATACTTTAGCTATATGTTTCAGATCAATTGATCAAAACATATTATGTATATATTTTGAATGAATTAATCTGAAGTGTAAAAAAATATCTCGTATTCACTATTCTGGACATCTTGATTTGAAACACATCAGAAATCTATTTTGAACCAATTAATCTAGAATGTAAAAAATTAATTTCATTATTGGACTAAACAATTTGAAAATGTTACAATGTTTTTTACCACTTGGGGGTTGGGTTTTGGGGAAGGGTTGTCGAGTGGGAGTGTTTTTCTTTTCCGATAGGAAAATGTTAATCGTTGTATGTTAATTTTATTAATGAAAAAATTCAAACCACAATCTTTTCTTTTTCTTCTTCGACATTTTAGCAATGAAGGTGTTCTATTTGCAGAGCGATTGGGAGGGAAATGATTGAATGTCGTGGGTGGGAGCTTTGGTGACTTTGTGGGATATTTTATATGTTTGGGAGGTGCTAGCAGTGGTAGGTGTGATAAACTCTTCAATTTCTAGGAATTTGAATTAATACTCCTAATGTTTGAATCACACCTATTGACATATAAAAAGACGTATATGTCATTCATTTTATCTCTTTTTTTTTTTACTTTCTGACAATGATTTGCCGGAGACTTGGGATTTTAACTTCCATAGAGAATTGTAATTGAAAAAGCAGATGAAGTGATTTAAAAATATACATTTTTAAATATGTTAGCCTGACACTGACCTTTCGGGTGTAATATTGGATTCCTTGTTGACTTGAGCCCTATTTTCCTCCACGCCAGTCTTCCTCGGGGAAATTTGAATCATTGCTACAAGAAAGCTAAAAAGAGAATGAACTATGGAGGGTGACTTCAATATTGAGAATCCTTCTGTTGATGATCATGAAAATATTTCTCACATCAAATTTGATGAAATCGGTTATCGGTTGGTTGGAGAGAAAATTTTTTTACTTTCCAACAAACTGTTGCCCAATAAAAAAATTATTTTTTTACTCTCTAGCAACAATTTGTAGGAGAGTAAAAAAGAAAAGTCGGAGAGTAAAAAAGAAAAATAAAGTGAATGTCATATATGTCTTTTTATATGCCAAGGGGTATTAATTCAAATTCCCCTAGGATCATGGGCTATGATGCAAATAATTTATAAATGTCGAAAAAGTTTAAAAAAAGAAATAAACATTTGGAAGAAGAAAATAAATTAAAAAATAATATTAAAATTTTAAGTTAAATATTAAATAAAGATAGATAGAGTGAGAGAAAGGCATGTCAAGTGAGAAAGAATTTGTCAGAAATGGGAGATTTAATAATAACTATAGAATTAACTTTAGGGGTGTTGATTGTATTGTTTAATAAAAGTAATAAAGTCAGATTTCATAATAATCGTAGGGTTAACTTTAGTGATGTTGATCACATTGGTTATCAAAAGTAATAAGTGTTAGGTTTAAAAGGTCCGTATGACCAGAAACTCCTATAGATACTCTTAGTGATTTTAATGACAACAAGCACAAAACAATCAATAAAATGCAAGAAATATAAGTTAAGAAGATCGACATAAGAAGCATATACTTGGATAATACATAAAACGTATTAAGAAGATAAGAAGTACACAAAATAAAAAGGTATGTGTAAGAAACATCTACTAAAAAAAGACATTAAATATGTCAAGAATAAGAAGGTCCACTAAATGTGTTAAGAAGATAAGTAACATTGGCAAGTAGGTCTTATATACATACTCATAAGAAAGTCAGATGCAATGACAAACAACAAAAGATTAGAAGAGTATCTAATCATCTGTTTACAAATATTGACTATCTACCAAGAATCGCTTGTATAATACGATATCATATCATGCGTAAACACATTATCAATCTATCAATATATGACCACCGAAGACAATCTCATTACACATACATATGTGATGATCATTTACGAAAGAAATTAGAAGCTCTTAAGCTTATCAGACCATCTAACTTATAGTAATTTATAATTTAGATATATAATTATAGAAAATTATAATTTAAATATGTAATTTAAAATTATATATTTAATTATAAAAAATTATAATTTAAATATATAATTATAGTAATTTATAATTTAAATATGTAATTACATAAATTTATAAATTAAATATGTAATTGTAATTTAAATATATATTATAGAAATTTATAATTTAAATATATAATTAATTTATATTATTAAAATATGTTATTACTTATTTTAAATACCTAATTGTTTATATGATGATTAATGATGCTCTTATTTTTTATTTTATAACTTTTAGTTAGTTAATCAATTAGTTTTAGCAAACAATTACAACTAACTTTTCAACTTTTATCTAATTTTTTAGCTTTCAACCTTTCAGCTAACTTCTTAGCTTTCATATAATTTTTCAACTAGTTTGTCAAATACACCCAAAGTAGTTTTTTTTTTTTATAAAACTAGTAGTTACTAAAAACACTTAAATAAAATAAAAACCTAACATACTCTTCATAACAATTATGTTTCCTCATAATGGCTTTCTCTTACCAATACCGTTCCATGGAGGTGATGGAGTACGGTTAATCTTGTAAGCTTTTGAAGCTACTTACTAATTTTTCTATCCCATTTAATAAAAAAACCTTTGTTAAAGATGTAGTTAGTTTAAATAAGCACATTAATATCAACTATTGATATTATACTTCTAAACTTACCTCTATTTGTTTTATAAATTAGACTATTCACATTTTTAAATTTGAATAAGAGAGAAAGTAAATTGTTAATTGATTAATAAAAGCTTTAAAAAGAATAATTAATACATTTAGAAACTAGGATATTTTTTATAAAAAATACAAATTATTTTTAAAAAGTTCTTATAATTAAAGACTGATGGTGTATATTAATAATAATGTAAATTGTTCAATCACCTTTTGGTTAAAAAAAACAAATTAAGGGTATTGCGTAAAAAGAAACTATTGATGAAAGTACATTAGTAAAATATCAACAACCATCAATGGATTTTGATTTGTGAGCCATTTATATGTGGCCCATAAAATAGCAGATTCATCAATTATTACCACTTATCTTTCAAATTTCATTAATGGGGCGAAATTAAAACTTTCATCATTCTCAAAGGTTCATTACCATGCGGTCCATATGCTCGTCATTCAACTTGAAACTCTCAAAATTTTGACCATTATTGGGATTGTAAATAGTATGAGTGGTTGGCAAAGAAAAGTTAAAAGAGGACCATCCACTCTCATTTGTATTCTTCACTAGGCACATTAATTTACTCATTTAGTGTGATCCTTTGTTAGCTTTTATTGTATTGTTACGCATTGAAAAACGTAGAAATGAATTATTAATCAAATGATTTGGATAAGAGTGTCAGTGTAAAGATTTTTACATTTATATTCAATTACAATCATTCATCTATGATAAATTTGTTGATTTTATTCATTACTATTTTAAAAATCACATAAATGAAAGGTCAGGATTGAATATCAGTGTAAAAATATTTTACACTAACAGTGTATATTAATTAAACTCTTTTGATAAATTTTTAAGGAAAAGAGTGAGAGTTTAATTGATATACACTGTTAGTGTAAAAGATTTTACACTAAAATTCAGTCATAATTTTTCATTTATATGATTTTTAAAGCACTAATTAGTACATTCAAGAAACTTGCCATGAATGAAAGGTTGTGATTGAATGTCATTGTAAAAATCTTTATTGACAGTGTATATTAATTAAACTTAAAAAGTGAAATGAATAAATATTTCATAATTAGAATTAGCCTGACTTATATATAAATTAATACATAGAAACTCTCTTTATATATATATATATATTTTTTTTAAAAATATGTATTTTTTTATAAATTACATTATGCATAAATTAATTTGAACTTTCACAAAAGTTTATTTAAGTATTTTTCTTCTTATTTTTTAAAAAGTTTTCTTGGAGAAATTTATCCAAACATATCTTAAGTACTATATTTGTTCCTTTTTATAAGACTCAGTTATAAAAATTATGCATATTTTTTTAAATCTACCCATAACAAGATTAAAAGACAAAAGAATTTTAAAATAAAGTCTTGTAAAAATGGATAGAAGTTTTTAAAAGATAAAGAATCAATATCATAAGTGCATTTCAATATACTAACTTAAAAGTAAGCCTATGTTTGATTTAATGTTGCGAGACTCCCAAACTCTTGTTGAATTAAAAGTTACAAATTCAATGAGCTTTTATCTAAACATGTGGTAAGGAAAAGAAACCATATACCCTACAAAACAAAGAGAAAAAAACTTATATACTATAATTATATAATTCTTGATATGATTTATAACTATTTAGTTGTAAACAGTTAATATAAAATACACTTATGATGTTGATTTTTTATCTTTTAAAAATTCAATTTAGTCATTTATGTTTTTAAAGTGAATTAAAATGATTTTTTTAAAATAATGATTATTTTTTATTTTTAAACATGATTTTGAACAAATTTTATTAATTTGAGATGTAAAACTTGTTCTATTATATTTACGTATACGAAAACTATGGAATCCAATTTATGCTCAAGCCAAAAAATAGCACAAACAAGACAAAAATTATGTACAAAGTTAATCCAATGAGAAACAAAAAATTAAAAAAAGTTTAAATCAATTTTCTTTTTATGGTTCATCAGACTTATTGGGTGGAGTAGTGAATGCCTTCGAGAGAAGAATGGGGTTGTGACGCAGAGTAAAAACAAGGATTTTTTTTATTATTTTTATAAAATTTAAATTAAAAATATATTTAATTTTTTAATTATTTAAAAATAAATTATAAATAAATATTAGAAAGGGTGTACTTGGCCTATTTAAAGTTATTTAAATTTTAAAATCTTTAATTAACATCTTTGGAGTAATAAATTGAAAAAATCTTAAAAGAGAGGTAGCATTACCAAAGTAGACCAAGATTTTATTTTGAGATCTCTTACTAGAGATGCTCTTATGTAGTAGATAAATTCTATGCAATATTAAAAATATATAATTAAAACTATAATTAACTTAATCAATAATAAATATTCAAAATAAGCTCGTATTGATAATAAAAGTTATAAACAATATAAAATATTATTGGTTGGAGTATTAATCATTTATCACAACCATGAAAAGATTCTTTATATTTTACTGAATACCACACACATATATAATATATATATATATATATATATATATATATATATATATATATATATATATAAATATAGTTAATTTAATCTTTTGACGTCCATGTTTGAAATGGAGTATTAATGATAAACTCTGAAACAAAAATTAAAAATTACTCTGAAAACATGTATAACTATCAAATCATATATAACTAACATGCGTAACTGTGCCACTATTATTAAATGGAGTATTAATGGTTTTTCACCACCATTAAGATTAAGAGATTCTTTATTTTTTATTAAATATATATAATTTAAAATCTCTCCTGTAAAGAAATGTAATTTAGTCAAAGAAAGAGACGAGGGTTTCATATAAAAAATAAGTAGTATTAATTGATAGCTTGTTTGACTAATGAAGCTCTAGATAGGGCCAAACTTCTCTGCAATGTGAAAGTGTAGAATCCATTTGCTCTCACCTAAATTAACTACTCTTAATGAAAGCCCATTTGATATTACACACAATTGATGTACCCTTTTTCCTTCTCTTCTAACATATAGAGATTTTCTAATTTCTCTTCTATTATATATATATATATATATATTTCTACAATGCTAGAAAATTGCTGAACCACTCTTAATAAAGTTACAACCAAAGAATGGCTTGAAAAGATTTTGATGATGATCAATGGCCTTGTAAAGGCCTTATATATATATACCATTTGAAAACTCCCCTTTGGAGTTTTGTTCATCATTATTCAGTTGTAGCAGTTCCTGCGCCTCTATATTTGTATCTGATAGCCCAAAACAAGTAATGCAAGAAATTCAAAGCACTTAGGACACACATAAGCCAGTAAAACCTCTCTAGGTGATGGTGGTTAAGGTTGGCCCCAGAAAGCCATGGTCTATGTGAGGTGTTGCCAGTGACACTATTTACAATAGACACAATTACTGAACTTAGGTAATATCCCACAGCCAAAGAGGCCCAAGAGAGTGATGTGGCCAAAGATCTCATTCTACTTGGTGCTTCTGTGAAGAAAAATTCCAATAACCCAGCAAGGGTGAAAAGATCAGCAGAACCAAGGAACAAGTATTGGAATGCAATCCAAAAGAATGTGATAGGTAGTGGTTTTGTTGTATCATCCAAAAGGCCTGAGTGAGTAGCCACACTTTTCCTTTTCACTTCAACAACTGCTGCCACTGCCATTGCCACTATGGATAGGACTAGTCCAATTCCAATTCTTTGGAGGTGGGAAATTCCCATCTCAGTTTTGGTCACTTTTCTTGCAAAAGGGATTATGATGTGGTCATAGATTGGTGCCAGGATTATGATGAAGAGCACTGGGAAGATTGGTAAGGAGGCTGGTGGCACCTTTAGGGAACCAAGTTTGGTGTTCATTGTTGCAGCTTGTTCAACAGAGAAAGTGGATAGCTGAGCCAGACAGCAGTTTAGCATAATGGTGCAAGCAAATATGGGAAGCATTTTCAGCACTATCTTCACATCTTCTACTTGCTCCACTGTGCATTCCATTGATGATGAACACATAGGGCTGTTTTCTACTGCTCTATTCAGGAACTTGAATGTGTTTGTTAGGGCTTCAGGTTCTTTGTTTGCTTCTTTCTCTACTTGTTTTCTACCTGATGAGTGTAGATTCATGGAAGGGCTTGAAGTCATGTTCACCACTGCACTGCTTGAATTTCTGTTGAACCAGCAGTTCAGTGAAGCAGCAATTAGTACCTGCTTGGCCAAAACCAGGAAGCACACTTAATGCTAAGAGTGAAGATATATAATGGAGCATTATCAGTTGAAAAAAGAAAGTTTTATAAGGCAGAAGCCACTCTAACATTTATTTAGACAAATTTCTAAATCAACAGTTTATTAAAATCAGAATTTGAAGAAAACAAATGAGATTATAGAAATTGAAATGTATAGATTAATTTTAATCAATAAAATAACTTGATTTTTTATTTTGTTCTCTAATAAAGACCTAAAAGCCTTACCTAGAAGCTATTTCTTTCTATTTTTTTTCTTTAAAGAAGCTAATTTACTTTCAAAAATCTTTTTTAGAATGTTGTTAGGTCTATGTTGTAAGTGTATCTTTGGATAACTGTAAGACTCATCAAATAGAAAAACGCACATTACAATGTATTTGAAACTTGCGAAACAGAAAGAACGTGCATTTTAAATTTTTAATATACTAAACTTAAAAGTAAGTGTATGTTTGATGTAATGTTGCCACACTCTCAAAACTGTTGTTGAATCAAATAAAAGCTACAAATTCAATGAGTTTTTATCTAAACATAAGGTAAGAAAAGAAATCACATACCCAAAAAATAGAAAAAGAAACATTATTAATGCAAAAAAGTTTTATACTAACCATTAATTATAACTTTTTATATATAATTAATTATTAAAAAACCATATAATTAAAGGATGGTAATGTGACTGTAATGTGCATAAATAAACTAAAAAATAAATAGATAAAGATGGGAAATATTTCCTTAGAACTAGGCATACAAATAACCAAGAGAAAAAAACACAAAATAATTAGTATTAGTTATTACCTTCAAAATGGTTGTAAGGGGGCTACCAGAAGGGATCTTGCACCTATAAGTAGAAGAGCCAGCCAAGAACAGTGGAATGGCTACAAATATGGTTATAGTAGAGATTCCAAAACCCCATTCCCACCCTTTGTTATCTTCAACCCATACTACAAATGTAACAGCAATAAGGGCACCACATGAGAGGCAAAAGACAAAGTAATTGAAGAAGGTTGATCTCTGCTTCCTTCCTGATGGGGAGTTCTCATCAAATTGCTCAGCACCATGTGCAGGCAATGAGCCCTTGATTCCCCCAACTCCAAGAGCCGTCAAATAAAGCCCACAAAACAGCATTGCTGCTTTTCCACCACTAACTTCATGGCATGGGGTTGTTGATGGGACACACACTGGTGGCTTTAGTGAAGGCACACGAGCTTGCACAGTCAGCACAATCAATCCCTGCACACACAAGTTCCAATTCCCTTTAGCATTGTGATGCTATGCAAAATAATATAGAATATAACCAAGTTGACTATACATATGGGTTTGATCTGTTTAAGATTTGTTCTATAAAATTTGTGTTTTAAATCAAATCAATTTTTTGGAGTTTGCCAAGGTAGTGAGTTTGTACATTTAGTTCACAAAAATTTTCGGCTAAATAAATTAATGTAGACTAGTGAGATATCTTTTTAAAAGTTATTCGAAAGGATTTTTACATATGTATATAAGTTAATTTTAGTTATAGATAAACTCTTTCATTTATTTTTCTTAATTTTTTCCCTTAGAAGAGCTTATGAAAAACTCATCTAACATGTTTTAATTATTTTCAGTTTGTTTAATTTAATTTCTAATAAGCTATCCAATCTGGTGTGGAATGAAAAACCTTAACAAAATATCATCTGGGTTACCAATTTCAAATGGTAATGCACATATATACAAAATTGTATTTTCACATAAATTTTGTACATAAAATTATATAATAGATAAATATCTACTAAGAAAAGAGAGCGTGGATAAGATGAAAAATAAACAAAAAAAATAAAATAATATAAAAGTAAATCCTTACGAACTAATATTCTAAAGATACTAACTATTAAGGAATCAATAAGCAGTAAGTTTTAATTATATTATAGAAGTGTCATTAGCAATCATGAAGGAATATTACTGCACCTTGAATAAAAACTTTATGTTTAATTTTCTTAACCAATATTTTAAAGATACTGATTATAGCATTACCCTATTATTGCATGAATAACAATAACATAACTCACTACTAATGTTTGAGTTCTCAATGCACGTATGAGCATGGAACTGTACCAGGTCAACCACTGAGATACCATACAGAGTACAACGTGTACCATTTCTAAAATGTGACCAAATAAGAAAATGTCAGCATCTGTTGATGAAAAATGGGCACTTAAGTGGGGCTAGGCCATGTGCTCAACCTCACTTCAGAACCTGGATTATATAGCATAGACAATGACTTATAGTATTACTCTATTAACTACACATGTCTTGATCCATCACTGTGAGATTTTGGCGTTTTAAGTAAGGTATATTCCATTCATACACAGCTAGTCTTAGAATGAAGATATTTCACACAAAGAAAATTAAAATAGGTGATATAATAATCGTGTAAAATATTATTAATAGAGATTGAGACACTTCGTATTATAAATATTATTCAATTATAATTTATAATGGGTTTATTAACTTTTATTATAAATCAGATAAACGGTTGAATATGATTCAACAACATATAAAATTTTTAATTGAATGAATATGATTATCAAAATTATATATCCTTTTAAGAAAATTCGGAATAATGCTTATTATTAATAGAGCTGAGACAATTCATGTCTCTCTTTATATTTTTAAATAAAAATAAAAGAAAAAAATTATATAAAACATAAAAAATGAAAAAGAACAAAAATTTAAATAAAATATATGATTAATATTTATTTAAGGAAAAATATTTAATTTAATGTGTCGATTAAAATGGAGAATTCCATCATATATAAATTATTATTATTTAAGGTAATTAGGATAGCTATAGCTTAGGTTTGGCCTGGTTAATTAAAGTTGTTTAATTCATTACAAATATCTTGAATATACCTAATTTCTGCCCCACATTGATAAGTGTTAAAATATATACTTTTGGTGTATAAATTTAAATATCATGAATAGTATTAAATACTAAGCATTAAAATAATACACCTTACAATGGACCTTATAATATACACATCATATCCTACAGTCCAGTTTCTTTTGAAATTAGAGAAGGATTTGACTTGGAGTACCAAGTTAGATAAGGTTTTACATGTGGCATACCAACTATAAACTAAGCATTAAATAACAAGAATACAATAATATCATTTCATACAAAAGTACTGACTTTTCAACATCAATTTTTATTACACTTCACTTTATATTCACTAGAAAAAAGCCTGTGTTACTCTCTCAATTAAGTGTGACGTGATATATTAAATGAAATGTAAGAGAGTATAAATTAAAAGTGACGTGAAGATAAACTGTTCATAATAATGTTACAAAACAAAATATATTCAAGATCAAAGAAGAAATGCATTTGAGTACATTTTGATTTTGTCACCGACCAATTTTTCATAGTAATTCTTCTAAAGATTTTAATGAGTTAATTTTGGGAAATAAAAAATGGAATAATTTCCAAAGTATTAAATATTGATTTTGGCACGGACCAATTTTTCATTAGTAATTCTTTTAAAGATTTTAATGAGTTAATTTTGGGAAATAAAAAATGGAATAATTTCTAAATTATTAAATATTAAATAATGTAAAAAGAGGGAGAAAATTGGTATATGAAATAAGGGTCCTTAGTTATTAGGCCTAGGAGGGGATAATAGCGTACAGAGAAGGGCATGTGTTTTTTGAGAAAGCCAAAACGACAACAGATGTTACTTTCCATGTTCAAACTTGACTGAACAAAGTCTCTATTTATGCAACATGTGGCAGTGGCACAAAAACATAGGGGTCCTAGGCATTTTCAAGGAGATTAAATATATGTTGCATGAATGATCAATATAAATAATTGGGTCCCCCTTTATCTTTAAATTAAATTAATTTTCTTCTGACACCAACATGTACAATAATAAAAATACTAGATTCATTTTTATTAAAAATAGAGAAAAACGAAATTGGAAAAAAAATACAGTATTCAGTAGATATTATTAACACATCACCATGATAGTATAGTTTTTATGCATATATTGATTACGTGTTTGAATAAATTGAAAACTGATTTTAAAATAAGTGATTTATGTTTGAGTGTTTAACGTAAAAAAGTTACTTATGTTACTCTAAATTAAAATTAATTATGAATTCTTTATTGACACAAAATAAAATATAAAAAATTTATTTAAAATTAATTTTGAATCCAGAAGTAATTTTTGAATGTAAAACTTAAAAATATTTTCAAACACAAAACTAAATATATCACACTTTATTTAAAATAAATTCTACAAACAGAATGAATTATATAATATAAAAAAACAAACAAACTAATATGAAGAGAAGTAGAAAAAAAACGAAAACTCTCCACCAACATTATTGTTATTTTGTCTCATCCACTCTTATGTGTCACAAGCCACTTTTTTTTCTAGGGTACTGTTTGTCTTTCTTAGCCACCACTAGCAGTAAATATCACACACATTTTGGAGTTAAGGGTTGGCGTTGTACCAATGTGAGGAGAGAAAAAGCTACCTATATGCTTTTCTTTTCTCTCTCTACCCTTTTTTTTTTCTCTTTCCCTTTCCCATTTGGTGCCTTAAAATATGATTCTTGACTTAGACCAGTATCTTACTGGGCGTTCGCTCATGCAATTCATGAGGTTTTCTATGACCAAATGTGCAAACGAATGCAGCAAAAAGAAAGCAAATCAAAGGATGATGGATAAGACATTTTTTGAAATAAAATTATTATTATTATTTAAAAAAGAAACAAAAATCATTGACATCTTTTCAATTCTATTATGGCGTTTGCCCATCTTGCAAGTTGTGTCTATTGCACTTTGCAACTTGCAAATTGACTCAGATTCTATGGTTTAAGACACACACACATCATGGCTTTGAAAAACGCTTGCTCTTTAAGGAACCCAATACTAATCAAAACTCAATCTCTTATGTCCCCTTCTCTCTCACTCTTCCCAATCAACAAAACCATAATGGGAAAGGGTTAATGAACAAAAAATGCAAAATTAAGGTATCATCAATGATTGCATATATAACACAAGATTGTGGAGTAGTGTGTGAAGGAAATTAAAGTGTTTGATTAATTTATATTCACAAAATCATAAGAGAGTGTATGCATACCAGAAATTCAATAACTGCACTTATCAGGAAGATGTGATAAGTGGTGGAAAAAGCATCAGATAAGAAACCTCCAAGAAGGGCAAGAAGAAAGGCAGTTCCCATGAAATTTGTGACATTGTTGGCAGATTTAGAAGGGGACATGTGCATGTATTGCCTCAGATACAGCACCAAATTGCTTGCATTGGCTAAAAATGCCAGATTCTCCATTATCTCCACCACTGCACAAAAAACCACACACATTCAAATTAGTGCCACTTACTTAGATTTGTTTCTATCATCATTAATCACACATATATGAAGTAATTAATCAGCAATCAACTAGTCCAAAATTGAAACACACTACATATATCAATATATATATATATATGTAAACAAGATTATTATAAACATTTTAGCCCAAATAAAATTATAAACTTCTGACATTGTCTTTCATTTTTACTGAAGAAAAAGGTACTGAGACATAGAGAAGAGAATTTAGGACAAACCCAAAACAAAGGAGGCTGCAAGCATGCCACCATGGCGGCCTTTGATAGCAGGCTTGTTTCTCCAGTTCACATAGCCATCCCATCTGGTTATCTGATTTTGTTCTAATTCCTATACAAGAGAATTAGAAGGAAATTAAAAAAGTGTGAATTGAATTAAATTAAATTATACACAAAGTAGCATGTGATATAAATTAAGTAAGGAGAAGAAAGGTGAGAAGAGAAGAGTGCAAGAGGTAAAGGGGGAGCAAAAACCAACCATGATTCTCTTATTATTTCTCTCTCTCCTCTTTTTTTAGGTTTGGATCTGTGAGAGAGAGTTAGGGGAGAAAAAGGGTGCTGGCTGGTGGAGGATTTAAAGAGAGTGGAAAGGTGCAACTTGGGCAGAATGGTCTACACACTAGTCTGAAACTATTAAATAACAATTTGACTTTATATAGATATATATATATTTTTTTCTATATACCCTTTTGCAATTTTAAGAAACGTATATTTGCCTCTCATGCAGTTAATTGTTCGTATATTTGCCTCTCATGCAGTTAATTGTTAAATTCATTATTTTTTTTTGTTATTAAATGAATTATTAAATACATACATGGCATCTATTAGAAAAATAAGTAAAAATAATATTTTTTCACTGAAAGAATATTATCCCTTTTTTCCTTTTATCCATATTTTTTAAGGGGTCTGTATGTATCCTTTTGTGTAGTGGGAATTTAATTCATTTTTAGTTGTTATTATTATTACTACAAGCAAAAACAGTTTTGTATTTTATCTTGTTATTTTATTTAAAAGTAAGTAGGTGAAAAATGTAGATGAATTAAAAATATTAAAAAAAGAAAATATAGTGGTTTTGAAATTATGAGAGAGAAATGAATGTGATAAGAGAGTTAAGAATAAATTGAAGAATAAAAAATATGTGTACTAAAAGGATTTTTTTTTATTATTTTTATAGATTATATACAAATTCACTTAATGATTTTTTTAATTTGTTCTTACTTTTTTTTTTAAAATAACATGAATCATATATATTAAAAAGAGAAATGAAACAAAACTTTTCATCCAAACTATACATTCACAAAAAGGAAGTGGTTAAAGTCTCAAAAAATATATACCCTACTTATACTTTTGTCACTCAAAACCCTATGAAAATCTTGCATTTTTAAAAGGCACTACGTAGATAAATACACCAATCAGAAAATAAAACCCTACTATTTGTACCAAATCTATATAATAACCAATTCTATGAGATCACCTGAATAAAAGACATCATATCTAGAAAATCCACTATTCGATTATTAAATACAATGAAATTTTTAGATATTTATATACACCAGATAATCACATGCTAAAAAAGAAATCCACATTTCCTTTAATTATTTACCTACCACCCATGCTTCAAACATATGACATAAAAGAAGCAAATCATCTGGTAATGAAATTAGGGCATGAGAGAAATAAATATTTGACATCGTCCAAGGTTCTTACTTTCTTATCACTTGCTTGTCATATCGATTAATTTTTCTTCTCTTTCCATTTATTATTTTTTTAGTAACTCTTTTCATTTATTATTCGTATCTATTAAACTTTAAGAATAAAATGATGTTTCGTTTCTTAATTTATGCTCACCGACAGCAAAATGAAATCATTTATATTCATAAGCATTCTTTTTATATATATATATATATATATATATATATATATATTCGATTTTAATTTATATTTTCAATGTAAGAAATTTATAATATCAACCAATTAAAATGTATATTGAGTCAGGTTAAAAAATAAACGATTTTAAAACAAATGATTTATTTATAATTAATTTTTATAAAAATAGAAAGTTTTTATGTTTATATATAATTGTAAAAATTAATTTTTTAAAATGTATCATCTTTTAATATATCATAAAAAAAATTAAATTAGTTTATTTTAAAAAACTACTTCAAATATTTTTAAAAAAATAAGTTGTTTTTAGTTTTTCAGTTGAAATATCTAAAAAGTTACAATAAATGCTTACTCCATAGTTTACTAATAATAAAGCTTAATTATATATTTAATTTAAAATGTGTATAATTTTCAAATAATTAATTTTTGAGTAAATAAGATTTGACTCTTTATTATTTAACATAATTTAATCATTAATTATTAATTGTATTTTTCATAAGCATTGCTCTTGGACTTTATTCAAGTTTACTATCTGATATAATCTTATTTCATATATATGGAAAAATTGCTAACTGCCAAAATTTATACACAATTAGGGTCTAGAAAGGGCATGTTATGAGATTTTACGGACTCAAATTTTATAATCTGGTGGTTTTTCAATTAATTTATTTTTTAATAATGATTATTTGTTAGTTGAGTTTATTATATTAATTAAAAATATAATTTAATTTATTTTTTATATTAAACACCTAAAAACCAATAGAGTTTAATTGGAATACATTTTCATTGTAAATATTTTTATATTGACATTCAATCACATTCTTTTATTCTTGGTAAATTAGTTGACTTTATTTGTTAATACTTTAAAAGTTATATAAATAAAAAGTCACGATTGAATATTAGTTGTAAAAATCTTTTATACTGAAAATGTATACCGACTATATTCAAACCAATATTCTAATTTTGTCACTATTCTCTAGCTATCATTAATAAAACATCTTCATTTTATTAAAAGTTGCATAGTTTTTATTCTTTGTTAATATACTTATGTCTGTTATTTTGGTAAAAAAAATGAATGCCTTCAAAATTTATTTTACATAAAATTTTTAACGTAAAATAAAAAAATACAAACAAAGTTAAAACTTTTTAATCACAAATCACATTTTAATTTAAATAAAAAATAAAATGATAAAATAATATTAATTTTTATATATCTATATATAAGAATAATATAAAATAATGTAAAAAATATTACATAAAACTAAATACATTTTTTTTTAAGGATTGGATTTGGAGTGGTGGCCTTTCCTATCAGCACACAATCCTTTACATTTTTGTATTTTGGGTTGCAACATAGATTGTATTGAATTCCTTTCAGTGCACTTAATTAGAATTGAATTGAGTAATGAATTCACCATTTGATTTAACTACATAAAAGATTATAAAAAAATATCAATTTTTTTTGGTAAGCCTAAAAAAATAGCAATTAATTCTTTTGGTCATATGTGAGAAACTATGAATTAAAAAACCTGATGCTCACACTTTTTAATTGCAAGCCGAGACATTTTATTTTGGTTCTATAGATTAACTCAATCTAATAATTGTGAATTGTAAAATAATTTTAGTGATTTTATTGAATACTAAAGGTAAATTGTAAAATACCCTGATGTCTCACACTTATTTAATTGTATTTTTTTTTTATCTTTGTATTTAAGTGCGGGTTAATGGTGGATGTCAGTTAAGAATTTTGAATTCAGTTATGTAATTGTAATGTGCAAACTTTCCCCTATCATTTCTGGTAACTTGAGTGAGTTTTACTTTTGCTAAATAAAATTTGTCTTTTTTTTAAAATGGTAAATTATAAAAGAATGACGCAATGAATACTAATTATTGCTGTCTTATAAGAATTATGAAACAATAAGCAATACCGACGAATTATTGATTTTGAGGTTGTTTTTTTCTTCAAATAAGAGGCTATAATATTGTTTTATTACTAAATTTGATGATCCAACCAACCCTACTCAATTAAGGTTGCGTTGGATGGCTAAAATAAAAAATAAAAGTTAAACTAAACATAATTAAATTTAAATAGATTGAATTAAAAATCGAAATAAATTGAATCTAATCCATGCCGATCAACCATATCTAGTAGAATTTATGATAATTATGTAGAACATTGTGTAATGAATTAAATTAATGCTAGTGCATTAATTGTTGTTTTGTTTTTCTTCAATTAAAGATAAAAATATATGAAGAAATTATGCTATTAGTTGTTTAAAGATTATCAATTTAACCATTGTCATAATGCTTATATTAATGCAAACTATAACTTAAAGTTACATCCAATTAACACATAGTAAAATATTTTCACTAATTAAGACAATTGAAAGATATAAAGATTTTTTTTTTTTAAAAAGGTAAATTTTATTCGGCGAGATTAACATTCCTCCATGTCACCAGGAATGACATAGAAGTATGATCAAAGTATAATAGAAACATAGATCATCCACACAATATAGTTCCCCTCCACTAGAAATAAAGTCCCTATCCAAAACAGAAAAATGACTTATGTTTATCTCTTGCTAAGCTTACTAAAGTAGTATATAGGCTGAATAAACCAATCATAGAAAGAAACAAAAGAAGTCAGAGAGTTTTTACAATAACCTTTGACCTACAACCAAAATCTTTGCAAAGATTGTTGTTAAACCTATTCTACATTGAAGGGAAGAACCTGGAACACTAAAACATTCCTTGCCAACCAAATACTCCACATAGTGGCCAACCAAATAATGTTGAGTATATGCATATGCTCTTTCCCACTGATATTCACAATCCCTAGATGTTGCCTTAGATGAGATTGACAATCTAAAGGCATGACACATAAGGATCCTAACCATCGATGGTATTTCATTCAGACCTGATAGCTAGATTCACAAGTAAAAAACAGAGGTTCCACAAATTCCAGACTTTTCCTATAAACAAGGCAAGAAGTATCACTTGATAGTAGGATGTTATGCTCTGCTAGCTCAACCTTAGAAGGATCCTGTTATGGACTACCTTTCATGCAAATGCTAAGACCTTAGAAGGCACCTTAGACTTCCATAACCTCTTAAAGAATTGTGAGTCATAATCTTGAGGCTCCCCACAAACTATTCTATAGGTTTCTTTTACTGAATATGTTGCTTCATTCCCTGATTGCCTCCCCAGCTCCACCCATTTCTCATACCTTCCTTTAATTGTATTCCATCTAGGACCCTTTCCAACTCCTTTACCCACTATTCCTCCCAACTAAAAAATTCTCTCATCCACCTAAACCTCCATTCCCAAACATCTTTATTACACACCCCAACCCCACATAGAAGAGTCTCTTTCTGAATTGCTTGAATTCCCAACTCTATCCATCTCTCACACCTTCCCTTAATTGTATTCCATCTAGGACCCTTTCCAACTCCTTTACCAAATCTTCCTCCCAACTAAATAATTCTCTCCTCCACTTAAACCACCATTCCGAAACATCTTGATTCCACACCCCAACCTCACATAGAAAAGCTTCTTTATAATTAGATAACATAAATAATCTTGGGAACAATGATTTTAACTCATGCATCTCGCCCCACCTTCTTCCCAAAATTTGAATAGTGACTCATCCCTTACAAAAGGTTTGACATTGCCCATAAACCAATCACTCACTCCCTCTTCAGAAGTTACCTTTAGAATACCCTTTCACCACTGAGACCACCTACTCCTTTGCCTCAATACCATATTACTTCTTATATCTTCCCTATATTTTGCTTGTAATACCTTGACCAAGAGAGACTCCTCCCCCTGAAGAATCCCCCATCGGCACTTCCCAAGGAGAACTTTTTTAAAAACCACCACATCTTTGATACCCAGACCACCTTGGCTTTTTTCTCCACACACCAACTCTCATTTGATCCATGCAACCTTGTTATACTTATCTGATCCTCCCTACAAAAAACGTAATTGCATGCTCTGAATGGAGAGAGCCATCTTCTTTGGGATCTTGTAAAAAGACAGAAAATATAGGGGAATGGATGAGAAAGTGGATTTAATTAAGCAAATCCGCTCTTCCAAAGCAAATTTTTTTACTTCTAAGATGATAACTTGCTTTGATTCTATCAAGGACCGGTTCCCAAACTCTCTCACTCCCCACATTATACCTCACTAGAATCCCCAAGTAGGAGAATGACAATTGCATTACCCTACAGTTTAGGATCTGTGCAAAGGATTGCAATATCTCGATATTCACCCCTATTCCCCCCAACCTGCTATTGTGGAAATTTATTCTCAAGCCTGAGGCCATTTCATAAAACCTAAGAGCACTATTAAGTGAATACACATTTTGTACTTCTGAAGTCACCATAAAAATAGTATTGTTGACATACTATTGAAAACAACTTGTAGGTCACTTATACCCATCTTAATACCAGACAATAGATTTACATGAAGTGCATTCTTAATTAGGCCCTAAGACCTTCAACTACAATTAGGAATAAGAATAGAGCCATAGGGTTCTCTTGTCATAAACCTCTTTGCATATGAAATTTCTATGAAGCACTTCCGTTTACCAGAATTGAAACAGACGATGATTGGAGACATCCTTGAATCAAACTCACCCATATATCTGCAACCCAAAGCGCTTAAACATGTAAAACAAAAACAACCAATTAATTGTGTTATAGGCCTTTTCAAAATCTACTTTAAAAACTAGTAATGGCTTCTGATGGTGTTTTGTTTCCTGGACTGATTCATTTACTAAAACCACACTATCTAATAGTTGTCTCCCTTTGATGAATGCTGTTTGGGTGTCTTCGTTGATGCAAGCCATTACACTTTGGAGCCTATGAGCCAACACTTTTGCAATGATATTGTAAATAACACAAATCGAGGACATGGGCCTATAGTCTCCAAGGTTGTCTGGCTGATCCTGCTTAGGAATTAAGGTTAAAAAAGATGTATTTGAGCCCCTAGGGAATTTCCTATGCTTGTGAAAATCTGACAAAACCTTCCATATGTCACTCTTTAACACTTTCCAGAAGTGCTTAACAAACTTCATATTATATCCATCTAACCTAAGGGCTTTTGAGTTGTCACAATCCCAGACAATAGCTATAGTTTCTTCCTCAAAGAATTCTTTCTCTAGATTGTCTCTTTGGATATCAGAAAGACTCTTTATTTCCACACCATCTAATCTGACCCCTTCATCCGTCTGTGATTGAAATCTAGCAATGAGGTTAAGATATCAATAAATTTTAACTAATTTTCTTAGCCATTAGTTGGTTGAAATGACAAGTCACACACACTCGTGATTGAAAAATTTTAAATGTTGTTTGGGGCTTGGAAATATTATGGAAGTGTTCTAAAGCAAGTTAATTAATAAATGTGCTACCTTTTTTAGTAGGTGTTATGCACATGAGTAAACTTACATAATTTGAAGGTGAAAAAATTCATCCCTTCATTTTAATAAAGTCACATGCATGTGTTAAAATTTTATATATTTGAACCCCCTCATATTTCAATGGAAAGATAAATAATTATACCTCTTATTTTAATATTTATACTTCTTATTTATGTGTTTGAATCCATTATTTGTTTATTAATTTTTTATATATTTATTAATACTTTATTTATATTTGATTTGAAAGTCTATTTTATCTTTTCTTCAATACACATATATACACACATACACACACACACACACACACACATATATATATATATATATATATAGTTATTATTAGAGTTTTTTAAAATAAATTGCCCCTAATCTTGGGTCTTAGATCCACCTTTGGCCATGCATGACTTATCATGGAAGTGGAAATATAAAATCTTTGCAATTTGAGTATTGTATGTTTTCACTAAGTGAGCACCAGACATGCTCACTAATTGACACATGAGGTTCTAGGTTGATACATAGTCCACACAAATAATGTATTTGATTTGTTATTTCACCTCTCTTTGGTAAGTATAAAACTAAAAGTTTTTTTTATAGTTACTAGCTTTTTCTAAAAACCTACTCCAAGTAGTTTTTTTATCTCAAAAGATCTCATTTTTTAACTACTAACTAATTTTCCTGCACAATTTTACCCTTTATTAATTAATATATTATCATATACTAATTCTCTCTCCTTACATGACACAATCTGTCTCATTCATTAATGTAATTATAGTAATTCATAATTTAAATATATAATTATAAAAGTAATAATTTAAATATGTAATTTAATATATATAATTATAGAAAAGTATAATTTAAATATATAAGTAATTTATAACTTAAATATGTAATCATTTTATATATGAAAATATGTTATAATTATTTTAAATACTTTATTATTGATCTAATGATAATGATGTCCTTATTTATCATTTTAGAACTTTCAGGCAGTTGATCAGCTAATTTTACCAAGTACTTACAACTATTTTTTTAGCTTTCAACTAATTTTTCATAAAATCTTTTAACTTTTAGCTAACTTTTTAACTAGTTTTGCTAAACACAGTCTTCAATTAGTTAAAAACTAGAAAACTAGTTGAAACCGTTTCAATTTCGTTTGGTAAGTACACTAGGGGTTTTTTCTAAAACTACTCCAAGTCATTTTTTCAAAATATCTCCAATTTTTAACTATTAACTTCATTAATTAATATATTATCTTCCACTAATTCTCTCTCCTCACATAAGAGAACATCTCTCTCATTCATTTATCTCTCCTTTGTTAATGTAACTATCGTAATTTATAATTTAAACATATAATAATTGAAAATCATAATTTAAATATATAATTGAAAATTTATATATTCAATTATAGAAAATTATAAATTTAAATATATTATTATAGTAATTTATAATTTAAATATGTAGTCAATTTATATTATTAAAATATTTTATAATTATTTTAAACACCTCATTGTTAATCTAATAATTAATGATGTTTTTATTTGTTATTTTACAACTTTTAACTAGTTGATCAGCTGGTTTACCAAATAATGACAATTAACTTTGCAACTTTCAAACTAACTTTAATTAGTTTTGTCAAACACTTCCAAAGTGGAAATATATATAAGTGGATTTTTTTTTTTGAAAATACACATTTATTTAAATTAGAATGATATAACACATTTATCAATATCCATTTTTGTTTAAATATGTGTATTTATATACTCACATATTTTTTTAAAATTATAATAATATAAAATATATAATTTAGCAATACTTAGATTATTTTACTAGTTTACTAAAAAAATGTCATTTTACTTTGTGAAATATTTATGTGTTTTTAATTCAACGTTATTTTCATATATATGACGAAGTGACATGTCAAATAACTATATTATTTCATATTTTAAAATTAAAAATATAAAATTATCAAATAAAATAATATAAGTATTTTAATGCACAATTAATACATAGCCTAACAAAAATAAATAAATCTAATAATATTACTTATAAATAAAACATAAAGATGTATTTTTAAATTAAGATATCAATATTTTTAAAAATGACTATCCTACAAAATCTAAATATTTACTTATATAATAGTACAATTTCATGAAAACAATTATTCAATGAATTTACATTTTTTATACAATTTAAAAGTATTAATATTTCTTTCCGTACAGTATGGTATATTATAATTTTTAATTTAATATTTTTATAATATATTTATTTTATGTATTTATCTAAAGGAAGGTCACTTAATTATCCGTCCACAGGAATTTGAATGTTTGTTTGAACACGCATGAACTAGAAGCTAAGTGTCAAAAGTTAAAATTAAGTCAAACAAGTAAAAATGACGCGTTTATTAAGCTGTTATTCCTATCGAAGATTCGTAGCCACTATCGTAAGGCGCGTGAACGCAAAGAGAACCAAACACGCCATAAAAAGAGACCGAGATTTCAGCATATGATAAGTAGCACCACGAACGTGACATTTGACGATATTCCCAAATATTAAAACGTAAAAGTGATTACATTTAATTTGTTTTTACCCTTTGATTCACACAATGGCAAAGTAACAAAATAACCCATTAACCCCGTCTCTTTGCCCATTGATGAAGTAAATTTATTTTATAAATTGTTTGCTTAAGTAATAAGAAAAAGAATTATTACTAGTTAATTTGAGGGCTTTTATTTTATTTTTTACTACGTTGAGCTCATTTTTTATGACATTTCAGAGGAAATAATGTAACAATCATTATTATGCGACAACATTCATTTTAAATGAATTTGGTTTTGAAAAGTTGATTATAATAAAAGTTATTTTTGAGATGGATGTGATTTTTTGAGATGGATTGATTAATGTTTGAATATTTTTATTATAAAAATAATTTATGAGTAAAATATTTTAGTATAAAATTATTTATTTAACACAAAATTTATTTCAAATTACTTCAATTCAATTCACAATTAATTCTGAATTTTTCATTAAACCTTTCAATTTAGGATTTTTTTATTTTTATTTCCTAAACATTTTAGGAATTATGTTTTGGTATTAAACTTTTCATTGGCTCATTAAACGTTATCATGATATACACATAACCGATGTGTAATACCAATGTTATCTACATAGTGATGTGATATTTATATGATTTAGTCATAGCGTTTATTTAAATAATAAAATGAATTACTTTTACACATTTTTAACATTGTTTTTAATTTTGTAAAAAAATAATTTTTATTTTCATATGACATGCACTTTATATTTCTCTATCTATCTATATATATATATACATATATTATATTTGCATATGCACATATATCACAAGTGTTATAAGTGGAACAGTAGCAAGTGAGTTAAATACTAAAGTTTTAAGCTTAAATAGAATTTCTTACCATTGAACACATGGATCAATACACACAACTCGAGTTCGTGATCTGGGTATACAATTATGTTATATTGTATACTTTGAAAGAGAGTTTTTACTTATAGTGATCCTAAAAGACTGGCTCGAGCATGATTGTTTTTAGAAAAAAAAAATAGAATTTCTCTAATTAATTAAAATATTATATCTTAATTATGTGCACATATATTTTTGTTTCATGCGTTCTTTTCACTAGAGCTATGCAGGTACATGATCTTTTTTAGCCATTAGACACGTCTTTGTTTTTTTCATAGCTAACCAACTTGATCAAAATTTTGTTTTTTTGCCTTTCATGAATTGTCAATGAAACAAGGACTTGCTTTTCTCTTTTTATACTTTACACTATTTCAAGGTAACTTGCTTCTTGCCAACAATCTGCTATTGGGTCACTAATTAGAAAAGGATCTTAGTAGCACATATATAGAAATAGGTGCTTTTGTAATTTTCCCCTAGGCCATCTTCCAAAGCTGAGAGTGACATATATGCATATAATTCAATGAATTCACACTCACACTTTACATTGAACTTGAATATCATTGGCTAAGTTTGTCTTCCAATTATACATTATTCAAAGCAACTTTAATTTGTTCTGTTTGATTTAGTGCGTTAACCAACCTATCAGAAATTCGTATACATTAACATGAACAAATCATTATATATAGTGTGTCCAAATAATCTTTTGATCTATGAAAAACAAAATCTTTTTAGTTTCGGGTCATTTAAATTAATATAATTTATTTTGATTTTTTAAATATTTTCCTTTTATCTTATTTTAGTATCCATCATTTATGCAAAATAAATTTGTTGATTTTATTGCTCAATACTTTAAAAGTTATAAATAATAAATTGTAATTAAATATTATGAAAAGCTTTTTTGCATTATTAGTACATAATTTTTTACGATGTCATAAATTATTTTAAATAGATGACAAATTAAAAACACAAATATTTTAAAAGAGTCCTAATAATATGCATATAATAAGTCGAGTTATTAAAGTTTCTAAAATAATAATGTATTTACGATTATGAACTAAAACAAAAATAAATTTTTTTAACAATTAAAACTAAAATAAAAAGAAAGCTAAATTATTATTAGTGTTCTTCTATTTTATCACTTTCGTACTTTTTGTCTCCCATTTTTTTTATTCACTTATTACTCCTAAACTTTATAAAAAGTATAACTTTTATCCTTCGTCACATTAAAACTGTTAAAAAAGACATTTTCGTGACATTATAAAGTATAATTAATATAATATTAATTTTAAAATATTCAAAAAAATGGTCATGAATATGCACGCACATACCAGGAATTGAACTCTGTGTTATGCAATTCCAAAACAAGTAATCATACCATCAGACCAAGTGTCCACCTTAGTTTTAACTTATCTTTCAACTTTTTTTGTTTCCATTCTTTAGTATATTTTTGTTGTAAATTAAAAAGTGAATGGAGAGACATGATGGTGTGTGGGATGACATGCTTGTTTTGAAATTGCATAGTACTAAGTTCGATTCCTGGTTTGTGCATGTATATTTTTATTTGTAATTTTGATGTTTTTGAAATTAATCTTAATGATAGTTTAACTATATTTAAATTTCAAAGTATAACCAGCAAAAACATTTAGTGTAGTGATTGGTTATTTAGTGTAAGTACACATTTGTTAAACTCATTATATTATTTATATTTATTAAATTTTATTATTTTCTCTCGTGATATCTTTAGTATGGGGTATACATCAAGCATTTTTTTTCTCAAAGTACAATATCATTTTAATCAATGTAAAAGTGTTGGAGAATGCTTGAACTCTAATAATAATGAAGAATATTAATATGGCATTAGAAATCGAAACCTACGTTATCTTTTCTCTGAAAACGCCAAGTAAACAAACCAGTGCTCGTCACATTGCGCACACCGATGCTATTACATTACAAGCAGTTGATCTTTCGCTGTAAGGGAGAAAAACAAGTATGAATGCGATAACTCGATATATAGATTCGGGTCCCAGATCTTCCTGGCTTTGGAATATATTTTTAACAATTATAATTGTATGACATCAATCTATGGAATCTGCACATTTCATAAACTAGGTCGGTGGATTCACAAATTTTGATTTTTAACTTTTTTTTTAAGGGATAAATTTAACATTTACCTTATTAGTTTCTATTAATATAGTGATTTTTTTCTTTTTAAATTGTTATCTTTTACATTTATAGTATTGAAAATATTCGGTACTTTAAATTATTATAAATAATATAATTTTTATTATAATATATTATAGCTTAATTAATTTAAAAAATCTTAATTTTTTTTAATTGTTTTATGTATGTGTGTGGGCCAGTACACCTTTCAATCAAGTTTGCAAGTTAGGTAGGCTAAATATGAACTAAAAAAATAGTTTTATCAAACTAAACTTATTCCGTTCATTTAAATTTGCAATAATATCTATTTCTAACAAAAAAAAATATATATATACAGAAAAAAATCTAAAAAACTTGTAGAATTTTAAAATCAATTTATAAAATAATTTACATAATTTAGAAAAAGTATGTAGAAAAATTATTTTAACTTATTTTTGTTGAAAGTATTTTTTGAAGAAAAATAGTCTTGTCTAAACCGTCTACAAAGTCCGTGAACTTCGTGTACAGTATATAAAAAAGATAATTCATTTTTCAACTGATTAAACTCATTTAAAATATGAATTTAGACAGATTGATTATCGATTTATCCATATAATAGTAACTGTTTTTGAAAGAAAAAATCTACAAAACTTGTACATTTTTAAAATTAATTTATAAAAAATTTACATCATTTAAAAAAGTTTATAGAAAAATTATTTTAACTTTTTTTTTGTTAAAAGTATTTCTGAAAAAAATCAGTCATGTCCTGATGCAACTAACGCAAGGCGGTTTTCTTAACCATACGAAACCTTTGTGCATAGCTGCATGTGTTGTTCATTATTACTGGTCTTCGAATTGCATGCTGGCACGTTTACTAGGATGAAATTAATGCAGGACTAATTCAAAGTTGGTAGAATTTTCAGTCATTATTTTCTGCTTTATTTATCTATGAGTGAAGATTATTTTAATTTTTAAAAGGTACAAAAGCAAAAGCTAACATTTATATATAAATCAGTCTTTATTGATTTTTTTGTTCAAATTAATATATAACATTTTAAAATACTTTTAAAAATGAATTAGATAACATAGACTTTATAGACCAACTTGTACAACGTCAGAGGAGATCTACCATCTAACTATTGCCTTTGCCTATGACCTTCAAAGTCTAAAAATGATACTTCATTCATTTATTTATTGTTTCCTTTACATGTTATTTGACTTGATTTTGAGACAAGACTTAAAAATACAATTAATATTCAGATTTTAAAAGAATTATCATGTCATTGTCTCATTTATCTTTTATATTAATTATAATTTTTATATTCACTGTTTTAACCATGATATTGATACAGATCTAGAATCTTTGAGTACACTATCACTGTATCAGAGATCTAGAATCTTTGAGTACACACAAAAGTGAATTTTTTTTTCTTTTTTATAGATAATATCTTTTATTATTTTCTCTCTTCGATCGATTCATAATAAATAGAGAAGGATATAATATAAAAAATATATTTAGTTTTTTAATATTTTATTATTATATTGACTTCTTAACCAATATTATGATTGAACAACAATATTATTATATGTTTTAATTACATAAAAAAATAAAAGAATTATACATATACTAACTATATTTAAATCTAATTTTAAAATAATTACATCCTTCTATTTCTTATTTAACTTCCATTTTCGATATTTTCTTCTTTTATTTTACTTTTAAATTTTTAAAAAATATTGAGAGGTACAAAATGCCTCTTCTTTTCTTAGCTTAATTTGCTATAGTTTTATTTCAGCTATATTTTTGCAAATTCAAACATTTGAGAATAAATATATATTAATCATTGAGAAAATAAGTTATACGTTATAAAGAGTTTTACTCTCTTGTTAAACCACATGATAATGGTTACATAAACCTATATTTGGTTTGTGAGCTTATTTAATTCCTTTGTTTAGTGATAAGCCCATTACTAATCTTTAATTTGGTGATTAATCCCATAGTCTATATATAAACCTGTATTAGAATGCATAAAGAGAATTCCAGCATTCTATAAAAAAAAGATGAAAATTCCAGCAACCTATTTAAAATCATAATTATATGAGTAATACAGGTGTAACCGGAGTAACAAGTCACTAGTCAGGACAAATTTATATAAAGGCTAAGCTACACCTAAAAGATATTTGTAATAGACTAATTAGTCAAATTTTGGTCATAAGATTATAAAGCGGGTTAGAGAAAACTTAGAAAAAAACCTCAGAAAAGATGAATACTTACTTTCTTTTCATTCTTATTTTTAAAATCTAATGGTTAAATTAGTTGTTTATTATTACAATCATTAAATTAAAAAAAATTAATAATAAAAATAAAAAGTGAACTTTTTATATTTACGTTATTTAAAGAGAATTTCTCTTTATTATATATATGAATGGGCTAACTAATTTTAATTAAGCAGTAGTATTTACAAAATATAAACATGAGAAAATGTGATATTCTTGATATAAAAGTCATATTATGAAGAGAGTAATGTTGATAGAAGTCCTAGTTCAGCAGACTGCACACATCATTGTAATAATTGATTCTCTCATTTCTATATTTGGGTAGTTCACTTCTGAATTTAAAAGTATTAAATTTTAATTTATTATATAATAAAATAATTTCTTTTTGATAATGATCGAAGATATCTCTCCTATATTATATCTCTCCTTTTTTTTAATAACAGAGGCCAAACCCCACTATTATATATAATTTTTTCTTCGATGATTGTTTGACAACGATAATATTTTATTTTCTTTTTGATTTCTATATTTTTTTAATTTATCTATATTGAAATGTATATGTGCGCAATGTTTAAATGTAAACTAACTAACCTAGCTGTGCTAAAATTTATATATTCTTTGTTTCTTCTCTTGCTTTATTGATCCCTGTAATTTCAACTTTTACACCTTTAGTCCTCGTACTTTGATCAATTTTGTCTTTTTTTTTTGGTTTATCACATCATCTTAATCGTGTAATTAAGATGATCTTTAAGAATAATATTTTATTTTTACTTAATATTGGTTATTAAGTTAGTTAATTTTTTCAGTAACAAAAAAACTAATATATTAACTACTAACATTTATCTTATTAAAAAAATAGATAATCTACAAAACTAAAATTGTTAAGTTTTTTTTTTTTATAAGCAATTGTAGAGGCAGAAAAGCAATTAAGTATATATATATATATATATATACACTTTTATGTCTAAAATTTCTTTGGGTTATATAACCATAATAAAACCAATCGTACATACTATATAGAATATATTAAGAACAATCGTCAACCTTTATTTCTGATGATTTAGTTTAGTGTTCATGAACTAGTTAATATACCTTTATGAATTACCTTACATACCTAGCAAATATTAAGTAAAGTATGTAATACTTGAATTGGTATGAAGAAAATATAATAATAAAACAAAAGGAAATTAACACTAGCATGCAAGATGTAACATTTTGAAACAAAGTTCAATGAACTACGAATGGCGTATTTAATAAGGTGCATATACATACTTAGTCAATTAGTTAGGTAGTCGATGAGTAATGGTTGAGGACCATTTTTGTTGAGTAATAAGTTACAAATTTGTACCTTGCATCATATTTAAACATTATGGGTGTTATTTTTATCTATTTTTGTCAATTCTCTTTATCTTCGTGCTTTTTTTCTTTCATTCTTTCAATATCTTTAGCATTGACTTTAGAAGATATAAGAGATATCTATGAGACCCTTAAAGCTAAAATGTGTCTGTTTCACAATTAATGATATCTATGATATAGTAAAAATGGTTGCATTGCAATGCGTATGTATATAGTCGAGAGTTAAAAGAATCAGACTCGTGAATCTTCCAATTAGAAATATAGAATGATAATAATGAAAAAAATAAATAAAATACTAGCTGGTGGCAGAGAAAAATGGTTCCTGTCTCTCTTCAGAATCCAACAAGTTTAATAAGGGAAGAAAAATTGAACACTTGTTAAGTTTGAAACAACATTGTTATTTGTTACACGAAAAAACCTTCAACCAATAAAAAAAACAACATTAACCAATCAAGGTAAGGATTTAAATCAATGAATTGAAAAAAAAAAAAGAAGAAGACTGACCACGTGAGTTTAACCCTACAAAATGAAAATGGTTGATTATGCAATGTGATAACAAATAAAATGGTGATCATTATTTGAGTTTAACCCTACACTACTTGTGAAACTCACAACATATATGGTACGTGAGTTTTGAAATTTTGAACCCATTTAAATATGTAAATATTTTAGGTTGATGTGAAAAACTCGTGGGTTTAGTTGGTTAAACTATAACCCTCTGTGAACATGTATAGTTAACTTTTTAATTAAAAACTATTTCTTATAAAAAATGAGGTGTCATAAGTAACAAAATGATAAAAAACTCAATATTTTATAAAACATTTAAGATTTGAGATTTTATATTTTAAAACGCATTTATATTTTGTTTGTGTGTATTTCAAATTTGTACTATTTTATTTTATATTTGAGAATTGAAATTATGTTTGAAATAATATTTAAAATTTAATTATTAAATAATAAATATTTTTATTTTACTTAATTATTTTTTTGTAACCTATACTTATTATATATTGAAACTTTTATAATAGTTTCAATTGAGATAAATTTGTTTTAAAAGAAAAGTTTTTATATTTTAATGTGGGTTAGCCTGTGGGCCTTCACAAGGTCTATGGAGCAGATATTGACTCAAATATAATGAGTGTGTTACCCGTATGCTCATTCTTATAAGAAAGAGATGATGAGAAATGAGAATTATTAATGAAGTATTTGTAAGTTGTGCATATGTAAATACCAATACTCATAAAAATTAACCATTGTTATCATTTAGAAGTTTAGAGCAAATTTGATATCTACACAAGGTTACCAAAATTCTTTCACACCATTTTTTTAAAATGTTTTTTTATTATTGGTTTAAATTTATTGAGAATCATCACTTTTAAGAGAATTAATAATTAATAAGAAGTGAAAATCACCAACTTTGATAATTTTAAAAAATTCTACCGAATCATATATAGAATTTTCAAAAGAGTGTGTTATGTATATAAAATTTAGTTGCTAGAAGTTCTTTTACTATAAATACTATTTTTTCAAGCAACTTAATACAATTATAAATAATTGTATTAATATTAATAATAGATATATTTTCAAGCAACTTAATATAATTATAAATAATTGTATTAATATTAATAACAGACATAAAACACAAGAGATGTCTTTTCCTTCAAACGTACAACAAGAATAACAAAAACACCAATTATAAGAATGCCAAAGTCTTTATAAAAAAGCAAAGAATGAAAACAGAAAAATAACCCATTAGGAGGACATATTTGTCACACAAAAGATGGTTTATAATAATACATACAATTATCTATGTCTCTTTCTAGTTCAATCTGAATCTGATTAATTAAGCACGCGCGCAATGTTTTGTTTGTATTGTCAACGCTAAGAATCGATTATTAGCTTGATTTTTCAACCACACAAAAGCATTGTGCCGTGCCATTCAGGTCACAACAATGCATTTGTTCACTATAACTGAAGAAACATTCAAATACTTACTTAGTAATAACGTTAACCAACCAATGAATCTATGGTTTTTCCTGTGTTTTCTGTCTCTTTTTTTTTTTTTTTTACTTTTCTAATGTCATGTGACTACATCGTTTAAATTTCTCCTATTCACTCACGAGTCACGAGTTCCATGAACATGCACTAGATCTACAATTTGATTAATGACTATTACATTGAGTATTCTAATAATTGTTAATTTAGTAATTTTAAAATTAACTGTGGTACTAGTATCAAGTCGTGTTAACGAATATATTAATTAAATTGTTTATTAAGAAAAATAATTTAATACTATTTTTAATGAAAATCAATTTCAACCTGTATTAATTATTAATATATTTCATTTGGTTTTTTCTATAAGGCCTAATTAACTGGTTGTCATGATTAAAAAATAAATTTATTTTAAACTTATCTGTTTTTTAAAATTATCTTTTTTTTTAAGTCAAAATTTTTTATTAAAAAATGAATGAAGTACAAGATTTACCAACCAAATTACACAACTTTAATATAGAACAGACTAACCCATACAACATATATAAGATTTATAAAATTATCCTTAACATTCATTAATGGTATATACAATTATTTTTTAAAATATTTATTATTTTAATTCTTTTAATCTTTTATCATTAATATATTTAGTTAGCAAGACTCAAATTTAGGATTGAAACAATTAGGTCAGCCCACTTGTGGAGGAGGTAGGAATAGAGACGGTTGAAATTTTTAAGTTTCAACTTTATTGTTGTCAATAGTTTTAATATAATAAAAATTTTCTAGTCTCCAAAATCACTCTTCCTTTTATCACTATCAAAGCTTAATTGCCACGTGTTCATTATCTACTCCTTCACCTTCAATCTTTCTATTTTATAATTAAATATTAATAAGTTCTTTTCTATATACAAATTATTTTAAAAATTAGTGCAATACATGATATTAATTCTAATAAAATAAATTATTATAAATATCAATCAATCTTTCAATATCCATTTTAGATTTATTTTATTTAAATATTTTAAATTTTGTGTATTGTAATTATAATGGGTACTTCTGTTTTATATTATTATCATGGTAATAAATATTTTTTTTTATCTCCAAAGAAAAAGTTTTATTACTTTAATTTTTATCTATAACTCTTATTTATACCATAGTTATTTTTATCAATTAACTTTTAAATTGTATTTTTTACCACACTTTACTAGTATTAAAAAACAAGATTTTTAAAATGCTTTATATAAGATAAAGTATATATATAACATTAAAATAATATTATATATTGAATTAAGAAGTATGACTTATAATTATAGACATCTTTATGAAAATAACCAATGCATAAAATATTATAAATTGATTTCTATAAAAAATCTCACCTAATTTATAAAGATATCTCTAAAAGTTTAAAATACCCACTTTAAATATTTTAAAAAATATTCAATAATTTTTGTGATCTCATATAAACTTTAATTTTAACTTTAAGAGATTCATTTTTCATATTTTTATTTTTAATTAACTTGAAAAATAATTAATTCTAAGAAACTTTATATTGCATAAGACGACATTTATGTTTTTTTAGAAAAAAGTTTATCTTATCACATATATCGATCTGGATAATTTTTAAAAAAGAAAATATTTGTTTTAAATACAATGGAAATTCTGATGATGGTCCCTATATATAAAAAAATTGAAAAACAATTACAGATTATTATACTTTATAATAAAAACCTTATTATCAATAGTTCTAGTAGATCCAGTCCAGACCAATCAACATTGACAGTGGTATATATACGGTTGTGTACATACATGAAGATAATTAATTGGTATTAGGTTTGTGGGTCCAATCTCCAAAGGCTAGTAGCTACGTGTATATGCCTATTTATGATGATACATAGTTATGTTACTTAACGCTTTTAAAACATTGTTCTTGATAAGTTATCTTTCGCGGGCCACATTAACAACCTCAGACTGGTTTCTCTCCATCCAATGTTAATTCCTGTTTTTCCAGAATCATTAGCACCACACAGTTCATTTTTTACCTGAAAAAGCTGCAGCTACAAATCTAATGGCTTCTATAATCAGTGTTTTCTTTTCATACTTTATTAGGAGAGCATATGTAGATATTTTTTCATCTTCAACTAATAAAAGAATAATATCTATGTATTTAAATGTAATTTTGTTTCAATTTGCAAGTTGGATGCTATGAAAGATATTTGGTCTTTTTGTTTTTTAAATAATTTATAATTTTGAATTTTTATTTAAGAACAGAGACACTTGAGTACTTCAGTTTGTTTGAGGTAGTTGTTAGATTTTCTTTTAGGATTTGAAATGTATTTTAAAAAAAACTAAATGTAGCTAAAAATCTTTAAGTTATTTTTAAAATAGTTTTTACCTTGTTTGAAAAGTAATAAAAATTGATTTTAAGATTTTTATTTTTATTGACCACCCGTTGTTTAACTTTCTATCTTTTTAATTATATATTATCACCAGTCTTTTATTATTATCACTAACTGCATCTTTGATAGCAATTTCTCATTAATTGTCACGGTCACGATTAACCGCTGAATTTTGGTATTATATTTGGTCTCTAGCTACCACCGCTAATAATTATCATTAGAGCTCTAAAACTGATTTTCGACCTAGCTTGTTAAACCAAGTGTAAAGAAAAAATTATTTATTATTAACTTTTATAAATTATCTTATATGTTGAGAAAAATGTCAATATATCAACAAAAAGTCTAATATATAACTATCTAATTTAAAAGACTTTTAAATTCTTAAAAATTTGCTTTAAGTCCCTTCTTACGATCGAATCGACCCTAATTGACTATTAAATGCATTAAACAAATAATATTTTTGTACCACACTATTAAATTTAGATCACATCAGATTTATTTCTTGACGATTAACACTTGCCATTTTACGAGAGGTCCAAATCATAGATTTTACAAAACTTCATAAGCTTAAAAAAAAAACAACAATAAAACTTTATAGGGATTAAACACATGTTTTAAAATAAGAGATCGAAATTATCGAATTTGAAAATAAATAAAATAAAACTAAATGACTCTCTTTTAAGATAATAAAAGACCAAAATTGTATTTAAACTTATATATAAACGATAAAAACTTAAAATTACATTATAAATAAGTTACAAAATAATTTTAACGTTATTTTAAATTTATAAAATATAATTATAAAAAACCATTAACGTTTATTTTAATTTTTAAAATTCAACCTTAAACATAAAAAATATATGGTAAAAAATAAATAATATCATAAATACTATATTATCCATAAAGTGAATATTGTCGAATTTTTTTAAATTTAAAAGAGTGTTTCTAAAAAAAAATTAAGAAAGAGATACAGTTTTCTTTTTTTTTTTTTTTTAAAAAAACAAAAGCATAATTTTTTTTAAAATAAGTAATTTAGACAAACACATAATATAAAACAGAAACTGTGTATTTAATTAATTAACAAACATATTTTTTACAAAATAATTTAAGCATACTTATTATAAATTCATGTGATTATACTTTATATTAAAAAAAAAGACGCAAATAATTTTTTATTTATGCATACATGGTAAAACTTACCTATTTTTTCCTATTTTATAATGCAGAAACTATTTATCTTGATTAAGATAAAATCCTAGCAGTTGAAAAGACAGAAAGTTAAAATCCTATTCAAGTGTCTAATTATTTCGTGGGAACAAAAATATATATTACACAGATTTAAACTTTTTCCAAGATGAACAATAAATTTAAATTTATCATTAGTATGTATGCTAATAATCATTATGCATTATCAATCCCATAATAAGGCAAACATAGTGTAAATGAATTCTAGATGATAAGCTTTAAATAATTTGTGTATAGTTGTAAGTTCAAATCTCACTATCATTATTTAAAAAAAAAATTATACGATGAACCTTTAATGCCCCCATAAATATAATCATATAGATGTGTATCTCCAACATATAATTGGCCTAGAAATACTGCAGATGACATCATAGTTTGGCACGGCATTTACAAGTGGCTCCAACAAGACATAACTCTTTCATTGTGAGTGGCTTACCACCTCTTAAAGTGGTTTTTGAAAGTAACTTTAGAGTTTCCTTAATAACATGACGATAATAGATCCAACAAAAAATCATAATTCATTATATATGGGTAATGTAGTGGTACGAAGAGATTCTAAATCAGAGGCTCAAATTAAAGTAATGAAGAGGGTTTGTAATTTGGAAGAAACATTCTCGTGATATTGAACATTGATATACAATGAGAGAAGACAGGCACACTCGTGCTGTAAAGATGTTACATAATCCGACAATTTAGGAATATGACATATTTTTTCTTTCTCATACTGATACCACTTGTAGCGTGTGATTATCGGTTTAAAGAAATTTTACATCCAAAAAAATCAAATACAAAACTTCTTATTAAATGGATCCTTCTTTTCATATAAAAGAGGAGAGATCTTACATTATTGTGTCAAACCTATTCCGTAAGAAATATGTTAAAACTTCAACAATTCCAAACTTATGGTTGTGGTAGAATTCATTTCAGTTATTCACTTATTTTTTATTATTTCGTAATAGATTCACATTTAAAAAAAAAAAAATTGGTTCTTCAGAAAGAACAATTATGTTTAGAGACGTGTTGTGTTTCAACGATGATTTTTATAAAAAACAGGATCGACCCTGTTAAGAAAAAATGAAGTTATAGTTGTCCTTGTAAAAAATAAAATATTTAGTATTTTTAATATGTTTTTAGATCTCTTTTTTTTTATTTTTTTACTTGAAAAATTATTTATTAGTTTTAATTAACAAAAATATCTTTTGACTATATCAAAAACCAGTTTTTTAGTCATATTTTTTTACCCTAATTAATCCAATAAATTATTATTATTAGTTTACAAACCCTCACTATGCTTACAAAAAATTCTTACCATATGTTAGATAGTAAAGAACCTTCCTTATAATTAATAATCACCTTAATAATCAACACTCAAGATTGTCATATATTATTTATATTCTCACTATGTGTGGCCCATGAAGTTAATAAAAATGGCACCACATCTGTGACTAGTGAAAACACATTTATTTAGGTGAATGAAGTGTACTCAAAAACATGAAAACCGCCACTAGCTGCCACACACATACAAATTCTTATTCAGTGGCAAACAAAGAAAATGCATGGCATCTTCTGAAGACTGGAAAATTTGTGACATATGAATATATGATATATGTTTAGCAGCCTTGGTTTATTTATCCGTACATTCTTCCCGTGCCCCTTTATCTCTCTGGTGATTATTCTCCATTGAATAGGAATAACCATGAAAGTTCAGTCAGATTCATCAGTTTTCCATTTAATTAATTAAATGGGTAATTTCTATTCAATATTGAGGCTTACCATGAAGATCTTGGCTAGATGGTGATTCGTGTAATCATCACAAACATAAAAAAGAGAATAAAAGGAAAGGATAGGGTTACCCTTGCTGTTCTGGACATTCTGATATATATATATATATATATATATATATATATATATATATATATATATATATATATATTCTTTTTACTTTTTATTATTAATGTTTCTCTATTTTTCTTTTATATATATAACCTCCTTCGAATTTCTAAAGCCATTAGTTACACAAAATTCTTAAATCATACATTTCGTATCGGACGAAAAAGGTACAATGAAAATTAATTTGACCTTTCTCTTCCTGTATTTAACTAATTGTTATTTAATCAATGGCACAAATTCAAGGGCAAGGGTTTTTAGGGGTGGGGTTTAGAGGTGCAAATCCTAATGTAGTGAATTGTTTGCTGAATGTGTATGCACCATGCGACTTAGATGCTAAAAGGAAGGTATGGGCGAATTTGATGATAACCAGGAGAGGATTTTCAGAAGTTAATTGGGTACTGGGTGGAGATTTTAATGTGCTCTTGGGAAGGTATGAGGTTAAAGGAAGATCAAACTACCACTCGAGAGTAGAGATGGAGGAATTTAATTTCTTTTTACAATAGATGGGGTTGGTGGACATTCCACTCATTGGGAAAAGAGTTACATGGATTTCGCCAGACGGAGAATCATCTAATAGATTAGACAAATTTTTGTTTTCTCCGGCCTTAATGGAGGAGTGAGGGGTTTCTGCACAAAAGGTAGGGACAAGAGAGTTTTTTTATCACTGCTGGACATGTACATGAGATAATAAGCAGGAGCGGGGGCCAATTCCGTTTAAGTTTTTTATCACTGGCTACAGTACCCGACTTTTGGGAAGGTGGTGAAGGAATTTTGGAGTTCTTTCCAGAGCTCAGGATGGAAGATGAACCAGCTGGCTTGAAAGCTAAAAGGACTTAAGGTGGAGATAAAAAAAGTGGAAGGAAGAGGCATGGAGGAAGAATGAAAATTTTCTGGATGAAAGAGTAGGGGAATTGGAAATGGTTGATCAATAGTTACTGGAAGAGGCCCAGATGCTCGTTTGAGGCATGACATATCGTCAGAATATTGGGGCCGAGCAAGGTTAATGGAACACTCTTTATTGCAGAAATCTAGGGTGAGATGGGTGTTGAGTGGGGATAGTAATACTAGATATTTCCATAACTGTTTCAAGGCAAGATGTTACGCGAATTCCATTCTGGCAGTCCAATTGGAAGAGGGCTTGGTGGAAAGTGTGCCAGATATCAGAGCAATAATTTTTAAACATTTTTTGGATTTCTACAAAGAAGGAGGAATGGATAAACCAGTGATGGATGGAATACAATTCAAGCAGTTGTCAGAACAGCAAAAATCCTTTCTAGAAGAGCCTTTTGAAGAGGAGGAGATTAAGGCAATAGTGTGGGCATGTGGAGGGGGTAGGAGCCCGAGCCCAGATGGTTTTGGTATGAATTTTTATAAATCTTGCTGGGAAGTGATAGGGGAAGATGTGGTGCAAGAATTTCATGTGTTGGGAAAATTACCGAGATGGGTAAGCTCTTCTTTTATTACTCTCATTCCAAAGGTGGCTCGACCTTTGAATCTTGCTTAGTTTAGGCCTATCTCATTGATATCTAGTATGCATAAGATTTTATCTAAGTTGTTGTCTTTGAGGCTCAAGAAAGTGTTGGGGGATTCATATCTATTAGCCAGACAACCTTTTTGCCAGGGAGGTCATTCCTAGATGGGGTGGTGGTGGCCAATGAAATTGTGGATTGGGCTAAGAGACGAAAAAGATCGTGCTTTATGTTTAAAGTGGATTTTTAGAAAGCATATGACTCATTTAGCTGGGATTTTCTAGATTATATGCTGAATAGAATGGGCTTTAGAAATAAATGGAGAGTGTGGATAGATAACATTGTCTGGAGTAGCAATGTCTCTATACTAGTGAATGGGTGTCCGACTAATGAATTTAAGTCAGATAAAAGGCTGAAGTAAGGAAATCCACTTTCTTCTTTTCTGTTCTTGGTGGTGGTGGAGGCACTATCCGAATTATTCAGATCAACTATCTGTAGAAGAGTATACTCGGTGTTAAAGGTAGGCCCCACAAGGCGGAATATTCAGTGCTTCAATATGCAGATGATGTCATAATGATGGGAGAGTCAAATTTGCAAACAATGGGATGTTTGAAGGTAATTTTGTGGGGTTTTGAGATGACTTCGGGATTGAAGGTTAATTTCAGCAAGAGCTAATTCTACGGTTTAAATGTAATTGACTCATTTACTAGTGCGGTAAGCAGACTTTTGAATTGTAATGTAACCTCGTCGCCCTTCAAATTCTTGGGGGTAATTGTGGAGTGAATCCTAGGAGAGCAGAAGTGTGGAGGCCGGTCATAGAACAATTTCAAAGGAGACTATCAAGTTGGAAGGCAATAATATGTCTTTTACAGAGAGGTTGGTATTAGTGAATTCTATTTTGTTGAATCTTCCGCTATATTTCTTTTCCTTTTACAAGGCGCCAATAAAGGTGTTGGATGTTCTAACGTGGTTGCAACGCTCGTTCTTATGGGGTGGCAATGATCAAGAACTGAAGATTTCATGGTTAAGTTGGAACAAGGTGTGTCGCCCGAAAGAGGAAGGAGGTTTAGGGGTGAAATGCCTAAGGAAGTTCAACCTTAGTTTACTAGCAAAGTGGAGATGGAGACTTTTAACATATGAGAAGGCTATATAGGGACCCGCGCTGAGATGTAGGTATGGAGAGGTACAGATACTTTCAGGAAGACCCACATATTTTACTCAGGCATCATAGTGGTGGAAGGATCTTTGGGGGATACGGTTCAAAGGCATCAAAACTTGGGTGGTTTGATAATTGTGTCTCGAGGAGGGTAGGGAATGGGGGAAATATTCTATTCTGGGAGCATAGGTGGATGGATGGTAGGGTACTGAGTGTACTGTTCTCTAGGCTGTATGGTATAGCGGAGGATAAGTTTATCTCAATTAAGGACAAAAAGGGCATAGAGGCAGCTCACTCATCATGGAGATGGGTATGGAGAAAGGAACTCTTTGTTTGGGAGGAAGATCTACTTCAGGCTTTAGAGGTGATGCTCGAGAATGTGGTACTTGACGGTAAAATCTTTGATAATTGGGCGTGGAATACTAGCAAAGATGGAGTTTTTTATTGGTGGAGGCATATAAGGTCTTGAGTCAGTTGATATGTTGATGTCGATTAAGTTAATTTTACGGAAATGATTGCTATATTCATTTGGTTTTAATAGGAGGTGCGGGTTCTCGAATTGGTGTGCCAATCCTAGATTGTGTTTGTTGAATCTAATGTAGCCTATGGGGAAGAGGTAGGATTGTTAGTAGGAGGGGTACATTGTGGGGAGGAATGTGGAATGATGAAATGTTTTGTTTCATTTTTATTGCTTAATTAATATATCTTTGCTTTCTTTTCAAAAAAAAAAAAAAAAGAGACAATCCTGATTGAATTTTATAAGACTATGGGAGCAAATTAACTCTCTCCATGAGTATCTAATGTAGCTACATACCTAGATGTCGAACTTGATACCTTTAGTTAAACTTAAACATTTCATATGAGTTGATATATGTTTAGTGGTTTTTGTTTAATCTTCTAAACATACAATTGGAGTGCAAGTGCTACTGTAAAGTCCAAACAATAGTTGGAAACGGAAAAGTTGAACACAACATAAGTGAAAAAACTAAAAAACCTATTGCTTTAAGGTTTTAGGATGAAAATAGTGATATCAAATCTTACTTATATGTGAAGTGTGCTCTAGACCCTTTGGTGAATATCTCCTTATGTCAAATCACTTGAACTTCTAACACTAATATTAGAGCTGATGGTACTAGATTATGTTTGTGGTGATGTGCTTTTACCCTTTGGGTGAATATCTTGTTTTTGTCAAATCACTCTTCTAACACATACTTTATTTTTATTTCTTTTTTTAAAGAAAAATATTTAATTTATTTTTTAAAATGTATCTTACTCTTTATTTTAGTGTCTTTTCATTTAATTTCTTAATTAATAAATAGTACAATATATTTATTAATACGTTAATTGAAAATTTGACATATATTATATATATTAAAAAGAATTATATTAGTAATTAGGATAGTATCAGACTAGAGTTGTAATGGTTGGTTTTGAAAGAAGAAAATGTAAATTAATTTAAAAAATTTGAAACGATTGATAGAATGAAACGGAAAAACAAACTTTCGGAAGGAATTTGTGTTTAGAACAACTCTGGTGGATTCCAGCAAGCAACGTAAGCATGACGTAGCTGAAGTGCATGGTGGAGCAAACAACATGCTCATCCGTAGCATAAGTATGTGAAGTTTATAATCACCACAATAATGAATATAGTTGGTTGAGTAGAAAATTAGTTATAGGGGTTTAATAATTAAAAAATGTTATAAAATTAACAAATAACATTTCAACTTAAAAGTAACTTTTTTTTTTTAAGAAAATGTTAAAGTAAATCGGGCCTGTTGAGTTGGATATTTTGTTTTCTAGATTAGTTATCAATTTTTTAAATTTTTTATTTGTTAAAAAAGTATGAAAATTTTAAAAAATATATTTAGGTACATTTAATTTTCAAAATTTTTTATTTAATGAAGAAAAGCGGTGACGACAGCAAATGAGTGGTGATGTAGACAGTAACAACAGAGGTGGTGAAGTTCGAGATAAGAAACACAAAAAGAGCGTGAGAGGTAGCAATGACGAAAGGGTAGTTGAGGTTGGGGTGGGAGGTGTGAAAGAAACATGAAAGGTGACGTTAACGACAACAAAAAGGTGGTAGAGGTTGGAGTAGGATTGCAAAAAAAAGCATGAGAGATAACGACAAAGAAGTGGCAAAGGGCAGAGTGGAAGTGGTGTAAGGATCAGTTTAATTAATAGATTATTAGTAGAGGAAAATAAATATTACGATAATTAAATGTTTGATTATATTTAAATTAATATAGTAATTGGAGAATAACTGGGTTTATTAATAATATTAATAGTAGGTGATTAATTTTAAGGGAATGGTTGAGATGTATAAAAGAGATAATTATTATTTCCTGATTTCAGGAAGTTTTGGTTATGTTTCGAAGAGTTCACAAAAATATGTTTAGGAACGGTGCGAATAGCAAGTTGAACTTATCAACTTCACTTGCACCCTCTTTCTTTTTTTTTCTTCTTCCTTACTTTTCTTTCCTTTCTTTGTTCCTTACTTCTTTTCTCCTCCACTACCAAGCTTCTGTCTCTATCTCGTTGAAACCTTGAGTTTCATTCGGTTGCATGGTCGACTTAGGATTGGCAGAATCAAACAAAATTTCTTCTATTGCTCCTGATTTTGAGAGATGGTTGTTATAGGGAAGTTTGAACGTGATTATCTTACCTTTTTCCATTCCTTTTCGATCCTTTTGTTCTCGTTAAAAAGAGAATTTTTGTTAAAATTCCTATTTTATCTGGAATTCTTGTTTGATTTCTAAGCGTTTCTTTAGGTACATTCTTCTCCTTATAGTTATAGCTAGCTTGTGAGTGAAGAAATAAATAAGGGGTGTTCGATATTTATTTTGATTTGAGTAAACTTTGATCTAATGTATTTTAATGTTTTGAGTTTGATTATGCTATGTGAATGATTTGTCTGGTTATGAGTTGTGAAGAAATTGTGATTGAAGGATGATTTGGACATTTTGAAGTTATTTGTGATATTGAAATTATGAATGTTATGAAACTGATTATTGAATGGATAACGATTGATGAGGTATGATGTGGATTGTTACTAGTAGGTAACAATGTGTTAATTGTAGTACATTGAATTAAGGATACATAGTGTTTATATGATCATGATATTCAGGTTGAATCAGCGCGAAGATAATACTGGTATCAAGGTCGAATAAGAACAAACGTGTACCTAAAGGGATGTACTCAAATAACAACTGGTTGTCAAATGGGTCAAGAGGACACTAAACAACAATTTAGTTGTCAAATGAGTTTGCCTAGACTTCTACTAATTATCATAATAGGTCAGGTAGATACCAAATATTAGTATGGTGGAAGTCAGATAATGATGCATGCCTCCCTTAATTTTTTTCTAGAGGTTTTGTTCTTTGTTGAAATGGTTTGTGGAGAGGTAAGAAGTGAGGTGGTTTTAGGCATCACTTAAGGTAAGATAAGCCTAAGAGGGAAAGTTTGTCACAAGGGATGGAACCCTTGATAAAAACCTAAGGAATTCTCAAAGAGAGAAGGGTGGACACTAAGAGAATTTTGGCCAACTCAAGGTTTTTCCATTCAATAAAGTGTAAAAAATACAAGAGTGTGAATGAGCACCTTTCTATAGAGAGAGCTAACCTCTTGGACAAATTAAGAAGGAAAGGAAGAGCTAGAATTAAAAGGAGTCATCCAAGGGAAGATGATTGAAGCCCAAAGTCCAATCAATCCCCTCCTTTAGATGAGAATTGGTGCCCAAGCTACCTCATCCAAGGGCTAAGATTACTCCTTTATTAGTTTTGAGTTTTATTTAGGAAAAGAGGGTGTATTTATCAAACTACCCCCCTTATTTCCTAAATAAAGACCCAAAAGCTAATCTTACCCCTTCTTATTACTAAGACACCTCCTAGAAAATTAAATGGACTAATACATGTCCAAAATAAAATCCTAGGTTCCTAAAAGAAAAATTACAAGTAAATAAGTCATGGCTTGCATAACTTGATGGTCATATAGAGGTGATATCTTCCTCCCTCTACTCTAGCCATGTCTTCTTCTATTCTCCTAGCCATGACCCTAGTGATAAGGTCCTTGCTAGGGGAGAATGCATCAGATCAGCCATCGAGCATTCGAATTCAATGAGTCTTTCTAGAAAATGTTAGAGTATATATTGATTTCTCAGGTTCATGGTGAACATGAGTGTGATTTAATTGTTATAAATGTGATTGAGATGGATTGTTAATGAAATTGTATGTTAGATATATGTTTATATTGATTTTTAATCTATGAGCTTACCCTTGCCTTTTCTATTCTTGTTTGTGCATGATTGTGATGATTGTGCTTTGTACGAGAGCATACAATGATGTTAAGGCTAAAGAACAGGATGTAAAGGTGTGACTGATGTTGGGATGTACTTGGAGATGTCCATGAAGTCTTTTTGTGTTTAGTTATGTAATTAAGTGAATTATATTTGAAACATGACATTTTAAGTATGTCGAGGAATACTGTAGTTTATGGTTATCTTAGAATCATGTTTTGTAGTAGAAACTCACATGGATATATTGGAATAAGGCAATCTAAATGTGTTGTATATGATGTATGAATGAATAGATTTCATGTTGCAGGTTTAGTTGAATTTATTCAGCAAAGGTTTTGCTATTTGCAAGGTTTCGCTGGGCGGTAGGTTTTGCCTAGTAAGCTTTAGCCTCTGTTAGGAATATGTCGCAACTTTGCATCTAGCGAGAGGTCTCACCCTATGCAAATTACACAATGTTTAGAGTTAAACAGGTCTTTTGCCTAATGATGGGTCTTGCTAAGCAAAGTCTTTAGTACTAGGACAATCTAATACATGGTTCTCGCAGGACGACGTTGTCGCTAGACAAGGTACCCTGAGTCTCAAGAGGTGACAAGCTTTGTTGACCGAGTTGATGTTGAATGTACTAAGTTATAATTTGTTTCATATTTTGAAACCAATGAGATGCATAATGTCGTGTTGAATGTATTACAATGAAAATTTCTCTATTTTTTGGGAACTTCAATTGTATAAGAGACTAATTGGATTAGATGAATTATTGCTGAGAATAATATTAGAATCTTATGATGTTACAAGTAGTGGAGGCCAGAGTAAGAGTGGCAGAGGTAAGAGTGAGAGGTGCAAAAGATAGTGAAAAGGGGAAACAATGATGACAAAGAGATGACATAGGTTAGGTGAAAGGTGCAAAAGGAGCATGAGAGACAGAGACAAAGGCGGTGGAAAAGGTAAGGAAATTCGATGTGGTTGAAAATAAGACTATATTTTCCGGTTTTCTAAATTTGGAAACGTACTTTAGATAGTTTTTCGCTTTTCTGGAAAACCAGTTTTCTATTTACCACTAGATTTCTTTGAAATTGAGTATTTGAATATGTTTTCCAATTTCCCTTATATTCCTAAAAAACACTCCAACTAAACAACCCCTAGGCTTTGTGCATCGAGGTTCCTTTAAAAGTTTTTTCATGTTAATTTAGTCTTTTTAAAACCTAAATTTATTATTTTAGGACTTAATTTGTAATCCTCCTTCAATAGTAATTTTGTTGAGGCAAATATACATGACTAATGTCAATTGTTGTAGTGTGAGTAATTGGGACATTAACATTTGTTTCTTAACTTGTCAAATAGAATTCAATTGGCCAGTAATAACAAATAAAAATAAATTAGTATATGTATTCATTTTAGCTTTATTTTGTTGATATTTACATGAGAAAATATTTCCAGTTAGTTTAACTTTAGTAGTATCAACAATTATAGATTACTCATGTAATGTATGGTTGTAACATCCCAAGAATACTACTACTAATTATACCATCATTGCACAACAAATTATTTTCTCATGTAATTTATAATTCAAAATACTAAAAATATAAAACTTCATCTTAATACAATTATTCTAGCAAAATATACGTTTTAATGTAACTAAAAATTTCAAACTAGATACAACATGACATACACAACATCAGCTCACCTAATGAACCTTGTCACCTAGTGAGACTTAGGGTAGCTCACCCAGCAACAACCGTCGTTTAGTGAGGACCATGTCTCAAAATGTCCTAGTAAATGGACTTTGCCCAGCAACAACCGTCGTTGAGATGAAGTTTTATATAAATGAACTTTGCTCAGCAAGATGCATCATTGGGTGAAAAACTCTGTTTAATGCAAAACAGAAAGGAATTTTTCCCGGAAAGACTTATCGTTGGGTGCAAAATTGAAAATAGGTTTAATAGAGACTAACTCTTGTTAGGCAAGATATACCGCCAAATGAGACTCTACAAATGGCAGAACCTCTACTATCTAATTCAATTCGAACTTGTTAACATATAATTCATTCATTCATACATTAATTACATTTCACTCAAGTGATTACTAGTATAGTATTTACAGAGATTCATGTCATATCCTTAGTCAAGTTAAAACATAACTTTTATATAAGTTCATACATACATAACTCAAGCCATTACAACTTAGTCTCCTTAAGTAGTTCATATATAATCTATAAAGCCTATCAAACCATTTTCCTCCTCAAACTTGTTCCTCTATCCTCTGGGAACCACTATTGCCATCTGTTCTCGTGCATACCATGATTATCACAACCATATAAAATACACAACAAAGCATGGGTAAGTTCAAAGTAATATAACACGACAATTCAAGCATATACAAGTAATTCATTATCTATTTATACCATTAAACATGTTATCCAACAAATCACATTCCACTTCCAAACTTATGTCTCCGTAGACATAAGCATTCAACATTACACCACCAAATAATCAGATGCTTTCCAAAAAGATTAACTACACTGAATTCAGATACCAAGATAGTGACACATCTGACTTCCCCCATATTGGTATTTGGTTTCTATTTGACTCATCTAATGACTAGTTGAAGTCTAAGCATACTCATTAGATAGCCCATTGATGTCTAGTCCACTTGACCCAACTCTTAACATCCAGTTGTTATCCGAGTACATCATGTGGTGTATCATGGCTCTGACAAGGCCTTAACACCAGTGCATCATAGCCTTAATAAGGTCCTAGCACTGAATCATTGCCCTAACAAGGCCCTAACATCAGGATCACTTTAACCTATTCACATCCTTAATTCAATGTACCACATCAATGGCTTTGTTATCTCCTTGTAACAACTGATCATATAATCATTACTCGTCAATTCATCAGTTCACAACACTTAATTCACCATATAGTCATCAAAACACTCCAAACACAATAGTCCAATCATCAAATACACAAGTCACTCAAATCAAGATCAAAACATAAATCATTTACATAGATTCACAATAATATTATAGTCAACTAGAAATATCAACTAAAAACCAAGACTGAACTTCCCTTGCTGATTCAGAAGAATTATGATAAGATATATCTATACTGATCACCACTCAGAATCAGTAGTAATGAATGGGATTACATTGAATTTCGTCAACCAAAAGCCATATAGGCAAGCCAAAGAAGAATGATGGAAATTAGAGAAAAAGGGAGTGGTAAAGGAGAAACATTCAGTAGAAAAAAGAAGAAAAAAAAAGAAAAGAAGGAAGAAGAAGAAAAGGGGGTCAGCGGTGTGCTTAGTAAGTCTCACTTGCTATTTGCATCCCTCCCTAACACACTTCCAAAACTTCCCAAAAACCACTCCAAACCCATCGAATCAATGAAATAACCATATTGTTCACCTCCTCACCCTATTAAATATCACTTTCCCATAAGTCATCATTTAATTCACTTAAATTTAATCATATATATAAATAAATGACCATATTTCATTCAAATAATATATATATATATATATATATATATATATATATATATATATAATACTTCAACTACATTTTCCGTAATTAATTTATTAATTACGCTTAATTAAATTTAATTCTCTCTTTTATTTATTTAACACACTTATAATATATTATTAAAAAAAAATAGGATCTTACAATAGTCGCATCCCTTAGATTACCAATTTAATAGAACTATAATGAGACTTCTAAACATGGGTTTAGAGAATCCAAATTAACATATAATTTTCCAAAAAATTTGCATATTTTATATAACTTTAAAACATATTTTACTTGTAATGTAAGAAAAAATTGTGTTGGAAAATTTTCCTTTCGTTGATGCATGACGACACTGTAAAGTTTATCTTATGCTATACATCGATTTTTATTAAGCTTGACAAGCAAGAATACTTATAAATTATTAATTTTAGTAGACGGATCCATTGAACCTGTTTAAGGCTTGACCACAAAATCTATTGTTTAAATGATTTAGATAAATCTTGCTACTAAAGAAGTGGACTTTTTTTTTGTTAGTACACCTTTTAGTGGTTATTAATCATTTCATATTATTGATAGTATTGTATTGCTTTTATCCAGATCAAATCTCAATCACAATGTAATTTTCTTGTTTCTAAATGAACTTTTTTCTCTTTTTTAGGTTTCTTTTCTACTTTGAGTAAAGATATGCATGATCTCCATCATAGATTCGCACATATATTTTTTTAAATAATAAAAAATATTTCATTTTATACTAACTAACTCTATTATATCATAATTTATAATAATTTAATAACATGAAATATTTTTAATATTAAAAATTTAAAATATCACAATCACAATGACAGATCAATATAAACTAATAGTGTAAATCAAAATAACAAATTTGTTATGTTATAAACTAAGTTTGTGAGTTTGAGGACTTGCTTGTGAAACTCATGTCTGGCAGTTAACACAAATTTTCTTTATATTTATTCTTTAAAAAAGAAATATTTCAAAAAACCCACTCACTTAGAGATCCGTATGCCATTGTTACCCTTGCTTATTGCTATTTACGTCAAGGACAAACTGAAAGCTGGTTACTTTTATTGGTTGTTGCTGAAATTTGTTGTTAGAATTAATTATCTTTAAGAATCAAAATGTTACATTGAAGAATGATTAATTATGTTGAATAAACATGTTCCTAATTAATGTTACTTGTATGGTAATTATGTTTGTGATTAATTAAATAATGATTTTTAATTCATTATATATTTTGTTTATTTATTAATTTTATACTTAAGTAAAGTTTTAGTATAAATAAAGAGGTACGTGGCTAGTAAAATTACTACGGATAAGTAGCTCGTTAGAAGATTTATTTTTTAAACCTAAATATGAAGAAAAACATTATAGTACCCTTCTAACTTCCAATACTTATATGTTATCATCCCTAGTTCAAAACTAGCTCTTAATCATGACAAAAATTATTGTGAAAAAATAATTTTAAAAACATTTATTTATATGCAAAATGAATAAATCAAATATAATAAATATTATCGTTTAAGAGTAAAAAACTAAAATAGGAGAAAGAAAGTGTAATATGAACATTTTTCAAAATAAAAAAGGATTAATGAATTTATTTACTTATTTTTTTTAAAAAAATTAAATACAAACTAATAAATAATGACTACTGATAATTATTCAGCAAAAAAGAATTAATAAAAATAGCTAGATAACTATCAATACCACTACCATTACTACTAGTATATATACCTAATAGATATGTGTGTACCATAATATCTTGATGTTGTTTCACCAAAGAATATGATCAACTTGTTCAAGTATATTTGTAAGACAACGAGTTGCATATGTATTGAGATTGATTGCGAGTGACAATTTATGCTCTCTCATATCTATGAAAATTAAGGAACCGTATATAGCACGCTATATCTAAAAAAGATGTTATGTAACTAATAGATAAAAATATATTTGGCTAATAAAAATTAAACTACTAACTATATATATATATATATATATATATTATTGTGGATCTACTCAAATTGTACAATTTAAATATCGTACAAATATTAATTGAAACAAGGTAATGCATAATAGTGTAAAAATTTTACAACATCATCTAATCATAATTCATCATTAATTTATGATAAATTTGTAATTTTAATAAAAATTATTGACTACTACTAAACTTATATTAATTAATTTCATGTATTCATAATCTGTATCAAATTTTTATATGAATATAGAATTATCTATTAATATAATAATGCATGTAATTTATTTTTTTTAAAAAAGTATATCTATCCTTCTCGGAAAACAATCTTAATCCAAAATGTATAATTAATTAAGTTTCTCTGAGACAAATATTATGTTGAGAGATTAGTTTAATGAGAAACCCCTAATATACATGATACTTAGTAATAGTTCTCTTCACTGTTAGTTATTAGTCTGGTCTCAATTTTATAAATAAAAACACTTCACATTTATTAAAAATTTAATATAATTTTTATTCAAAATAATTTTTCTTTGAAACTTGATCATCAACAATAAACCAATAATATTACCATATTGAAAATAAAATTTTAATTAAGAGTTTTGATTAGTATACACAGTTTGTAAAAATTTTTATATTAACGTTCAATCACAATATTTCATTTATTGGTAAATTTATTAATTTTACTAAATAATAGTTTAAAAGTCATATAAATAAAGAATTGTTATTTAACGTCAGTGTAAAACTTTTTCACATTATCATTACATACTAATTAAATTCTTTAATTAAATAAAAAATATTTTAGAAATCACATTCACATGTCATTAACTGAGATCAATTAAATTAAAATTTGTTTATATTTAAAACCACATCAAAGACATTTTTTTTTGCTTATGTTAAATATTGGAGGAAATATCAACTGTTATAAGTCAACTTAATTAAGCCTTTAATATCTCAACTTCTACTATTTTATGACCTAAATTACATTCATTCTAATTAACATTATATTATTTTCCATTTTAACTTACTGGATTATGTTCTATATTATTTTTCGTGTTTATGTGTTTGAATATGTACTTGAATTCTTGAAAACAAATATTTTATTATTTTTATGTGCTTTTTTTCAGCAAAATTAATTATGTTTATTCAATGGGATATTTGGATAGCACGGTAGGATTATGAAATTGAATTCATTTTACACATGTAAGGTGGTTCTTTAGGGGTATAAAGGAAAAGGGTGTACTCTTCTATGTACTTATTGTTTTTTAGTGTCTCACGAAGGGGCAACTTGTGCTGATTTCATACCACCTTAATACAAATTTAACCTAAAAAATAGTTGTTGATAGCTATATATAATAATAATAATAATAATAATAATAATAATAATAATAATAATAATAATAATAATAATAATAATAATAATAATAATAGTTTTGATTTTTTTCTAAAAATTCATTTATATTAAAATGGACTTAAATATAATACATTTTTATCTTCCAAGAGTGAAAAGTATATACTTTAGAACCTCTACAGAAGAGGGAATGAAAATGTAATTTTCTCATTTTTCTTTTAGCAAAATACAAATTGATAAATATTAATAACTACCACAACTATCAATACAACTACCATCACTAATATAAAGGAGGGCATATACCAAATAGAGGATAAGATATACCAAATAGGTATGATACGTACCATAAAATCTTCAAGTTGTTTCATCAAAGAATCTCAACTTGTTCAAGTATATATATGTGTAAGACCACTAGTTTGCCATTTGTATTGATATTGTGTGTGACTACTTATGCTTTGATGTGTGAAAATGAGTTACTTTGTTTAAGTTGTTTTTAGAAAAAAATAGAATAATTATTTATTGTAATTTTTATATGTTTAGTTAAAATTTTTATAAAAAACAGAATTGAAAAAAAATTAAAACAATTTATTTTGATGAGATGTTTGGAGTATCTTCTCAAAATAAGTTGATGTTTAAACTAATTTATGAGAAACCTAAAACTAATAAATTAAAAACAAAATACTTTATATAATAATACCTAAACATAAATTTTTTCTGCTATTAAAATATTTATAAATAAATCACTTAACCTTAAGTCTAAACAAATCACCCAATTTATAAGAAAATATATTCAAGTTCTATTGATCGTTCTTCTATTAGTTGTTGTTTTATTTACTTATTATCCTTTCCATCTTGTAATTTTTTTAATTGAAAACCTATAAATAATTGAATGTATGGATCAATCAATAGAGGTTACTAATTCTAACTTAACCAAAAGTCTTCAGTTTGAATTTTAATCATAAACAAGTCATGTTAAATATTCAGAAAATGATCATTATTGATGTGATCTTTGATGATCACGTGCCTAAAGGATCTTTTCTAAGGTCACTTGGAAGGAAAATAAATTTATGGAGAGGAAAGGAATGAGGTGAGGTGCCACAAATACTAGGTTTGATAAGCCAAAGGGGAGAGGCCACAAGGGAGGGGTCCCTTGATAACTCTTAGAAGCTCTCAACCAATATGGTCTCTAGGATTAAATTCAAGTGTAAAAAATACAAGTGAGGGGATAACCTCTTGAACAAGATAACCTAAAAAAGAAGGGTTAGGATTAAAAGGAGAGATCTAAGGGAGGAGTATTGAGAAACAATTCCCTCCTTAGATCATCAAACTTGGTGCCAAAGTTTCTCAAACCAAGGGTCAAGATTCCTTCTTATTAGCTTAGGGGGCTTATGTAGGAAAAAAAGGGTGTAGATATTAAGGTTACCCCTTATTTCCTTCATAAAGACCCAGAAAGCTAAATTCACCCTCTAAATTCCTAATACACCTCCTAAAATAAAAAATGGACTAAATACATGTCCCAAATTAAATTCCTAATCCTCCTCAAAATTAAAATAAAGAAAATTACTTTTTATTAACTAAAGTCCCTAGCCTAATATATTTACTCTCCACAGTAGGTGAAATCTTTCTTTGTCTGCAAGAGTTAGGTCTTCTTTAATTCTTTTAGTCATGACCCTAGTGATAGGTCATTGGCTAGGCATGATCACATCAATTATCGTGTTAAAAATCAGATATATCTTTACTTTACAAAAAAAATAAATTATAAAGGAATAGATATATTCTTATGTAGTCATATATCCATATTTCACAAGATAGGAAATGCGATATTTGCAATTGCCTATGGTCGAAGTAAATTACCCGTGAACATGTGTCTTTGGCTTCTTGTGTTGATGGTTTATCCTATAATCTCTATCTATCATTAGACCTTATAAATAGTCAACAAATTAGCAAAACAAATTGTTCAATCCAAAAAAACAAAGATGAACATGTAGCATATTATGGCCTTTATCTTTGGAGTGACGACATATTCTTCCACTTTAACTGAGAACTTATTTTTGTTATTAAAGGTATGTGTGTTAAAAGTTTATTCTTGTTGTTGTTGGTTCATGTTATACCTGGATGAGATGAGACCTAAGATGTCTGTTATACAAGAGAATTTATTCTCAAATCCTCTAGAATTTAATAGATAATTAATATATAAGAATTAGAGACTTAAAATAGAAAATAAGGATTTAATTGGTTTGATTTTGTTGTTTAGTTTTTGAAAAAAAATAATTAAAAAGTAGTTTTTAAGAATTGTTTTGTGGAAGAAGATAAAAAAAAAATTGTTTGATAAGTGTTGTTTGAAAACTATTTTAAATATATGAAAATGAAAAAGCTTGTTCATATTTACCAAAATACCATTATTAAAAAACACAAAATAATCTATTTTCTTCGTGTTTTGAATTTTTAAAACAAAAATACAAAACTAAAAAGTAAAACTTTTTACTGTTATTTCCATTTTTAATTTTTAATGACTAAAAAATAAAAAACATTTTTGAAAACTATTTTAAGAAAATATTAACCAAACGAGTTTTTTAGCTTTTAAATATTAAAAGAGATTAATTAATTAATATGCACTGATAATATAAAAGAGTTTTATAGTGCATTTAATAACAGTTCTTCACTTATATGACTTTTAAAATATTAATTGGTAAAATCAACAAATTTACCATAAATGAAGGATTGTGATTGAATGTCAGTGTAAAATTGTTTACACGTTTAATTCATATTAAAATACTAAAATAATTTTATGAAACTTCAACCATGACACTAAGTTATTCAACCCAAAGAGAATAGAGAAGTGTTTTTTGGTGTGCCCAAACAAGTAGGTTTTCCTTTTTAATTTTTGAAAAGAGTTTTCAGATATAGTTTTTAAGAACTTTTTTTTGGAAGAAGAGAAAAATTTTTTTTTGGTAAATATTATTTGAAATCTGTTTTCAAAATGTGAAAATGAAAAAAATTTGTTCATATTTATAGAAATTTCATTAATAAAAAACAAAAACAACATATTCTAATTGTATTTTGAGTTTTCAAAACAAAAATACAAAACTGAAAAACAAAACTATTTACGATTATTTCTCTTTTTTAGTTTTTTTTTAAATCAGAATTATTTTTTTAAAACTATTTTCAGAAAACACTAACAAAACAAGTTTTTAGTTTTTAAGTACTAAAATAACAAAAACAATTTTATAAAATTGTTGTCAAACAAGTACTTAGAGAGTCTCCCTTTTATAGGTGAAGCTTGACTTGAAAAAGGTAACAAAATGATATAAAGGGAACAAAATTAAATGTAATATAATTAGAATTTAATTGGTATACACTGTGAGTGTAAATATTTACATTGACACTGACATTCAATCACAACCCTTCATTCATGGTAAGTTTGTTGACTTTACTAATTAGTACTTTAAAAATAACATAACTGAAAAGTTATGATTCAACGTTAGTGTAAAAGTCTTTTACACAGACAATGTATACCAATTAAACTCATATAATTAACCTAATACAAAATCATAACTTGAGTATGGGGTTTTCATTGGTGTGGGAGATCCAATGACCCAATCTAACCCAAAGTGATTGGATTGAGTTTTTTTTTTTTTATAGATTAGGTGAAACGCAACCCAATATCCTATGGGTTGGCTGATGGGTTCAGTGAATTGAACCCAAGACCCAACCCAATAATTACATTATATTATTATTTTAAATAAAAAAATATCTTTAATAATTTAATTTATAATAGTTTCTGAAATTATTGTTGATTAACTAAGTATATTTCTGAAGTTACAACAATAATATGTCCTAAACATGTTACTGATTACTGTAAAAAGATGTCATGTCAAACACTAAGCACATTAGTTTTTAAGACCTAAGCCAATGAATTCATTTTATTGGTAAGACTATAATGTGTCTTTGAGTAAAAACTTTTTAAACATTGACAAAGTTCAGAAAAAATACTTTGTATTGAAAGTATAGATTAATTAGAAGAATGGAAGTAATAATAATTCTACTAATGTAGTAATGTCTTATTATAGATGCATGTGTTATGACTTATGAGAATTAATTCTTCACACTATATGTTTATTTTTATGTTACAACAATGATATATTCTTTTTTTAAAAAAATATCCTAATATATATAAGTTCTATCACATTCAATTTATGTTTTAAAAAATATATTTTTTAACTTGCTAACATAATTAACTCAACCTAACCCAACTCATTCAATGAAGAGTTGGGTTGAGTTGGGTTTAAAGAAAAAAAAAAAAAAACCTAACCCAACATAACCCAATAAATTGTGATTGGGTTAGATCTTAAGTTTGTCTAAATCCAACCCAACCCATGAACACCCTATTGAATCATAGTTTTAACAAAATAAATAATTATAATTATTTAAATGCTTAAAAAGGGTCAGAAAATATAGCTATTGAGTAAGTTATAGGTATTGAGTAGGTGCTAGAGTGATAGACTTATTTAAGTCTCTTGTATTTAATTTTTCTATATATAAAACGGTTAAAAATGGTTTAATAAGGTAAATGATGTAAATTGATTCTACATGTAAATACACATTAAAACTAAAATCATATAAAGTGGAAAAAGACAACAAGAAAATCACTAATTTTTGTGAATAGAAAATTAATTAAATTCAATGAAACTCAAGACTTCATAAAATAAGTTAGGTTGGACTTGAATGAAGCTCATATAGTAATATAGATCTGGTCCTAAATAGATTAGTTAGATGGGTTTTTAAGTCAAGCTGAACTTAAGATAGAAATGGACTTATTTAATTATAACATTATTTTATTTTTTTATTTTTTATTATATATATATATATAATTTATATAAAATAAAGAAAAACAAACAAAGTTAGGACCTATTACCCCAAAACCTAGGTCATAAAAATGGAAAGTGATATAAAATTTGGGTTGATTCCACTAGATCCTTTTTATGCTTTGGTCGAAGGGTGGAATCGAATAAACGAAATATTTTGACATCTCTACCAAATTCTTGATAAGGTTTATTTGCAATTTTCTTAAAAAAAATTAATGAAAAAAAAAATCTAAGAATCTCATCTTCTCATGTGGAGGGGAAAGTAAAAGTAATAGTGGAGGATTTGCACACAAAACTTGATCTCATGCGCATGTCTCATAATTTAACCAAGACCTCAAAAAGTATTTTTTTTATTAGTTAAACATATATGTGTTAGGAGCAAGGTTATTAAAATCGAGAGTTTACGTAAACTCATGAGAGTGTAGTAAACTCGACTCGTAAAATCATAAGAGTTTATTTCATTAAAAATATGATTATAAATCACATAATAATTGAAAGTTTTCAATACATAATAAGTTCAAATCCACATAATAAATTTAAATTACTCCAAATAAGTAGAAATTAAAGTAGGAACACTTAAAATTTCAAAAAATTTTTAGACATAAGAACAAATTATATTCAAAACACTTAAAATTAGAGTCAATATAGAAAAATATTACCTAAGAAATTTATTCACGAGTTTACTCCGATTTTACCGAGTTTACTGTGATTTTACGAGTTTACTTCGATTTTACCGAGTTTACTCCGAGTTTACTACTTTTCCGATTTTACTGCGATTTAACTCGTCCGGGACTTGTAAACTCGTAAACTCGTACAATTTTACGAGTTAACTCGCGATTTTGATAACCGTGGTTAGGAGCAATTCAATAATAGAAGAAAAATAAAACTTCAAGTATGAAGTTTGATTTAGTACCACATCGAATAATCTTTAAGAAATTTTTACCTTCTTTGTTACTATATAACTCACATTGTAATGGTTTTTACTCATAAATACAAAAATAAAATCTCTAGTGTAGCTATAGACAGAGACTTCCTATAATCGATTGTTTACTGTATAATCAAATATATTTTTAATTGATTATATGATAATTTTAATAGATTAAATTCATTCTATTTTATTTTTATTCTATTTTCTATCTATTTATTTTAAATATACTTATTTTTATTCTTTATTGGTATTACTGTATTCACAGTCAAACATCACAATAATGTTTATTTGTGGAAAGGGGTTGTCTAGAAGGAAGCAACATAAAGAAAACATAGGCACCTACTTCCTCAATTAAAACAAGCCTAAGACTTTGTTTCTATAGCCAATGTTGGCCCAGCATTCTAGACAAGTCACATCCTTTTTTATTTTGAAAGAACAAGTCACATCCTTAGAATCCTTTCTTTGCCGAAAGATTAGCTCATAATTGAACAAAACAAAATATATATATTTTTTAAAAATTTAGTTAAATATTTTTACAAAAATAAAAATACATTCAAAATATTACAATATTTAGGTTCGTATTTATTATATTTTAATAATATTTTAAAAATATAAACTAATTATTTATTCTATAATTTTACTTATGGTATGTAATAACACGATTTAACTTATTTAATATATAAAAAGTTTTATAATACTATTTTATTCTTTAGTTTTATTATTTTATTAATTAAATTAAAATTATTAGAATTAAATATATAAAATAAAATTACAATTATTATAAAATATTTTAAATATATAAAATAAAATTACAATTATCATATAAAAATTTTAAATATTTTTAAACAAGTTAATGTGCATTTAAATTTTGTTAAAAATTTCTTATATAGTTATTGATAATAATCAATGCTTTTAATATATATTTATTGATGATAACAATTATTATATTAAGAGATAGATTTTCAACTAATTATCAATTTTCTATGTTTTATATCAACATTGATTTAAATTTTATTATGGGTAGAATAAGTTTTATATTCTTTTATTTTCGATAAAACTTGGTTTAGACATTGTATTTTTAAATGAGGAAAAAAATAAAATTCTTTCTTTACATATTAAAAATGAAATATTTAACATTAATATTTTTATTATTTTTGTAAGCTTTGTAATTTTTTATTATTTTTTCTTATTTAAAAAAATAATTATCTATTAGTTGTAATTAATAAAATTATATATCAATTAGTTATATCAAAGATTTTTTTTATCCAAATTAATCAATAAAACACTTATTATTGATTTTAAAAGATATAGCTTTATACTTTAAAAAAAAGTCTCATTTTTTAATTTATTTTATACATAATAATATATTGGATTGACCATATCTCATATTGATGATTTTCGTTCTCATACGGAAAACATCACATAACACACCTATGATATATTATATTATAGTGAGTATTTATCATTTTTTCACCTTTGCAACATTCTCTTTTTCCTCTTGTTTTAAATGTGTATTTTACACACTATTTTTGTAATAAAATTGTTTTCTCTCTTTCAACCATCTCAAACAATCTTGTATCACAATGTAAATCATTCTTTCATGATTTTAAAATATAGATAATATATTTATTTTTCAAATATAATAATATAATTTTTAGTAAATTGAAATAAATATTTATATTATAAAATATTAATAATAAATTTGTAAGGCACATTTCTATTCCATTTTTTATGACATTTTATGTTTTGACATAAATATTAAAAGTATAATTAATATTTTTAAATTTATAATTTAATTTTTTTAATATATCATTTATCTTTCTAGTTAAGCTGATTTTTTTTAAAAATTTTTTAATGCAATGGGCAACTGCCCAAGACTGGCAGTAAATTGAATCAAGAGATCATTGAACCCAAATCACTTAAGTAAAGTGAAGATAAAGACTATGGTACAAATTGAAATATAGTTTTTTACTTGGTGTATTGTTAAACCTATTTTAGAAAACTACTAACTAGCAAATTTGATTCATAGGGGACATAACCATACTTACATGAAAAGTTTTTCACTTATTTTTAAATCTAGTTAACTATGGGTAAGATTTATGATCATTGGAGTACCTATATATTTTCTAATAGCTACATCGAGGATCAGATTTAACAACTAAGGTACGAAACTCATTCTTATAAGTTAGTGTTAATGAGTTTCCTCATTTATTATAAAGTAAAAACAACTCTCTCTATTGATATTTATGAAAAATATCGCTAAAAGACAATTCCAATCCCTTTACCTTTGCAATTTTAAAATAAAGATATTTAATCTTTTATTTCTTTAAATCAATAATTTTAGTATCATTTTCCCAATAAGATGTTGAGTGTAAAAATATAAGTATTAATTTTCTTATATTACACTCTGAATAATATGACACTTTATTATTTGTCTATTTTTTAATATGATTAATTGATTACTATATTATTTGTTTATTTTAACGTTATTAAAATTATTTGATTTAAGATATGGATATGGATTCATCAAAAGACAATAAAATAGTGTTAGGTGAAAATTACCAATAATATCTTAACAATTAATGTCTCAAAGAAATGAGATTAAAATAATTTTTATTGATAAAGTTATTATGCCCGACAAAATTCTCTCAAAAGTTGTTTAATCTTTAGTATTATATATTCTATTTAAATGTAATTTCAACTAAAAAGTTTTAATATAAATTCTTTTCTTTTTTTTTTTCTCTTTACATTTTAAATAAAACATGGATCACTATTTGGTTTTCTGTCCAGCAAAAATGGGCCGACTATTGTAGTTGTTTTGAAAATGTGAATCACTAAATTTTTTCTGGTTTTAAAATAGTGAGACTAGCCAATATTGTGTATTATAAAAAAATAGGGACCAAAGTTATACTTCAGTTTTAAAAAATTCAATGCTTAATTGATTTTGTTAAAAAAAAAATTAATATCAAGATAATTGCTATCTTTTACTAAAACATTATGTAAAATAGAAAAAAAAATTATAGTCTCCTTTTTTTATAGAACAATGCTAACAAAGCAATTAAAAGACACAGATCAGACAAAATATATAGCCTTTATTTAATAGAAGTAGGATGAAAACATTTTAGCTTTCTATAAATTAATTTTTATATATTTTTTATTATTTTTAAAAGTTTTAAGTTCATAAATCATGTGAGCTGTATTTCTAAATATTCTAGTTTATATAAATCAATAATAAAGTGAATCCATACAGAGAAACAAAGAGATCTAAAACTAAGTCAAACAAGACTTCCACACTGGAAGTGACAACTTTTAAATGAAACTGCAGGAAGGATTCCATGAACCAAATTAAAGATCCACGTCACAATTCCATGACTGGAAAATGGAAATGAGAATTATAGAACAACTCACATGCATATTAATCACCAAATCTCCAAGAATATCAAACTAAACAACACAAAATCAACCACACATGAATAAAAGAATAAGGGAATGGTATGTGACAATTTTGATAATGTAGAAACTAAAAAGACAGGTATATTTGATACTAAAAGTATGACTTTAGTATAATAAAATTAGTTGAAGTTATAAGATGATTTAGATGGATAGGACATAAAGAAAGAGAGAAAATGTTGCTAGTTTGATTTCCTTTGTAATAAAAATAATATTCTGAGCCTTGTTATATAAATAAACCAAAATAAAAGGAACTGCATCAACTTTCTCTTTCTCTTTAGCAACAAGCTACCTACTAGGTAGGTGATTTATCCAACTTTTTATCCAACTTTCTTGTAACACTTGTTTTGTTTCTATAATTATTAGAATGATTTATTTTTGTTTTTATAAAGTAGGATTTACACCTTACTTATATACTATATTAAACAATAATTATTTACTTTCTCCTCTTCCTTTTCTTCTTTAACAATTTTACTCTCTTCAATATTACTGTCTTCTATTGTTTAAGTTGCTCCTATGAAGAAAATGAAATAAATGATTATTGGAATAGCAGAAAAGAGAGTAAAAATAGAAAATGCAAGTTTTTTTAATATCCACGGGTATATGCAAGAATTCGCAGATATTTTAAAAAATATTTTTTTAGAAAAATATTTGTTTTTTGTAAGAAGTTTTATAAAATAAATCCTTTAGTTGTTGAAAAATCTAGAAATAAAATCATACTATTTTCTATAAGATTAATTAGATCTAAAAATAAATTAATATAATATATATACAAAAAATGTTTAATATAAATAGAATCTTTGTTTTATATTATTGATATTCTCATAATAAATAGTTTTATTGATTATGAAGTTTTCATAAAAACAATAAGATTTATATCAATGAAATTTGACAATTAATATTTTAATTTGATTTATTTCATAAAAATATTATTTTTTCAACTTAAGTATATAGTATTTTAATTTAATGGATAACGAATACTATGATACTCACACCTATACTATTAAAGAATGGAAAAGAAAAATTTCATACCCTCAAATAAAAAGTACCAATTGATACTATTTGTAAGGATATTTTTACATATTTTATTTATGAGTATCCAGGAACACCAAGATTACTTAGTGGAACTTCAAATTTCCCACTCTTGTGTAAAAGTGAAAGTCGACACCTCGAAAACAAAGAAAATCATAATTGGCTATCTACTGATATTTTTAAATTATTAAATATTATTTAATATTATAATAAATTTTTATGTTTAACAAAAATTGAAATATTCTATTCAAACAAAATAATTAAAACTCAATAAATTTAAATTATTTTATTCAAACAAAACTTTTAAAAATAATGTCATTTGAATTGGGTTTTATACATTTCAAGTTTAATACATTTTAATATCCTGAATCTGTAAAACCGTACAATTAGAAATCCTGAATCAACCGTACAATTAGAAATTTTGAATTGAGTTTTATTGCTTTCTAAGAAATTCACTGGGCCATTATATAAGGTTTACGGCATTTTCTATTTTCACTTCCTTTTCTGCCACTCCAATGCCTATATTTTATTTTTAAATTATTATTATTATAAATATTGTTTTATACGAAAAATACCCTTATGTATAGAAATAAAAAAAAAACCTATTTTATTTTAATATTTTAGAAACACATGTTTCATTTTTTAACATTTGAACTTTTTAGAATAATAACTTGTATTTTGAAAACTACTTTTCAAAATACAATATTGTGCCGAAAAATAAATTCCACAATATAGAAGTGTTTTCCCAAAAATAATTTTCGAAATACACTTCTGATATTTTGTATTCTAAATAGTACTTTTTGAAATACAATTTTTTAATCTAGAAAGTGATTTCTGGATTTTTTTTAAACTTTTTTCATTGGATCTTTGTCAGTAACTAAAAAAAGGGAAGAATTACTAAAATTGGAGACAATGAGAATAACAAAAACTGAATAGGAATGAGTAGTAGTTAAGAAAAGAATAAGATGTGTATACGTGAGGAGAAGGGAATAGGGAGAGGTTGCGGGTTTGAATTTATCAACTAACAAAACTACACATTAACAACTAATATTTGCCTATATAAAAAAAATAAAAGAATAAGTTAAATGTTAGTTATTCAATTTGGATGACTCTAAAAGGTAATCCTGTGTAACAAATTGGTCAATTGAATCACAAACGTTGGAGGAAAAGAGAATCTTGTCTTGTTGTAGGAGGGGAAAAATTGAGCAAGAAACAAATAAAGACAATTGAAGGCAAATGGATAATTTGAGAGATTGCAATGAAAAAAATGGGAGGGGAGGAGAATGTATAATTGTAGGAAGAATGTAATAAAGAAGAGATGGAAAGTATGTGAGTCCAATTGATTTAAAAAGAATGCACGATAGAAACAAAGTTTTTTTTTTAAAATTAAAAGGATTATTTAAGTAATTTCCCATTTAAACAAAAAAAAATGGATGAATCATTTGCCTTCAAAATGCTAATATACTCCATGCAAAAATCATGACCTTGAGTTGCGGGCCAGTATGTCAATAATTAATTGACTATTATCAATGATATATGGGTAAATAATTAACTGATAAATTATTATCATATCAAAACATAAGATAGCAGCCAAAATATGATGGTTTGAGGGAAGACTGTAAGAAGGCCTCAGATTTTTTCTGAAAAAAAAAAATTAATATGTATGAAAAACAAAATCATAATTAACATTGATTGGTTCACCAATAGTCTTTACAAGAGCATTCACCGTCCTGAAAATGATGAAACCTGTTTCGATCTCTGACAATAATTTTCCTGTTATAAATTTTGGATATCATTTTTGCTACATTATGGCAATCCCAGCAAATCCTCAGGTTCATAACAACCCTAATGGGAATACCTTTCAAACTAATTAGCCCAAAGACTATGGCTACCTTCTCACTATGTTTACTCAAAGCATCCTCCTTCTCCTCTTCTTCTATATCAAAAAGCACAGTATTAGTGTTAGCCACATACCCTGCTAGTCTAAGACACCTAGAGATCTCTTCCAGCTTCAATTCAATCTCACCATATCTTGGGTGAGACTTGTCCCCAACAATGAACTCATGAACCTCACCATCAACTTCTATGACACTACAACCAGGAAGCTTCTTCACTCCCTTGGCCTTCATGGTCTGCCTCAAACTACTTACACTTTCCCAATTCTTATAATCAGCATATATGTTTGACAAAAGGACATAAGCACCATCATTCTTGTCTTCTAGTTCCACTATCTTTTTTAGTGCAAGCTCACCAAGTTCTTTGTTTTTGTGCACTCTACAGGCATGAAGCAAAGCACTCCATGCACCAACATGAGGCTTCATGGGCATGCTGTTGATGAAGTTCAAAGCTTCCTCAAGATGCCCTGCTCTACCATACATATCAACCATTAAGCCATAATGCTCAAGTTTAGGGTCAATCCCATAAACAGTCCTCATTGAGTCAAAATGCTTTTGACCTTCTTCCACCAACCCAACCACACTGCACCCTTTCAAGACAGAAATGAAAGTCACCTCATTTGGCTGAACCCCCTCTTGTTTCATATTGTTAAAAAGATCTAAACTCTCCTCACCAAAACCGTTCATGGCCAACCCACCAATGGCACTGCTCCAAGTATAAACATTCCTTTCCTTCATTCCCCAAAAAACATCCATTGACCTATTAATATCCCCACACTTAGCATACATGTCAACAAGTGTTGTTCCGAGTGCCACACTCATCCTAACCTTGTACCTCTCCACATAAGCATGAACCCATCTTCCATTATCCAAGGACCCCACGTGAGTACACACAGACAAAACCAGAACCATGGACACCTCATTTAACTTCACACCCTCCCCCTGCATCAAATGAAACATATCCAACGCCTCCCTCCACCTCCCACACTGAGTGTACCCCGTAATCATTGCATTCCACGCAACATGATCCCTGTGAGGCATTTCATCGAACATCTTCCTTGCAAACTCAACATCCCCACACTTAGCACAAGCATGCAGCATAGCCGTTTGGGTAACCAAATCCGCTTCAACAACACCTTCAAACACACCATGACAAGAACTGAGACAACGTAATTCAGCATACATGAAAACCAACCCGGATTGCACATGTGGGTCGTGCTCAAACCCACGTTTTATAACTGCCCCATGAACACACAAGCCAGTCATGTGCACGTGGAGTAGGGCGCACGTGCGGACCAGGAACGTGAAGGTGTAGTTATCAGGAGAGAGGGTGTTGGAATTTAGAATTTGAGTGTAAAAATGAAAGCTTTTGAAGGGTGTGAGGCTTTTGGAGTAGGCTCTGATCATGGAGTTGAGAGTGAAGAGTGTGGGGTGGTGGTGATGGTGGTTGAAGACATTGTTGGCATAGTTGAGATTGGTGGGGTTGTTTATGGCTATGGTGGCAACAAATTGCCCATGCAAATGGGGGTGCTTGAGGCTGCCCTTCACCACCAACTGAGCATGGATTTGCTTCACCTCTTTGAGTGTTGTGCATGGATTCAGCAGTGAAATTGTTGGGTGTTTTGCAATCCTTTTCAAAGATTTCATGTTATTCTGTTACATCAAGTGAAAAGTAGTAGCATAAATATTGGTGTTTTACTTATTCATTTTTTTTTCTAGTATTGTTGTTGTTAGAATTCTTATGTTAGGTATGGATACTGAGCTAATCCTCAATGCTAATATGTTAGAGCCTTAAAACATATATTTCAGTATATTATTTTTTGAATTTTTTATATTATGCATATTAGTTTTTAAAAATGTTTAAACATCACTTTTAAAGTGTTTATAAACATTGACTAAAATTATTTAAAAACCAATTTATGCAATAACAAAATTATTAGGAGTTTAATTTGTTTAAACGATTCATTTAGCCATACTTACTAATATGTATATGTAAAATATGTTTAGCAAAACTAGTTGAAAAGTTAGCTGAAATCTTAAGTTAGATATAAGTATTTGTTAAAAGTAACTGATCAACTAGGTGTGAATATTGTAACATGACAAATAAAAGTATAATTAATCATTATAGCAACAAGGAGTATTTAAAATTATTATAATATATTTTAATAACATAAATTAATCACATATTTGAATTATATATTATTATAATTACATATTTAAATTATAAATCTCTATAATTACATATTTAACTTATATTTTTTCTAGAATTAAATAAATAAATTTTAAATATATTTAAATTATAATTTTTATAATTATATATTTGGATTATAAATGACTATAATTACATTAATGAATGAATGAGAGAAAAATGAAGGAGAGAAATTGTATTGTTGGGTGAAAATCTTTTATCTCAAATTTATGTCTCATTCCCTGTTACAACCCATTAATATTTTTCACATCATTTAATTAATTTTATTTTATAAAATTTTTTATATTTTATGTAGCTCATTAAATGAGATGATGTTAATTGATTTATTGGAACTGAGACATGAATTTGGGACAAAAAAATTTTATCTTGTATCATATAAGGAGAAATAATAAGAGGAAGACAATACAATACACTAATGAATAAAGGGTAAAATTATAAGTTAGTAGTTAAAAATAGGAGACTTTTTAAAAAAATGATTTGGAGTAGCTTTTTAAAAAAATTAGTATATCCTAAAGAAATCTTATATTTTTATTATTCAAATAAAGTTGAAAGTAGTTATTCCACCATATCACAAACCTATATTTTTTAGATTAATTTTTGAAATATTTATGGATACCAACATTTGCAAACTGTAGAAATCCTTCTGACGTGACTAGTATGAAAGTGACGAAGGAGGTGCACTGACGTGAAACAAAGAAAGAGATATTTCTTATCCTCTAGGTGTATAGACCTATCTTACATTCTACTTAAAAGGTTTTGTTATTTGCACTGTTTTTATTTGTTAAATACACCCCTTTTATATAATATATTTAATTGTAATCATAGATACTCTTTATGCCAAAACAACTTTTTGTTAAATATAATATATTTGTCACATCAATAATTAACATAACATAATTATCACTTATAGTTATATCATATTAGCAACTCATATAACATGCTACATAGTACATGGTTTGTTGATGTGACACTTATATTGTAGATAACATATTACATGGATTATTGATATGACACTTTAATTACAATTATGGTTTATTATAGTAACAAAGATAAAAAAACAAATATTACCTCTATTCTTTATGCGATTTTTTGTCTAAGAAACCTTTTAATTCTCCAATAAAAGTGGGTGCATTCATTGAACTATCAACTAAACAAGTGTATGACCTTTTTTCTCTCTTAAAAATCAAAAGTCAACCAAAATTTAGAAACTAAAAGCAAACTACAAATATATTCTAGAAAAAAGAACATATTTAAATCATTCCTTATATTAATGCTAACAATTCAAAATTAATTCTTCCTAATTTTAAACAAATAATTTTTTATGTAAGAATTGAAGATTAACTTTACACGTGTTTGGAGGGAAAGAAAAAAGGATATCGCCATTATTTTTGAAGCATTACTGAACTGATTAGTAGAACAATTAATCACTATGTTTTAAACAAAACATTCTTTTTTTTTAATTTTATGGTACTTTTGAACAGCCTTACCTCCATGTATTCATTATCATAAAGTTTTACCCAAACAAAAAGTATATGCATGTGTTTTTTTTTTTTTTTCATAAGAAGAATTTTGTTAATCAAATTAACCTATGACTGTTCATGATACAATTGATAGATGCATCTCAAAAACTTAGCATGTTTCCTAACTCTAAACTAATTATATATATAACCAAGCCACCAAAAGATCATGTAATAAACTTTTTTAAAATAAAGCTTAGATTAGCTAAATATAGTGTCTAAATAAATTACAATATATACTATTACATACAATGGTATCAAAAGCCTCTATTTGGATTTGGGTATATCAAAACGATTAATCATCTCATAAAATATACAGAAACAGCTAGTGATTTGACAACAACAGTAAATAATTTAATAGATCTAATAACAATTTTTAACAATATCATTAGAAAATCCTGTGTTATAAATATAATTTAATCTTACAAAATTCACTTAATTTTACACTTTACATATTTCATTATATCATTGATAGATGTGAAATTAAAGTGTTTAATTAGAGACAATTATATGCATTGGGGTAATTCACATGCATGCATAGACAGTAGTTGCACCGGCATACCCTAATTGATGTCGACACAGAACCCTTTCTATGATGTCCCAAAACGTGAACAATGGAAAATGCTACCCAATAAAATAAAATAAAATAACATGCAAATGTGGTTAAGACTTAAGAATTAGAGGAATTACAACTAGTTTGAAAGCTGCAAGTCATGTGGCAGGCAAGCCAAAAAGTCATGCCTCAAATCTATTCAGAAAATTTGAAATAGCTATGTCTGTTTTTGGTAATTAGGTACCTAGTCTTTTTCTTACAGAAAATAAAATGTATACAATAGGAAATTAAACATTAAGAAGTTTCAACTTTCCAATACAAGGCGATATGTATACGTCTATATATACATATTTTTTATTAATAAATACAAGGCAATATGTATATATACATATTTTTTATTAATCCTATTACTGGTAAGAAATATTCACTTTTCGATAAATTTGATTGATCACATTTAATGAAATCTCGCTTTGAATTAAGTTCTTTTATATACAAGATTCAAATACATATATATATATATAAAAGATAAATTCAGCCCTATACACCAAAATTCAATTTTAGTTTTTTGTTCTTTTTTTAATTCTGATTTTTAACTATTTATAGCTGTTTTTAATTTCATTAATCTTTTATTAGTATTTCCTCCCTCCTGTTTTAAAACTATAGTTGTTTAGCATTATAATTTTGTTCCAAAAATATAATTTTTAAAAAATTTAAGAGTACATCTCTATATATTTTTTAAATACACTCTTATCTATATTAAAAATTACATTAGCTTATTTGACTGGTTTCTAAGCGAATGATATCAATGAACATGTTAATGACCAATAATAATTCCAATAACATTAGGTCCATCTAACAAATATGCTTTAGTCTATAAATATGCTAGTTAATAATTTTTTAATGAATGTATGCTATCCATAACAACTATACTTTTAGAATTTATTTTTAGTCATCATTCATCAATGTATTATACCAATAGCATTATATCATCAAATAAAGATATTTTTGTCGACAAATATAAAATGAATATATACTAACCATAAAGAACTATTAGATTTTAGTCATGAATGTATTATGGATTAAATAGAAGCCTGTTTATTAGTATTTTTATCATTATCACATTAACTTCTTGTTAACATTTAGTATAAAAAATTAGATTCGTTAAGTGTGATATGTTAATAACTATAAAAAATTAGTATCAAAATTTAATGTTCTACTTAAGAATTATTTTGAATAACTATTATTGGAAAAATTTGAATAACTGTTAAAAATAACAATTGCATAAAAAATTAACATTATTTATAGAAAAGACCCCAAGTTATTAAAAATTAATTATTAAAATTATATTTGTTGGTATTCGTTCAAAATTTCACACAGAGAATTAGTTACGGAGTTAATTCACATGAGTTTGTTTGTAACTTTTTTATATATATATATATATATATATATATATATATATATATATATATATATATTTCTATTTTGTAATTAATTAGTGTTTACACAGTTTCTTGAGAAATCAACACAATTTTTCTTTTTGGTTTTCAACTCTTGCTTTTTTGTCTCATTTGTCTTGCTGTGATTATTGACACTTTCGGAGTTCTCTTAGTGAGTTTCTAATTTGAATCTCAACAAGTGTCATCGTCTTTGAGAAGTTAAGGAATACTTTCATATAGAGGACATTTACCATTGAGGGGGAGATTGTTAAGTTCAAGTGTGATAGAAAATCTCACACTGGTTAGTAATGAATATATTGAGCACTATATGAGTAAGGAAACTCATACACCTAATGCCTTAAAGTTTTGGGCATTGGGCTCGCTTTCTATGTGGAGAAAATACCCAAATTGAGAAGCCCACTTGATATCTTCTTTAAGCTAAGTGGAGAAGGTGCTTTGACACAATAGAGAGTAGATAGAGAGAAAGAGAGACCAATAGATATTGCTTCATATCGCTTTCTATGAACGATACTGAAACAAACCAATTGTTTTGAGAGAAAAGAAGAGAGAAAATTATTCTTGGTTTTACATAGAACTGCAATTGTAAATTCACCACTGTAGATTTGTTCATCGTAGGATTGGGTTGATTTTTGAATAACACGTTCAGAATGTATGTTTCTTCATTCTAACCGCTCGAATCATTGAAAAGAGTTCTAATTTGAGAGATATTCAATTCGTATGGAAATAGTGTTTTTGGGGGGTTTTCATCTTACTTGTTCTCTATTTGTAAGCGTATTGCTTTATTGTTTGAAATTGATGTTGACACTTAATTGATACTTTTTTGTACTTTTTATTGATAATAGAGGAACTATTTCTTTGGTCCGGAAGACTCATGGTTTTTACCCTTGCTTTGAGGGGTTTTCCACGTTAAAATCTTGGTGTCTTATTTTAAAACAGTGGTGATTGGTTAATATTATATTTTTTATATTGCTTCTCGTAGATTCTTGCAAGATAGGTGGATTTCTTTCCGCTGCTTTGTTTACATTTGTTACAAACTTATCTTATTACCCTATCAGAGTGACATAAGAACTCTTTGATTTTAGTCGAAGGACTATTTGACTTGCTTGAATGATGGAAGCAAATACAAAATTGGTTGCTTTGAATAACACTAATTATCATTTGTGGAAGGGCAAGATGAAAGACTTGCTATTTGTGAAGAAAATTCATATTCCTGTTTTTGCCATTTAGAAGCCAGATTCTATGTTTGAAGAAGAGTGGAATTTTGAACACGAACATGTATGTGGTTTTATTCGGCAATTTATAGAAGACAATGTTTATAATCACATTACTAATGAGACACATGCGAGAACGTTGTGCGAGAAGATTGAGTCTTTGTATGCTTCTAAATCAGGGAATAATAAATTGTATTTGTTGAACTGTTTGATGAATTTAAAGTACAAGGAAAGTTCTTCTATTTCAGATCACTTGAATGAATTTCAAGGGCTCCTAGATCAGTTATCTGGTATGAGTATCAAATTTGATGATGAAGTTTTGGGACTATGGCTACTGAATACTTTACTTGAGTCTTGGGAGACATTTCAGGTTTCTATTACAAACTCAGACCCTAATGGTGTTGTTTCTTTGCAAGCGGCAAAGAGTAGTGCTCTTAATGAAGAAATAAGAAGGAAGACACAGGGATCTTCATCTCAGCCTGAAATACTTGTCACTGAAAACAGGGAGAGAAGTCAAGCAAAGGAGCTGAAGGGTGGTAGAGAAAAGAGTAGGAGTAAGTCCAAGTTCAAATCCAATAATATGGAGTATCACTATTATCATAAGACATGGCGCATACACAAGTATTTTTTCTGAAAAAAAAGAGAACAAAGATAAAAAAGGTAACCAGAAAGAGAAGGATCATGATGATGATAATCGTGTTGCTATTGTTACTTGTGGTGATCCTGTTAATCTCCATGACAATGAGTTAGTTAATCTTGTATCAGATGAGAACATGTGGATTGTTGATAGCGGTGCTACACTGCTGCACTGCATGTTACACCAAGGAAGAAGTTTTTCACATCTTCACTTCTGGTGATTTTGGAGTATTAAAGATGGGTAAAGGTGGTGTGTCTCAGGTGATTGGTGTTGGTGATGTTTGCTTGCAAACCAACATGGGAGTGCAATTGTTGCTTAGAGGTTTCAAACATGCTCCTGATGTTCATTTTAATTTGATATCTGTACAGATGCTTGATGATAGTGGTTATGATAACCATTTTGGTTCTGGAAAGTGGAAACTCACAAAGGTAACTTTGTTGTGGCTAGAGGGAAGAATATTTCTAAAATGTATTGGACAAAAGCTTTGGTTACTAAAGATAGTGTGAATTTTGTAGATATGGAGGCATATTTGCGGCACCGAAGGCTTAGTGATATTAGTGAAAAAGGGTTGAACTGCTTAGTTAAAAGGGATGTTCTTTAAGGGCGAAAAAATACAGAATTAGAGAGATGTTCTCATTACATGACTGACAAGCAAACTAGAGTATCCTTCAAGAAGCATCCACCCTCAAAGAAGTCAGAATTGTTGCAATTGGTGCATTCTAATGTTTATGGTCCATTTAAGGTAAATCCTTTAGGGTGCACTTTATTTTGTTACCTTTATTGATGACTGTTCCAAGAAGCTATGGGTCTATGCCTTGCAGAGAAAAGACCAAGTGCTAGACAAATTTAAACTATTTCATGCTTTGGTTGAAAGAGAGTCAGGCAAGAAGCTGAAATGTATTCGTACTAACAATGGTGGTGATTATTGTGGACCCTTTGATGTTTATTGCAAGCAGCATGGTATTGCACATGATAAGACTCCTCAGCTAAATGGTTTAGCAGAAAGGATGAACATAACATTGCTTGAGAGAGTGAGATGTATGCTCTCAAATGCTAAATTACCTAAGAATTTTTGGGGTGAGACACTGGACACAGTGATGCATGTTACTAATCTCAGTCATACTATTATTCTAAACAGTGAATTTCCAAATAAAATTTGGTTTGGGAAAAATGTGAGCTATGATCATTTGCGTGTCTTTGGTTGCAAAGCGTTTGTTCATATTCCGAATGATGAAAAATCCAAGTTAGATGCAAAGACAAAGCAGTGCATCTTCATTGGTTATGGTGAAGATGAATTTGGCTACAAGTTCTATGATCATATTGAGAAGAAGCTTGTTAGAAGTCGTGATGTACAGTTCATTGAAGACCAAACGATTGAGGACATTAATAAGGTGGGGGAAGACTACACTTGAAAAGGATAGAAATCTGACAGATGTTGATCCTATGCAATTGTCTATTCACGATCTAGATAATGTTAAAGGTAGTGTTGAACATGGTGAACAACAAAGTGCTGGTGTTAATCAATAGCTTGAAAATGAATTATATGTTCTTATTAATGATGACCAGGAGGAGCATGAAAGGTCACTTAATGAGAATGTTTATGATGTACCTAAATCCTCTCAAGTCCAACTTAAGAGATCTAATAGACAGAGACAACCATCTACTAGGTATTCTTCTGATGAATATGTGAATTTGAATGATGATGGAGAACTTGAGTATTTTGAAGAGTGAAGAAAAACAACAGTCGCTTGATGCAATGCAAGATAAGATGAAATCCTTGCATGATAATCACACTTATGACTTGGTGAGATTGTCTAAGGGTAAAAGGGCATTAAAAAACAGGTAGATATTCAAGGTGAAACATGAGAATAATTCTATGTCTCCAAGGTATAAAGCTAGATTAGTGGTGAAAGGCTTTAGACAGAGAAAAGGTGTCGATTTCAATAAGATTTTCTCGCCTGTGGTGAAGATGTCATCCATTAGAGTCGTTTTGAGTTTGGTAGCTACTCTTGATTTGGAGGTAGAGCAAATGGATATGAAAACTACTTTCCTTTATGAAGATTTAGAGGAAGAGATTTATATGAAGCAATTTGATGGTTTTCAGGTTAAAAGCAATGAAGGCTATGTGTGTAGATTGAGAAAAAGTCTATACAATTTAAAGCTCCAAGACAGTGGTATAAGAAGTTTAAATCTTTTATGTGTGAGCAAGGCTACAAGAAGACTACTTCTGATCATTATATCTTTGTTAGAAAGTTTTCTGATGATGACTTTATTATCCTGTTATTGTATATTGATGACATGCTTATTGTTGGGAAAGATGTTTCTATTATTAACCTGTTGAAGAAGCAATTGGGCGAGTCATTTGCCATGAAAGACTTGAAAGCTACTAAGTAGATTCTTGGTATAAGAATCATCGGTGATAGAGAGAAAAGGAAGTTGTGAATATCACAGGAACACTATATTAAAAAGGTGTATAGAGATTCCAGATGGAAAAAGTTAAGCTTGTGAGCACTCCTCTTACGAATTATTTTAAATATAGTATTAAAAAGAGTCTTTAAATGAAGCTGAAAAATTGGACATGGAGAGAGAGTTCCTTATGCCTCTGCACTGGGTAGTTTGATGTATGCAATGTTGTGTATGAGATCTAGTATTGCTCATGTTGTTGGTACAATCAGTAGGTTTTTGTCAAACCCAAGTAGAGAGCATTGAAATAGATTTTGAGATATCTTCATGGTACTATTGATAAGAAGCTTTGTTTGAGAGGTCATAAACCTATTTTGGTGGGTTAGTCAAACTCATATATGGGTGGAGACATTGATTCCAGAAGGTCTACATCTAATTATTTGATTAAGTTTGCAAGGAGAGCTATGACTTGACAATCTAAGTTACAAAAGTGTGTGGCTTTGTCTACTACTGAGGTGAAGTTCATTGCAATTACTGAAGCATGCAAGGAGTTTCTATGGTTGAAGAAATTCTTGCAAGAGTTTGGTTTTGTGCAAGACAGTTATCCATTACTCATTGACAATCAGAGTGTTATCCATGTTGCACTGTCAAGAGGAAAGTTGAAGTTTGTGTTGAGATCGTCGGTTTGGAGGTTCTCTCCACATAGTCGTGAGGGGGAGATTTGTTGAGTATTTAGATCCCTTCTTATGTGGAGAAAAGGCCTAAATTGAGAAGCTCACCTGATATCTTATTTAAGCTAAGTAGAGAAGGTGCTTTGACAAAATAGAGAGTAGACAAAGAGAAAGATAGACAATAATACTGAAACACATCAATTGTTTTGAGAGAAAAAAAGAGATAAAGTTATTCTCGTTCTTACACAGAATTTCAATCGTAAATTCACCACTGCAGATTCGTTCACCGTTGGATCGAATTGATTTTTGGATAGCACGTTCAGAATCTATGTTTCTTCATTCTTACCATTCGTACTGTTGAAAGAAGTCTGAGTTGGGAGATATTCAGTTTGTATGGCAGTAGTGTTTTTGGGGTTTTTCATCTTCCTGGTTCTTTATTTGTATGGTTATTTCTTTATTGTTTGAAATTGGTGTTGATATTGATATTGTTTTTGACACTAGCTAGAGACTATTTTCTGCCCTTTATTGATAATAGTTGAGCTATTTTTTTTGTTTGGACGACCTGTGAATTTTACCCTTGCTTTGAGGGATTTTCTATGTTAAAATCTTGGTGTCTTATTTTAAAAGAGTGGTGGTTGGTTAGTATTATATTTTTGTTATTGCTCCTTATAGATTCTTGTAAGATAAGGGGATTTCTTTCTGCTGCTTTGTTTACATTTGTTACAAACTTATCTTATTGTCCTCATCACTTATATGGGGTGTACTCAAATCCATTGGTTGATTATCTCCCATCAGTGGTTAATGCCTCGACAACCCCAACTTGTTGTAAACCTAATATGTGGCACCAATTGTACATAAATAACACAATTCAACAAAGATAAGAAGTCATGGAAATTAAGTTCGATATTGAGAAGTTATCTGAAAACAACAACTTGGGTTGTGGAGATGAATATGTAAGGAAGTGCTAAAAAGGGAGATGAATATTCGACAAAGATAATTTCATCTTGGTGCAACAAGGTTGTAAGAAAGTGCTAAAAAAGACGATGAATATGTAACCATCTTTGATGTTACAAGAGAAGAAGATGATGATTGATAGAGCTTGAAGCACTATCATCTTGTGTCTTGGGGATAAGGCACTAAGGAAAGTTTTTAGGGAGAGAATCGCCGCTAAGATGTGGGTTAAGTTAAAGTTATTGTATATAACAAAGTCTCTGACCCATATATAAATTATGTTTTAAGTATCAATTTATTTCTTCAAGATGACGAAGTCAAGATTGCTGGAAGAACATCTAGCAGATTTTAAAATTGTGGACAATCTAGAGAATATCAACTTGAAACTTGAAGACGAGATAAGACTTTACTTTTCCTCAATTCTTTGCAAAAGTGCTTTGGGCATTTAAATGATGCTTTGCAATATGGGAAGAACAAACAATCATGTTGGAGGATGTTCAGACCCCAATCAAACCAAGGAGTTTTGGAAACTCCAAGATTCACAGACAGTGGATGTGGTGGTTGTCTAATTATGACAAAGGAGAAGGGAAAGGAGAAGGAGAGAAGGAAAAAAGTTCAAGAGTAGTTAGGAAGGGAAGCCTGATTGGAAGAAGTAAACAAGATGTTTTGAGTGATCAAAACTTAGTCATATATAAAAGATTTGTCCTAAGAATGGAGAAGAGAACCCTTAGAATTTGTAAGAATTTGCAGATATTGTGATAAATTCCATTGAAGGACTTATTTGAGAATCTAGAATTGAAAAAGGGTCGGACAATCCTCATTAGGAACAACAAGGCCTATAAAGTGTAAAGTATAGAGAGGATCAAACTCAGGATGTTTGACAACCATGAGATGTTATTGCGGAGGTGAGGTATGTTCCAAATCTTAAAAGGAGCTTGTTATCCACAAGTATGTTTGATACTTTAGGCTATTCCACCAAGGTTGACCGATGGGATGATAAGGTTGTCTAATGGAGTGTCTATGGTTGCTAATGGTGAAAAGTGTAATGGGTTGTACATCTTAGATGGTTCTACCTTCATTGGCAAATTGGGCATGTGTATGTTTCCAATAAGACGATGCAGGATAAGCCTAAGTTGTGGAATATGAGGTTGGACCACATTATCAAGAAAGGCTTGGTGGAGCTTGAGAAGAAACAATTGAAAAGTGATAAACTACATAAGCTAGGTTTTTATGATCAGTGCATTTTGCGAAATCTCATAGGTTCACTTCGGGATTGGTAAACACATCCAGTAGATCATTTAAGTATGTTCATGTGGACCTATGGGATTCGTCTAAAACACAGACTTATGGTGGATGGTCTTATTTTCCTACTATCATTGATGACTTCTTACAAAGGATCTATATCACCATTCTGAGGAACAAGGTGGAGACGTTCCATAAGTCTAAAGAATGATATACCTAGTTTCAAAATTAGCAAGGGATCAAACTGAAGGTACTTAGAATAAACAATGGTTTGGAGTTTGTTTCAAAAGAGTTTGTTTCAAAAGAGTTCAACGAGTTTTGCAGGAACCAAGGGGTGAAGATACATAAGACAATTATAAGGGCTTAAAAAAAAGGAATTGCTAAAAGGATGAACAAAGCTATTTTGGAGAGAGTGAGGTTCATATTCTTGGGAGAAGGTTTGCCTAAGAACTTCTAGGGAGAAATTAATAGAACAGTAAATGTATTTGATAAAAGGTGTCCATTGCTTGTTCTAGAATTCAAAATGCTTATGGAAATTTGGAGTGGAAAACCAGCAAACTACTTCAATTTGAGGGCATTTGAATCCTTGGTATTTGCACATGTCAAGCAGGACAAGCTACAAGTATGAGCTAAGAAGTGTATCTTTCTTGGACATATTGAAGGATTCAAGGGATATAGAGACATTACATTTGATGAGACTAGAATGAGTATGTTGAGTGGATGTTTTGACGAAGGAAAGAGAAGAATCATGTTAAGGTGGAGTTGTCAACTAATAGCATTAGATAAAAATGTCTTGTGGAGGTAGACAATCTATAAGACAACATAATTGGGCCAACAATGTTTGACTTCGGAGGGGGGGAGAGGGATAGAGCATGCTACTTCTGATTACCAATTATTGCACGATAGGAAAAGGAGGACCATTAAATCTTCTCAGAGATTTGGTCATGTTGATCTTATATGTTATGCTTTTAGTGTAGCTGAAGAAATAGAGTTTAGAGGAATTGAGAAACTTCAAGGAGACACAAGAAAGTAAGGATAATCATCTATGACAATATGCATGACGAAGAAGCTTGAATCTCTCAAGAAAAACCACACACGAAAACTAGTGGACTTACCCAAGAATGAGAGGGTGGTCGAAGACAAGTGAATCTTTAAGAAGAAAGACGTAATTTTCTTTGGTGGATACGAGATTCAAGACTAGGCTTATGACTGGGTAAAGCAAGTAAGAGATTGGCAAGTTCAAGATGAAGGTGAAGTTCATCAGGAGTTAGTGGAAGTCAATAAGAAGAAAGATGCATATGAAGTCCTTGATGTTCAATGCATAACCTCTTTATTCTACAGTTAATAGACTGAAACATCCTCTTAGTAGCTTCTAGGTATATTATGTCTCTTTCATAGATCACATGAGTTAGCTATGTCACATGATTTGTTTGTAGCCTATATATACCTTTGGGTAATAGTTTTGTAACTAACTGGTGTTTGTGCACTTTCTTGAGAAATCAATACAATAGTTTTTTCTCGTTTTCAACTCTTATTTTTTCTCTCATCTTCTTGGTGTGATTCTTGGCATTTACTGAGTTGTCTTGGTGACTTTCTAATTCGAACCTTAACAGTATTCTATATCATGAAATATAACTCTTTTAATTTTTCTCAAATTTTCATATACTTTTGAAAAATATAAACAATATGTTGAATATCAAAAGAATATAGGTCTAAGTTTAAAATGGATGAAACTGATAAAGTCAATTTATTTTTAAATTAAACATATAAAAGTATAAAATTTTGAAAAAAAATTGAATATCTAAAGAAAAGCATTGAGAGAGGAAATAATTTTTTTGCAATTTGAAGGGTTTATTAGGGGAGAGAAAAAGTGTGTGAGATTTATCCATCTTTCCTAGAGACTAGGATGGTTGAGCCTTAAAGAAACCCTTCTTCCTTATGGATTCATACTAGATAGTTTCGTCATTTCATTCCTAACAAGTATATTGTAAGAATTAAAATAAAGTAATAAGAATGAAAAGGAAGTTTTACAAGGCTCTTTTAAAAATCATTTTATAAGAATCAAAATTAAAAAAAATTATAGAAATAAAAAATATTTATTAGCCTAAAATCAAATATTTTAATTTAGTTTTACTTGCAGAATCCTTAGCATTTAAGAGTATGTTGCGAAACCATTATAATTTATTTTTTAGATTATAAGTTATTTGCATAAAAAAGATTATAAGTTGTTCTTAAAATAAGTTGGATGCTTGGGGATCGATTTTAAATTTACAAAACGATTTTATTTGAAAAATAAGATGTTTTTAAGAAGTTAAAAATTTATAGATTATTTTTAACAACTTATTTTTTCTTTCAGTTGTTTACATATACTTTCTTTACTATATGAAAGCAATTTTTTTTTGTATCAAAACAAGATTAATTATTTTCCAATCACTTTGTAATAAAATTACCTAAACAAAAATAAATTCTAATTATAATCAATTATACTTATAATTGACTATTAAAATAATATATTTTTTTTAAATTTTCTCAAACATATTCTAAGACTATAACCGAAGAAATGCTAGCAATATTTATCAAATATGTGCACTTCCTAGTACTCTATTATTTGTTAAAATTTATTTAAAATCATAAATGTTTGTGGGATCCACTTCTAAATCATAGGAAAATAGAGTTATTAACACAATGTTTGATTGAAGAGTAAGAAATAAAAAGAGCAAGAGAAAAGAGGAAAATTGAAGTGAAAATGAAATAAAATTATGGTTGTTTGATTTCGATAACAAAGTGGCAAGGATTGGAATATAGGAAAAAATTGGTTGTTGTACTTAATGGAAAAGAAATGAAAGACCCAAAATAATTGAAATAACCTCATGAATAATATATATACTTTATTTGTAGTTTAATTATAAACGTTGCAAACAAATATTATGTTATGAGCATAGTTGAATATATACACTTGTCGACAACAATGTATAACATCGAGGGGATAGTAAGATATTATAATTATACTAAAATATCTTTAGATTACGAGACCATTCTTTAAGACATATTTAGAAATGGAATGAGATATCGAATTATGTGTTGTCCATATATACAAATTAAATTTTATCTTCTAGTTATTATTAAATTTTTGTTATTTTATTATTTTAATAATTATTTTCTGCGATTATTATTTCTCATTTCTCTTAATAATTTTTTTCTTACCTTTTATTTATATATATATATATATATATAATGTGTTAATTTTATTTCACTAAAATCAAAATGTATTATTTGACCAAATATTTCCTTTAGTCCTATTTGTAAGACCCAAAATAAAAGTATTATTTGATTCTTTTTATAAAACCCAATTCATAATATTTCTTTTATTAATTATTTTTATACTTAAATACTCCTATAATTTAATAAAGTTGACAAATAATTAAGAGAGAAAAACTGAGTATCAAAAGATACGCAGATGGTGTTGAGAAAAAATATGTGCTTACAACATGTTTATTGCTATCAATTAAATAAACCGCTTCTTTTAATTTTAATGAATTAATTGAATCTTATAAATAAGGATCGAAAAGAATAATATAGTTAAATACTGAATAGTTTTATTATAATATAGTAAAATGGTAAAAACATCTTGTTATTTCCAATTATTTATTTAATTTTGCTCATCTTTACATTTCGAAGAAGAAAATGAAGAAAATTGAAACGTGTGGAACTCACTAATTTTGTTGATTTTCTCTGGATTTAAACAAATAGAACTTTTTCCGACAATCCCCTTAATTTCGTAGTGGGTTCGAATCAAATAATAAAGTGTTAGAGAAAATATAGTTATTAGGTAGTATTCCTTTTATAATATAAAAAAATATATATCATAAATTCCTTTTGAGTTTAATACTTTAATTTGACGTACACGCATGAGTTTCATCAACACAACACATAGCGTGAGCACATAGTTTTTATGGATTAAAAAAAAAAAACCACATAGTGAACAAAACAGAGAATCATAAAAACAAATAGCTTTTAAAATAAGAATACTAGGATGAGTGCCCTGTTAATTAAAAAATCAAGAAGAAAATATGATAGTTAATGTAATCAAAAGTATTTTTAGACACTGAATTTCCGATACCATCAAAATAAATACGAGATATTAATTAAAGATGCAAAATGGTTTAATTACTCCGCCGAAACCCAAATTTTTAGCATAGTTGTACTTAAATTTTTACTTTTTGTAATTAGTTACTCGAAGTTTTAAAAAATTTATAATCATGACCTTTTGGTTTTATCATCTATTAAACAACTGGTTAAGATCAAATAAAAAAAAAAAACCATGTAAAGAGGTGGATTTATTTTTACTAAGACCCGCATTTTTGGCCAAATAAATTTGAAATAAATACTTTAATTATTTTGGAGGTATTAATGTGACGCTGTATGTAGTTTAGACACAAAAATACTTGACTTTGATTCACGCTTACATGTGAATACATAAAAATGTGTTGGAGTTAAATTAACTTTTCTCTAGGTGACAACTAATCTAACATTAATTATTTGTTACGCTTTTTTGGCATTAAAAAAATGAAATATTTTCTTAAAATTAACCAGACTTGTTGACTCCAAGGACCTAGTTATAGATTTTTTAAAATTTTGGATAGTTAATTACAAAAATTAAAAGTTTAAGTATAATTATTTACAATTTCCCTAAAAGTTTTGGTGTACCCAAACAGTCATTCAACCATAAAAAGTATCTTTCAATTAAGAGGTTAATAACACACTTTCTCATTTATTGTTTAGAATATGTTTTTGTTATTGTTTTAAATTTCTTGGAAATCACATGCGTTATATAGGTTTCATCTAATTTAATTACTCTATCTCTTGATTTATTTTTTTCTTTTTCACTTTTAACGAATTTTAACAAATTTCCACTAATGTGGATAAGAATATATTAAAAAGTACTTTTTCCGTATCACTTTTGTCAGAACTATTGATGTTTAGAGTTTTAAAGTTTAATTTTCTTTTTAAATTTAATTAGTATAAGGTAAAAGTTTTATATAGACGTTAAATTATAATTTTTTATTTATATAAAATTTAAAATATTAATTAAAAAAATCAACAAATTTATTATAAATAAAATATTGTAATTTAATGTTAATATAATATTTTTTATAGTACATAATTTTTTTAAGGTATAAAAATTTAATTAGTTATGTTTCTTCTCTGATATACCCATATTTAATATCTACAATATATAAAAAATTAAATAAGAATGTTTTAGCAAAATATAATAATATTTTAGTTATATTAAATGTTTCTTAATCTATGTAATAACCTTATATATAAAAAGAAATGGGATAGTGAAACTATATTACTAGCATTTCTGATTATCGTTTTATGTAGTCTTAAGTTTCTGATTATATTCAGTTCTAATTCTATAAAACACATGGTTGAAGTCACATTAATTAAATATATTATATTTTTTAACTTAATCCACATATAGATAATCTTTGAAAAAGAAAATGTAACTCTAAATTCTATTGTTCCATCCTCAATTCTTCATGGAATGATAAAGAAAGAGTCCATTTCAGCAGGTCATTTTCATTTTTTTATGTAAAAAAGTGGCAAACTCTTAAAATCAGCATGAGCTTACCAGTCCTGCAATCCACAGATTGATAAATGGTTTTGGTTTGTCCATGCATGTGCGGTATACTTTATTCTGCTTTAAACAAAAACTAGCAGACAGAACCAAACGAACAAGTTACATAAAATGATCCTTGCATTCATGTGTCTTGTCCCTTCATTCAACAATGACAGGTCCATGAACGTGTCTACATTTTCACTTCCTTTAGGGTGCTCCAACTTGGATGTTCCCATATATCCACGATCTGGATACAATTATACCAGTACTAATACACCACATCTCATGAGAAAACTATCCCGTTAGCATGTTTTGGACAAAAGTAATAGTCAAATGGGTAAACTCTTATGAAGTACTCATTTTCGAGTTTTTACCATGTATCTTTTACAAGACTTATTAATAATCGTATAAATAAGAATGTGATTCTCGAAGCAAGTGAGTCTTATTAATTAATTTTGTACCTACATACCTATAAAAAAAATTTGTACTTGCACTAATTAAAATATCAAAGTATGTGTCTTTCTTCTATTCGGTCAATAATGCTTCACTCGTAGTAAAATCCTAATAAGAAGAACATATGAATACCTATAAAAGATACTTGACACTGAAGTCAAAATGAAATTGACCTTAAGAGCCTTTAAAGACAAAAGGTACATACTGCTCTCAAAATAAGAATATAATAATGAGTAGTCAAACATGAATAATTACTCTATATTTATAGTTATACTTACTGAGCTTAGGTTATGTAATTAGGGTTTTGACCTATGTAAGGGTAAAAGAAGGTTTATAAAAAATGGTTACCTTTAGTGCTTCTATATTCTATTTCTACCAAGTTGTCCTCACGGACATTCTAGCTTGAGGAACTTTCGACATGTTCCATTTAGGTTACCTTACCTTCTGTATAGCAGAATGCTATGTTGAAGGAGTGTGTCCAATATACAAGTCTCCTAATGTCAAGATATACGATAAAGACGTTTCAAAAGTGGCATCAAAAGGTGTGTCCAATATAAATTTTCTCTTTTATTACTAATTTCTTAGGATATTCATCTCATTTGAACGTTGAAGTGTCTTTACAAGTATTATATCCATATCCTAATAACTAACTACTAGATGTGAAGATTATTATGAATATAACCTCATACCTTAAAAAAAATTCAAGTGATAGAACTATAAGCATAAAATATCTGCATTATTTTCTCCATGTATTGAAACCAATGGAACAGAACATTTGCAAATCTTGCTACTCACAAGTACGCCAACTCCAACACCATGTAATCTCAGGAATCTGTCCTAGCCACACAAACTCGTGAGGTCGTACCATGCATAAAGACAAACACTCCAACTGTGATTATTCGCCCAGAAAGAGAAAGAATTGAAGAGATTGTCCAACTTTACGTAGTACATTTATTCTTGATACTTCTCTTTCACCGCTAATTTTCTCTGTTGCCTCTGTAAAGGGATGATTCATACTTTAAAGGAAAGGATGAATGAAACTGAACCACACACAAAATAGAAGTGTTTCACACTTTCCCCTGCTGGATGGAATTTAATTAATTACACACTGATATATGCATAAAAAGTAGGTGATAAGCTCAGTAGTCTTGACATTGATAACGATAGATATATGCATTGAGTAATATTCCTATATTCCTATATCCTAGTGTGCTTCGGTTTCTTGAGTAGTTCTAACTTGTAATCACATAAAACTATTCATTATATTGAAAACTTAGTTTTATTCCTGAAAATTATAAGCATAGAAATGTTTTTACAAATTAGTCTTTCCGAAATATATTTGTGTAAGTTACTCTTTCAAATATTTTAGGAGGAGAGTTAGTAACACATTCTTTAACACACTCCTTGTAACACATCTTCTTTTGTTAGTTGAAATTTATTTAAAGTTACAAAATTAGGAGAGAGAATCATTTAGTGACAAGTGAGACCACATAATTTGTTATTTTCAATAAATTTTAATCAATCATGTAAAGTGTGTTAAATAGTGTGTTGTTAACATTTCTCATACTTTAGATATTGTTAGATTGAGACTAATTTTCTTGAAAATTTCATTTTAGAATTCAAGTATACTAATTCTAATAACTAGGGGTATTTATGGATTGAGTTTGGTTGAGTTTAAGCAAATACAACTCAATTCGTTATTGAATGAGTTGAGTTGTATTGTGTTAATTGCGTCACCATTTTAAAAAATATTTTTTAAAAGAATAAATTGAATGTTTAGAACTTTTTTTTTGTATTTTTTTAGGATATTTTTAAAAAAATAGAATATATCATTGTTGTAGTATAAAAATAAATAATAAATTATTAGCTCTGTGAAGAATCAATTCCCAAAACTCATAACACACACATCTATAAGCATACATTACTACTACATTAGTAGGATGATTACCACATATAAAAATAATTCATTGGCGTAAATCTTAAAAACTCATGTGTTAGTCTTTGACATAATATCTTTTTATAGTAATCACTAACATGTTTAAAATATATTATTGTTATAACTTCAAAAACATGTTTATTCAATCAACAATAAATTTTAAAATTATTATAAATTAAACTATTAAATACATTTTTTAATTTAAAATAATAAATAATAATATACTATAATTATCAGGTTGAGTTAAGTTAAGTCTTGGGTTCAACTTACTAAACTCGTTACTCAACCAGTAGGAGATTGAATTTGATTGAGTTAGATTGAATTTCACTCGATCTAAAAAAACTCAACCCAATCATTTTGAGTTAAATTAAGTTATCGAATCATACAACCTAATAAACACCTATAACTTAACAAAATAGGTGTTTAATAATTTATTATATGCTTGTTAGAAATCTTTTTTATGGGTCTCTGCTCTGCTAATAGATTGAGCATTTTTCATACTATTGAGTGTGTGGGTCTACGGATACCAAATTATTGCTTAACCAATAGTCAATCTATATCAATACTCAAAGATGATTATGTCAGATAAAGGATAGACGTGGTTTATGAAAAAAAAAAATATTAGTATCAACGCATACATACATATACGTACATAAAGAGTATTTTCAGGACATTAATATAAAAGTTTGGATCGTCACTGCCAGTAGTACTGGAATTGTTATCAATACCCCATGCTGATGAGGCTTAAAGCTGTAAAGACTTATATTAGGTTTTGGTTTCTAATATGCCTCAAACTAGTGTTGGCTATGTTTGTATTTGTTTATCTTGGTCTAGATTAGCTTTTACGTGTGTGAGAAATTTTGGTAATGTCATAATGCTTGAAGTGATTATCAAAATTATAAAATCATAATAGGATAAAGTGATAAGATGACTTTCTAAACTATTAATTAAAACTAACCTAGCTCATAATAATAAATTAAAAAATCAAATAAATCATTACTTTACTCATGTCTAGAATAATGGTTTTAAGCAATTGAAATTATAATTTTTTTATAGAAAAGCTTTATTTGTTTGGATGTTAATTTTTTTAATGAAAAGGATTTATATTAAAGATTTCTTTCCATCTTTTCTTCACATGTACATTTGTTACTAAATTAATTTTATAACTTTGACACTAGTAATAAATTAAATATTCATAAAAAAAATAATTTGTTAATTAACTTGAAATGTAATTGATTATGTCGCTTTGATGGGATTTAAACAAAAAATAAAAGTATATTTACTCTTTTAAATAATGTTATAAAAATAGGTCTCATCATCACATGATTGAAGCAATATGCTAATAAATTAGTTTTAAAATAGATTGATCATGGGTAATAAGAATTGAACCACTTACTTGGTATATGATAAAAATTATAAAATACATATTATAATACCTGATCAATCTATACTCCAAAAAAATATCTTTAAGTTTAATTTTGCATAAATTAATAATCAAAGAAATTTTTATAAAAAATAATTAATAATTAGTAAATTTATAATTTTAATAATTAGACATGAATATTTATTTTGAGTACGAAACTTTACTAAAATAAAATAAACTTTATATTTTTTATCCATAATTTATAAATTAATTATTATGATTAAATGATAATCTATTAAATAATATTTAATTCTTTATTTTGATTCTTTAGTGTGTTATTTTTGTTATATTTTTCATAAGAATTTTTGTTTTAAAAAAGTTGGGGTCAAATCTATTCAACTAAATTGATATTAGCTCAATTAGGCTATGGTGATTGATTCAACAGGATTGATTGTGTTTCCGGTTTGATTAGCGACTCAAATTGATTGAACCATTAGTTCAATTATATTGACGGGTCTGAATCCATTTTCCTAATTATAAACTCTAATCAATTAGACTAATCAAATAATGAAAATTATATTTTTAGATTATTTTTAAAAAAAAAATGAATGAGGTAAGAGTGTCTCAAATGAGAGACTTAGGGAAGGTGGGAGTGGGAGTGGAAATGACGTTTATTTGCTTGGGAGGAAGAGTTGGTGGCAGGACCATAGAGAAGTCTAAAAGGAATTGAACTTTGTCGATATTCGGGATATATGGATGTAGGAAACAGAAAGGTTTGAACGGTATTCATTGTCATCCATATACAGAATTTTGTATATTAATAAGGTAAATTATTTTTTTATAAGTAATATTGAGGAGATGATTTACATATATTAATTGATGGAGTGAGAAATAATTAAGGGAAAAATAAAAAGATGATAAGTTTAAAAAAGTTAATGTTAATTTTAAAATTAATAAAAAACAATTAACACATTTAACGTTATTAAATAAATTAACCAATTTTCGTAAAGAGTGTAAATTAGTTAGAGTTAAATTTAATCTTAGGAATCAAAGGATTATCATGAGTAGCCCTAAATAATTTTAAGAATACATGGTTTGATATATATCACATATAGTGATATAGTTCTTTTAACTCATTTCTTAGTGTTAATCATTGTCGAGGGTTAATTACTCGTTCAAGTAGATGGTTTTTACTTTGTGTGAGTGTTGTTTTAGAAGTTAATTAATTTCTATAGGGTTTAGGTGATTTTCTTTGGTCATGAAAATAGTGATGATCTTGTTTTGGAAAAGAAGATTCATTTTAGTGGAAAAACTCAACGGACTGGAATTGACTGGGAATTAGATGTGGATCACTAATTCAAGCAGTATAAACATTCCTTGTATTCTTGTATTTCTCTCTCACTCAATCTCGACACTCTCTTTCTTGAACTTTGCATCGTGGCATATAGAAACTACCGTTAGGAATGCATGATTATTACTACTATGAAACAAATGAATTAATAAACTTGTAATAAACATTTTCGAATCAGATTTTGACTAAAGACTCTTCACGAAAACTCTTCTTTTTATAATGAACCTTTTGGTTTCCTAAAATATAATTATTTTTTTTAACTTTTGGTCTTTTAAAGTTTTTTTTTTTAATTTGGTCCCTTAAATATTTTTTGAATGACTTTAATTCCTTGAGATGTTAGCAATTCAATGACTTATGATGTCATTAAGGAGTTTGACAAGATAGTTTAGTGTAATTCTTGAAACAGCAAAGGCAAAAGCTCTAGTGGGGGCTCTTGTAGTAGTTCTATACCAGTCACCATGGCTCAAGCTCTTTGGCAAGATAATCTGCTAAAGAATTGGGCTCGTGGAAAACATGGAGGAATTGGATTTCCTAGGGGCGGTGTATTAATTGGGAGATTAGGATATGATTGTGTCCATATGAAGGGATTGAGTGGCTTTAAGAGAGTCAATGATCTTCCTCCAATTTGTAGACCTCAAAAGATGGCCATCAATTCGGCCTGAAGGATAGATCCTATCCCTTCCTTGCAGAGAACCCTCTCACCCAGGCTCTGTCTGTTGATCTCATAGCACCCTATATGTCATTGCACAATCAACAATCAACCTGATGAGCAAGAGAATCTTCCCAAGTGCCAATATAGGACTTTCCCTTTGGATTCTTAATGCCGTATTAAGTCATGGACTCCAAAACTCATTTAATTAACATTATTGTTTGATAAAATGTTTTAAACCAAATAAAAAAAAATCAAAGACCAAATTAAAAAAATATATATTTAAGACCCAAAATATTATTTAAGCTTATTTACAATAATCACACATATTTTATACTCAAATGTTAAACAATGTTTCTTTATTGGTCAAAATTATATAAAGGATAAACAATGTATTGACAAATGTTAATGAATAATAGTTATTGATCATAACTATATAATTGTAGTGATAAATGTTAATTTTAATACAAAAATAAATAAATTATGGAAGTCAAGGTCTTGTCAAACTCTAAAATAGCTCTGTCTTTCAAAGTATATTAGAGTATCTTCAATGGAAGATAAATAACTCTGTCTAATTTTAAACATTCTAACATTGTAGAGATTATATTAAAATAATATTTTTACAATTAAGCAAATTTTATCGAAGATGTTCTCAGTGAGAGAGAAAGCATGTAATTAACTTTTTTATTATAGTATTCATATAAATATATAAATACACAAATATTTTATACAATATTAATTATTATGTTATTAAATATAAAGGTAATTATGGATGTTCCTCCTCAAGTCTATTGTAATTACATATGCATTTTCACTTCTTTTTTTTTTAAGTTACACAAACCTCTCTTACTTTTACAAGTTCATTGCAGTTGTATCACTCATTTCGAAACTACACAAAACTTCATTTATTTTTGCATTATTATATTTTATTCCATGTGACATGATATGAATTGTTTTTTTAAGCTTCGTAATAATGTGAAAATGGAGGTGAAAGGGTGTTTGTTGTAAAGTTTAAAAAATATAGGAGGTGTCTGTATAATATCATACAACACTTAGAGAGTACATTATAATATTAGATAAAACTTAAGGGGTACATGTATAATAAATTTATGTACAATATTACATTGTTTTGAAAGAAGAGATACAACTATAATAGGTACGTAAAAGTAAGGAGAGTCCATGTACCGCAAAAAAAAAAGAGATGATGTATATGTAATTACCTCTTAAATATAATACGTTTATTGAATTTAATATTGTAAAGATGATGCATGTATACATTTTAGGTGTTATATTAAAAAATTATTAAAAAAAAAGTAATTATAACCAAATTTAATGTGTAATTTTATTAAACATATATATTTTTTGAAGATTAATTGACAAAAATATGTTAAAATATAAAACTTTAAAGTGTGTCCACAAAGTGCATGTGTGCTTTTAAACAAATATGATTTTTAAAATATTAATAAGTAAAGTCTAACAAATTTATCATATAGAAATGATTATGATTGAATATTAGTGTAATGTCGCACATAATAGTCATTTTTTAGAGTTCCTACATCTATGTCTATTATTTTATTTAAATTTGGTTTAAAATTGTAAGTATAATTTATTATAAGTTAATTATAAATCCTGCTATTATAATTAATTATAAGTTGAATTTTTCATTTTATTGAGAGTCATGATAACAAAAACATGAAAATAATATTTAATTTTTTTATTTTAATAATTATATAAATATACTAATATTTTTCTTTTATAGAATTAATATATTTATTAACCATAATATATTTTCTGAATTTAATAAATATAATGATAATAAGAAGATTATTAAATATTTTTATAAACATATAAATCTTTAATTGAGTTATTTATACATAAATTAATATATATATATATATATATATATATATAATTTATTTCGTCGTACCTTTGTTAAAATTTGTACAATTAAGATGGTAAATTTTGTCAAAAAAATTATGATAAAATTAACAATTAAAATTATGAAAGTTTAGTGGTAAAATATGTAATTAAAGAAGTGTTTTATTAGCTTTAATTAAAGAAGTTGAATATTTAAAAACCTTTGAAGAAAGATAAAATTTTCAGAAAAAATTAATAATAAAATTTGAAAAATTATAAAATTTTAATCATAAAATCCCATTAAACGTGTTTATTTTTCAGCGTTGAATGGAAGTTCAATTAAAATAAGAGATTAATTGGTATACACTGTCAGTGTAAATATTTTTACACTGACACCCAATCACAACTCTTCGTTCATGGTAAATTTGTTGACTTTACTCATTATTACTTTTAAAGTCATATAAATGAAAAAAATTATGCTTGAATGTCAGTGTAAAAATCTTTTACACTGACAATGTATACCAATTAAACTCTTAAAAGAATATGGGTAAACAGTCTATAAAATGATATTTCTATAAATAATATTATTGGACATTTATTCGCATGAAATATGTTTCGTATAATTTTTTCATTTCTTAAAATAATTTTAAAATTAATTTTAATTTGTTGAATATTAAAAAAAATTAAGTGAGAAACTAGGAATTAGAGGTGAAAGTTATGTCAAATTTAGGCAAACTCAAAATCTAATTCAATCATAAAACAAAGTTGGAGGCTTTTATTCCATTAAACTCAATTCAACTGTTTATTGAACGAGCTTAGTTAAGTTGAGTTAATTGGGTCACGGTTTTAAAAAGTATGTTTTAATTTTTTTTAAATAATTAAATTTTATAATATTGTTTTATTAGTTTTTTTAGGATACTTTTTTAGAAAATAGACTACATCATTCTTATAACATAAAAATAAACAATAAATTATAGTTACAAATTATATATAGAAACTAAAATAAATTTAAATTAATATACAACTAATAAGTATAATTTGTCTAAGCGAAATTATACAAATAAGTACAAATTACACAATTTGTCCAAACTAATAAAAACAATATCAAAAGAAACATATAATAACAAAACACATAATTTTAAATAATAATAATAATAATATATAATAATTTAATATTATAGTCGGGTTGAGTTTCAAGTTTAACTTACTGAATCTGTCACCCAACTTGTAATGAAATGGATTTAACTGACTTAAATCGGATTTCACTCAATTACAAAAAAATTCAACCCAATTTAAAAAATATCTATGGGTACTCGAAGATACCCACAGTATTAAAAAAACCAACGGGAATATTTACAACAGGTACCCGGTGAGTTTTTTAGTAGGTAGAAGGTGATAGGTTTTGTGGCGGGTCAGGTAACGGATAACCATTACCATTCCCTGTGCCCCGTCCTAATGCGTTGTCATTCCTACTACTTGTCACCCTCTAAAAATCCACTGATTACCAATTATAAAAAAACGGTGGGTATCCATGAGTATCGTGGATATTTAAAAAAATATTTTTAGAAAAAAAGATTCTTTTTTATAAGTTTTATAAAGTAAATCTTTATTTGTTGAAAAATTTATAAATAAAATTATTATATTTTCTATAAGATTAATTAGATATAAAATAGATTATATATATATATATATATATATATATATATATATATATATACACGTGCAAACTATGTAATACAAATAGAATCTTTATTTTATATTATTGATATTTTTACAATAAATAATTTTATTAATTTGAAAGTTTTCATAAAAAAATAAAATTGATATCAATGAAATTTGACAATTAATATTTTAATTTTATTTATTTCAAAAAACTATTATTTTCTTCAACTTAAATATATATAGTATTTTAGTTTAGCAGGTACTCATAGGTAAAAATACTATGATACTCAAATTTGTGGTTGTTAAGAAGCGGGTAAAAAAAAAGAATACTCATAGGTGACATATACTCATTTATACTATTCATATCGGTATTTTGACAGGTTTTATTTGCTGATACGATTTTTTTGTCATCCCTAATTAAAACATGTCTTTCTTCACTAGTCTAAGAATAATTTATTGCAAGTTATTAAACTTAAACTATGGTAGAACATTAAGGTATCTATAAAGGAAGCAACCTATTTAGATTGTTTAATAGATTGGAAATTGTGTCAGTGGTCTTTGTCAGCATTAAGAAATTAAAACACAAATTCACTCTCATGATAAGAAACTTTAAGAAATTCAATTTTTTATATATATTTTTTTCCACTTATTAATTGTGTTAAGTGGTATATATATATATATATATATATATATATATATATATATATATTATTTAATGAATGGAAAACAATTGTTATTTCCTTAACAATCCAATCTTATATGATGTAGATATTCACTAAATAATAAGTAATCGTTGCTTCGTTAGAAGAGACTTAAAAGAAATTTCATTATTTATAAAATTACATAAATTCATTTTTGTTGATTCTATCCTTAAATTATCCTTCATAAATATTTGAAAAATATTACATTGATATTTCTTATATGATACACGAATATTTCTTAAATATTTTAAAAAATATTATCTAACATCCTTCTACGAATAAGAGGAAATCAATTAAGTTAAAATTTATCAGGTTGAGCCCCAACTTTAATTAAAAATATATGGCTCGAATCTAACCATTTTACATGTTAAAAGGCATTTCCCTTGTCCTAACCTATATAAATAGTCTTGTCTAGCCTACAAGAATGTTTAAGGGTCTATTTATGATATTAAGATTAAGATGTGAAAATAGTTACTTTTAAGCTTTATAAGCATATATTTTTAATGTCTATAATAACATTCATAAAAACTAAATAAAAATATATTTTATAATAAAATCTTTGAATAAGACATATATTTTTATTTTTATTTATAAAGGTATAAATGTAAAAAAACATAAATTTTTCTTAATAAAATAAATTTAAATTTTGTTAGTAAATATGCAGTTACGTGGTTAACTTTAAAAGATAAATAAATATAAAATTTTAAAAAATTGTAACAAATCTATAATAATAATAATAATAATAATAATAATAATAATAATAATAATATCAATAACAAATGTTTATTTAAATAGATTGGTTTGATAGGTACAAATGACTATTTGAATAACTTATAACTCGACCTATTTAACTAAACATGCTTTAATAATAATTAAAATATATTACAAATATAATTAAATACTATAAATATCATCAACTGTTTTTTTATCCAAATTAAAATATTCACACATCAACTTCAATAAAATTTAACAAGCACATAAGTACTCTAAGGGTGAAAGCTATTAAATTTAATAATAATAATAATTTTTAATATATAAATTCATATAAAATATTTATATTTGTTTATAAACTTCAATAAATATATTTTATTTATATTACCAAAAAAATTAATTATATATTATAATTAAAAGTACAATAATCAAACCATATAAAAAACATATTTGGAAATAAAAATATTTTTTTATCAGCGTAATGCATTTTTTTATATTTTTAATAAGCATTTTATGTGAATTATTATAAATTAATGTAAATTTAAATATATAATTAAAAATCAATTTTTAAGTATTGCTATTCATAAAATACCTTATTTTTAATTATTATAATTCATGAAATATATGTCACAATAAGCAAATTAGAAAAAACAAATGTAGAATTGAACATAAATAATTAAATAGATATTTACCTGAAAAAATTATGTTCGTGTTTTTAGATTAATATTTGTAATTATTAATAACGAAATATAATATATAGTTATCTTTAATAATATCATTAAATTAGCTTTTTTTTTTATAAATATAATATAGACTTAATTTTTTGAATTTAATTAGTATGCACTTACAGTGTAAAAAAAATTTTACATTTACGTTTAATCATAACTCTTCATTCATTGTATTACTTTTTAATTATTAATTAATAAAATCAATAAACTTACTATAAACAAAATATTGTGATTGATTGAATATGAGTATAAAACTTATCATAAATTTAATTTGTTACACATGTATACTAATTAAACTATGATCTTTTGCATTGAAATTTCAAAATTACAGTTGTTAGGGAATAAGTTTGACCAACTTTGATGAACTTAAATGACAAAAAAAAAATATTTTTCCTTTTTAGGAATAAAAAATAGAATTTAGTCAAATTTCAAGAATAAAAAATTTAACTAAACCTCTAATTTCATAAACAAAAAGTAAATTTATTAAATGTATAAATTTTTATGAATTTATATATTAAAAATTATTATTATTATTATTATTACATTTAATAGTTTTCCTTCTCTATAGCCTCTATGTGTGTGTACATACAGAAAGAGACTTTAATTGGTATACATTGTTATTTATGTGATATTTAAAGTAATAATTAGTAAAGTCAACAAACTTACATAATTGTGACTAAATGTCAGTGTAAAAATTATTTTTTATTGGATAAAAATTTATCTTCATAGTTGTAGTAAAATAAATTGACTTTGAATATTAATGATAGATTTGTTAAATTTTATTAATAAGGATCATGAGATGTATTCAATGGTACATAGAATTGCGAGAAGGAATTATAAAAAAAATTTGTTGGAAAGAATCTAAATGATCTACTTTTTCCATCTATTTACCGACTCTTACTAGTATATTCAACCATGTAAGTAATTTGACCTGCAAAATCAGTAATTTGCAAAATTCACAGGAAGTGTAATTTAAAGCATGAAACTCGTATTTTTTAAATGGATTTGTTAGATTTAAACTCGTATCTAACCGGTAAAATTAACAAATATGGTGGATGTATTTGCATTAAAAAATTGAAAATAATTTTTTTTTTTTAAAGAAAAGTAAAAATTTGACTAAAAATTATCGGAGTTTGCCTACGAAATTCTCTTATTGCGAATCGCAATCTCATTTGTTCATTTTTTTACCTAATTTATTTATTTACTTCACTATTCTCTCCATGGTTTAGCTTCTCTGACATAATCAATTTTCTTTATCAATATCAATAATTAAAATCCCAATACGAGATTGCGTGGATAAAAATTACGTAAGAAATAACCTTTTCTCCTGTTGAATTCTCTCTATCATGTTCCTTTATAAATATGTCAAATTAACAAACACGCGTGGAGAAATAAGAAAAAGCAAAGAAAAAAAATAAACGCATAAAATAATCAAATTCTTTTCTCAATTAAATTGTTGAGGGGATCTTGAGTCACTGATTGGTCGGTTGGGAGGTTTTTTAATTTAATATGAATTTTGAATTTTTTAAAAAAATCAAAATTATAAGAAAATTTAAGTACAATTCACGAAATTTACAGAATTTGTGAGTTAAGTTCGAGCGCTTAAGACTTAACTTGTTTAGAAGAATAAATTTTATGATTTTAACTATTAGTTTGTGTTATATTTAGTGATTTTTTTATTATAAATTATAATATTTTAAATTTTTAATAATAAAAATATGTAGTATTTGAAATTATTATAAATAATAATATAATTTTTAATATAATATTATAGTTTAATTGATTTAAAAAATGTTATAATTTTTTAAATATATATATGTATGCGGCGGTTTCACATAGGGATTTGTTAAATCTGCAAATTTGGAAGGCTGCAAATACGCTCTAAAAAAAATTCACTTATTTTGATAAATCGAATTTATCCAACTCATTTATAATACATATCTTGCAAATTAAATTTAAACGAGACAAGATTAATTCGTTTATCCATTCCTAATCTCGAGTTCAAATCCTGATTTGCGTTAAATAGTTGAAAATACATGCGTTTTATATTAAAAAGAAGAGTCTGCCTTGTGCAATATCACACTGCTTTTGAACAAAAAGCAAAAAATAAGAACCAAAATGTAAAAAATAAACTTTGTGCATACTTTTTGGACCCTTGTTTGTGAATGCTTCCTCAATATAGCTTCATCATTCCAAGACTCTCCATATAAACCCCATCAAAGTTTCCCCACCATCATCCACAGGAATCTCTCTTTACATCACTTCTCAACTCAAAAACCCAAATTTTCCAAACCTCTCATCAACCTTTGAACCATGAAATAATAAAACTCTTACTCTCTCTTACCATTCTCTCTGTCTCTTTCCACACATAGAAGAATGCACCACCCTTTTGTCCTGCAATTTATTCACATCTGACAGGCCTTAATTCCTCTGTGAGTGATGATGGGTATGATGCTCACTCACCCCCACTTTCACAATTCCCGTGTCACATTATTCCCCTCCACCTGCTCCTTTCACCATTAATTTTTATCAAACCAAAGAGCCTCATCCCTCTGCTCCTTCTTCTTAAGGATATGATGTGACTATGACCCTTTAGTTTAAATTCACCTAATAGTCTCCTTAGTTTTGTACCATATCCACCAAAAAAGTTTCCATTAGGCCATGGAGGGTGAGAAGCTTCATGAGGCTTCTAGCATGACACTTGTGTTCCAAAAAGAAAGACTTTCATGCTCCTCTGAGCTTATTCAGTCTTTTTGGCTTCAAAACTCTGATCCTTCTTTCCAAGGTGATTTGCTAACATCATGTTTTTTGTTTCTTACATCATGCTTGGATTGCAATTAGGATATTGTTCAATCTAGAATTTGGTTTTCCAATACACAAATTAAAAGCATCACAGCTATTGCTTTGAGTTAAAAGCTAATTGATTGAATTGAAGTTGAATCCAGCTCCAATTCAAACATGCTACTAATCTTCTTGGGGTTGCTATTTTCTTTTGTATTTCAAAACCTTTTTCATCAATTTGAAATTTACTAGAACAGAGAAAGAAAAAAATAAGTGTTTTTTAACAAAAATCAGAAGTGGGTTTCTTATAGATTTTAATTACCTTGTCATGATGAAATTTCCCATGCAAAACCAAGGGAAACATTATTGTTTTCACAGCAAATCGTTTTATGTTTGAATTTTCAAGTCTAGAATAACTATCAACGTATGGTGTTTTTTTTTTATTTTTTATTTACTAATATTTGTTATTAGTTTTCTTGATGAAAATTATATTCAAACTCAGTATTTTTCCTTTTGTAGCTTATCTTTACCTGCTAAGACAAGTTTATAACTCCATTAATGTTTGGTGCCTTGAATTCAGGATCAAAATCTGTTGTTAATGGTGTGAATGTGACGCATAGGCCCTTGTTTCAAGGGCTTGAGAAAGAGAACGTCGGTGAAGATGCTGATTTTGAGGTGTGCCTCCATCAACCAGGTAAGAAAAGGAGGCTCACAAGCGACCAAGTGCAGTTCCTTGAAAGCAACTTCGAGGTAGAAAACAAACTTGAACCTGAAAGAAAGATCCAACTTGCAAAGGACCTTGGCATGCAACCAAGGCAAGTTGCCATATGGTTCCAAAACCGTAGGGCAAGGTTTAAGACCAAACAGCTTGAAAAAGACTATGGCGTGTTGAAAGCTAGCTATGACATACTCAAAAGGGACTATGACAATCTCCTAGAAGAGAATAACAAGCTAAAGGAAGAGGTAACAATTGTAGAACATTAAAGTTGAGAAAATAGATGATATTTTTACAGTGTTAAAGCTCACACTTTACCATTTATGATAAAAATTTGTTGACTTTTATAATAATATCTTAAAAGTTGTGGCTGTGATTGAATGCAGTTTTACAGTGATAGTGTAAGACCTTTAAACCCTTTAAATTAACAATACTAAATAAAGATTTCAATATGGTTGGTTCTAGAAGTTGAACGTGTTCAAGACATCATTTAAGCATTTTGAGAGTTTTTAACAATAGCAACACTAACTTGAAACATCTTTCTCTGCTCCCCTTTTTTTTTTTATACTACTATGACTTCTTTAGGAAATTGTCATCATAGAGATAGAGGTACATACCAAATTGGTCCATAAAATTACAAATACAGTTAAAATTTGATCCTTTAAATTATCAATCAATTGATTTGAAATTATAAATTTACAAAATTAATGCCTGAGATAACCACCATTTGATAAGTTCAAATCTTAAATTGGCTAAATTTTTAATTTCAATACTAATTTATCCGAGTTAACATACTTTCAACTCAATCCAACACTAATGTTTTCTCAATTTGTACATAAGAATGTATGATTTTTCCATTCAACATGATTTCAATGGATATGGAAACACACCCTTATGGCTGAATTGGTACAATTTCCTTGTTACAGGTTAATTCTCTGAAGAGCAGGTTGATTCCTATACAGAAAGAGGAAGAGAATTTGGATGATGATACAAGCTGTGGTGCTGACAACTCACAGAATAAAGAGCAGAAGGATTTAAGAAAAAACACAACAGGTTCTGAAAATGGATCCAAAGGGCTACTTCCTGTTATGGTAACAAGCAAACAGGAAGATGCTAACTCAGCTAAAAGTGATGTGGTTGATTCTGAGAGTCCACATTTCGCTGAGGGAAACCAATCCTCAGTAATGGACCCTGCAGATTCTTCCCATGCTTTGGAACCGGACCACTCAGATTTCTCACAAGATGAGGAAGACATCCTCAGCCAGAACATCTTGACCATGCCCTTTTTCTTACCAAAGGCTGAAGATGTCTGCTACCATGAACCACCTGAAAATTGTTGCAGTTTCCGGTTCCCAGTTGAAGATCAAACCTTCTGTTTTTGGTCTTATTGAGTTACTACTTACTACTACCAAGGGAATGTTAAGTTTGCAGTTGTAATTTTGTACTAGAATGTTCTTGTAATTGAAGTTAATCTGCATAATAATCTGCCTAGTAAAGAGGAAAATGTTGACTAGTGTTTTAATTTTTAACAACACTGCTTAAGGAATAAATAGGGAAGATTATGTTTTGGGTTATTAATTTTATCTCTAAAAAGTTATTCATATTAAGTTGATCCTTTTAAAATGTATATGTAATTTTATTTTATTTTTGTAACATTGTTAAACAGTAAGTTGAAATGGCTGAAGAACATAACCATTTCAACTATAACAAGCTAAAATGATTTAGTTGAAATCACAAAATCTATTTCTTAATTTAGCATAATCTAATTGTTTAGTGGCAATAAATTTAGATACCTAAATATTAGAAGTTACTATAATTTGATTTTATTAATCTTTATATAAAAAATTATTTCATTTTTTTAACTTAAAGTAGGAATAACATTTTAAGATTATTAACGTTGTGTATAATTTTTTGAAGTTTTAAAAATAGATAAAATTATTATTTTATATATTAATTCTGTTAGATTACTGTTTAAGTTAGAAATAAACAGTTATTATTAAAATAAGATATATTAATTCAAAATTTTAAAAAAAGATAAATTTATTATTTTATATATTTATGGAAACAAAAACATAATTTATCCAAAAAGATGTGTGGCACAAAATTACGTATTCAGTTTGAATAGCGATGACCTATAATATTCAATAAAAAATTCTGTCTTTCTTTTTAGATTCTTGGTTAATCATATCATTTAAATAAAATCAAGAAATTATTAGTATTACCTCATTCTATTCACGATAAACAAGAAATTAATTTTTGGTAATAACGCAGGTTTGAGAGACGGATCTCAAAATTCCAATGGGCACACTTCTTAGCACTGGGCAGAACAAGATACAAGAAAAAAAAATGACTATAGTTTTGATATCAGTGATAGTGTCACAATTCACAACAACAAAAAATTTAGTAAAATAATTAGGTGGCACCGTAACAAGCACCTTTATTTTCCCGGGGTGTGTTTGAATTCTTCAAAACCTTAACCTTTACTTTCTCCTAAAAAAACTATGGTATATATTGATCTCAAATATAAATATACATTTTGATTATTTTTATCTTATTTAGTAATATTGTTTTAAAATATTTTTCATTTAATATGGTGTTTAACTTATATCAACTTCTAGTAATGGTATTTTAAGGAAAAAAGTCATTTTTAATTAGAATTGACAATAATGTGCAAAAATAAAATTATATGAAGATTCAACAAAATTTAATATAAAAGGAACAGAAAAGAGTATTAGAGATGCTATTTTACCCCAAGTTATTGTTAGGAGGTCTCTAGACATATTCCATCTAACACAGGCAAATTACAATATCCTTTAAGTTTTTATTAAATTATATGTAAGGTCGTTTTTAATGGAAGTTTCGAATCTATTTAAGAGGAAAAATGGTTTATAAACCAGAAATTTGCATTAGGGGAAATCTACATAGAAGAGTAAGACCCTCTTTGATTGTGAGAAAAAAGAGTGAAAAGTCAAAAATTATTTGCGTAGGAAAATTAGTGAAAAATCATTATTTTCTAGTTGGGTGATAAAGAAAAAGAAAATAGTGAAAAGTCATTATGTCTTTAATTTTTTACTTTTCACTCAAAATAGGTATAAATAAAAAAATAAAATTTAAATAGAATTGATCATTCTAAAATTACTTTTTGAACAAATGTGTAAAATATCAGGAAAAAAGAAAATATTATTTTTTATTAATTAAGTTATTATTTTAAATTTTATGTATTAGAAAATAATTACTTTATTAAATTATTTTTGCATTTGTTTAAAAAAGTACCTAATAATGCAAGAGTTTGAATATATACTTATTATATGAATTTAATTTTTATATATTGTAGTACTTAATTATAATTTTTTTCTTGGTATGAAGTTTTTTATAATATTATTATATTGTTAATTTTAATTAATTATAAAATTATAAATATATAGTTAGATTTATCAAACAAGGTGAAAAAAACTATTTTGTTCATAAAAAATAATTAATAAATATATGGATACTTTTGTAATTTTAATAATTTTAATTTATAACTTATTTCCTTTTCACATAGCTTTTTACTCAAATCAACAACATTAATTTCCACTTTATTTCATTTCTAATGCGTTCCTTAATAATATTAAAATGTACCATTTTTTTTCCATTCATCATCATCAATTATAATAAAGTCATAATAAAAAAAATATAAACATATAAATTTGTTGAAATTCTTTAGGGTATATTACTATGTTGGAACAAATTTATATATATGTTTCTTAATGATAACATAATTATGCAGATCACCAAAATACTCTAGGAATCACAAAAATTAATTTTAAAAACTCATTGAAGTGTCTTAATTACATTTTTTTTTTTACATTAATCTACTTGAAGGTTAAAAATATTACACTGAACCTTTTCTTCCATCGCTAAGCCTTTTCCATTAGTGGTTTTTGCTGTTTACTAGTTAATGACATGACACCATGCTAGACTAAAAGTTACACAATAAAAGTTTCTAGTCCCAATCTTCTTGTGTTGAGTTGAATAGTAAAAATAATGATAATATGAATGAATAATACAGTATTAATATATACTTCACAATTACATATGTGAAAAGACTATTTCAGGTGCACCCATCTAATAACCTAAAGCTTTCTCGCACCAAACTTTGTTAGCACGTTCTCTATTAGATACCTAATATTTCTTGGTTAGTCTAATGGTGCATGAAACTATACATTCTTAGATTCAAATCTTACTCTTTATGTTGGGAAGACTTTTGGAGCCTAGTCTACAATAAGTCGAATTTTCAAAATTGATGGGACAGGGGTGAACCAATAAACAAATTGAGCATATTTACAAAATCAATGTGATCACATTGAAAATGTTGACGATAACTGCAAGTCTCTGAGCCTATTTGTATGAAGATTGAAGAGAAATGAAAAAGCCTGAGAAGTTACACCCTCAAGATGAGTGAAATTAAATTGATTGATAGACAAAGGTATGTGAAAGATCTGACTTAGAAACCCAATTGGCCAAAACGCATCACACGCAAAAACATGATCCTGCTGTGTACAATACAAGTCAAGATCTGGTGTAGTTCACTTATACAAATTTTTACACACTCTCAACTACCTCAACTAACAAATTTACATGATATTTCTTGAACAATGAGACAAGAAAGAGACACCAATTGAAGTTGTAAAATTTCTATCCTTAAGTAATGTACCATTCTAGTATTTAATAATAGGTAAAAAAGTGTAAAATAAATAAAAAAAATTAAATATAATTTTAATTGTGATTATTAAATTTTTTTATAGATTATTAATGTGTTAGTTTTTGTTATTGGAGAGACTCGAATTCATTGTCTCCACATCTCTTCACTTTACACTAGATTAACCTTATAACTCCAACTATGAATACTAAATTATTTGGGAAAGTAAATTTTGTTGGAAAAATTCAATAGAATTAGTTCAATGCGAGAAAACTTTATTTATTTATATATATATATATATATATATATATATATGTATGTATGTGTGTGTGTGTGAGTTTTTATTAGAATTTATTTTGAAATTAAAGGTATAAGAAAATTTCATATAAAAAATAATAAAAAACTAAATATAGCTTTAATTTATTTATTTTTTCATTTTTCCTTTCACACTCTCTTTCTCTTCCTTGCATCTCTCTCTTCTATCTCAAACTTCTCTCCCTTGCATGTCGCATCCGGAGATGTCAGAATCCAAGGTGGTTTCTTCCATTGTTCCTGATTTTGAGAGTTGATCCTCATAGGTAAGTCTGATCTTAATTTCTCGGTTTTTTACCGTTTATTTCTAGCTCGATCGTTCCCTTTAAGAAGAGATTTCCTTGAAATCCTATTTCTTCTTAAGTTATTTCTTGGAATTTGGATTTTGTCAGATTTTGAGTGATTTCTACAATGTATTCTTTTCTATCCTCAAAATCAGTTTTTTCAGGAAGAAATAAGTAAGAATAGCTCTTTTTGTTGATTTTATTTTACGGAGCTATGATTTCATAGTGAGAAGTGGATTAATTGTGACTAATGGAACTTTTGATTATGATTTGAGCAATATGCAAAATTATGTATTGTGTGTGAATAGTGATTCATAATTTGGAATGGTAAAGTGTATGATTGAGCTATTTGAGATAATGAGTATTTTGATTGTGCTATTTAGATAGCGTATGTTTGAGCTATTTGAGATAGCGTATATGTTGATCGTATGTTTGAGCTATTTGAGATAACGTATATGTTGATTGTATTGTTGAGCTATTTGAGATAAAATATATCTAGATTCTATGAATGAGCTATTTGAAATAACGTGTATAATGATTGTATGATGAACTATTTGAGACAACGTATATGTCGATCATATGCATATCTGTATGA

**.qantho1.1b** **( 63,357 bp;CHR 4, 9041435-9104792)**
[truncated: 63,258 more chars]
