# Supplementary material for: Genetic and Environmental Regulation of Anthocyanin Biosynthesis in Winged Bean (Psophocarpus tetragonolobus L.)
Source: Research Square preprint supplement (doi:10.21203/rs.3.rs-7401144/v1), 2025-10-27
Supplement: Supplementary file 2 [file 8b60ebca4c00a1e9c8aa3f76.docx]

**Supplementary Table S2** Genomic locations of anthocyanin-associated QTLs in the winged bean genome.

| **S. No.** | **QTL** | **Marker** | **Chromosome No.** | **Start** | **End** |
| --- | --- | --- | --- | --- | --- |
|  | *qAntho1.1a* | 86339_105 | 4 | 7303863 | 7303963 |
| 90362_173 | 4 | 7502244 | 7502345 |
|  | *qAntho5.1* | 129210_17 | 7 | 37324470 | 37324354 |
| 74111_70 | 7 | 37523769 | 37523869 |
|  | *qAntho1.1b* | 49233_195 | 4 | 9041535 | 9041435 |
| 59413_160 | 4 | 9104792 | 9104692 |
