# Supplementary material for: Genetic and Environmental Regulation of Anthocyanin Biosynthesis in Winged Bean (Psophocarpus tetragonolobus L.)
Source: Research Square preprint supplement (doi:10.21203/rs.3.rs-7401144/v1), 2025-10-27
Supplement: Supplementary file 3 [file cb190a5705fd192c714362ba.docx]

**Supplementary Table S1** Anthocyanin QTLs and their flanking marker sequences.

| **S. No.** | **QTL** | **Marker** | **Sequence** |
| --- | --- | --- | --- |
|  | *qAntho1.1a* | 90362_173 | TAATCATAAATTGTTATAGTATATTAATAAAAAAAATACTATTTTATTAG[A/G]ATCAGTTCAACCAACTATTTAGTAACAGTTGAAACTAATGAACCATGAAC |
| 86339_105 | TTTCATTTGTCTAGTACATGAATAATTGACAAATATAAAAGTAAATGTAG[A/G]TATTTGTTTCCGCATGTGGTTTGCTGGTGTATTTGATTATCTAGAAACTC |
|  | *qAntho5.1* | 129210_17 | CTAATATTGTTTTTTT[C/A]TTTTCTATTAAGCAGTTCCTCCCAAACCATTCTTTTTTGGTTTATATGGGATTATAAATAGACATTGACAAACACTACTTGCACATTTAATTCTATCCAA |
| 74111_70 | ATGATTCATGATTTGTATTGGGGTCGTTACCTGTGGTAATTGAGCCATGT[G/A]TATTGAATTAGGGATATCTTAACAGTCTTTGTGATCCTGGTATTTTACAC |
|  | *qAntho1.1b* | 59413_160 | TTTATGTATGCTATTTTGTCAAATATTTAATAAAAATTAGTATCAACGGC[C/T]TTTTAAAAAAAAATTAAAATTGTTTTCTTCAAATCTCAGTTATGACATGT |
| 49233_195 | TGTTGGTTGTGTTCGGATTGAGCGTGAAGTTTGAAATGGTCTTCTTGGTC[C/T]GATGTGGCTTTGTCTCCAATGTTAAGGTACAGCGAGGGGTGACCTGTCAC |
