# Supplementary material for: Genetic and Environmental Regulation of Anthocyanin Biosynthesis in Winged Bean (Psophocarpus tetragonolobus L.)
Source: Research Square preprint supplement (doi:10.21203/rs.3.rs-7401144/v1), 2025-10-27
Supplement: Supplementary file 4 [file dc29122783068cb455824cf2.docx]

**Supplementary Table S4** Genes identified from three anthocyanin QTLs of winged bean.

| **S. No.** | **Gene ID** | **Chromosome** | **Genomic location** | | **Annotation** | **Function** | **Anthocyanin pathway** | **Reference** |
| --- | --- | --- | --- | --- | --- | --- | --- | --- |
| **Start** | **Stop** |
| ***qAnthol 1.1a*** | | | | | | | | |
| 1 | *PT04_g20705* | Chr 04 | 7307542 | 7308432 | Uncharacterised protein LOC108328268 | - | - |  |
| 2 | *PT04_g20706* | Chr 04 | 7310511 | 7312217 | Uncharacterised protein LOC120577489 | - | - |  |
| 3 | *PT04_g20707* | Chr 04 | 7312253 | 7312720 | Uncharacterized protein LOC109838612 | - | - |  |
| 4 | *PT04_g20708* | Chr 04 | 7324664 | 7325216 | SUN domain-containing protein 5 | Maintain nuclear shape and integrity by interacting with KASH proteins | - | Graumann et al., 2014 |
| 5 | *PT04_g20709* | Chr 04 | 7335650 | 7341557 | Poly(rC)-binding protein 4 | Essential for post-transcriptional regulation, mRNA stabilization, translation control, seed germination, stress responses, and plant growth | - | Yanatori et al., 2020 |
| 6 | *PT04_g20710* | Chr 04 | 7342718 | 7344512 | Hypothetical protein KK1_001697 |  | - |  |
| 7 | *PT04_g20711* | Chr 04 | 7346585 | 7350125 | Hypothetical protein QL285_047879 |  | - |  |
| 8 | *PT04_g20712* | Chr 04 | 7350193 | 7359326 | Hypothetical protein Ahy_B04g073608 isoform D |  | - |  |
| 9 | *PT04_g20713* | Chr 04 | 7367888 | 7369502 | Ribonuclease H protein | Ensure proper nucleic acid processing, replication, and RNA structure maintenance | - | Cerritelli & Crouch, 2009 |
| 10 | *PT04_g20714* | Chr 04 | 7372694 | 7386558 | Sister chromatid cohesion 1 protein 4 isoform B | Chromosome arm cohesion, pairing, and recombination | - | Cai et al., 2003 |
| 11 | *PT04_g20715* | Chr 04 | 7391098 | 7391658 | Uncharacterised protein LOC100527525 | - | - |  |
| 12 | *PT04_g20716* | Chr 04 | 7393165 | 7397909 | Hypothetical protein Patl1_23961 | - | - |  |
| 13 | *PT04_g20717* | Chr 04 | 7413785 | 7420474 | Chromatin assembly factor 1 subunit A | Chromatin assembly, homologous recombination, and ploidy regulation | - | Kirik et al., 2006 |
| 14 | *PT04_g20718* | Chr 04 | 7422954 | 7427508 | Putative metallophosphoesterase | Phosphate homeostasis and root development | - | Mehra & Giri, 2020 |
| 15 | *PT04_g20719* | Chr 04 | 7441711 | 7448063 | AP2 ethylene-responsive transcription factor BBM2 | Anthocyanin synthesis and cell proliferation in *Lycoris radiata* tissues | Yes | Wang et al., 2023 |
| 16 | *PT04_g20720* | Chr 04 | 7460953 | 7468624 | Phospholipase A (1) LCAT3 | Jasmonate synthesis and lipid metabolism | - | Richmond & Smith, 2011 |
| 17 | *PT04_g20721* | Chr 04 | 7479663 | 7485506 | Unknown |  | - |  |
| 18 | *PT04_g20722* | Chr 04 | 7486219 | 7490560 | Dehydrogenase/reductase SDR family member 7 | Fatty acid synthesis, and chlorophyll degradation | - | Zheng et al., 2022 |
| 19 | *PT04_g20723* | Chr 04 | 7491469 | 7492564 | Acyl carrier protein 2, mitochondrial-like | Type II fatty acid synthesis and mitochondrial protection against drought stress | - |  |
| 20 | *PT04_g20724* | Chr 04 | 7492607 | 7493268 | - |  | - |  |
| ***qAnthol 5.1*** | | | | | | | | |
| 21 | *PT07_g36943* | Chr 07 | 37324786 | 37327258 | Ethylene-responsive transcription factor WRI1 | Fatty acid biosynthesis and oil accumulation | - | Tang et al., 2019 |
| 22 | *PT07_g36944* | Chr 07 | 37333599 | 37336212 | Pectate lyase-like | Fruit softening and defense mechanisms | - | Marín‐Rodríguez et al., 2002 |
| 23 | *PT07_g36945* | Chr 07 | 37340954 | 37341821 |  |  | - |  |
| 24 | *PT07_g36946* | Chr 07 | 37345052 | 37347533 | Pectate lyase | Fruit softening and defense mechanisms | - | Marín‐Rodríguez et al., 2002 |
| 25 | *PT07_g36947* | Chr 07 | 37362699 | 37371475 | Alpha-amylase 3 | Starch metabolism, stomatal opening, and redox regulation | - | Gurrieri et al., 2019 |
| 26 | *PT07_g36948* | Chr 07 | 37379910 | 37382208 | Mitochondrial outer membrane protein porin of 36 kDa | Porins form channels in the mitochondrial membrane for metabolite transport | - | Hu et al., 2019 |
| 27 | *PT07_g36949* | Chr 07 | 37386585 | 37388765 | Hypothetical protein PHAVU_003G0695001g, partial |  | - |  |
| 28 | *PT07_g36950* | Chr 07 | 37394063 | 37398714 | Mediator of RNA polymerase II transcription subunit 10b-like isoform X1 | Acts as a coactivator, relaying signals from regulatory proteins to RNA polymerase II | - | Bäckström et al., 2007 |
| 29 | *PT07_g36951* | Chr 07 | 37401358 | 37404386 | Probable serine/threonine-protein kinase PIX7 |  | - | Diédhiou et al., 2008 |
| 30 | *PT07_g36952* | Chr 07 | 37420309 | 37427129 | Hypothetical protein GmHk_18G051599 |  | - |  |
| 31 | *PT07_g36953* | Chr 07 | 37445908 | 37452784 | Unnamed protein product |  | - |  |
| 32 | *PT07_g36954* | Chr 07 | 37502069 | 37503913 | Putative pentatricopeptide repeat-containing protein At5g40405 | RNA binding and modifications | - | Saha et al., 2007 |
| 33 | *PT07_g36955* | Chr 07 | 37526302 | 37526505 |  |  |  |  |
| ***qAnthol 1.1b*** | | | | | | | | |
| 34 | *PT04_g20857* | Chr 04 | 9066278 | 9068072 |  |  | - |  |
| 35 | *PT04_g20858* | Chr 04 | 9068114 | 9072693 | Hypothetical protein GLYMA_09G259200v4 |  | - |  |
| 36 | *PT04_g20859* | Chr 04 | 9074065 | 9076369 | Uncharacterised protein LOC100306693 |  | - |  |
| 37 | *PT04_g20860* | Chr 04 | 9079967 | 9092311 | Mediator of RNA polymerase II transcription subunit 12-like | Gene activation, transcription factor interactions, and stress response regulation | - | Wu et al., 2024 |
| 38 | *PT04_g20861* | Chr 04 | 9094589 | 9097804 | Rop guanine nucleotide exchange factor 3 isoform X2 | Polarized pollen tube growth, root stem cell maintenance, and stomatal closure | - | Berken et al., 2005 |
| 39 | *PT04_g20862* | Chr 04 | 9102825 | 9104161 | Gibberellin 3-beta-dioxygenase 4 | Inhibit flavonoid biosynthesis | Yes | Sun et al., 2021 |

**References**

1. Bäckström, S., Elfving, N., Nilsson, R., Wingsle, G., & Björklund, S. (2007). Purification of a plant mediator from Arabidopsis thaliana identifies PFT1 as the Med25 subunit. Molecular Cell, 26(5), 717-729. <https://doi.org/10.1016/j.molcel.2007.05.007>.
2. Berken, A., Thomas, C., & Wittinghofer, A. (2005). A new family of RhoGEFs activates the Rop molecular switch in plants. Nature, 436(7054), 1176-1180. <https://doi.org/10.1038/nature03883>.
3. Cai, X., Dong, F., Edelmann, R. E., & Makaroff, C. A. (2003). The Arabidopsis SYN1 cohesin protein is required for sister chromatid arm cohesion and homologous chromosome pairing. Journal of Cell Science, 116(14), 2999-3007. <https://doi.org/10.1242/jcs.00601>.
4. Cerritelli, S. M., & Crouch, R. J. (2009). Ribonuclease H: The enzymes in eukaryotes. FEBS Journal, 276(6), 1494-1505. <https://doi.org/10.1111/j.1742-4658.2009.06908.x>.
5. Diédhiou, C. J., Popova, O. V., Dietz, K. J., & Golldack, D. (2008). The SNF1-type serine-threonine protein kinase SAPK4 regulates stress-responsive gene expression in rice. BMC Plant Biology, 8, 49. <https://doi.org/10.1186/1471-2229-8-49>.
6. Graumann, K., Vanrobays, E., Tutois, S., Probst, A. V., Evans, D. E., & Tatout, C. (2014). Characterization of two distinct subfamilies of SUN-domain proteins in Arabidopsis and their interactions with the novel KASH-domain protein AtTIK. Journal of Experimental Botany, 65(22), 6499-6512. <https://doi.org/10.1093/jxb/eru368>.
7. Gurrieri, L., Distefano, L., Pirone, C., Horrer, D., Seung, D., Zaffagnini, M., Rouhier, N., Trost, P., Santelia, D., & Sparla, F. (2019). The thioredoxin-regulated α-amylase 3 of Arabidopsis thaliana is a target of S-glutathionylation. Frontiers in Plant Science, 10*,* 993. <https://doi.org/10.3389/fpls.2019.00993>.
8. Hu, Y., Zou, W., Wang, Z., Zhang, Y., Hu, Y., Qian, J., Wu, X., Ren, Y., & Zhao, J. (2019). Translocase of the outer mitochondrial membrane 40 is required for mitochondrial biogenesis and embryo development in Arabidopsis. Frontiers in Plant Science, 10, 389. <https://doi.org/10.3389/fpls.2019.00389>.
9. Kirik, A., Pecinka, A., Wendeler, E., & Reiss, B. (2006). The chromatin assembly factor subunit FASCIATA1 is involved in homologous recombination in plants. The Plant Cell, 18(10), 2431-2442. <https://doi.org/10.1105/tpc.106.045088>.
10. Marín-Rodríguez, M. C., Orchard, J., & Seymour, G. B. (2002). Pectate lyases, cell wall degradation and fruit softening. Journal of Experimental Botany, 53(377), 2115-2119. <https://doi.org/10.1093/jxb/erf089>.
11. Mehra, P., & Giri, J. (2020). Purple acid phosphatases (PAPs): Molecular regulation and diverse physiological roles in plants. Springer*.* <https://doi.org/10.1007/978-3-030-48733-1_3>.
12. Richmond, G. S., & Smith, T. K. (2011). Phospholipases A1. International Journal of Molecular Sciences, 12(1), 588-612. <https://doi.org/10.3390/ijms12010588>.
13. Saha, D., Prasad, A. M., & Srinivasan, R. (2007). Pentatricopeptide repeat proteins and their emerging roles in plants. Plant Physiology and Biochemistry, 45(8), 521-534. <https://doi.org/10.1016/j.plaphy.2007.03.026>.
14. Sun, H., Cui, H., Zhang, J., Kang, J., Wang, Z., Li, M., Yi, F., Yang, Q., & Long, R. (2021). Gibberellins inhibit flavonoid biosynthesis and promote nitrogen metabolism in *Medicago truncatula*. International Journal of Molecular Sciences, 22, 9291. <https://doi.org/10.3390/ijms22179291>.
15. Tang, T., Du, C., Song, H., Aziz, U., Wang, L., Zhao, C., & Zhang, M. (2019). Genome-wide analysis reveals the evolution and structural features of WRINKLED1 in plants. Molecular Genetics and Genomics, 294(2), 329-341. <https://doi.org/10.1007/s00438-018-1512-8>.
16. Wang, Z., Song, G., Zhang, F., Shu, X., & Wang, N. (2023). Functional characterization of AP2/ERF transcription factors during flower development and anthocyanin biosynthesis related candidate genes in *Lycoris*. International Journal of Molecular Sciences, 24(19), 14464. <https://doi.org/10.3390/ijms241914464>.
17. Wu, Y., Fu, Y., Zhu, Z., Hu, Q., Sheng, F., & Du, X. (2024). The mediator subunit OsMED16 interacts with the WRKY transcription factor OsWRKY45 to enhance rice resistance against Magnaporthe oryzae. Rice, 17(1), 23. <https://doi.org/10.1186/s12284-024-00698-9>.
18. Yanatori, I., Richardson, D. R., Toyokuni, S., & Kishi, F. (2020). The new role of poly (rC)-binding proteins as iron transport chaperones: Proteins that could couple with inter-organelle interactions to safely traffic iron. Biochimica et Biophysica Acta - General Subjects, 1864(11), 129685. <https://doi.org/10.1016/j.bbagen.2020.129685>.
19. Zheng, Y., Zhu, Y., Mao, X., Jiang, M., Wei, Y., Lian, L., Xu, H., Chen, L., Xie, H., Lu, G., & Zhang, J. (2022). SDR7-6, a short-chain alcohol dehydrogenase/reductase family protein, regulates light-dependent cell death and defence responses in rice. Molecular Plant Pathology, 23(1), 78-91. <https://doi.org/10.1111/mpp.13144>.
